# Supplementary material for: Gene Expression Changes in Phosphorus Deficient Potato (Solanum tuberosum L.) Leaves and the Potential for Diagnostic Gene Expression Markers
Source: PLoS One. 2011 Sep 14;6(9):e24606. doi: 10.1371/journal.pone.0024606 (PMC3173461; doi:10.1371/journal.pone.0024606)
Supplement: Table S1 — Normalised signal values and annotation data for 1,659 genes significantly (P<0.01) differentially expressed by more than 1.5 fold at two or more, of the seven time points. (XLSX) [file pone.0024606.s002.xlsx]

## Sheet: Sheet1
Table S1. Normalised signal values and annotation data for 1,659 genes significantly (P<0.01) differentially expressed by more than 1.5 fold at two or more, of the seven time points in the leaves of P deficient plants.
Potato plants were grown in an NFT hydroponic system under glasshouse conditions. Phosphorus was withdrawn from the nutrient solution supplying half the plants for 28 days, before being re-supplied. RNA was extracted from leaf samples using methods described by Hammond et al., [92] and hybridised to POCI 4x44k array [40]. Data were normalised in GeneSpring (Agilent Technologies) correcting for dy…
	Time (d) relevant to the withdrawal of P from the nutrient solution
	0	1	3	7	17	29	31
Probe ID	Normalised signal values							Cluster Group	Genbank	Description	TIGR ID	TIGR Description	SGN
TBSK04176FD12.t3m.scf	1.1914	0.953001	1.50056	1.07314	2.3779	3.78671	0.448569	Group I	NA	NA	CN516212		SGN-U278774
TBSK03849FA09.t3m.scf	0.488293	1.32207	1.03042	1.65616	0.497308	1.61555	1.03604	Group II	NA	NA	CN515964	similar to UP|Q7XBH6 (Q7XBH6) Ribosomal L9-like protein, partial (10%)	SGN-U278785
TBSK03731FG11.t3m.scf	1.90006	0.651682	0.847678	0.983347	2.17566	1.73074	0.252548	Group I	NA	NA	CN515882		SGN-U290724
TBSK03621FF09.t3m.scf	1.93041	0.922542	0.949122	0.956966	2.01289	1.41184	0.532721	Group I	NA	NA	TC135414	UP|CPI9_SOLTU (Q00652) Cysteine protease inhibitor 9 precursor (PKIX) (pT1), complete	SGN-U280995
TBSK03583FC07.t3m.scf	1.62436	0.563908	0.888685	1.30927	2.51258	3.12737	0.13422	Group I	AAM10491	aspartic proteinase inhibitor precursor P8G5 [Solanum tuberosum]	CN515772	homologue to SP|Q41480|API1_SOLTU Aspartic protease inhibitor 1 precursor (pA1) (gCDI-A1) (STPIA)(STPID). {Solanum tuberosum;}, partial (49%)	SGN-U281151
TBSK03256FH04.t3m.scf	0.985887	1.50888	0.823498	0.923301	1.14	2.37505	0.968885	Group II	NA	NA	CN515528		SGN-U297985
TBSK03243FG03.t3m.scf	1.00296	1.13455	0.958328	0.874164	0.654096	2.03579	0.659449	Group II	ABE83111	Isopenicillin N synthetase; KH, type 1 [Medicago truncatula]	CN515518		SGN-U287717
TBSK03136FF04.t3m.scf	1.04771	0.549774	1.10819	1.10303	1.82064	1.7961	0.961707	Group I	NA	NA	CN515423		SGN-U273697
TBSK02874FH06.t3m.scf	1.3993	0.765074	0.974584	0.784989	3.85545	2.27794	0.303603	Group I	AAZ94189	proteinase inhibitor II precursor [Solanum tuberosum]	CN515230	homologue to SP|Q41488|IP25_SOLTU Proteinase inhibitor type II P303.51 precursor. {Solanum tuberosum;}, partial (50%)	SGN-U268244
TBSK02741FE05.t3m.scf	0.526273	0.711177	1.06311	0.828367	0.598048	1.42879	1.14783	Group III	AAF42982	elongation factor 1 alpha [Zea mays]	DN941811		SGN-U277726
TBSK02401FA01.t3m.scf	1.21224	0.980481	1.02723	0.921221	1.72974	1.5802	0.849493	Group I	NA	NA	CN514855	similar to SP|Q00652|CPI9_SOLTU Cysteine protease inhibitor 9 precursor (PKIX) (pT1). {Solanum tuberosum;}, partial (25%)	SGN-U290580
TBSK01763Fc11.t3m.scf	1.70367	0.649423	0.851811	1.02957	2.19304	4.82833	0.305051	Group I	CAA31578	p340/p34021 [Solanum tuberosum]	CN514371	homologue to SP|Q00652|CPI9_SOLTU Cysteine protease inhibitor 9 precursor (PKIX) (pT1). {Solanum tuberosum;}, partial (32%)	SGN-U280995
TBSK01558Fb10.t3m.scf	0.632731	1.08184	0.971663	0.822566	0.52961	2.1679	0.984783	Group II	AAR89618	60S ribosomal protein L13a [Capsicum annuum]	TC134921	UP|Q3HRW1_SOLTU (Q3HRW1) 60S ribosomal protein L13a-like protein, complete	SGN-U268658
TBSK00801FC09.t3m.scf	2.17665	0.460811	0.718357	0.612669	1.7065	2.7055	0.176151	Group I	NA	NA	CN513643		SGN-U281138
TBSK00785FB05.t3m.scf	1.51385	0.981517	1.07084	1.14852	1.79025	1.37122	0.666385	Group I	NA	NA	CN513636		SGN-U280998
TBSK00673FA01.t3m.scf	1.83856	0.799338	0.916396	1.06972	2.55692	1.48497	0.320371	Group I	O24384	Cysteine protease inhibitor 8 precursor (PCPI-8) (Pcpi8)	CN513554	similar to SP|O24384|CPI8_SOLTU Cysteine protease inhibitor 8 precursor (PCPI-8) (Pcpi8) (Fragment). {Solanum tuberosum;}, partial (28%)	SGN-U280995
TBSK00537FE09.t3m.scf	1.95645	0.890451	0.978333	1.06462	2.03561	1.17614	0.395398	Group I	NA	NA	CN517253	homologue to SP|P20347|CPI1_SOLTU Cysteine protease inhibitor 1 precursor (PCPI 8.3) (P340) (P34021). {Solanum tuberosum;}, partial (33%)	SGN-U280995
TBSK00131FC11.t3m.scf	1.81332	0.984539	0.778096	1.04722	1.58425	2.06966	0.374665	Group I	AAB23206	aspartic proteinase inhibitor [potato, Peptide, 220 aa]	CN516940	similar to SP|P17979|API8_SOLTU Aspartic protease inhibitor 8 precursor (pi8) (PI-8) (API) (API-8)(Cathepsin D inhibitor)., partial (22%)	SGN-U281152
TBSK00011FA11.t3m.scf	1.26204	1.07537	1.03298	1.04105	1.57745	2.58426	0.870166	Group I	NA	NA	CN516410		SGN-U291612
STMJN52TV	1.11552	0.88934	1.73314	1.93279	1.03676	0.828306	1.39999	Group VI	NA	NA	TC162920		SGN-U296270
STMJN49TV	1.58373	0.694722	0.943461	0.963769	1.56792	1.3974	1.30734	Group I	NA	NA	BQ519027		SGN-U290613
STMJM74TV	1.15208	1.02202	1.27942	0.815571	1.79138	0.56341	0.514188	Group V	NA	NA	BQ518894		SGN-U294910
STMJM05TV	1.31269	0.857419	1.15616	0.52247	0.693763	0.369765	0.864316	Group IV	NA	NA	BQ518772		SGN-U280341
STMJE07TV	1.5057	1.74207	0.877985	1.0382	1.77699	1.21503	0.820269	Group I	NA	NA	BQ517498		SGN-U282759
STMJC84TV	1.397	0.91897	1.74419	2.00464	1.16755	1.5216	1.45126	Group VI	ABE78397	Leucine-rich repeat [Medicago truncatula]	BQ517303	weakly similar to UP|Q949G7 (Q949G7) HcrVf3 protein, partial (5%)	SGN-U273459
STMJA76TV	1.31569	0.827338	4.24066	5.2692	1.43777	2.06823	1.4048	Group VI	ABE82661	Tyrosine protein kinase, active site [Medicago truncatula]	BQ516953	similar to UP|Q8VZG8 (Q8VZG8) AT4g08850/T32A17_160, partial (8%)	SGN-U286758
STMJA73TV	0.800094	1.04218	1.54953	1.33484	1.04945	2.20439	0.749304	Group VI	CAC84552	putative receptor-like serine-threonine protein kinase [Solanum tuberosum]	TC137345	similar to UP|Q9XED4_PHAVU (Q9XED4) Receptor-like protein kinase homolog RK20-1, partial (22%)	SGN-U271841
STMIY86TV	1.10162	0.627583	1.06255	1.19372	1.35836	5.65411	0.530112	Group I	AAB39708	tryptophan decarboxylase [Camptotheca acuminata]	TC158117	similar to UP|P93082_CAMAC (P93082) Tryptophan decarboxylase , partial (51%)	SGN-U292858
STMIV34TV	1.0961	0.711052	1.72988	1.98401	1.27251	1.70468	1.52117	Group VI	BAC07504	receptor-like protein kinase [Nicotiana tabacum]	BQ516010	homologue to UP|Q8LP72 (Q8LP72) Receptor-like protein kinase, partial (30%)	SGN-U291037
STMIU70TV	1.21125	1.2035	1.02994	2.62058	1.74006	1.73489	1.02315	Group VIII	NP_173910	kinase [Arabidopsis thaliana]	BQ515900	weakly similar to UP|Q941D0 (Q941D0) At1g25390/F2J7_14, partial (32%)	SGN-U288841
STMIS76TV	1.51383	0.826204	5.86192	4.2152	1.02323	3.09046	1.80819	Group VI	ABE77148	putative WRKY transcription factor [Nicotiana tabacum]	BQ515558		SGN-U291132
STMID36TV	1.13477	1.54384	1.07886	0.56965	6.7453	4.2224	2.47275	Group I	NA	NA	BQ513218		SGN-U291343
STMIC16TV	1.1517	1.53326	1.21919	1.22534	0.750814	0.598361	0.641823	Group V	ABE81092	Sugar transporter superfamily [Medicago truncatula]	BQ513025		SGN-U293480
STMIA48TV	0.821202	1.9392	0.796957	0.965276	0.656011	2.43643	1.04156	Group II	NA	NA	BQ512766		SGN-U287412
STMHT49TV	1.06851	1.02674	0.93674	0.663419	0.646592	2.14663	1.10296	Group II	NA	NA	BQ511737		SGN-U295682
STMHO32TV	0.608051	1.35421	1.01864	0.865825	0.58761	0.670376	0.93777	Group V	NP_198810	oxidoreductase [Arabidopsis thaliana]	BQ510977	weakly similar to GB|AAP81799.1|32441248|BT At5g39940 {Arabidopsis thaliana;}, partial (35%)	SGN-U281052
STMHM11TV	0.438536	1.61908	1.05203	1.52679	1.35514	1.51204	0.984971	Group III	EAZ00286	hypothetical protein OsI_021518 [Oryza sativa (indica cultivar-group)]	BQ510694	weakly similar to UP|Q7RS84 (Q7RS84) TERT (Fragment), partial (0%)	SGN-U292266
STMHK24TV	1.4745	0.790153	0.631724	0.869019	1.53862	0.724532	0.641206	Group I	NA	NA	BQ510429		SGN-U298316
STMHG05TV	0.707036	1.01012	0.953395	0.736332	0.628088	0.464527	1.02737	Group V	ABE92111	hypothetical protein MtrDRAFT_AC144760g18v2 [Medicago truncatula]	BQ509891		SGN-U275583
STMHC16TV	0.809358	0.878819	1.12907	1.54149	3.36269	0.539286	0.980329	Group VII	NP_566373	ATP binding / nucleoside-triphosphatase/ nucleotide binding [Arabidopsis thaliana]	TC147184	similar to RF|NP_566373.2|30681308|NM_111877 ATP binding {Arabidopsis thaliana} (exp=-1; wgp=0; cg=0), partial (45%)	SGN-U285388
STMHB75TV	0.867391	0.750027	1.08771	1.19409	1.5577	1.647	1.29872	Group I	NA	NA	BQ509317		SGN-U297167
STMGU42TV	1.17479	0.79947	1.54436	1.90105	1.26646	1.26077	1.17486	Group VI	AAO59488	ser-thr protein kinase [Gossypium hirsutum]	BQ508109	weakly similar to UP|Q84U00 (Q84U00) Ser-thr protein kinase (Fragment), partial (52%)	SGN-U296889
STMGS83TV	0.953523	1.46969	0.908133	0.595041	0.526478	2.23529	1.20402	Group II	NA	NA	BQ507848		SGN-U297310
STMGS17TV	1.379	0.859924	0.928138	0.582669	1.30144	0.507246	0.519225	Group IV	S39507	glucuronosyl transferase homolog, ripening-related - tomato (fragment)	TC149850	similar to UP|Q94AB5_ARATH (Q94AB5) AT3g46660/F12A12_180 (Glucosyltransferase-like protein), partial (30%)	SGN-U291851
STMGR16TV	0.884937	1.35392	1.00153	0.653958	0.586488	2.63267	1.06814	Group II	NA	NA	BQ507578		SGN-U295543
STMGP32TV	0.663629	1.33866	0.876099	1.23726	0.592435	0.855933	1.08962	Group V	EAZ09911	hypothetical protein OsI_031143 [Oryza sativa (indica cultivar-group)]	TC145723	weakly similar to UP|Q651E9_ORYSA (Q651E9) Minichromosome maintenance protein 10 isoform 1-like, partial (39%)	SGN-U281474
STMGN22TV	0.944144	0.999851	0.962597	0.638719	0.585414	2.33535	0.828992	Group II	ABE82641	WD40-like; NLE [Medicago truncatula]	BQ506906	similar to UP|Q8H594 (Q8H594) OJ1634_B10.23 protein, partial (21%)	SGN-U297285
STMGM92TV	1.2507	1.86361	1.08881	0.982286	1.03271	0.374793	0.647834	Group V	AAK38344	seven transmembrane protein Mlo8 [Zea mays]	BQ506874	weakly similar to SP|O49621|MLO1_ARATH MLO-like protein 1 (AtMlo1) (MLO protein homolog 1) (AtMLO-H1). {Arabidopsis thaliana;}, partial (24%)	SGN-U292052
STMGM17TV	1.00706	0.661492	0.858235	0.47794	1.51766	0.635301	0.347119	Group I	AAB63623	cellulose synthase isolog [Arabidopsis thaliana]	TC152789	similar to UP|Q7E0V9_ORYSA (Q7E0V9) Cellulose synthase-like F7, partial (3%)	SGN-U269230
STMGL85TV	1.39586	1.40216	1.82478	1.4903	1.14179	2.01166	0.690305	Group VI	NA	NA	BQ506703		SGN-U292984
STMGI41TV	1.36714	1.09515	1.7468	2.10831	0.851016	1.50401	1.30373	Group VI	AAK27688	sulfate transporter 2 [Lycopersicon esculentum]	BQ506129	homologue to UP|Q9AT47 (Q9AT47) Sulfate transporter 2, partial (23%)	SGN-U290293
STMGF79TV	1.42877	0.995581	0.804079	1.08632	0.587309	0.651056	1.03256	Group V	AAF34801	F21J9.20-like protein [Euphorbia esula]	BQ505704	similar to UP|Q9LU88 (Q9LU88) Acetyltranferase-like protein, partial (3%)	SGN-U296720
STMGF63TV	0.871349	1.05174	1.86912	1.77369	0.77888	1.03948	0.729293	Group VI	AAF23892	pectin methyl esterase [Solanum tuberosum]	TC133645	UP|Q9SEE6_SOLTU (Q9SEE6) Pectin methyl esterase , complete	SGN-U270090
STMGA37TV	0.92417	1.2175	0.925204	1.08672	0.340029	0.664878	1.11905	Group V	NA	NA	BQ504842		SGN-U293827
STMEZ82TV	1.45731	1.01071	3.50932	4.87358	1.19248	1.8785	1.01609	Group VI	NA	NA	BQ121750		SGN-U293108
STMEU15TV	1.42147	0.866668	1.96435	2.4911	1.59842	1.14618	1.16316	Group VI	NP_565730	TEJ; poly(ADP-ribose) glycohydrolase [Arabidopsis thaliana]	BQ120909	weakly similar to GB|AAK72256.1|14701908|AF poly(ADP-ribose) glycohydrolase {Arabidopsis thaliana;}, partial (16%)	SGN-U291905
STMET46TV	1.15174	0.88405	1.25428	1.67679	1.04908	1.83114	1.04131	Group VI	NP_197965	kinase [Arabidopsis thaliana]	BQ504729		SGN-U291532
STMES46TV	1.31896	1.13667	1.94895	2.38153	1.29553	1.77103	1.14215	Group VI	BAC87845	leucine-rich repeat receptor-like protein kinase 1 [Populus nigra]	BQ120714	similar to UP|Q8VZG8 (Q8VZG8) AT4g08850/T32A17_160, partial (7%)	SGN-U286758
STMEJ08TV	0.6325	1.94499	1.05682	1.3181	0.71395	0.412233	0.65543	Group III	ABO84152	Protein kinase [Medicago truncatula]	TC158682	similar to GB|AAP21158.1|30102480|BT006350 At3g51740/T18N14_120 {Arabidopsis thaliana} (exp=-1; wgp=0; cg=0), partial (22%)	SGN-U294526
STMEG66TV	0.698289	0.947327	0.902512	1.70955	0.948799	4.77651	1.07876	Group VI	NA	NA	BQ119035		SGN-U290122
STMEE51TV	1.12132	1.00555	0.932063	0.609629	1.06674	0.610342	0.768869	Group IV	P25141	Alcohol dehydrogenase 1	BQ118789	homologue to PIR|S57819|S57819 alcohol dehydrogenase () - common tobacco (fragment) {Nicotiana tabacum;}, partial (15%)	SGN-U295562
STMED95TV	0.695778	1.89776	1.06966	1.31727	0.691322	0.62417	0.446023	Group V	BAC42527	putative WD-repeat protein [Arabidopsis thaliana]	BQ504645		SGN-U289941
STMED23TV	1.34565	0.628538	1.47432	2.21757	1.67333	1.34706	1.10079	Group VI	NP_174375	calcium ion binding / peptidase [Arabidopsis thaliana]	TC147768	similar to RF|NP_174375.1|15221538|NM_102827 calcium ion binding {Arabidopsis thaliana} (exp=-1; wgp=0; cg=0), partial (25%)	SGN-U292072
STMEA61TV	0.801335	1.21849	1.09761	1.08538	0.39723	0.47136	1.04686	Group V	NA	NA	BQ118402		SGN-U290618
STMDL32TV	0.534908	1.07399	1.10481	1.12285	0.33553	0.840665	1.27772	Group III	EAY83783	hypothetical protein OsI_037742 [Oryza sativa (indica cultivar-group)]	BQ116820	similar to UP|AAS07283 (AAS07283) Expressed protein (With alternative splicing) 5'-partial (Fragment), partial (16%)	SGN-U290393
STMDI02TV	1.35018	1.29088	0.813794	0.521881	0.561566	2.28784	0.910187	Group II	NA	NA	BQ116428		SGN-U290989
STMDH63TV	0.504178	1.39146	1.04913	1.58972	1.09083	0.62527	0.666431	Group III	AAN85207	DNA topoisomerase II [Nicotiana tabacum]	BQ116381	similar to UP|Q8GSC4 (Q8GSC4) DNA topoisomerase II, partial (8%)	SGN-U296677
STMDH24TH	1.75734	1.09821	0.963585	0.872747	0.759503	1.6268	0.871528	Group II	ABF06704	Joka20 [Nicotiana plumbaginifolia]	TC153568	homologue to GB|CAA44226.1|20020|NTRPL121A ribosomal protein L12-1a {Nicotiana tabacum} (exp=0; wgp=1; cg=0), partial (97%)	SGN-U269168
STMDH08TV	1.03885	1.3665	0.913385	0.662869	0.35553	2.00678	0.904013	Group II	NA	NA	BQ116307	similar to UP|Q8L4E7 (Q8L4E7) SAP-like protein, partial (13%)	SGN-U295197
STMDG94TV	1.06888	1.96644	1.11181	1.26663	0.769978	0.566455	0.563189	Group V	AAT40494	Putative microtubule-associated protein, identical [Solanum demissum]	BQ116292	similar to UP|Q9FHM4 (Q9FHM4) Emb|CAB82688.1, partial (3%)	SGN-U291398
STMDB94TV	1.61753	1.10051	2.17529	2.95204	1.0227	1.18987	1.21282	Group VI	NA	NA	BQ115555	homologue to UP|Q7QQ92 (Q7QQ92) GLP_243_18349_20043, partial (2%)	SGN-U296565
STMDB52TV	1.26902	1.51168	1.1453	1.09607	0.654193	0.639786	0.828099	Group V	CAB60838	CycD3;3 [Solanum lycopersicum]	BQ115507	homologue to UP|Q9SMD4 (Q9SMD4) CycD3 3 protein, partial (21%)	SGN-U292657
STMDA92TV	1.08316	0.527954	0.945644	1.26547	1.19557	0.598767	1.43091	Group IV	AAB87690	copper amine oxidase [Arabidopsis thaliana]	BQ115429		SGN-U298465
STMCY67TV	0.660592	0.909953	0.9031	1.37588	1.12974	0.638007	1.06571	Group III	NA	NA	BQ115118		SGN-U272387
STMCX54TV	1.31477	0.873088	0.585653	1.15966	1.51394	0.690966	0.34681	Group I	NA	NA	BQ114960		SGN-U291098
STMCV29TV	1.61478	1.2361	1.06971	1.16776	2.31536	1.3051	0.741587	Group I	NA	NA	BQ114624	similar to UP|Q9LW00 (Q9LW00) Genomic DNA chromosome 3 P1 clone: MSJ11, partial (5%)	SGN-U298614
STMCU53TV	2.44558	1.29167	0.98931	1.54077	1.28124	1.28377	0.508093	Group I	NP_567195	DNA binding / transcription factor [Arabidopsis thaliana]	BQ114509		SGN-U294399
STMCT65TH	2.10938	0.563867	0.969428	0.28444	1.39698	0.827859	0.344468	Group I	NA	NA	BQ114396		SGN-U289394
STMCT31TV	1.58114	1.35463	1.10943	0.520921	1.12824	0.55792	0.661552	Group V	P22928	Chalcone synthase J (Naringenin-chalcone synthase J)	BQ114342	similar to UP|Q8LP19 (Q8LP19) Chalcone synthase, partial (42%)	SGN-U291041
STMCQ65TH	0.873668	1.63713	1.25458	1.66007	0.77122	0.664372	0.609481	Group V	NP_001054970	Os05g0228000 [Oryza sativa (japonica cultivar-group)]	TC153753	similar to UP|Q5RZ94_THUOC (Q5RZ94) Bark protein-like protein, partial (5%)	SGN-U287222
STMCQ39TV	0.539718	1.8662	0.922155	1.24114	0.920088	0.645691	0.91111	Group III	YP_635678	ribosomal protein L22 [Solanum tuberosum]	TC154152	UP|Q2VEE1_SOLTU (Q2VEE1) Ribosomal protein L22, complete	SGN-U293381
STMCP37TV	0.727291	1.15752	0.807909	0.618369	0.436408	1.82054	0.910926	Group II	NA	NA	BQ113711		SGN-U293779
STMCO35TH	1.56133	0.884032	1.56929	0.550528	1.88573	4.11851	0.265038	Group I	NA	NA	TC162686		SGN-U286213
STMCN42TV	1.62968	1.02797	1.19452	1.18139	1.12502	1.61708	0.744556	Group I	AAC49528	WRKY3 [Petroselinum crispum]	BQ113410	homologue to UP|Q9FXS1 (Q9FXS1) WRKY transcription factor Nt-SubD48, partial (30%)	SGN-U290259
STMCN20TV	1.08624	1.20452	0.91158	0.66386	0.450192	1.53977	0.969858	Group II	AAN31811	unknown protein [Arabidopsis thaliana]	BQ113378		SGN-U294444
STMCI55TV	1.14619	0.917587	0.841996	0.614754	3.77854	7.07742	0.217373	Group I	Q08304	Polyphenol oxidase B, chloroplast precursor (PPO) (Catechol oxidase)	BQ112653	weakly similar to PIR|T07097|T07097 catechol oxidase () (allele POT33) - potato {Solanum tuberosum;} (EC 1.10.3.1), partial (15%)	SGN-U277478
STMCI55TH	1.01403	0.777406	0.661939	0.564042	2.52064	7.13348	0.268272	Group I	Q08304	Polyphenol oxidase B, chloroplast precursor (PPO) (Catechol oxidase)	TC157408	similar to UP|Q41428_SOLTU (Q41428) Polyphenol oxidase, partial (40%)	SGN-U268096
STMCG29TH	0.674261	1.33391	0.919263	0.966106	0.259116	0.374409	0.995812	Group V	XP_853903	PREDICTED: similar to histone 1, H2ai (predicted) [Canis familiaris]	TC152793	UP|Q76MV0_TOBAC (Q76MV0) H3 histone, partial (88%)	SGN-U287484
STMCE81TV	1.48857	0.823783	1.15912	1.17572	1.51329	1.95197	0.95948	Group I	NA	NA	BQ112058		SGN-U281324
STMCD21TV	2.07156	0.855527	0.787149	1.25029	1.77148	0.756082	0.912747	Group I	NA	NA	BQ111813		SGN-U290802
STDB005L21u.scf	0.539491	0.52119	1.0401	1.16576	1.89919	1.08921	1.02227	Group III	ABB87123	aspartic protease precursor-like [Solanum tuberosum]	CK262983	homologue to PIR|S71591|S71591 aspartic proteinase precursor wound-induced - tomato {Lycopersicon esculentum;}, partial (59%)	SGN-U270136
STDB005B07u.scf	1.33411	1.25842	1.01182	1.33795	1.65966	1.66191	0.88348	Group I	CAC82812	resistance gene-like [Solanum tuberosum subsp. andigena]	TC143798	weakly similar to UP|Q93YA7_SOLTU (Q93YA7) Resistance gene-like, partial (6%)	SGN-U271970
STDB002K20u.scf	0.970627	1.11908	1.03149	0.664896	0.512204	1.55764	0.873751	Group II	ABB16984	thaliana 60S ribosomal protein L7 (At2g44120) [Solanum tuberosum]	TC156613	similar to UP|Q5D4P9_TOBAC (Q5D4P9) Cinnamyl alcohol dehydrogenase 1, partial (93%)	SGN-U268535
STDB002B18u.scf	0.574804	1.60102	1.04005	0.79217	0.730203	2.76273	0.809557	Group II	NA	NA	TC152341	similar to RF|NP_181567.3|42569798|NM_129596 nucleotide binding {Arabidopsis thaliana} (exp=-1; wgp=0; cg=0), partial (16%)	SGN-U277558
SSBT005M24x.scf	1.52615	1.06295	0.997752	0.84839	1.88579	0.83477	0.410156	Group I	NA	NA	TC155477	wound-inducible proteinase inhibitor I	SGN-U268407
SSBT005G08x.scf	0.727148	1.24101	1.00342	0.663323	0.519506	1.42298	0.760668	Group II	ABA46764	unknown [Solanum tuberosum]	TC135340	homologue to UP|Q6TKT4_SOLBR (Q6TKT4) 60S ribosomal protein L13 (Fragment), complete	SGN-U268691
SSBT005E11x.scf	0.63021	1.13163	0.878982	0.941241	0.547261	0.729167	0.940726	Group V	NA	NA	TC162053	similar to UP|Q9SGT3_ARATH (Q9SGT3) T6H22.14 protein, partial (27%)	SGN-U279787
SSBT004P07x.scf	1.12531	0.714562	0.954879	0.878487	2.90913	3.05098	0.601975	Group I	NA	NA	TC145196	homologue to UP|NLTP1_LYCES (P93224) Nonspecific lipid-transfer protein 1 precursor (LTP 1), complete	SGN-U268923
SSBT003L08x.scf	0.965998	1.09414	0.835064	0.370708	0.583691	0.646599	0.867538	Group V	ABE79318	Plant lipid transfer/seed storage/trypsin-alpha amylase inhibitor [Medicago truncatula]	CV503535		SGN-U271897
SSBT002E20x.scf	1.15466	0.862646	1.04578	0.964742	1.58007	1.73699	0.982375	Group I	NP_197953	TNY; DNA binding / transcription factor [Arabidopsis thaliana]	TC148625	similar to RF|NP_196720.1|15239113|NM_121197 DNA binding {Arabidopsis thaliana} (exp=-1; wgp=0; cg=0), partial (52%)	SGN-U277520
SSBT001F02x.scf	0.666852	0.818385	0.983798	0.694072	0.516195	4.1444	0.659609	Group II	NA	NA	TC160005	weakly similar to GB|AAK96448.1|15450541|AY052734 AT5g05990/K18J17_19 {Arabidopsis thaliana} (exp=-1; wgp=0; cg=0), partial (34%)	SGN-U272127
SSBN003N17u.scf	0.864982	1.18698	1.03806	0.655259	0.647541	2.25269	0.96	Group II	NP_197111	ATP binding / protein binding [Arabidopsis thaliana]	TC142190	homologue to RF|NP_186902.1|15232923|NM_111120 ATP binding {Arabidopsis thaliana} (exp=-1; wgp=0; cg=0), partial (45%)	SGN-U276377
SSBN003C23u.scf	1.55884	0.940622	0.955718	1.20371	1.51809	2.4429	1.12094	Group I	AAP88588	putative zinc transporter [Oryza sativa (japonica cultivar-group)]	DR035500		SGN-U291440
SSBN002F09u.scf	0.580395	1.04865	0.850965	0.969496	1.15294	0.365044	0.976987	Group III	AAM65899	pollen allergen-like protein [Arabidopsis thaliana]	NA	NA
SSBN002A04u.scf	0.719413	0.857461	1.01198	1.26084	1.52458	1.76492	1.00669	Group I	NP_201068	galactosyltransferase/ transferase, transferring hexosyl groups [Arabidopsis thaliana]	BQ505943		SGN-U292165
SSBN001P01u.scf	0.749311	0.938415	0.822216	0.529305	0.494052	0.475751	0.925375	Group V	NP_566098	transcription factor/ transcription regulator [Arabidopsis thaliana]	TC150679	weakly similar to UP|O22901_ARATH (O22901) Expressed protein (At2g47270), partial (31%)	SGN-U268629
SSBN001L22u.scf	1.55791	1.17576	0.61875	1.0701	1.79219	1.47821	0.797045	Group I	ABI34321	RNase H family protein [Solanum demissum]	TC160851	weakly similar to UP|Q7QLA5_ANOGA (Q7QLA5) ENSANGP00000013520 (Fragment), partial (12%)	SGN-U285768
SSBN001F12u.scf	1.9142	0.85507	1.06336	0.628713	2.57956	0.903843	0.330457	Group I	BAE93149	methyl jasmonate induced MYB-related transcription factor [Nicotiana tabacum]	TC161104	similar to UP|Q2LME1_MALDO (Q2LME1) MYB23, partial (22%)	SGN-U278843
SSBN001E01u.scf	0.280187	2.47745	0.761664	1.19742	0.697012	1.53831	0.843272	Group II	YP_514842	RNA polymerase beta'' subunit [Solanum lycopersicum]	TC139189	UP|RPOC2_SOLTU (Q2VEI6) DNA-directed RNA polymerase beta'' chain (PEP) (Plastid-encoded RNA polymerase beta'' subunit) (RNA polymerase beta'' subunit) , complete	SGN-U294152
SSBN001B09u.scf	0.894966	1.32107	0.658321	2.11685	0.945358	0.540521	0.835863	Group VIII	NA	NA	TC156388		SGN-U276799
SDBN006P03u.scf	0.279058	1.31965	1.12714	1.58123	1.51251	1.16918	0.733087	Group III	NA	NA	NA	NA
SDBN006D14u.scf	0.730045	1.05193	0.834535	0.601844	0.472401	1.75046	1.04739	Group II	Q6H601	DEAD-box ATP-dependent RNA helicase 22	TC157432	similar to UP|Q944S1_ARATH (Q944S1) At1g59990/T2K10_4, partial (69%)	SGN-U275794
SDBN005L20u.scf	0.834724	0.85714	1.10463	0.618727	0.476285	3.31934	1.144	Group II	AAR11299	lectin-like receptor kinase 7;2 [Medicago truncatula]	NA	NA
SDBN005L02u.scf	0.914301	1.07372	0.871589	0.623682	0.612467	0.919836	1.03106	Group II	AAB99757	malate dehydrogenase precursor [Medicago sativa]	TC142194	homologue to UP|Q9XQP4_TOBAC (Q9XQP4) NAD-malate dehydrogenase precursor , complete	SGN-U272855
SDBN005J07u.scf	0.581619	1.12861	0.956924	0.972198	0.605928	1.13718	1.5685	Group III	NA	NA	TC142825		SGN-U271640
SDBN004P15u.scf	1.38916	1.20576	0.875869	0.841199	0.716339	0.348206	0.5575	Group V	NA	NA	NA	NA
SDBN004J11u.scf	1.51707	0.949312	0.932847	0.779171	1.18606	1.71251	1.06597	Group I	NA	NA	NA	NA
SDBN004G14u.scf	1.06382	1.24644	1.067	1.03134	0.491651	0.374348	0.758651	Group V	NP_193073	unknown protein [Arabidopsis thaliana]	NA	NA
SDBN004G13u.scf	0.569507	1.08137	0.900574	0.890204	0.622682	1.40412	0.968916	Group II	NP_001055273	Os05g0349800 [Oryza sativa (japonica cultivar-group)]	TC161557	weakly similar to UP|Q7XUX5_ORYSA (Q7XUX5) Peptidyl-prolyl cis-trans isomerase, partial (10%)	SGN-U285736
SDBN003O17u.scf	0.698025	1.53786	0.796319	0.985812	0.465597	1.63662	0.758706	Group II	NA	NA	TC140601	similar to UP|IF3A_TOBAC (Q40554) Eukaryotic translation initiation factor 3 subunit 10 (eIF-3 theta) (Eukaryotic translation initiation factor 3 large subunit) (eIF3a) (PNLA-35), partial (28%)	SGN-U279409
SDBN003J03u.scf	0.83324	1.00361	0.956863	0.611273	0.49874	1.8566	0.90254	Group II	AAP80667	ribosomal Pr 117 [Triticum aestivum]	TC148986	UP|Q7X9K1_WHEAT (Q7X9K1) Ribosomal Pr 117 (Fragment), partial (95%)	SGN-U277930
SDBN003G11u.scf	0.620302	1.03617	1.22649	1.65668	0.829021	1.80532	0.879179	Group VI	ABM55247	calmodulin-binding protein [Beta vulgaris]	TC158807	similar to RF|NP_974673.2|79610240|NM_202944 calmodulin binding {Arabidopsis thaliana} (exp=-1; wgp=0; cg=0), partial (6%)	SGN-U279124
SDBN003G05u.scf	0.945678	0.750789	1.37953	0.454451	0.779605	3.63136	2.88861	Group I	NP_199153	unknown protein [Arabidopsis thaliana]	NA	NA
SDBN002P07u.scf	0.293738	0.647225	1.0422	1.11635	0.828427	0.821886	1.12753	Group III	AAT39005	AML1 [Lycopersicon esculentum]	TC141751	homologue to UP|Q6J732_LYCES (Q6J732) AML1, partial (7%)	SGN-U297944
SDBN002M02u.scf	1.54474	0.913038	1.18558	0.744793	0.892792	2.59411	1.2718	Group I	BAB41200	TMV response-related gene product [Nicotiana tabacum]	DN590462		SGN-U285059
SDBN002K22u.scf	0.335803	0.986336	1.20211	1.25559	1.29993	0.657716	1.08592	Group III	EAT77606	hypothetical protein SNOG_15063 [Phaeosphaeria nodorum SN15]	NA	NA
SDBN002F16u.scf	0.579229	0.877998	0.919449	0.901155	0.481392	3.55348	0.781082	Group II	NP_175279	unknown protein [Arabidopsis thaliana]	NA	NA
SDBN002E16u.scf	1.09676	1.14277	0.864444	0.82028	0.653224	0.499079	0.987582	Group V	AAZ79233	putative xylanase Xyn2 [Nicotiana tabacum]	TC140031		SGN-U278940
SDBN002A01u.scf	1.75726	2.02606	0.912006	1.5672	0.909265	0.698134	0.970724	Group VIII	NA	NA	BQ120022	similar to UP|Q84PD2 (Q84PD2) AOBP-like protein, partial (3%)	SGN-U297395
SDBN001P16u.scf	0.81057	1.08967	1.02285	0.847011	1.35252	2.39201	1.60818	Group I	NP_175525	unknown protein [Arabidopsis thaliana]	NA	NA
SDBN001K06u.scf	0.600239	1.13942	1.01434	1.14133	1.08305	0.529115	1.0392	Group III	ABB88567	PhoB [Chlamydomonas reinhardtii]	NA	NA
SDBN001H19u.scf	1.2574	0.88482	1.50806	1.47139	0.950719	1.50268	1.0156	Group VI	Q03662	Probable glutathione S-transferase (Auxin-induced protein PGNT1/PCNT110)	TC158156	similar to UP|Q2HTW4_MEDTR (Q2HTW4) Protein kinase, partial (80%)	SGN-U273804
SDBN001D08u.scf	1.00103	1.13842	1.03225	0.944392	0.439121	0.600978	1.07048	Group V	ABD33168	DNA repair metallo-beta-lactamase [Medicago truncatula]	DV626404		SGN-U291464
SDBN001B04u.scf	0.335348	1.14588	1.09445	1.63876	1.34885	1.19735	1.65173	Group III	NA	NA	NA	NA
SDBN001A08u.scf	1.0337	1.13195	0.938061	0.66636	0.555473	1.83429	0.898186	Group II	ABB29931	P40-like protein [Solanum tuberosum]	TC150654	homologue to UP|Q38M60_SOLTU (Q38M60) Ribosome-associated protein p40-like, partial (69%)	SGN-U268631
PPCCE24TH	1.21472	1.19651	2.18954	2.49913	0.63963	0.964197	1.13015	Group VI	AAO22065	NtPRp27-like protein [Solanum tuberosum]	BI435412	homologue to UP|Q84XQ4 (Q84XQ4) NtPRp27-like protein, partial (63%)	SGN-U288362
PPCBW83TH	1.28788	0.73863	1.19664	2.77279	1.07999	1.50168	1.26422	Group VI	AAV33691	Hcr9-OR2C [Lycopersicon pimpinellifolium]	BI434982	similar to UP|O50023 (O50023) Hcr9-9A, partial (19%)	SGN-U288213
PPCBV08TH	1.03939	0.808521	1.24554	0.534717	1.32028	0.457082	0.680577	Group IV	NA	NA	BI434823		SGN-U292748
PPCBI52TH	2.38572	0.970776	8.53323	3.4876	0.517933	0.812106	2.63473	Group VI	AAF61863	DNA-binding protein 3 [Nicotiana tabacum]	TC151567	similar to UP|Q9M6E1_TOBAC (Q9M6E1) DNA-binding protein 3, partial (36%)	SGN-U272611
PPCBH49TH	0.634144	0.381002	0.902961	0.582062	1.20628	1.56972	0.807528	Group III	AAD39593	10A19I.8 [Oryza sativa (japonica cultivar-group)]	BI433702	similar to AAS09994 (AAS09994) MYB transcription factor, partial (71%)	SGN-U289858
PPCBE53TH	1.6511	0.830306	0.940011	0.4794	3.31278	7.35208	0.164278	Group I	P37842	Multicystatin (MC)	TC155607	UP|CYTM_SOLTU (P37842) Multicystatin (MC), complete	SGN-U289636
PotatoF1106.scf	0.342797	1.27064	1.05023	1.94051	1.83399	0.743479	0.997612	Group III	NA	NA	NA	NA
PotatoF0996.scf	0.817305	0.925978	1.23663	2.96126	20.5076	50.8222	1.40224	Group I	NA	NA	TC152755	weakly similar to UP|Q9LPR3_ARATH (Q9LPR3) F15H18.4, partial (3%)	SGN-U278900
POCD505TP	0.615955	0.910528	1.04706	0.785685	1.90801	0.620624	2.22617	Group IV	AAB52786	NADH nitrate reductase [Solanum tuberosum]	TC132781	UP|O04926_SOLTU (O04926) NADH nitrate reductase , complete	SGN-U271417
POCD027TP	0.713503	1.51727	0.870479	1.09779	0.529824	0.561874	1.20817	Group V	ABE65853	unknown [Arabidopsis thaliana]	CK256807		SGN-U275804
POCCV12TV	0.551956	1.04361	1.03099	0.947324	0.651604	1.28055	1.08191	Group III	ABA81881	unknown [Solanum tuberosum]	CK256657		SGN-U287732
POCCT32TP	0.542261	0.818977	0.966606	0.882281	0.968249	0.497464	1.23005	Group III	AAM12957	GTP-binding protein LepA homolog [Arabidopsis thaliana]	CK243570	similar to UP|Q9FNM5 (Q9FNM5) GTP-binding protein LepA homolog, partial (27%)	SGN-U285850
POCCR32TV	1.64263	1.2383	0.8524	0.833149	0.927315	1.58457	1.18038	Group I	NA	NA	CK256190		SGN-U277842
POCCI86TV	1.03212	0.947805	1.58064	2.00079	1.93997	1.25518	0.980745	Group VII	ABF60001	lipoxygenase 5 [Actinidia deliciosa]	CK255134		SGN-U296125
POCCG14TP	0.562681	0.594518	1.04335	0.827637	0.80848	1.05548	0.987192	Group III	NP_196467	unknown protein [Arabidopsis thaliana]	CK254775	similar to UP|Q9FNN8 (Q9FNN8) Cleft lip and palate associated transmembrane protein-like, partial (38%)	SGN-U270165
POCC559TP	0.43025	1.15165	1.09714	1.29279	1.68011	0.652325	0.989312	Group III	NP_564110	unknown protein [Arabidopsis thaliana]	CK253460		SGN-U284399
POCB408TV	0.560115	1.00695	0.913621	1.41025	1.48739	0.436531	1.0504	Group III	ABE90425	ATP-dependent DNA ligase; Metal-dependent phosphohydrolase, HD region; TGS; DNA polymerase III clamp loader subunit, C-terminal [Medicago truncatula]	TC162837	weakly similar to UP|Q9UYT7_PYRAB (Q9UYT7) MoaD molybdopterin synthase, small subunit, partial (25%)	SGN-U291823
POCB408TP	0.566511	0.789133	1.0054	1.02686	1.21734	0.645279	1.32067	Group III	ABE90425	ATP-dependent DNA ligase; Metal-dependent phosphohydrolase, HD region; TGS; DNA polymerase III clamp loader subunit, C-terminal [Medicago truncatula]	TC158763	weakly similar to UP|Q2ZJD9_CALSA (Q2ZJD9) RelA/SpoT protein, partial (12%)	SGN-U280050
POCAV06TV	1.99351	1.01593	1.7212	1.6819	1.02008	1.01576	1.14363	Group VI	AAQ57264	anti-bacterial protein [Solanum tuberosum]	TC146863	UP|Q6WBY1_SOLTU (Q6WBY1) Anti-bacterial protein, partial (36%)	SGN-U280855
POCAO76TV	0.436935	0.95615	1.18144	1.33324	1.1361	0.554904	1.09321	Group III	XP_001145371	PREDICTED: hypothetical protein [Pan troglodytes]	NA	NA
POCAC44TP	0.415646	0.94794	0.991092	1.03861	0.944768	0.663936	1.18199	Group III	ABE78340	Peptidase C19, ubiquitin carboxyl-terminal hydrolase 2; Zinc finger, FYVE/PHD-type [Medicago truncatula]	CK245196		SGN-U271874
POCA872TP	0.483207	0.700269	1.03236	0.96193	1.14939	0.608019	1.08132	Group III	AAP47635	lecithine cholesterol acyltransferase-like protein [Medicago truncatula]	CK244436	similar to GB|AAK96619.1|15450695|AY AT5g13640/MSH12_10 {Arabidopsis thaliana;}, partial (29%)	SGN-U271802
POAE894TP	0.444261	0.674242	1.03221	1.39283	1.33965	0.621703	1.08501	Group III	AAZ83348	CDPK-related protein kinase [Gossypium hirsutum]	TC158587	similar to UP|Q2QDF4_GOSHI (Q2QDF4) CDPK-related protein kinase, partial (31%)	SGN-U293086
POAE467TV	1.05453	0.76244	1.12894	1.94228	1.50065	1.45616	1.07559	Group VI	NP_195118	catalytic/ protein phosphatase type 2C [Arabidopsis thaliana]	TC150528	similar to GB|AAL87371.1|19548015|AY081718 AT4g33920/F17I5_110 {Arabidopsis thaliana} (exp=-1; wgp=0; cg=0), partial (81%)	SGN-U292450
POADW11TP	0.455567	0.688286	1.5598	1.04156	1.11837	2.48046	0.657798	Group III	AAK62821	auxin-regulated dual specificity cytosolic kinase [Lycopersicon esculentum]	TC141705	homologue to UP|Q94FU1_LYCES (Q94FU1) Auxin-regulated dual specificity cytosolic kinase, complete	SGN-U292803
POADJ94TP	0.585484	0.826407	0.980654	1.04378	1.16631	0.520128	0.927919	Group III	BAC41900	putative protein kinase [Arabidopsis thaliana]	CK274876		SGN-U283838
POADH91TP	0.860791	0.648052	1.0077	0.980189	1.11051	0.528943	1.03019	Group IV	AAR13304	phytochelatin synthetase-like protein [Phaseolus vulgaris]	CK274542	similar to GB|AAM62930.1|21553837|AY phytochelatin synthetase-like protein {Arabidopsis thaliana;}, partial (55%)	SGN-U270699
POADG28TV	0.466916	1.06636	0.987395	1.29768	1.27498	0.611869	0.89902	Group III	NA	NA	CK274266		SGN-U296522
POADF30TP	0.54519	0.747001	1.01	0.953909	0.927498	0.624405	1.04338	Group III	AAP79443	glycerol-3-phosphate acyltransferase [Capsicum annuum]	TC160823	homologue to UP|Q6UUW0_LYCES (Q6UUW0) Glycerol-3-phosphate acyltransferase, partial (68%)	SGN-U273783
POAD478TP	1.09589	1.09444	0.994941	1.09477	0.467435	0.658517	0.889659	Group V	CAA63541	cyclin A-like protein [Nicotiana tabacum]	CK272374	similar to PIR|T02968|T02968 cyclin A-type (clone 59) - common tobacco {Nicotiana tabacum;}, partial (47%)	SGN-U278374
POACX17TP	0.539473	1.13263	0.895653	1.21262	0.771278	0.562977	1.2391	Group III	NP_174489	unknown protein [Arabidopsis thaliana]	CK271094		SGN-U273410
POACW72TP	0.520038	0.583605	0.968941	0.996074	1.10389	1.05965	1.03675	Group III	NP_849822	CAT2 (CATIONIC AMINO ACID TRANSPORTER 2); amino acid-polyamine transporter [Arabidopsis thaliana]	CK271028		SGN-U296601
POACR96TV	1.07947	0.598793	0.799874	0.601574	0.659669	0.912837	1.42813	Group III	BAD93688	glucosyltransferase NTGT4 [Nicotiana tabacum]	CK270247	weakly similar to UP|AAR06917 (AAR06917) UDP-glycosyltransferase 73E1, partial (26%)	SGN-U272496
POACG68TP	0.563258	0.627606	1.23701	0.969217	1.22262	1.62877	1.24972	Group I	AAK84008	beta-amylase PCT-BMYI [Solanum tuberosum]	TC133341	UP|Q94EU9_SOLTU (Q94EU9) Beta-amylase PCT-BMYI , complete	SGN-U278074
POAC948TV	0.886329	0.779719	0.950608	0.987149	1.56935	1.60766	1.34513	Group I	ABO82049	Protein of unknown function DUF81 [Medicago truncatula]	CK267239	similar to GB|AAO63445.1|28951043|BT At2g25737 {Arabidopsis thaliana;}, partial (42%)	SGN-U292559
POAC705TP	0.643567	0.62117	1.03992	0.994137	1.83552	0.834785	1.24027	Group IV	AAK62372	Unknown protein [Arabidopsis thaliana]	TC158106	weakly similar to GB|AAF61626.1|7384980|AF133717 stress enhanced protein 2 {Arabidopsis thaliana} (exp=-1; wgp=0; cg=0), partial (39%)	SGN-U269609
POAC664TV	0.721727	0.811181	0.86819	0.839277	0.428228	0.336283	0.777055	Group V	NP_191747	CYP78A9 (CYTOCHROME P450 78A9); oxygen binding [Arabidopsis thaliana]	TC154689	similar to UP|Q2MJ07_MEDTR (Q2MJ07) Cytochrome P450 monooxygenase CYP78A, partial (26%)	SGN-U275672
POABW81TP	0.587323	0.612857	0.952666	1.2687	1.22337	0.81862	1.24443	Group III	AAF43234	EST gb|AI998820 comes from this gene. [Arabidopsis thaliana]	CK265111	similar to UP|Q94BU1 (Q94BU1) At1g71810/F14O23_17, partial (28%)	SGN-U277472
POABW39TP	1.09158	0.482149	0.986761	0.957984	1.30033	0.54866	2.02411	Group IV	AAM67266	unknown [Arabidopsis thaliana]	CK265039		SGN-U293912
POABU12TP	0.63136	0.635951	0.948256	1.14105	1.28062	0.996543	1.03474	Group III	AAK82651	RSH-like protein [Capsicum annuum]	CK264672	homologue to UP|Q94B18 (Q94B18) RSH-like protein, partial (35%)	SGN-U293206
POABP77TP	0.624695	0.784134	0.920093	1.31459	1.15525	0.371196	1.116	Group III	NA	NA	TC155054		SGN-U293151
POABM96TP	0.580902	0.429259	0.952591	1.13367	1.06348	0.937527	0.913027	Group III	AAD03431	similar to the subtilase family of serine proteases (Pfam: PF00082, score; 45.8, E=1.1e-11, n=2) [Arabidopsis thaliana]	CK263509		SGN-U276556
POABM58TP	0.34429	0.579276	1.27209	1.07975	1.09119	0.798574	1.03535	Group III	AAV65494	trehalose 6-phosphate synthase [Gossypium hirsutum]	CK263449	similar to PIR|T02267|T02267 trehalose-6-phosphate synthase homolog T13D8.4 - Arabidopsis thaliana, partial (20%)	SGN-U297491
POABI83TP	1.68626	1.71266	0.97405	1.74388	2.7769	0.914975	0.64545	Group VII	NP_564956	unknown protein [Arabidopsis thaliana]	CK262858		SGN-U277769
POABE12TP	1.38938	0.643812	1.25962	0.63048	0.782873	2.20129	1.02689	Group I	BAA05079	zinc-finger protein [Petunia x hybrida]	TC160462	homologue to UP|Q40899_PETHY (Q40899) Zinc-finger protein, partial (45%)	SGN-U291762
MICRO.9980.C1	1.10849	1.14726	0.953175	1.09907	0.398981	0.664163	0.944705	Group V	NP_193167	unknown protein [Arabidopsis thaliana]	TC144068	similar to UP|Q2V3I5_ARATH (Q2V3I5) Protein At4g14310, partial (21%)	SGN-U278237
MICRO.9908.C2	1.51322	1.12188	1.43727	0.321041	1.85384	0.303536	0.667767	Group IV	NP_566847	unknown protein [Arabidopsis thaliana]	TC159802	similar to GB|AAP53024.1|31431209|AE016959 Uncharacterized ACR, COG1678 {Oryza sativa (japonica cultivar-group)} (exp=0; wgp=1; cg=0), partial (56%)	SGN-U272738
MICRO.9895.C1	1.04275	0.785548	1.79818	1.67527	0.964923	0.74743	1.64532	Group VI	AAW67002	WRKY transcription factor-c [Capsicum annuum]	TC161640	similar to UP|Q5DJV3_CAPAN (Q5DJV3) WRKY transcription factor-c, partial (64%)	SGN-U279595
MICRO.9893.C1	1.0855	1.63004	1.30459	1.2746	0.780632	0.618286	0.599362	Group V	NA	NA	TC138842	similar to UP|Q94JV9_ARATH (Q94JV9) AT4g15140/dl3615c, partial (24%)	SGN-U277461
MICRO.9842.C1	0.801161	0.780438	1.04425	0.614972	0.577158	1.38601	1.38484	Group II	CAA87068	non-photosynthetic ferredoxin [Citrus sinensis]	TC147603	weakly similar to UP|FER3_MAIZE (P27788) Ferredoxin-3, chloroplast precursor (Ferredoxin III) (Fd III), partial (69%)	SGN-U278531
MICRO.9836.C1	1.10696	1.22696	0.96858	0.723076	0.596399	0.50839	1.15913	Group V	1101277A	histone H4	TC153129	UP|Q76N07_SOLME (Q76N07) Histone H4-like protein, complete	SGN-U286828
MICRO.98.C8	1.45032	0.69501	1.33112	1.80887	2.40986	0.631012	1.31733	Group VII	ABJ91234	CBL-interacting protein kinase 6 [Populus trichocarpa]	TC162917	similar to UP|Q94A54_ARATH (Q94A54) AT5g25110/T11H3_120, partial (55%)	SGN-U287541
MICRO.9789.C1	1.51631	1.2558	5.37113	0.25287	1.53042	1.49006	0.892261	Group IV	NP_200466	unknown protein [Arabidopsis thaliana]	TC149630	weakly similar to UP|Q94JH8_ORYSA (Q94JH8) Cold induced protein-like, partial (26%)	SGN-U277416
MICRO.9760.C2	1.43611	0.694877	1.53939	1.4997	1.20872	1.57952	1.06777	Group VI	ABB89014	CXE carboxylesterase [Actinidia arguta]	TC133709	weakly similar to UP|Q9LVB8_ARATH (Q9LVB8) HSR203J protein-like protein, partial (47%)	SGN-U270658
MICRO.973.C7	0.978711	1.97482	0.753307	1.55572	0.758957	2.0313	0.754234	Group II	NA	NA	TC140680	homologue to GB|CAA67584.1|1430844|LEAGP1G arabinogalactan {Lycopersicon esculentum} (exp=-1; wgp=0; cg=0), partial (20%)	SGN-U281857
MICRO.9725.C1	1.14394	1.29759	1.05718	0.66511	0.6366	1.07374	0.916729	Group II	BAD95794	similar to 60S ribosomal protein L35 [Solanum lycopersicum]	TC146867	homologue to UP|RL35_EUPES (Q9M5L0) 60S ribosomal protein L35, complete	SGN-U281679
MICRO.9710.C1	0.567191	0.996248	1.0548	1.30386	1.15835	0.464567	0.977323	Group III	AAM47579	putative serine/ threonine kinase [Sorghum bicolor]	TC146606	homologue to UP|Q9LQA1_ARATH (Q9LQA1) F4N2.17, partial (21%)	SGN-U280722
MICRO.971.C1	0.663045	0.583197	0.992628	0.825532	0.957401	0.861268	0.929613	Group III	AAF70851	F24O1.4 [Arabidopsis thaliana]	TC162129	similar to UP|Q9MAV5_ARATH (Q9MAV5) F24O1.4, partial (27%)	SGN-U286258
MICRO.9692.C1	1.10853	0.812448	0.85381	1.84773	0.715355	2.43801	1.247	Group VI	ABE87636	Response regulator receiver [Medicago truncatula]	TC141692	similar to UP|Q2HWG5_ORYSA (Q2HWG5) TypeA response regulator 10, partial (57%)	SGN-U274598
MICRO.9687.C1	0.441537	1.32832	0.933909	0.807723	0.540555	3.07845	1.215	Group II	NP_197229	unknown protein [Arabidopsis thaliana]	TC149685		SGN-U282817
MICRO.967.C1	1.01081	0.470108	0.963858	0.868859	0.847088	0.914751	0.597112	Group V	P93218	Polygalacturonase non-catalytic subunit AroGP3 precursor	TC148598	similar to UP|GP3_LYCES (P93218) Polygalacturonase non-catalytic subunit AroGP3 precursor, partial (53%)	SGN-U269942
MICRO.9630.C1	0.839589	0.462636	2.08215	1.99771	1.26747	1.31796	1.32454	Group VI	BAC07504	receptor-like protein kinase [Nicotiana tabacum]	TC140298	similar to UP|Q8LP72_TOBAC (Q8LP72) Receptor-like protein kinase, partial (49%)	SGN-U276202
MICRO.9625.C1	0.778073	1.01543	0.955119	0.507607	0.390361	4.07102	0.707558	Group II	AAV48823	cyclophilin 1; CyP1 [Codonopsis lanceolata]	TC137591	similar to UP|Q5U8V7_9ASTR (Q5U8V7) Cyclophilin 1, complete	SGN-U276957
MICRO.9602.C1	0.589676	1.06517	1.0015	0.874737	0.432538	0.59326	1.13334	Group III	NA	NA	TC151861		SGN-U280136
MICRO.960.C1	0.595944	1.19104	0.71814	1.01003	0.905242	0.275145	0.470697	Group V	NP_001053070	Os04g0474800 [Oryza sativa (japonica cultivar-group)]	TC142325	weakly similar to UP|Q9M5X5_PRUSE (Q9M5X5) Prunasin hydrolase isoform PHA precursor , partial (24%)	SGN-U269845
MICRO.9577.C1	1.40737	0.554884	1.06535	0.683551	2.35517	2.1777	2.43518	Group I	NP_201308	unknown protein [Arabidopsis thaliana]	TC139287		SGN-U275291
MICRO.9536.C1	1.51571	0.942637	0.978242	0.976463	0.819641	2.1013	1.07781	Group I	AAL83819	unknown [Petunia x hybrida]	TC139687	weakly similar to UP|Q67890_HBV (Q67890) HBV surface proteins, partial (5%)	SGN-U274734
MICRO.9533.C2	0.643549	0.979832	0.95953	0.967724	1.01989	0.5907	1.06282	Group III	NA	NA	TC146791		SGN-U275935
MICRO.9505.C3	0.262808	0.520865	1.22657	1.32514	1.44314	1.55186	1.12686	Group III	NP_173706	unknown protein [Arabidopsis thaliana]	TC161464	weakly similar to UP|Q7XQH1_ORYSA (Q7XQH1) OJ000114_01.6 protein, partial (17%)	SGN-U293433
MICRO.9474.C1	1.02655	0.573363	0.994965	1.28211	1.21561	0.572842	1.40981	Group IV	ABD96834	hypothetical protein [Cleome spinosa]	TC153245	similar to UP|Q69F97_PHAVU (Q69F97) Phytochelatin synthetase-like protein, partial (18%)	SGN-U280124
MICRO.9440.C2	0.839421	1.11995	1.04375	1.30113	1.37371	0.355885	0.558418	Group V	BAA11766	high mobility group protein [Canavalia gladiata]	TC134435	weakly similar to UP|HMGYB_SOYBN (Q10370) HMG-Y-related protein B (SB16B protein) (Fragment), partial (74%)	SGN-U273937
MICRO.9429.C3	1.50418	0.76126	1.64783	1.20034	1.1729	2.39515	1.17357	Group I	NA	NA	TC156752		SGN-U288862
MICRO.9423.C1	1.40919	0.709435	1.31007	0.911801	1.80457	0.5919	0.570484	Group IV	AAM13860	unknown protein [Arabidopsis thaliana]	TC153775		SGN-U281422
MICRO.9372.C2	0.49977	0.909044	1.05599	0.645745	0.599447	1.72033	0.860958	Group II	BAE98912	hypothetical protein [Arabidopsis thaliana]	TC138312	similar to UP|Q9LHH9_ARATH (Q9LHH9) Protein arginine N-methyltransferase 3-like protein, partial (27%)	SGN-U282852
MICRO.9354.C1	0.545546	1.18116	0.867386	1.01094	0.94829	0.647864	1.08407	Group III	ABE93092	Protein of unknown function DUF565 [Medicago truncatula]	TC144243	similar to UP|Q6EN61_ORYSA (Q6EN61) Antigen receptor-like protein, partial (28%)	SGN-U274385
MICRO.9336.C1	1.24557	1.19118	1.62382	1.71228	1.20913	2.71056	0.622332	Group VI	BAB16427	NtEIG-E80 [Nicotiana tabacum]	TC157977	similar to UP|Q9FXS6_TOBAC (Q9FXS6) NtEIG-E80 protein, partial (87%)	SGN-U281727
MICRO.9329.C1	1.3403	1.35096	0.997885	0.954971	0.501204	0.622556	1.05931	Group V	NP_175268	structural constituent of ribosome [Arabidopsis thaliana]	TC153314	similar to UP|RK18_ARATH (Q9SX68) 50S ribosomal protein L18, chloroplast precursor, partial (74%)	SGN-U277745
MICRO.9326.C1	0.913024	0.860503	1.83371	1.72821	0.979952	1.51989	1.05019	Group VI	NP_189143	RIN4 (RPM1 INTERACTING PROTEIN 4) [Arabidopsis thaliana]	TC138236	weakly similar to UP|RIN4_ARATH (Q8GYN5) RPM1-interacting protein 4, partial (39%)	SGN-U278478
MICRO.9292.C1	0.546389	0.632827	1.14142	0.92615	1.17072	0.859681	1.19217	Group IV	AAS78640	MAP3Ka [Lycopersicon esculentum]	TC134902	homologue to UP|Q6RFY3_LYCES (Q6RFY3) MAP3Ka, complete	SGN-U275598
MICRO.929.C1	0.569567	0.719864	1.05688	0.976129	1.07489	0.575357	0.938678	Group III	Q9M4G4	Phosphoglucomutase, cytoplasmic (Glucose phosphomutase) (PGM)	TC140340	UP|PGMC_SOLTU (Q9M4G4) Phosphoglucomutase, cytoplasmic (Glucose phosphomutase) (PGM) , complete	SGN-U273904
MICRO.9279.C2	0.96028	1.48269	1.59318	0.52159	1.54899	0.3837	1.20037	Group IV	ABC69274	putative DnaJ protein [Camellia sinensis]	CV505817		SGN-U274360
MICRO.9279.C1	0.935681	0.719519	1.62796	0.459375	1.98186	0.349428	1.29015	Group IV	ABC69274	putative DnaJ protein [Camellia sinensis]	TC156816	similar to UP|DNAJ8_ARATH (Q9SAG8) Chaperone protein dnaJ 8, chloroplast precursor (AtJ8) (AtDjC8), partial (60%)	SGN-U274360
MICRO.927.C1	0.875151	0.926945	1.06767	1.75018	3.33213	0.975103	1.11371	Group VII	NP_193878	catalytic/ hydrolase/ riboflavin kinase [Arabidopsis thaliana]	TC141271	similar to UP|Q84MD8_ARATH (Q84MD8) At4g21470 (Riboflavin kinase/FMN hydrolase), partial (82%)	SGN-U272148
MICRO.9257.C2	1.62809	1.35631	0.964465	0.88223	0.875945	1.88331	0.937784	Group I	ABE79302	Gastric cancer antigen Zg14, related [Medicago truncatula]	TC140454	similar to UP|Q9FKR4_ARATH (Q9FKR4) Emb|CAB41546.1|, partial (34%)	SGN-U278745
MICRO.9248.C1	0.892207	1.24228	0.997602	1.55423	1.94432	1.62354	0.783205	Group VII	AAM67325	unknown [Arabidopsis thaliana]	TC146975	similar to UP|PMGY_SCHPO (P36623) Phosphoglycerate mutase (Phosphoglyceromutase) (PGAM) (MPGM) (BPG-dependent PGAM) , partial (24%)	SGN-U280702
MICRO.9243.C2	2.37233	0.624778	0.573511	0.829847	1.10087	1.16049	0.991203	Group I	NA	NA	TC151774	weakly similar to UP|Q8H5A4_ORYSA (Q8H5A4) Early nodulin 75-like protein, partial (54%)	SGN-U278913
MICRO.9242.C1	1.03845	0.870012	0.99534	2.03467	8.39685	9.94251	3.31525	Group I	EAY91207	hypothetical protein OsI_012440 [Oryza sativa (indica cultivar-group)]	TC162173	similar to GB|CAA74049.1|2398523|ATHAP2B Transcription factor {Arabidopsis thaliana} (exp=-1; wgp=0; cg=0), partial (11%)	SGN-U290589
MICRO.9235.C1	0.679772	0.235917	1.10745	1.15255	1.16072	0.474883	1.201	Group IV	NP_195813	hydrolase, hydrolyzing O-glycosyl compounds [Arabidopsis thaliana]	TC141505	similar to UP|Q9LZV3_ARATH (Q9LZV3) (1-4)-beta-mannan endohydrolase-like protein (At5g01930), partial (41%)	SGN-U283067
MICRO.9226.C3	1.28705	0.866177	2.19425	2.66278	1.16833	1.66148	1.51535	Group VI	ABO80090	Leucine-rich repeat [Medicago truncatula]	TC155142	weakly similar to UP|Q8W4T6_SOLTU (Q8W4T6) Ve resistance gene analog (Fragment), partial (39%)	SGN-U271637
MICRO.9226.C2	1.26145	0.908859	1.91213	1.9492	1.17722	1.96116	1.30299	Group VI	AAV33689	Hcr9-OR2A [Lycopersicon pimpinellifolium]	TC158159	weakly similar to UP|Q9ZS81_LYCES (Q9ZS81) NL0E, partial (17%)	SGN-U271636
MICRO.921.C1	1.13089	0.763351	1.68662	1.77159	1.03457	0.929062	0.746742	Group VII	AAK58515	beta-1,3-glucanase-like protein [Olea europaea]	TC137400	similar to UP|Q94G86_OLEEU (Q94G86) Beta-1,3-glucanase-like protein, partial (91%)	SGN-U272678
MICRO.9207.C1	1.37077	0.644589	1.1141	0.424509	1.02558	1.11551	0.751081	Group I	BAC81649	glutathione S-transferase [Pisum sativum]	TC154519	similar to UP|Q76KW1_PEA (Q76KW1) Glutathione S-transferase, partial (95%)	SGN-U271995
MICRO.917.C1	0.407085	0.648766	0.912206	1.05424	0.900001	0.833112	1.13779	Group III	NP_172919	transporter [Arabidopsis thaliana]	TC142984	similar to UP|Q9FHT4_ARATH (Q9FHT4) Endosomal protein-like, partial (43%)	SGN-U272019
MICRO.9159.C1	0.338003	0.79231	0.97227	1.35722	1.51821	0.247756	1.04648	Group III	ABE83067	SPX, N-terminal; Major facilitator superfamily MFS_1 [Medicago truncatula]	TC162246	homologue to UP|Q93ZQ5_ARATH (Q93ZQ5) AT4g22990/F7H19_170, partial (4%)	SGN-U274276
MICRO.9157.C1	1.28372	0.830321	1.1276	1.18988	1.04706	1.70919	1.77664	Group I	ABE81356	Uncharacterised protein family containing protein [Medicago truncatula]	TC142257	weakly similar to UP|Q9FK03_ARATH (Q9FK03) Emb|CAB66399.1, partial (9%)	SGN-U284267
MICRO.911.C2	0.8272	1.15761	1.03688	0.631285	0.562676	2.84445	0.883277	Group II	NA	NA	TC140250	similar to UP|Q651Z0_ORYSA (Q651Z0) RNA-binding protein-like, partial (7%)	SGN-U274611
MICRO.9090.C4	0.779579	1.15969	1.11041	0.943452	1.72724	0.827932	2.85268	Group IV	ABI34703	DnaJ-like protein isoform [Solanum phureja]	TC161452	similar to UP|Q8GSQ2_SOYBN (Q8GSQ2) Heat shock protein DnaJ (Fragment), partial (82%)	SGN-U271864
MICRO.9090.C2	0.793319	1.21461	1.10113	1.22129	1.91692	1.32087	3.55994	Group IV	NA	NA	TC158750		SGN-U271863
MICRO.9070.C1	0.536357	0.61468	0.920552	1.03182	0.88943	0.794126	1.36992	Group III	NP_199564	dopamine beta-monooxygenase [Arabidopsis thaliana]	TC144771	similar to UP|Q8VYH6_ARATH (Q8VYH6) AT4g17280/dl4675c, partial (24%)	SGN-U277139
MICRO.9064.C4	0.982624	0.44938	1.26113	0.55151	0.689974	1.78754	0.746858	Group I	CAD29291	alcohol NADP+ oxidoreductase [Solanum tuberosum]	TC137930	UP|Q8H0L8_SOLTU (Q8H0L8) Alcohol NADP+ oxidoreductase, complete	SGN-U272530
MICRO.9061.C3	1.92838	2.0831	0.938004	6.68862	1.27001	0.78084	1.28822	Group VIII	NP_568152	unknown protein [Arabidopsis thaliana]	TC144483	similar to UP|Q9FLC9_ARATH (Q9FLC9) Arabidopsis thaliana genomic DNA, chromosome 5, TAC clone:K18I23 (AT5g05250/K18I23_5), partial (21%)	SGN-U273558
MICRO.9061.C1	1.9968	2.10149	0.844633	7.66113	1.07512	1.12714	1.10752	Group VIII	NP_568152	unknown protein [Arabidopsis thaliana]	TC144483	similar to UP|Q9FLC9_ARATH (Q9FLC9) Arabidopsis thaliana genomic DNA, chromosome 5, TAC clone:K18I23 (AT5g05250/K18I23_5), partial (21%)	SGN-U273558
MICRO.9043.C1	1.12287	1.33463	1.04288	1.51514	6.45956	0.405742	1.15944	Group VII	NP_195300	unknown protein [Arabidopsis thaliana]	TC136086	weakly similar to GB|AAP37803.1|30725562|BT008444 At4g35750 {Arabidopsis thaliana} (exp=-1; wgp=0; cg=0), partial (53%)	SGN-U275216
MICRO.9032.C1	0.919465	1.30049	0.903281	0.647137	0.585109	1.01632	1.11183	Group II	NP_683545	unknown protein [Arabidopsis thaliana]	TC162393		SGN-U285144
MICRO.8989.C1	0.94389	1.28154	1.0713	1.02869	0.656167	0.702864	0.660308	Group V	NP_173002	hydrolase [Arabidopsis thaliana]	TC142198	similar to RF|NP_173002.1|15218212|NM_101418 hydrolase {Arabidopsis thaliana} (exp=-1; wgp=0; cg=0), partial (41%)	SGN-U278297
MICRO.8987.C2	0.380961	1.00433	1.12277	1.5051	2.37079	1.55887	0.652893	Group III	YP_588403	hypothetical protein ZeamMp158 [Zea mays subsp. mays]	TC159917	gb|U82638.1|NTU82638 Nicotiana tabacum small subunit ribosomal RNA gene, mitochondrial gene for mitochondrial RNA, complete sequence, partial (94%)	SGN-U280080
MICRO.8958.C1	0.883932	1.24308	0.75163	0.705163	1.59294	1.22011	2.59751	Group IV	NP_198901	UPM1 (UROPHORPHYRIN METHYLASE 1); methyltransferase/ uroporphyrin-III C-methyltransferase [Arabidopsis thaliana]	TC156692	similar to UP|Q42606_ARATH (Q42606) Urophorphyrin III methylase (AT5g40850/MHK7_8) , partial (73%)	SGN-U290986
MICRO.8947.C1	0.621976	0.734743	1.42315	0.600352	1.1807	0.685722	0.546628	Group IV	ABC69402	CYP71D5v2 [Nicotiana tabacum]	TC144254	weakly similar to UP|Q8H0I3_PETHY (Q8H0I3) Cytochrome P450, partial (33%)	SGN-U281719
MICRO.8918.C3	1.83528	0.749811	1.81141	2.56819	1.72505	3.15159	1.02292	Group VI	AAK30143	pathogenesis-related protein PR-1 precursor [Capsicum annuum]	TC139057	homologue to UP|O65157_CAPAN (O65157) Basic PR-1 protein precursor (Pathogenesis-related protein PR-1), complete	SGN-U269642
MICRO.8918.C2	1.15826	1.03852	6.1212	7.09593	1.74356	0.813165	0.711331	Group VII	AAK30143	pathogenesis-related protein PR-1 precursor [Capsicum annuum]	TC139537	homologue to UP|Q04106_TOBAC (Q04106) Prb-1b, partial (94%)	SGN-U269643
MICRO.8918.C1	1.0606	1.1072	5.88152	8.35508	2.16188	1.36017	0.662548	Group VII	AAK30143	pathogenesis-related protein PR-1 precursor [Capsicum annuum]	TC139057	homologue to UP|O65157_CAPAN (O65157) Basic PR-1 protein precursor (Pathogenesis-related protein PR-1), complete	SGN-U269642
MICRO.8852.C1	0.534826	1.05554	0.874181	1.66938	1.86886	0.596316	1.00762	Group VII	ABD28429	Regulator of chromosome condensation/beta-lactamase-inhibitor protein II [Medicago truncatula]	DN941203		SGN-U275902
MICRO.8814.C1	1.35898	0.997845	0.941067	1.12828	0.77266	2.84374	1.5867	Group I	BAE48709	ZIP family metal transporter [Chengiopanax sciadophylloides]	TC140857	similar to UP|Q2Z1Q1_ACASA (Q2Z1Q1) ZIP family metal transporter, partial (89%)	SGN-U280203
MICRO.8799.C2	1.08359	1.23513	0.68495	0.99666	0.304722	0.341798	0.479564	Group V	BAF46299	extensin like protein [Ipomoea nil]	TC137610	weakly similar to UP|Q9S7U3_ARATH (Q9S7U3) PEARLI 1-like protein (At4g12520), partial (84%)	SGN-U272649
MICRO.8799.C1	1.13528	1.50777	0.782214	0.967573	0.339338	0.592802	0.667775	Group V	BAF46299	extensin like protein [Ipomoea nil]	TC137610	weakly similar to UP|Q9S7U3_ARATH (Q9S7U3) PEARLI 1-like protein (At4g12520), partial (84%)	SGN-U272649
MICRO.8793.C1	0.829815	0.72913	0.961106	0.646422	0.638164	1.14921	2.18174	Group III	Q9XGI7	Nicotianamine synthase (S-adenosyl-L-methionine:S-adenosyl-L-methionine:S- adenosyl-methionine 3-amino-3-carboxypropyltransferase) (Chloronerva)	TC151217	homologue to UP|NAS_LYCES (Q9XGI7) Nicotianamine synthase (S-adenosyl-L-methionine:S-adenosyl-L-methionine:S- adenosyl-methionine 3-amino-3-carboxypropyltransferase) (Chloronerva) , partial (53%)	SGN-U275494
MICRO.8770.C1	1.58924	0.799429	0.660222	11.6216	0.824487	0.0881195	1.15172	Group VIII	NA	NA	TC148590	similar to GB|AAP37795.1|30725546|BT008436 At1g47390 {Arabidopsis thaliana} (exp=-1; wgp=0; cg=0), partial (28%)	SGN-U281532
MICRO.8715.C1	1.30233	0.969187	0.99783	0.940038	1.30314	0.649971	0.600354	Group V	P93217	Polygalacturonase non-catalytic subunit AroGP2 precursor	TC149711	homologue to UP|GP2_LYCES (P93217) Polygalacturonase non-catalytic subunit AroGP2 precursor, partial (30%)	SGN-U272684
MICRO.8713.C2	1.46403	1.26572	0.79822	0.564522	0.829888	0.611111	0.424079	Group V	CAA93316	nitrite transporter [Cucumis sativus]	TC139722	similar to UP|Q96400_CUCSA (Q96400) Nitrite transporter, partial (69%)	SGN-U270974
MICRO.8655.C1	1.30106	1.71677	0.992773	0.929765	0.825689	1.60726	0.889992	Group I	NA	NA	BQ519413		SGN-U276476
MICRO.8633.C1	0.659503	1.35944	0.961234	1.09223	0.453061	1.74368	0.995842	Group II	EAZ32676	hypothetical protein OsJ_016159 [Oryza sativa (japonica cultivar-group)]	TC138759	weakly similar to RF|NP_181986.1|15224911|NM_130022 protein binding {Arabidopsis thaliana} (exp=-1; wgp=0; cg=0), partial (15%)	SGN-U280219
MICRO.8630.C2	1.27495	1.32143	0.974992	0.750271	0.548802	0.565713	1.04473	Group V	NA	NA	TC162668	similar to GB|AAK32820.1|13605653|AF361807 AT3g15190/F4B12_10 {Arabidopsis thaliana} (exp=-1; wgp=0; cg=0), partial (29%)	SGN-U270370
MICRO.8616.C2	0.606066	0.724405	1.60479	1.81881	1.12793	1.32815	1.15833	Group VI	ABN69037	protein kinase [Solanum tuberosum]	TC153317	homologue to UP|Q1W0X1_TOBAC (Q1W0X1) Serine/threonine kinase (Fragment), partial (87%)	SGN-U270964
MICRO.861.C3	0.91554	0.369626	1.0567	0.677807	0.671217	3.76014	2.33638	Group I	NP_566715	HMT3; homocysteine S-methyltransferase [Arabidopsis thaliana]	TC142316	similar to UP|HMT3_ARATH (Q8LAX0) Homocysteine S-methyltransferase 3 (S-methylmethionine:homocysteine methyltransferase 3) (SMM:Hcy S-methyltransferase 3) (AtHMT-3) , partial (53%)	SGN-U296910
MICRO.8586.C2	0.461705	0.942155	1.5289	0.71855	1.14636	2.24624	0.959828	Group I	NA	NA	TC156259	similar to RF|NP_506794.2|72001598|NM_074393 Serpentine Receptor, class Z family member (srz-10) {Caenorhabditis elegans} (exp=-1; wgp=0; cg=0), partial (5%)	SGN-U274514
MICRO.8568.C2	0.52405	0.880636	0.854542	0.91019	0.576459	0.247888	0.656408	Group V	NP_001047539	Os02g0639500 [Oryza sativa (japonica cultivar-group)]	TC160708	similar to UP|EXPB3_ARATH (Q9M0I2) Beta-expansin 3 precursor (AtEXPB3) (At-EXPB3) (Ath-ExpBeta-1.6), partial (83%)	SGN-U292517
MICRO.8565.C1	1.07968	1.15203	0.892166	0.728523	1.50634	0.588843	1.72671	Group V	BAD15365	nitrite reductase [Nicotiana tabacum]	TC144228	homologue to UP|Q76G13_TOBAC (Q76G13) Nitrite reductase , partial (86%)	SGN-U271504
MICRO.8544.C3	1.57144	0.749523	1.88807	0.757106	1.48915	0.610051	0.76469	Group IV	ABC69274	putative DnaJ protein [Camellia sinensis]	TC149290	similar to UP|DNAJ8_ARATH (Q9SAG8) Chaperone protein dnaJ 8, chloroplast precursor (AtJ8) (AtDjC8), partial (45%)	SGN-U273767
MICRO.8544.C2	1.20468	0.846648	2.34869	0.402859	1.76849	0.495078	0.82351	Group IV	ABC69274	putative DnaJ protein [Camellia sinensis]	TC138512	similar to UP|DNAJ8_ARATH (Q9SAG8) Chaperone protein dnaJ 8, chloroplast precursor (AtJ8) (AtDjC8), partial (58%)	SGN-U273767
MICRO.854.C2	1.78325	0.404054	1.27326	0.413869	9.38088	5.58891	0.0749044	Group I	P31427	Leucine aminopeptidase, chloroplast precursor (LAP) (Leucyl aminopeptidase) (Proline aminopeptidase) (Prolyl aminopeptidase)	TC132802	homologue to UP|AMPL_SOLTU (P31427) Leucine aminopeptidase, chloroplast precursor (LAP) (Leucyl aminopeptidase) (Proline aminopeptidase) (Prolyl aminopeptidase) , complete	SGN-U268586
MICRO.847.C1	1.5396	0.95969	1.02319	1.02013	1.68377	0.7789	1.13716	Group I	NP_201289	ATGCN5 [Arabidopsis thaliana]	TC148883	similar to UP|Q93ZN6_ARATH (Q93ZN6) AT5g64840/MXK3_6, partial (65%)	SGN-U272982
MICRO.8445.C2	1.22822	1.06902	2.08747	1.05475	1.41298	1.76576	0.914325	Group I	NP_200466	unknown protein [Arabidopsis thaliana]	TC139334	weakly similar to UP|Q94JH8_ORYSA (Q94JH8) Cold induced protein-like, partial (27%)	SGN-U271405
MICRO.8444.C3	1.88617	0.83115	2.38155	4.24625	1.43592	2.6929	1.43872	Group VI	NP_001057363	Os06g0272000 [Oryza sativa (japonica cultivar-group)]	BQ515432		SGN-U273890
MICRO.8441.C1	1.01546	0.202383	0.977577	1.16196	0.882311	0.626757	1.52563	Group IV	NP_566687	unknown protein [Arabidopsis thaliana]	TC143754	weakly similar to UP|Q9LVF1_ARATH (Q9LVF1) Emb|CAB45066.1 (AT3g21550/MIL23_11), partial (79%)	SGN-U276299
MICRO.844.C1	0.722648	0.769899	1.4898	0.788396	2.04705	0.381569	0.619717	Group IV	NP_179571	nucleic acid binding / transcription factor [Arabidopsis thaliana]	TC134660	similar to RF|NP_179571.1|15224852|NM_127539 nucleic acid binding {Arabidopsis thaliana} (exp=-1; wgp=0; cg=0), partial (47%)	SGN-U272157
MICRO.8437.C3	1.03111	0.693018	1.11695	0.753078	0.306534	1.08253	0.450544	Group V	BAB16428	P-rich protein EIG-I30 [Nicotiana tabacum]	DN589699		SGN-U269818
MICRO.8437.C1	0.574578	0.923666	0.964965	0.964569	0.435696	0.828727	0.892861	Group III	BAB16428	P-rich protein EIG-I30 [Nicotiana tabacum]	TC152950	similar to UP|Q9FXS5_TOBAC (Q9FXS5) P-rich protein EIG-I30, partial (95%)	SGN-U269818
MICRO.8427.C2	0.607201	0.965071	0.79731	0.999731	0.678994	0.324938	1.18928	Group V	NA	NA	TC134162	homologue to UP|Q7XJI7_LYCES (Q7XJI7) Glycine-rich protein TomR2, partial (83%)	SGN-U271812
MICRO.8414.C1	1.3024	2.29906	1.25884	1.35199	0.664246	0.442894	0.543376	Group V	NP_564572	UBC20; ubiquitin conjugating enzyme [Arabidopsis thaliana]	TC136424	homologue to UP|Q8L7T3_ARATH (Q8L7T3) Ubiquitin-conjugating enzyme (At1g50490) (Ubiquitinating enzyme), partial (83%)	SGN-U275776
MICRO.8403.C2	1.40036	0.59188	1.80095	2.40477	1.19774	1.99016	1.50858	Group VI	NA	NA	TC143033	homologue to UP|PTI6_LYCES (O04682) Pathogenesis-related genes transcriptional activator PTI6 (PTO-interacting protein 6), complete	SGN-U269253
MICRO.8403.C1	0.625888	0.51444	1.77036	2.34459	1.31268	1.85976	1.43654	Group VI	O04682	Pathogenesis-related genes transcriptional activator PTI6 (PTO-interacting protein 6)	TC143033	homologue to UP|PTI6_LYCES (O04682) Pathogenesis-related genes transcriptional activator PTI6 (PTO-interacting protein 6), complete	SGN-U269253
MICRO.8393.C1	0.663853	1.09353	1.13344	1.85751	3.00898	0.695592	1.29901	Group VII	AAD49976	F24J5.9 [Arabidopsis thaliana]	TC137524	similar to UP|Q9SX30_ARATH (Q9SX30) F24J5.9, partial (43%)	SGN-U280300
MICRO.839.C6	2.42975	0.476321	0.656927	0.626062	3.42137	5.34444	0.0748993	Group I	AAF15901	putative proteinase inhibitor [Nicotiana glutinosa]	TC137741	similar to UP|Q8S500_9ROSI (Q8S500) Trypsin inhibitor (Fragment), partial (14%)	SGN-U268102
MICRO.839.C13	1.78829	0.584983	1.00397	0.485193	1.53371	2.79474	0.150903	Group I	AAF15901	putative proteinase inhibitor [Nicotiana glutinosa]	CX161735		SGN-U286651
MICRO.8376.C2	1.50562	0.594218	1.086	1.46108	16.6798	1.53335	1.22158	Group VII	CAD30862	putative phosphatase [Solanum lycopersicum]	TC153190	similar to RF|NP_565052.1|18410243|NM_105959 phosphoric monoester hydrolase {Arabidopsis thaliana} (exp=-1; wgp=0; cg=0), partial (78%)	SGN-U278474
MICRO.8369.C3	0.837951	0.945647	1.81077	0.847976	1.52844	4.27378	0.940685	Group I	NP_181966	unknown protein [Arabidopsis thaliana]	TC143401	similar to UP|Q6II46_DROME (Q6II46) HDC19720, partial (9%)	SGN-U271230
MICRO.8369.C2	1.42212	0.966813	1.87958	0.883882	1.57424	4.71457	0.960554	Group I	NP_181966	unknown protein [Arabidopsis thaliana]	TC141785		SGN-U271231
MICRO.8360.C1	0.641455	0.980629	0.899689	0.884409	0.795266	0.517283	1.05217	Group V	NP_568233	unknown protein [Arabidopsis thaliana]	TC146784	similar to UP|Q69MJ7_ORYSA (Q69MJ7) Pentatricopeptide (PPR) repeat-containing protein / CBS domain-containing protein-like, partial (24%)	SGN-U285487
MICRO.835.C1	2.23048	0.920594	1.19435	1.64478	2.70066	0.81702	0.796013	Group I	BAD94624	hypothetical protein [Arabidopsis thaliana]	CV506212		SGN-U297157
MICRO.8340.C1	1.00661	0.970566	0.90508	1.77172	3.25418	1.47716	1.0136	Group I	ABN09063	Major facilitator superfamily [Medicago truncatula]	TC134250	similar to GB|AAR23714.1|38564270|BT010744 At3g20660 {Arabidopsis thaliana} (exp=-1; wgp=0; cg=0), partial (47%)	SGN-U284258
MICRO.8328.C1	1.24286	0.817464	1.00192	0.729932	1.92458	2.08242	0.455901	Group I	NP_189361	unknown protein [Arabidopsis thaliana]	TC140383	weakly similar to UP|Q9FKS6_ARATH (Q9FKS6) Emb|CAB62340.1, partial (43%)	SGN-U275404
MICRO.8323.C1	1.11173	0.826747	1.05315	0.534455	1.58255	1.13362	0.460644	Group I	NP_187498	alanine-glyoxylate transaminase/ pyridoxal phosphate binding / transaminase [Arabidopsis thaliana]	TC140045	similar to UP|AGT23_ARATH (Q9SR86) Alanine--glyoxylate aminotransferase 2 homolog 3, mitochondrial precursor (Beta-alanine-pyruvate aminotransferase 3) , partial (90%)	SGN-U272343
MICRO.8286.C1	1.11006	0.924597	1.86772	1.96216	1.21408	0.955502	0.994246	Group VII	NA	NA	TC161161		SGN-U284518
MICRO.8285.C1	0.594332	0.5976	1.13499	0.929754	0.889558	0.872268	1.18279	Group III	ABK51386	apyrase-like protein [Nicotiana tabacum]	TC142822	similar to UP|Q84UD8_MEDTR (Q84UD8) Apyrase-like protein, partial (83%)	SGN-U298045
MICRO.8232.C1	0.592619	0.741945	0.897846	1.03189	1.22532	0.56897	1.1152	Group III	NP_568923	protein binding / ubiquitin-protein ligase/ zinc ion binding [Arabidopsis thaliana]	TC142286	weakly similar to UP|Q9ASR2_ARATH (Q9ASR2) AT5g60580/muf9_230, partial (5%)	SGN-U281671
MICRO.8213.C1	0.327912	0.631909	1.07405	1.09651	1.05222	0.902615	0.996636	Group III	BAD00984	ubiquitin activating enzyme 2 [Nicotiana tabacum]	TC138187	similar to UP|Q75VJ8_TOBAC (Q75VJ8) Ubiquitin activating enzyme 2, partial (21%)	SGN-U286117
MICRO.821.C1	0.631218	1.07074	0.849572	0.749047	0.524697	3.10703	0.913295	Group II	NP_001043185	Os01g0513800 [Oryza sativa (japonica cultivar-group)]	TC152350	similar to UP|BXDC1_ARATH (Q9LUG5) Brix domain-containing protein 1 homolog, partial (86%)	SGN-U274379
MICRO.8206.C1	0.279999	0.617413	0.968517	1.18991	1.03243	0.902859	1.12525	Group III	NP_001048399	Os02g0797700 [Oryza sativa (japonica cultivar-group)]	TC140522	similar to UP|Q9FYQ8_ARATH (Q9FYQ8) Endosomal protein-like, partial (39%)	SGN-U274870
MICRO.8190.C1	0.493477	0.785108	0.95534	0.589174	0.543803	1.73439	1.02295	Group II	NP_566792	DNA binding / N-methyltransferase [Arabidopsis thaliana]	TC138909	weakly similar to UP|Q6ZI84_ORYSA (Q6ZI84) RNA methylase-like protein, partial (57%)	SGN-U274732
MICRO.8187.C1	0.510179	0.582872	1.3447	1.38534	1.08485	1.04842	1.40014	Group III	NP_198719	kinase [Arabidopsis thaliana]	TC136692	similar to UP|Q9FID5_ARATH (Q9FID5) Receptor protein kinase-like protein, partial (9%)	SGN-U274401
MICRO.8144.C1	0.514438	1.53528	0.847643	1.12668	0.977424	0.490287	0.989311	Group III	AAK91129	KRP120-2 [Daucus carota]	TC160590	similar to UP|Q94G20_DAUCA (Q94G20) KRP120-2, partial (40%)	SGN-U284705
MICRO.8143.C1	1.24285	0.449996	1.44515	0.687183	1.12785	4.78217	0.645849	Group I	ABN07990	SAM (and some other nucleotide) binding motif [Medicago truncatula]	TC142778	weakly similar to GB|AAP13415.1|30023764|BT006307 At2g41380 {Arabidopsis thaliana} (exp=-1; wgp=0; cg=0), partial (80%)	SGN-U273128
MICRO.8120.C1	1.28307	1.22767	1.01667	0.763987	0.627053	0.607281	1.11708	Group V	P82403	30S ribosomal protein S6 alpha, chloroplast precursor [Contains: 30S ribosomal protein S6 beta; 30S ribosomal protein S6 gamma; 30S ribosomal protein S6 delta; 30S ribosomal protein S6 epsilon]	TC159422	similar to UP|P82403_SPIOL (P82403) 30S ribosomal protein S6, chloroplast precursor (Fragment), partial (88%)	SGN-U272845
MICRO.8109.C1	0.362539	0.655963	0.818633	1.14343	0.952987	0.970109	1.24759	Group III	NA	NA	TC145296	similar to UP|Q5PMT5_SALPA (Q5PMT5) Sensor protein, partial (5%)	SGN-U284446
MICRO.8088.C1	0.350532	1.10117	1.13464	1.36215	0.824601	0.925676	0.630884	Group III	ABE91887	hypothetical protein MtrDRAFT_AC144806g20v2 [Medicago truncatula]	TC140325		SGN-U284757
MICRO.8076.C4	0.36031	1.12365	0.932066	1.14536	0.95836	0.884732	0.636785	Group III	CAA64559	Tfm5 [Solanum lycopersicum]	CN215322		SGN-U284521
MICRO.8061.C1	1.09366	1.13881	0.880821	0.928803	0.509668	0.400051	1.05538	Group V	AAR86718	glutamine synthetase GS56 [Nicotiana attenuata]	TC135279	homologue to UP|Q5QJ64_9SOLA (Q5QJ64) Glutamine synthetase GS56, complete	SGN-U269335
MICRO.8044.C1	1.96238	0.760687	4.21974	1.78786	0.629491	0.60869	1.52531	Group VI	BAD13296	putative ATPase [Nicotiana tabacum]	CN212572		SGN-U275805
MICRO.7931.C1	0.281703	1.052	1.35608	1.50502	1.30338	1.07147	0.638449	Group III	NA	NA	TC144964		SGN-U286430
MICRO.7911.C1	1.95533	0.774976	0.833273	1.84096	1.10951	1.74043	1.56581	Group I	ABD93543	DNA-binding protein [Nicotiana tomentosiformis]	TC141128	UP|Q1W7D9_SOLTU (Q1W7D9) DNA-binding protein (Fragment), complete	SGN-U272479
MICRO.7905.C1	0.812827	1.10971	0.833624	0.547931	0.38163	2.6186	0.953526	Group II	ABE26599	Zinc finger, RanBP2-type [Medicago truncatula]	BF459902		SGN-U283029
MICRO.7901.C1	0.570542	1.09915	0.916866	0.980428	0.59157	1.67198	0.862697	Group II	BAD34057	putative Peptidyl Prolyl cis-trans isomerase [Oryza sativa (japonica cultivar-group)]	TC161557	weakly similar to UP|Q7XUX5_ORYSA (Q7XUX5) Peptidyl-prolyl cis-trans isomerase, partial (10%)	SGN-U285736
MICRO.789.C1	1.12759	0.937289	1.72926	2.05368	1.08009	9.26175	0.65702	Group I	AAR92477	putative WRKY transcription factor 30 [Vitis aestivalis]	TC162819	similar to RF|NP_849358.1|30681651|NM_179027 WRKY41; transcription factor {Arabidopsis thaliana} (exp=-1; wgp=0; cg=0), partial (31%)	SGN-U295039
MICRO.7884.C2	1.40722	0.728618	2.71579	3.09992	0.931197	1.88128	1.36983	Group VI	AAL57228	protein kinase-like protein [Capsicum annuum]	TC156341	homologue to UP|Q8W248_CAPAN (Q8W248) Protein kinase-like protein (Fragment), complete	SGN-U280417
MICRO.7882.C1	0.565256	0.86845	1.49274	1.17809	1.05158	1.62724	1.74248	Group III	AAY54606	NRG1 [Nicotiana benthamiana]	TC141075	similar to UP|Q4TVR0_NICBE (Q4TVR0) NRG1, partial (22%)	SGN-U276516
MICRO.7872.C1	0.476588	0.305172	1.40282	1.69111	1.1244	0.9856	1.57302	Group III	NP_193844	AAT1 (CATIONIC AMINO ACID TRANSPORTER 1); cationic amino acid transporter [Arabidopsis thaliana]	TC154319	similar to UP|Q84MA5_ARATH (Q84MA5) At4g21120, partial (26%)	SGN-U278306
MICRO.7848.C1	0.760903	1.02918	1.03482	0.73425	0.661586	3.31639	0.655209	Group II	CAA05629	membrane-associated salt-inducible protein like [Arabidopsis thaliana]	TC133348	weakly similar to UP|O23149_ARATH (O23149) Membrane-associated salt-inducible protein like (Fragment), partial (70%)	SGN-U285224
MICRO.7814.C1	1.72079	0.645999	1.09016	1.30721	1.54311	1.46085	0.963965	Group I	ABE89044	Conserved hypothetical protein 730 [Medicago truncatula]	TC140709	similar to UP|Q9ASW6_ARATH (Q9ASW6) T3B23.2/T3B23.2, partial (93%)	SGN-U270345
MICRO.7792.C1	0.768853	1.21382	0.869007	0.656719	0.508056	1.18826	0.828063	Group II	Q5YLB5	DNA gyrase subunit A, chloroplast/mitochondrial precursor	TC158192	homologue to UP|Q5YLB5_NICBE (Q5YLB5) DNA gyrase A subunit, partial (36%)	SGN-U284299
MICRO.7771.C2	0.918309	0.947861	1.69337	2.90155	2.41104	2.27628	0.777322	Group VI	ABG76000	GRP-like protein 2 [Gossypium hirsutum]	TC137325	homologue to UP|UPTG1_SOLTU (Q9SC19) Alpha-1,4-glucan-protein synthase [UDP-forming] 1 (UDP-glucose:protein transglucosylase 1) (UPTG 1) , partial (68%)	SGN-U273710
MICRO.7762.C1	1.12851	0.788974	1.52419	1.83006	1.05496	1.32235	1.42204	Group VI	EAZ13679	hypothetical protein OsJ_003504 [Oryza sativa (japonica cultivar-group)]	TC135875	similar to UP|Q8VZH5_CAPAN (Q8VZH5) Receptor protein kinase-like protein, partial (33%)	SGN-U272895
MICRO.772.C2	1.0331	1.08664	0.946512	0.553562	0.614919	2.18077	0.806732	Group II	NP_566559	RNA binding [Arabidopsis thaliana]	TC143521	weakly similar to UP|Q9LRZ3_ARATH (Q9LRZ3) Arabidopsis thaliana genomic DNA, chromosome 3, TAC clone:K20I9 (AT3g16810/K20I9_3), partial (69%)	SGN-U271518
MICRO.772.C1	0.5838	0.945048	0.992126	0.849226	0.623675	2.76298	0.871096	Group II	NP_566559	RNA binding [Arabidopsis thaliana]	TC143521	weakly similar to UP|Q9LRZ3_ARATH (Q9LRZ3) Arabidopsis thaliana genomic DNA, chromosome 3, TAC clone:K20I9 (AT3g16810/K20I9_3), partial (69%)	SGN-U271518
MICRO.7711.C1	0.886922	0.56732	1.72572	1.45223	1.21206	1.54457	0.95396	Group VI	BAA04838	ORF [Lilium longiflorum]	TC135426	similar to RF|NP_175198.1|15220283|NM_103660 amino acid permease {Arabidopsis thaliana} (exp=-1; wgp=0; cg=0), partial (39%)	SGN-U270906
MICRO.763.C1	1.26189	1.31648	0.881688	0.595141	0.591026	2.12393	0.913559	Group II	NP_178487	CR88; ATP binding / unfolded protein binding [Arabidopsis thaliana]	TC140623	similar to UP|Q8LPS0_ARATH (Q8LPS0) At2g04030/F3C11.14, partial (55%)	SGN-U279822
MICRO.760.C1	1.54585	0.708798	0.96698	1.12447	1.36721	1.59666	0.676569	Group I	BAE46411	hypothetical protein [Solanum tuberosum]	TC144125		SGN-U287583
MICRO.7594.C1	1.59216	0.804821	1.08785	1.00181	1.31619	8.72404	2.21136	Group I	CAC44012	snakin2 [Solanum tuberosum]	TC147682	UP|Q93X17_SOLTU (Q93X17) Snakin2 precursor, complete	SGN-U268852
MICRO.7562.C1	0.649751	0.686726	1.07453	1.11102	1.51167	1.55287	1.33358	Group I	NA	NA	TC144177		SGN-U277603
MICRO.7551.C1	1.28466	0.665554	1.0921	1.31507	3.53873	6.49474	1.14501	Group I	NP_182309	arsenate reductase (glutaredoxin)/ electron transporter/ thiol-disulfide exchange intermediate [Arabidopsis thaliana]	TC139892	weakly similar to RF|NP_182309.1|15227151|NM_130355 arsenate reductase (glutaredoxin)/ electron transporter/ thiol-disulfide exchange intermediate {Arabidopsis thaliana} (exp=-1; wgp=0; cg=0), partial (94%)	SGN-U277417
MICRO.7522.C2	0.383704	0.817393	0.925055	0.864105	0.642795	1.94741	1.04055	Group III	AAL92461	putative glucosyltransferase [Lycopersicon esculentum]	TC141528		SGN-U273847
MICRO.752.C2	0.574332	0.22838	1.43151	0.978824	1.78336	0.858322	1.39934	Group IV	BAC54827	vacuolar processing enzyme-1a [Nicotiana tabacum]	TC162091	homologue to UP|Q852T3_TOBAC (Q852T3) Vacuolar processing enzyme-1a, partial (68%)	SGN-U268931
MICRO.7502.C1	0.886485	1.44425	0.900322	0.66443	0.556137	0.612244	0.854043	Group V	AAQ07268	ripening induced protein [Ficus awkeotsang]	TC137366	weakly similar to UP|Q71HN3_FICAW (Q71HN3) Ripening induced protein, partial (93%)	SGN-U274467
MICRO.7483.C1	0.625728	0.606756	1.03814	0.87181	1.29192	0.688269	1.10858	Group IV	Q43845	Sucrose-phosphate synthase (UDP-glucose-fructose-phosphate glucosyltransferase)	TC135814	UP|SPS_SOLTU (Q43845) Sucrose-phosphate synthase (UDP-glucose-fructose-phosphate glucosyltransferase) , complete	SGN-U270084
MICRO.7465.C1	0.56284	1.54155	0.999433	0.536447	1.1815	0.537738	0.674297	Group IV	AAM23004	orcinol O-methyltransferase [Rosa hybrid cultivar]	TC135030	weakly similar to UP|Q5W2A5_ROSHC (Q5W2A5) Orcinol O-methyltransferase 4 (Fragment), partial (90%)	SGN-U273340
MICRO.7455.C1	1.33612	1.52266	0.885655	0.937819	1.16595	1.68261	0.769427	Group I	NA	NA	TC159146	GB|AAH19289.1|17939484|BC019289 chromobox homolog 8 {Homo sapiens} (exp=-1; wgp=0; cg=0), partial (5%)	SGN-U272850
MICRO.7420.C1	1.11642	1.03424	1.15164	1.52929	8.20528	1.64081	0.919639	Group VII	AAS67005	Phosphoenolpyruvate carboxylase [Glycine max]	TC138362	similar to UP|Q6Q2Z9_SOYBN (Q6Q2Z9) Phosphoenolpyruvate carboxylase , partial (53%)	SGN-U282052
MICRO.7419.C1	1.26109	1.92553	1.14605	6.97476	24.508	1.08012	0.644309	Group VII	NP_001058013	Os06g0603600 [Oryza sativa (japonica cultivar-group)]	TC137953	similar to UP|Q8LBH4_ARATH (Q8LBH4) Ids4-like protein, partial (68%)	SGN-U279776
MICRO.7402.C1	0.552336	0.591851	1.02846	1.15604	1.08019	0.747457	1.31527	Group III	CAA16542	predicted protein [Arabidopsis thaliana]	TC161924		SGN-U294942
MICRO.7398.C1	1.37425	0.695625	0.663095	1.15822	0.952242	1.40012	0.597561	Group I	AAS90324	3-dehydroquinate dehydratase / shikimate dehydrogenase isoform 2 [Nicotiana tabacum]	TC153708	similar to UP|Q6PUG0_TOBAC (Q6PUG0) 3-dehydroquinate dehydratase / shikimate dehydrogenase isoform 2 , partial (11%)	SGN-U271123
MICRO.7344.C2	0.672914	0.953384	0.995506	0.954139	1.86099	2.65959	1.00794	Group I	AAY68198	RNA polymerase IV second largest subunit [Rhododendron macrophyllum]	TC149744	similar to UP|Q7F9D6_ORYSA (Q7F9D6) DNA-directed RNA polymerase , partial (32%)	SGN-U275981
MICRO.7318.C1	0.515683	0.645257	1.06569	0.825209	1.10794	0.942524	0.876046	Group III	NP_187337	ATP binding / acyl-CoA dehydrogenase/ oxidoreductase/ protein kinase [Arabidopsis thaliana]	TC142558	similar to UP|Q67ZU5_ARATH (Q67ZU5) MRNA, complete cds, clone: RAFL22-73-C24, partial (87%)	SGN-U281493
MICRO.731.C1	1.28437	0.982819	1.63641	1.51783	1.12295	1.21627	1.12775	Group VI	NP_001066781	Os12g0485400 [Oryza sativa (japonica cultivar-group)]	TC146456	weakly similar to UP|Q6Z7H4_ORYSA (Q6Z7H4) Cyclin K-like, partial (36%)	SGN-U276843
MICRO.7289.C3	0.796289	0.465892	1.57144	0.66965	1.75673	0.723971	0.741299	Group IV	AAX20046	DC1.2-like [Capsicum annuum]	TC145013	similar to UP|Q2VT54_CAPAN (Q2VT54) DC1.2-like, partial (96%)	SGN-U269193
MICRO.7288.C1	0.471098	0.641202	0.851086	0.645282	0.903615	0.889123	0.875692	Group III	ABO81241	Heat shock protein Hsp70 [Medicago truncatula]	TC138235	similar to UP|Q9SKY8_ARATH (Q9SKY8) 70kD heat shock protein (At2g32120/F22D22.13), partial (33%)	SGN-U286262
MICRO.7275.C1	0.9192	1.44253	1.20339	4.14633	11.7305	2.46452	1.04317	Group I	P21568	Peptidyl-prolyl cis-trans isomerase (PPIase) (Rotamase) (Cyclophilin) (Cyclosporin A-binding protein)	TC138212	homologue to UP|CYPH_LYCES (P21568) Peptidyl-prolyl cis-trans isomerase (PPIase) (Rotamase) (Cyclophilin) (Cyclosporin A-binding protein) , complete	SGN-U273598
MICRO.7271.C1	0.838121	0.567616	0.956646	0.824219	0.911533	0.415171	1.39085	Group IV	ABD60225	ent-kaurenoic acid 13-hydroxylase [Stevia rebaudiana]	TC145507	weakly similar to UP|Q2MJ20_MEDTR (Q2MJ20) Cytochrome P450 monooxygenase CYP716A, partial (18%)	SGN-U280768
MICRO.7260.C1	0.933111	1.06662	0.985245	0.612108	0.640392	3.24565	0.98008	Group II	ABE84009	Quinonprotein alcohol dehydrogenase-like [Medicago truncatula]	TC159461	similar to RF|NP_179480.2|30680505|NM_127446 nucleotide binding {Arabidopsis thaliana} (exp=-1; wgp=0; cg=0), partial (25%)	SGN-U274292
MICRO.7255.C1	0.796916	1.00126	0.904634	0.600987	0.560758	2.33039	0.895843	Group II	NP_566609	unknown protein [Arabidopsis thaliana]	TC134784		SGN-U277315
MICRO.722.C1	0.868989	1.27816	1.04504	1.02625	0.39777	0.458711	1.00963	Group V	NP_181755	unknown protein [Arabidopsis thaliana]	TC159304		SGN-U285501
MICRO.7217.C1	0.635045	0.868974	0.970494	1.06207	1.16037	0.409358	1.17649	Group III	ABF56053	CONSTANS [Solanum tuberosum]	DR037628		SGN-U285271
MICRO.7205.C1	1.5896	1.12845	1.09651	0.871746	1.51304	0.919634	1.21107	Group I	AAD33596	thioredoxin h [Hevea brasiliensis]	TC142160	similar to UP|Q9XF70_HEVBR (Q9XF70) Thioredoxin h, partial (95%)	SGN-U270650
MICRO.718.C4	1.31467	0.935504	0.887227	0.700631	1.34348	0.53611	0.599027	Group IV	AAF64303	putative cytochrome P450 [Lycopersicon esculentum]	TC153892	weakly similar to UP|Q9LUD1_ARATH (Q9LUD1) Cytochrome P450-like protein, partial (19%)	SGN-U268726
MICRO.7154.C1	0.220191	0.656889	1.09639	0.956228	1.52377	1.08172	0.98229	Group III	CAA72908	hypothetical protein [Arabidopsis thaliana]	TC150061	similar to GB|AAC25507.1|3287679|T22J18 T22J18.6 {Arabidopsis thaliana} (exp=0; wgp=1; cg=0), partial (18%)	SGN-U283106
MICRO.7121.C1	1.34733	1.23838	1.09573	1.09133	1.59951	2.44334	0.990617	Group I	EAZ40607	hypothetical protein OsJ_024090 [Oryza sativa (japonica cultivar-group)]	TC136853	similar to UP|Q9XEV8_TOBAC (Q9XEV8) CCAAT-binding transcription factor subunit B, partial (56%)	SGN-U274337
MICRO.712.C31	2.05221	1.34159	1.36939	3.05328	10.0436	8.27821	1.43477	Group I	AAN76811	PEP carboxylase kinase [Solanum tuberosum]	TC134483	UP|Q8GZQ0_SOLTU (Q8GZQ0) PEP carboxylase kinase (PEPC kinase 1a), complete	SGN-U271455
MICRO.712.C30	0.868776	1.03264	1.0587	1.5262	3.19752	0.97806	1.3437	Group VII	AAQ10029	PEPC kinase 1b [Solanum tuberosum]	TC138898	UP|Q6KF87_SOLTU (Q6KF87) PEPC kinase 1b, complete	SGN-U271455
MICRO.712.C16	0.522121	0.853553	0.924844	1.02223	1.15837	0.585959	1.08554	Group III	Q9ZP40	Plastoglobulin-1, chloroplast precursor	TC143443	similar to UP|PAP3_ARATH (O82291) Probable plastid-lipid associated protein 3, chloroplast precursor (AtPap3) (Fibrillin 3), partial (60%)	SGN-U268297
MICRO.7108.C4	1.08127	0.895849	0.908234	0.821869	1.66929	2.14987	0.546076	Group I	NP_567506	pepsin A [Arabidopsis thaliana]	TC134818	similar to UP|Q940R4_ARATH (Q940R4) AT4g16560/dl4305c, partial (60%)	SGN-U275050
MICRO.7108.C2	0.92185	0.665797	0.95372	0.727423	1.59707	1.4948	0.615464	Group I	ABE80893	Peptidase aspartic, active site [Medicago truncatula]	TC134818	similar to UP|Q940R4_ARATH (Q940R4) AT4g16560/dl4305c, partial (60%)	SGN-U275050
MICRO.71.C5	0.843127	1.05204	0.843684	0.604473	0.657999	2.24343	0.930242	Group II	ABB55380	S-adenosyl-L-homocysteine hydrolase-like [Solanum tuberosum]	TC152257	UP|Q2XTD0_SOLTU (Q2XTD0) S-adenosyl-L-homocysteine hydrolase-like, partial (30%)	SGN-U268205
MICRO.7068.C1	1.13629	1.35289	0.933911	1.65446	1.9291	0.432477	0.856885	Group V	NA	NA	TC140941	similar to UP|Q6VBJ4_CANGA (Q6VBJ4) Epa5p, partial (8%)	SGN-U273028
MICRO.6998.C1	1.83474	0.80928	1.03144	0.843781	1.50631	1.26525	1.14865	Group I	ABE80772	Zinc finger, RING-type [Medicago truncatula]	TC146169	similar to GB|AAP54468.1|31432892|AE016959 expressed protein {Oryza sativa (japonica cultivar-group)} (exp=0; wgp=1; cg=0), partial (88%)	SGN-U272075
MICRO.6970.C2	0.609455	0.607203	1.03482	0.225595	1.12746	1.22031	1.00864	Group IV	Q8H1T3	Ferritin-2, chloroplast precursor (NtFer2)	TC138876	similar to UP|FRI2_TOBAC (Q8H1T3) Ferritin-2, chloroplast precursor (NtFer2) , complete	SGN-U268755
MICRO.697.C2	1.09501	0.913989	0.754619	0.507853	1.49031	0.498109	0.416921	Group IV	AAB05376	putative cytochrome P-450 [Nicotiana plumbaginifolia]	TC149313	weakly similar to UP|Q2LAK7_SOYBN (Q2LAK7) Cytochrome P450 monooxygenase CYP72A1 (Fragment), partial (21%)	SGN-U268872
MICRO.697.C1	1.14999	0.970682	0.783701	0.504546	1.54503	0.673791	0.431929	Group I	AAB05376	putative cytochrome P-450 [Nicotiana plumbaginifolia]	TC141445	weakly similar to UP|Q9AX23_ORYSA (Q9AX23) Cytochrome P450-like, partial (46%)	SGN-U268872
MICRO.6969.C1	0.932425	1.34178	1.03855	0.629289	0.582326	2.65721	0.835667	Group II	ABE93667	hypothetical protein MtrDRAFT_AC144375g10v2 [Medicago truncatula]	TC161549	similar to UP|O22702_ARATH (O22702) F8A5.16 protein, partial (25%)	SGN-U283738
MICRO.6933.C1	0.785472	0.503757	0.934189	0.460939	1.09741	6.80549	1.11557	Group I	AAD50644	ferritin 1 [Solanum tuberosum]	TC135253	UP|Q9SWS0_SOLTU (Q9SWS0) Ferritin 1 (Fragment), complete	SGN-U270205
MICRO.692.C5	0.559352	1.31333	0.975937	0.798534	0.531906	1.81359	0.906933	Group II	ABE80883	Ribosomal protein S30 [Medicago truncatula]	TC154870	UP|Q6K853_ORYSA (Q6K853) 40S ribosomal protein S30-like, complete	SGN-U269075
MICRO.6893.C3	0.646029	0.652023	1.14159	1.05927	1.15684	0.962081	1.51218	Group III	NP_194233	unknown protein [Arabidopsis thaliana]	TC148460		SGN-U270307
MICRO.6886.C4	1.53563	1.03038	0.991362	0.746781	0.811968	1.50276	0.869762	Group II	ABN07995	RNA polymerase subunit, RPB5; RNA polymerase Rpb5, N-terminal [Medicago truncatula]	TC159340	weakly similar to UP|Q9LKX4_BRANA (Q9LKX4) RPB5d, partial (50%)	SGN-U273978
MICRO.6881.C4	0.628555	0.523641	1.00923	1.0553	1.23545	0.651792	1.18191	Group IV	NP_186994	unknown protein [Arabidopsis thaliana]	TC139351	weakly similar to UP|Q71VM2_ORYSA (Q71VM2) Plakoglobin/armadillo/beta-catenin-like protein (Fragment), partial (44%)	SGN-U272149
MICRO.688.C1	1.52661	1.26395	1.07292	0.978202	1.56441	0.962369	0.955956	Group I	NP_001044503	Os01g0794400 [Oryza sativa (japonica cultivar-group)]	TC135349	weakly similar to UP|Q6QUQ2_QUESU (Q6QUQ2) Protein disulfide isomerase, partial (25%)	SGN-U272003
MICRO.6864.C1	0.579839	0.602559	1.01849	1.02558	1.07872	0.695234	1.35644	Group III	ABE91354	Lissencephaly type-1-like homology motif; CTLH, C-terminal to LisH motif [Medicago truncatula]	TC142073	similar to UP|Q94A50_ARATH (Q94A50) AT3g55070/T15C9_70, partial (70%)	SGN-U272348
MICRO.6861.C2	1.54052	1.05757	1.02587	0.803581	1.15524	1.86731	1.15638	Group I	P46942	ATP-dependent RNA helicase-like protein DB10	TC134488	similar to UP|DB10_NICSY (P46942) ATP-dependent RNA helicase-like protein DB10 , partial (29%)	SGN-U272036
MICRO.6840.C1	0.78053	1.06504	1.08035	0.660977	0.620769	1.88978	0.961026	Group II	NP_201011	OXA1; protein translocase [Arabidopsis thaliana]	TC142990	weakly similar to UP|OXA1_ARATH (Q42191) Inner membrane protein OXA1, mitochondrial precursor (Oxidase assembly 1 protein) (AtOXA1), partial (55%)	SGN-U274182
MICRO.6809.C3	2.06765	0.535112	0.932833	1.01391	4.61295	4.16335	0.0638361	Group I	Q41489	Proteinase inhibitor type-2 precursor (Proteinase inhibitor type II)	TC155398	homologue to UP|IP2Y_SOLTU (Q41489) Proteinase inhibitor type-2 precursor (Proteinase inhibitor type II), complete	SGN-U268249
MICRO.6803.C1	1.69115	1.01809	0.899134	1.09716	1.53548	2.48508	0.979612	Group I	CAA18747	putative protein [Arabidopsis thaliana]	BG889256		SGN-U271647
MICRO.6800.C2	1.52795	0.814579	1.10836	0.865841	1.72208	0.822129	0.865226	Group I	CAB38827	putative zinc finger protein [Arabidopsis thaliana]	TC159235	similar to GB|AAF87126.1|9369377|AC006434 F10A5.24 {Arabidopsis thaliana} (exp=0; wgp=1; cg=0), partial (21%)	SGN-U273112
MICRO.680.C2	0.619878	0.74567	1.05136	0.978778	1.30631	0.589406	0.906003	Group III	AAY22200	squalene monooxygenase [Datura innoxia]	TC161634	homologue to UP|Q506K3_DATIN (Q506K3) Squalene monooxygenase, partial (58%)	SGN-U269909
MICRO.6799.C1	0.748295	1.32455	1.0107	0.592383	0.52924	3.24275	0.770355	Group II	NP_179414	unknown protein [Arabidopsis thaliana]	TC161856	similar to UP|NOC2L_ARATH (Q9ZPV5) Nucleolar complex protein 2 homolog (NOC2 protein homolog), partial (40%)	SGN-U293353
MICRO.6776.C1	1.01715	1.55083	0.990576	0.733131	0.67689	1.60903	1.12514	Group II	NP_199579	unknown protein [Arabidopsis thaliana]	TC135315	similar to GB|AAP68268.1|31711824|BT008829 At5g47680 {Arabidopsis thaliana} (exp=-1; wgp=0; cg=0), partial (78%)	SGN-U292391
MICRO.6754.C1	1.69329	0.706543	1.49095	1.0412	1.58975	0.847514	0.956094	Group VII	NP_194504	unknown protein [Arabidopsis thaliana]	TC147484	weakly similar to UP|Q2V3E2_ARATH (Q2V3E2) Protein At4g27740, partial (90%)	SGN-U276446
MICRO.673.C2	0.565818	0.939611	0.888429	0.792123	0.560202	1.12861	1.11794	Group III	ABO84680	Pentatricopeptide repeat [Medicago truncatula]	TC133123	weakly similar to GB|AAP31962.1|30387593|BT006618 At3g06430 {Arabidopsis thaliana} (exp=-1; wgp=0; cg=0), partial (44%)	SGN-U278674
MICRO.6718.C1	1.63722	0.921781	1.02873	0.861704	4.41104	5.42681	0.686657	Group I	NA	NA	TC134893	similar to UP|TAS14_LYCES (P22240) Abscisic acid and environmental stress-inducible protein TAS14 (Dehydrin TAS14), partial (90%)	SGN-U269263
MICRO.6706.C1	1.18727	1.4247	1.04161	2.71936	7.02208	1.30875	1.07585	Group VII	ABJ91228	CBL-interacting protein kinase 22 [Populus trichocarpa]	TC137323	similar to UP|Q8H2C2_PERAE (Q8H2C2) Serine/threonine kinase, partial (87%)	SGN-U275694
MICRO.67.C1	0.571226	1.23441	1.01169	0.88691	0.892907	0.5735	1.18141	Group III	ABE89592	Beta tubulin; Remorin, C-terminal region [Medicago truncatula]	TC151347	similar to UP|Q3ECW7_ARATH (Q3ECW7) Protein At1g45207, partial (14%)	SGN-U274032
MICRO.6678.C1	0.590561	0.946544	0.822349	0.846958	0.632748	1.83506	0.869607	Group II	NP_565409	unknown protein [Arabidopsis thaliana]	TC146157	similar to UP|Q9SII5_ARATH (Q9SII5) Expressed protein (At2g17230/T23A1.9), partial (34%)	SGN-U280264
MICRO.6663.C9	0.528046	0.791587	0.655595	0.667087	2.87173	2.40713	0.789241	Group I	AAD04258	5-lipoxygenase [Solanum tuberosum]	TC134133	UP|O49150_SOLTU (O49150) 5-lipoxygenase, complete	SGN-U268109
MICRO.6656.C1	0.835482	0.985342	0.590264	1.03988	1.03057	0.306074	0.761823	Group V	ABE85395	hypothetical protein MtrDRAFT_AC121244g5v2 [Medicago truncatula]	TC161101		SGN-U281513
MICRO.6651.C1	1.06089	1.45811	2.12136	1.39131	1.86965	0.925079	0.751731	Group VII	BAA03413	EDGP precursor [Daucus carota]	TC138202	weakly similar to UP|Q8GT67_LYCES (Q8GT67) Xyloglucan-specific fungal endoglucanase inhibitor protein, partial (40%)	SGN-U272239
MICRO.6640.C1	1.24125	0.790574	0.950484	0.925472	1.91485	0.451486	0.598147	Group IV	CAA77867	H1 histone-like protein [Solanum lycopersicum]	TC135477	homologue to UP|Q43511_LYCES (Q43511) H1 histone-like protein, complete	SGN-U270784
MICRO.6616.C3	1.77625	0.914933	1.00286	0.672458	2.02422	0.957111	0.59976	Group I	NP_567545	unknown protein [Arabidopsis thaliana]	TC137167	weakly similar to UP|Q7XBV4_ORYSA (Q7XBV4) Expressed protein, partial (21%)	SGN-U269555
MICRO.66.C1	0.410482	0.612448	1.01265	0.870034	0.703448	1.35347	1.19953	Group III	ABE88774	Translation factor; Elongation factor G, III and V [Medicago truncatula]	TC150719	homologue to UP|Q9ASR1_ARATH (Q9ASR1) At1g56070/T6H22_13 (Elongation factor EF-2), partial (71%)	SGN-U268286
MICRO.6598.C1	0.533686	0.617177	1.12463	0.911963	1.28414	1.16332	0.839589	Group III	ABE92593	Membrane attack complex component/perforin/complement C9 [Medicago truncatula]	TC162039		SGN-U282415
MICRO.6585.C1	0.665241	0.659783	0.904879	0.772151	1.1456	0.794529	1.21646	Group III	NP_187648	glycerol-3-phosphate dehydrogenase [Arabidopsis thaliana]	TC132929	similar to RF|NP_187648.1|15228273|NM_111872 glycerol-3-phosphate dehydrogenase {Arabidopsis thaliana} (exp=-1; wgp=0; cg=0), partial (47%)	SGN-U296375
MICRO.6571.C1	0.645431	0.642087	1.54349	1.65227	1.10816	1.47288	1.32087	Group VI	NP_001064013	Os10g0101000 [Oryza sativa (japonica cultivar-group)]	TC150811		SGN-U282609
MICRO.6537.C1	0.664996	0.620038	1.11028	0.903724	1.29081	0.623545	1.14042	Group IV	AAX36074	non-intrinsic ABC protein [Nicotiana benthamiana]	TC157160	homologue to UP|Q58IU5_NICBE (Q58IU5) Non-intrinsic ABC protein (Fragment), partial (80%)	SGN-U280530
MICRO.652.C2	0.585487	1.03979	1.02512	1.06099	0.560354	1.57086	0.928646	Group II	NP_181986	protein binding / ubiquitin-protein ligase/ zinc ion binding [Arabidopsis thaliana]	TC134884	similar to RF|NP_181986.1|15224911|NM_130022 protein binding {Arabidopsis thaliana} (exp=-1; wgp=0; cg=0), partial (6%)	SGN-U276335
MICRO.6506.C1	2.50118	0.909399	0.839718	1.5753	1.7867	1.181	0.168818	Group I	CAC40756	putative miraculin [Atropa belladonna]	TC152763	weakly similar to UP|Q40091_IPOBA (Q40091) Sweet potato sporamin B, partial (13%)	SGN-U282643
MICRO.6500.C3	1.08585	1.11875	0.995903	1.04122	0.623108	0.519209	1.12316	Group V	EAZ26242	hypothetical protein OsJ_009725 [Oryza sativa (japonica cultivar-group)]	TC144366	similar to UP|Q9LR08_ARATH (Q9LR08) F10A5.12, partial (45%)	SGN-U272073
MICRO.6496.C1	1.53075	0.983575	0.932405	1.04707	0.999378	1.82926	1.02518	Group I	NP_175691	oxidoreductase, acting on paired donors, with incorporation or reduction of molecular oxygen, 2-oxoglutarate as one donor, and incorporation of one atom each of oxygen into both donors [Arabidopsis thaliana]	TC153106	weakly similar to RF|NP_175691.1|15219099|NM_104160 oxidoreductase, acting on paired donors, with incorporation or reduction of molecular oxygen, 2-oxoglutarate as one donor, and incorporation of one atom each of oxygen into both donors {Arabidopsis thaliana} (exp=-1; wgp=0; cg=0), partial (55%)	SGN-U276907
MICRO.6475.C1	0.615993	0.890672	1.36433	0.927176	0.60788	1.28596	1.72671	Group III	AAZ23955	GDSL-lipase 1 [Capsicum annuum]	TC159680	similar to RF|NP_174260.1|15220514|NM_102707 carboxylic ester hydrolase/ hydrolase, acting on ester bonds {Arabidopsis thaliana} (exp=-1; wgp=0; cg=0), partial (92%)	SGN-U280016
MICRO.6467.C1	1.74232	0.655682	1.41186	0.806056	2.38942	1.50636	0.666648	Group I	AAF04915	jasmonic acid 2 [Lycopersicon esculentum]	TC160318	similar to UP|Q66TP0_SOLTU (Q66TP0) Jasmonic acid 2, partial (68%)	SGN-U292639
MICRO.6462.C1	1.05304	1.25071	1.04599	0.675041	0.451798	0.689993	0.603255	Group II	NP_001056338	Os05g0565400 [Oryza sativa (japonica cultivar-group)]	TC154029	weakly similar to UP|Q8DJH6_SYNEL (Q8DJH6) Ycf23 protein, partial (88%)	SGN-U273684
MICRO.646.C10	0.605022	0.732739	0.976153	1.00722	0.921246	0.726386	0.52206	Group V	Q06355	Catechol oxidase B, chloroplast precursor (Polyphenol oxidase) (PPO)	TC132804	UP|PPOB_SOLTU (Q06355) Catechol oxidase B, chloroplast precursor (Polyphenol oxidase) (PPO) (Fragment) , complete	SGN-U268107
MICRO.6456.C2	0.733008	0.496258	1.86071	1.66219	1.1151	1.45719	1.21104	Group VI	CAA76726	P69C protein [Solanum lycopersicum]	TC145443	homologue to UP|Q9ZR46_LYCES (Q9ZR46) P69C protein, partial (44%)	SGN-U277499
MICRO.645.C3	0.4483	0.851085	0.910918	0.799208	0.616901	1.49752	1.00495	Group III	BAE71311	putative rubisco subunit binding-protein alpha subunit [Trifolium pratense]	TC140828	similar to UP|RUBA_ARATH (P21238) RuBisCO large subunit-binding protein subunit alpha, chloroplast precursor (60 kDa chaperonin subunit alpha) (CPN-60 alpha), partial (80%)	SGN-U268588
MICRO.643.C1	0.548495	0.782196	0.907469	1.07709	0.968474	0.454159	0.876461	Group III	CAC87810	Tic62 protein [Pisum sativum]	TC144127	similar to GB|AAP37762.1|30725480|BT008403 At3g18890 {Arabidopsis thaliana} (exp=-1; wgp=0; cg=0), partial (25%)	SGN-U277439
MICRO.6330.C1	0.658654	1.07239	1.91617	3.36626	1.00771	1.90995	0.832498	Group VI	CAC83606	putative receptor-like serine-threonine protein kinase [Solanum tuberosum]	TC133960	weakly similar to UP|O65466_ARATH (O65466) Serine/threonine kinase-like protein, partial (34%)	SGN-U271842
MICRO.633.C4	1.03207	0.654214	1.62387	1.57205	1.04802	1.26211	1.00206	Group VI	AAP20421	mitogen-activated protein kinase 3 [Lycopersicon esculentum]	TC146602	UP|Q84MI4_LYCES (Q84MI4) Mitogen-activated protein kinase 3, partial (51%)	SGN-U270747
MICRO.633.C3	1.38007	0.75244	1.75472	1.96707	1.15685	1.61553	0.924693	Group VI	AAP20421	mitogen-activated protein kinase 3 [Lycopersicon esculentum]	TC160137	homologue to UP|Q84MI4_LYCES (Q84MI4) Mitogen-activated protein kinase 3, partial (17%)	SGN-U270746
MICRO.631.C1	0.816097	1.90927	1.16601	1.513	0.721477	0.329641	0.542749	Group V	BAE99414	hypothetical protein [Arabidopsis thaliana]	TC135004	similar to UP|Q6ASS4_ORYSA (Q6ASS4) SNF7 family protein, partial (88%)	SGN-U280869
MICRO.6304.C1	1.54285	0.993505	0.763748	0.820511	1.21362	2.34184	0.517539	Group I	AAP92160	chlorophyllase [Piper betle]	TC148599	similar to UP|CLH2_ARATH (Q9M7I7) Chlorophyllase-2, chloroplast precursor (AtCLH2) (Chlorophyll-chlorophyllido hydrolase 2) (Chlase 2) , partial (16%)	SGN-U286126
MICRO.630.C1	0.865357	1.22292	1.17921	1.31087	0.490129	0.569653	0.843301	Group V	CAC15503	B1-type cyclin dependent kinase [Solanum lycopersicum]	TC139260	UP|Q9FSH5_LYCES (Q9FSH5) B1-type cyclin dependent kinase, complete	SGN-U271976
MICRO.6284.C2	0.501835	1.4118	1.58514	2.02779	4.0039	1.18135	0.646126	Group VII	NP_195300	unknown protein [Arabidopsis thaliana]	TC136718	similar to GB|AAP37803.1|30725562|BT008444 At4g35750 {Arabidopsis thaliana} (exp=-1; wgp=0; cg=0), partial (88%)	SGN-U273515
MICRO.6284.C1	1.09079	2.73396	2.35035	2.12413	8.19627	1.64651	0.562212	Group VII	NP_195300	unknown protein [Arabidopsis thaliana]	TC136718	similar to GB|AAP37803.1|30725562|BT008444 At4g35750 {Arabidopsis thaliana} (exp=-1; wgp=0; cg=0), partial (88%)	SGN-U273515
MICRO.6281.C3	1.47478	1.67505	0.902326	0.86308	0.700278	2.43884	0.969901	Group I	EAY83386	hypothetical protein OsI_037345 [Oryza sativa (indica cultivar-group)]	TC143960	weakly similar to UP|Q2QP93_ORYSA (Q2QP93) Expressed protein, partial (37%)	SGN-U272889
MICRO.6275.C1	0.633595	1.08529	1.00476	0.988194	0.638677	0.772007	0.866464	Group V	CAA73973	dem [Solanum lycopersicum]	TC145373	homologue to UP|O04394_LYCES (O04394) Dem protein, partial (27%)	SGN-U284086
MICRO.6271.C1	0.576352	1.18513	0.971001	0.891619	0.863066	0.455393	0.790392	Group III	BAD38324	putative AAA ATPase, central region (50.1 kD) [Oryza sativa (japonica cultivar-group)]	TC156590	weakly similar to UP|Q69S62_ORYSA (Q69S62) AAA-type ATPase-like, partial (35%)	SGN-U290692
MICRO.6261.C1	0.949401	0.706839	0.962905	1.64503	1.50416	0.610479	1.045	Group VII	NP_001056650	Os06g0125400 [Oryza sativa (japonica cultivar-group)]	TC148706	similar to UP|OPT7_ARATH (O82485) Oligopeptide transporter 7 (AtOPT7), partial (30%)	SGN-U284742
MICRO.6231.C2	1.20972	0.479647	0.847883	1.1837	1.02577	0.528902	1.20065	Group IV	Q42945	Caffeoyl-CoA O-methyltransferase 6 (Trans-caffeoyl-CoA 3-O-methyltransferase 6) (CCoAMT-6) (CCoAOMT-6)	TC134901	homologue to UP|CAMT6_TOBAC (Q42945) Caffeoyl-CoA O-methyltransferase 6 (Trans-caffeoyl-CoA 3-O-methyltransferase 6) (CCoAMT-6) (CCoAOMT-6) , complete	SGN-U271214
MICRO.6231.C1	1.34136	0.598296	0.971042	0.967283	0.923708	0.48517	0.750818	Group IV	O04899	Caffeoyl-CoA O-methyltransferase 5 (Trans-caffeoyl-CoA 3-O-methyltransferase 5) (CCoAMT-5) (CCoAOMT-5)	TC157700	homologue to UP|CAMT5_TOBAC (O04899) Caffeoyl-CoA O-methyltransferase 5 (Trans-caffeoyl-CoA 3-O-methyltransferase 5) (CCoAMT-5) (CCoAOMT-5) , partial (97%)	SGN-U271213
MICRO.6216.C1	0.862092	1.01867	0.931804	0.877579	0.326375	0.563559	1.06011	Group V	O65821	Histone H2B.1 (LeH2B-1)	TC148373	UP|O65821_LYCES (O65821) Histone H2B, complete	SGN-U268885
MICRO.620.C1	0.582997	1.15488	1.19465	1.05159	1.11009	0.648875	0.83229	Group III	ABO80276	NUDIX hydrolase [Medicago truncatula]	TC144063	similar to UP|NUD21_ARATH (Q8VY81) Nudix hydrolase 21, chloroplast precursor (AtNUDT21) , partial (37%)	SGN-U279865
MICRO.6187.C2	1.44506	1.03516	2.22975	2.91203	0.773104	2.40396	0.609508	Group VI	CAA52872	glucan endo-1,3-beta-D-glucosidase [Solanum lycopersicum]	TC145793	homologue to UP|Q42890_LYCES (Q42890) Glucan endo-1,3-beta-D-glucosidase precursor , partial (96%)	SGN-U272569
MICRO.6187.C1	1.70958	0.83029	2.51596	2.87612	0.597391	2.64718	0.534224	Group VI	CAA52872	glucan endo-1,3-beta-D-glucosidase [Solanum lycopersicum]	TC145793	homologue to UP|Q42890_LYCES (Q42890) Glucan endo-1,3-beta-D-glucosidase precursor , partial (96%)	SGN-U272569
MICRO.6174.C2	0.538464	0.819168	0.880339	0.889701	0.62674	0.748451	1.62512	Group III	NP_195847	ATNAP9 [Arabidopsis thaliana]	TC152854	similar to UP|Q9LZ98_ARATH (Q9LZ98) ABC transporter-like protein (At5g02270), partial (52%)	SGN-U282768
MICRO.6170.C1	1.3128	0.788587	0.991619	0.898029	0.664055	0.696045	0.600977	Group V	ABE77151	aromatic amino acid decarboxylase 2 [Lycopersicon esculentum]	TC162347	similar to UP|DCHS_LYCES (P54772) Histidine decarboxylase (HDC) (TOM92) , partial (82%)	SGN-U291934
MICRO.6152.C1	0.672349	1.21919	0.870702	0.77174	0.501978	0.65826	0.954623	Group V	EAY96621	hypothetical protein OsI_017854 [Oryza sativa (indica cultivar-group)]	TC158005	similar to UP|Q2HU25_MEDTR (Q2HU25) Pyridine nucleotide-disulphide oxidoreductase, class I, partial (46%)	SGN-U282771
MICRO.615.C2	0.434558	0.654618	0.999325	0.566536	0.694633	1.58698	0.937655	Group III	Q08276	Heat shock 70 kDa protein, mitochondrial precursor	TC133195	homologue to UP|HSP7M_SOLTU (Q08276) Heat shock 70 kDa protein, mitochondrial precursor, complete	SGN-U270363
MICRO.615.C1	0.4478	0.69449	1.01141	0.550371	0.704583	2.04497	1.02476	Group III	Q08276	Heat shock 70 kDa protein, mitochondrial precursor	TC138921	homologue to UP|HSP7M_SOLTU (Q08276) Heat shock 70 kDa protein, mitochondrial precursor, partial (31%)	SGN-U272375
MICRO.6146.C1	0.762277	1.03373	1.61795	1.60835	1.09823	1.10429	1.08954	Group VI	AAY54606	NRG1 [Nicotiana benthamiana]	TC146090	weakly similar to UP|Q4TVR0_NICBE (Q4TVR0) NRG1, partial (12%)	SGN-U274601
MICRO.6129.C1	1.392	3.08472	2.01887	3.47867	13.5938	0.949279	0.709595	Group VII	CAG29394	IDS4-like protein [Solanum lycopersicum]	TC142467	homologue to UP|Q6A1K8_LYCES (Q6A1K8) IDS4-like protein, partial (90%)	SGN-U276348
MICRO.6105.C1	0.410056	1.09975	0.881145	1.32936	1.7692	0.652481	0.871936	Group III	AAQ09436	photosystem II cp47 protein [Stewartia pseudocamellia]	TC132823	UP|PSBB_TOBAC (P06411) Photosystem II P680 chlorophyll A apoprotein (CP-47 protein), complete	SGN-U276309
MICRO.61.C5	2.4303	1.15796	0.988324	0.955948	1.54824	1.09165	0.736055	Group I	NA	NA	TC161198	UP|Q4TGJ7_TETNG (Q4TGJ7) Chromosome undetermined SCAF3659, whole genome shotgun sequence. (Fragment), partial (7%)	SGN-U268131
MICRO.6082.C1	0.677244	0.832686	0.986708	1.03751	0.402391	0.534265	1.11876	Group III	O65818	Histone H2B.2 (LeH2B-2)	TC146929	homologue to UP|O65818_LYCES (O65818) Histone H2B-2 (Fragment), partial (98%)	SGN-U268888
MICRO.6055.C2	0.673485	0.801734	1.09254	0.635411	0.874456	1.20019	0.485981	Group V	Q43188	Chalcone synthase 2 (Naringenin-chalcone synthase 2)	TC143194	UP|CHS2_SOLTU (Q43188) Chalcone synthase 2 (Naringenin-chalcone synthase 2) , complete	SGN-U269996
MICRO.6027.C1	1.05068	0.836211	0.976108	1.60044	3.04028	0.616263	0.98398	Group VII	ABA55726	sulfoquinovosyldiacylglycerol synthase type 2 [Vigna unguiculata]	TC138640		SGN-U280369
MICRO.602.C2	1.46509	0.720752	2.74062	0.713839	1.23156	2.18496	0.837448	Group I	AAN32641	putative short-chain type alcohol dehydrogenase [Solanum tuberosum]	TC143666	weakly similar to UP|Q67Z59_ARATH (Q67Z59) Beta-ketoacyl-ACP reductase-like protein, partial (79%)	SGN-U270854
MICRO.6017.C3	0.705633	0.786579	1.63145	1.32591	1.4714	10.1267	0.91025	Group I	AAY47050	ascorbate oxidase [Lycopersicon esculentum]	TC151627	homologue to UP|Q4VDN6_LYCES (Q4VDN6) Ascorbate oxidase , partial (55%)	SGN-U276734
MICRO.5990.C1	0.644037	0.776917	1.07347	0.840533	0.659736	2.09013	0.881101	Group II	NP_177879	protein binding / tubulin-tyrosine ligase [Arabidopsis thaliana]	TC161155	weakly similar to UP|Q6IDC7_ARATH (Q6IDC7) At1g77550, partial (27%)	SGN-U294033
MICRO.5989.C2	1.01765	0.801722	1.29432	0.858532	0.925701	0.593345	0.643469	Group IV	AAQ63185	germin-like protein 3 [Vitis vinifera]	TC143047	weakly similar to UP|GL113_ARATH (P92997) Germin-like protein subfamily 1 member 13 precursor, partial (58%)	SGN-U270726
MICRO.5962.C1	0.520779	0.629124	0.961096	1.15231	1.28146	1.31686	0.941864	Group III	AAK72885	putative lipid acyl hydrolase [Oryza sativa]	TC134731	similar to RF|NP_181455.1|15225054|NM_129480 nutrient reservoir {Arabidopsis thaliana} (exp=-1; wgp=0; cg=0), partial (28%)	SGN-U272383
MICRO.5958.C1	1.01099	1.0493	0.93053	0.526943	1.55869	0.451526	0.342345	Group IV	ABE87434	Sterol desaturase [Medicago truncatula]	TC146558	weakly similar to UP|Q5J955_NICBE (Q5J955) C-4 sterol methyl oxidase 1 (Fragment), partial (67%)	SGN-U277669
MICRO.5938.C1	0.990894	0.459649	1.0701	1.26077	1.1034	0.509038	1.25928	Group IV	AAP32193	cysteine protease 14 [Trifolium repens]	TC147085	similar to UP|Q6Y1E9_TRIRP (Q6Y1E9) Cysteine protease 14, partial (88%)	SGN-U279874
MICRO.5927.C1	0.56743	0.759287	1.00013	1.01698	1.37823	0.599111	0.93133	Group III	AAL02092	cryptochrome 1b [Lycopersicon esculentum]	TC152046	homologue to UP|Q93VS0_LYCES (Q93VS0) Cryptochrome 1b, partial (58%)	SGN-U276747
MICRO.5923.C2	1.20835	0.789644	1.64577	1.87182	1.85481	1.39768	1.20708	Group VI	ABN09016	Phosphoglycerate/bisphosphoglycerate mutase [Medicago truncatula]	TC136229		SGN-U273450
MICRO.5923.C1	1.32265	0.772067	1.65462	2.74287	1.81285	1.18981	1.14351	Group VI	BAF01531	hypothetical protein [Arabidopsis thaliana]	TC136229		SGN-U273450
MICRO.592.C3	1.67788	0.554045	1.205	1.10735	1.13561	3.40317	0.935137	Group I	AAX20044	probable glutathione-S-transferase [Capsicum annuum]	TC161751	similar to UP|Q2VT56_CAPAN (Q2VT56) Probable glutathione-S-transferase, partial (80%)	SGN-U268701
MICRO.592.C1	1.00793	0.56826	1.67127	1.21675	0.635303	2.41078	0.962569	Group VI	P32111	Probable glutathione S-transferase (Pathogenesis-related protein 1)	TC137670	UP|GSTX1_SOLTU (P32111) Probable glutathione S-transferase (Pathogenesis-related protein 1) , partial (93%)	SGN-U268700
MICRO.5897.C1	0.536907	0.648153	0.991579	0.952407	0.826916	0.728984	1.04309	Group III	Q9SE94	Methylenetetrahydrofolate reductase 1 (ZmMTHFR1)	TC140201	similar to UP|MTHR1_MAIZE (Q9SE94) Methylenetetrahydrofolate reductase 1 (ZmMTHFR1) , partial (34%)	SGN-U294031
MICRO.5878.C1	1.79822	0.730123	0.942714	0.40836	2.11556	1.63185	0.0940222	Group I	P31212	Threonine dehydratase biosynthetic (Threonine deaminase) (TD)	TC148229	homologue to UP|THD1_SOLTU (P31212) Threonine dehydratase biosynthetic (Threonine deaminase) (TD) (Fragment) , complete	SGN-U274897
MICRO.5875.C1	1.1588	1.32791	0.949422	0.806398	0.593749	0.4473	0.97207	Group V	CAA60774	ribosomal protein L35 [Arabidopsis thaliana]	TC144251	similar to UP|RK35_SPIOL (P23326) 50S ribosomal protein L35, chloroplast precursor (CL35), partial (47%)	SGN-U276297
MICRO.5847.C1	0.664073	0.666304	0.930695	0.493387	1.06236	0.318586	0.956934	Group IV	Q40460	Ribulose bisphosphate carboxylase/oxygenase activase 1, chloroplast precursor (RuBisCO activase 1) (RA 1)	TC156902	homologue to UP|RCA2_TOBAC (Q40565) Ribulose bisphosphate carboxylase/oxygenase activase 2, chloroplast precursor (RuBisCO activase 2) (RA 2), partial (98%)	SGN-U268397
MICRO.5837.C1	0.527136	0.741784	1.10306	0.918878	1.24448	0.564209	1.06984	Group III	BAB55655	fructose-6-phosphate 2-kinase/fructose-2,6-bisphosphatase [Bruguiera gymnorrhiza]	TC158182	similar to UP|Q93XR7_9ROSI (Q93XR7) Fructose-6-phosphate 2-kinase/fructose-2,6-bisphosphatase, partial (31%)	SGN-U276738
MICRO.5828.C1	0.415658	0.91856	0.948906	0.694793	0.640225	1.34018	0.959891	Group III	NP_199470	unknown protein [Arabidopsis thaliana]	TC136020	weakly similar to UP|Q7S4N1_NEUCR (Q7S4N1) Predicted protein, partial (3%)	SGN-U276427
MICRO.5786.C1	0.551226	0.823943	0.903363	0.976663	1.30704	0.661381	1.12794	Group III	NP_564145	NADK2; NAD+ kinase [Arabidopsis thaliana]	TC159757	homologue to UP|Q4SIE8_TETNG (Q4SIE8) Chromosome 5 SCAF14581, whole genome shotgun sequence, partial (5%)	SGN-U286118
MICRO.5784.C2	1.06289	1.24108	0.946363	0.906811	0.646905	0.598317	0.849033	Group V	P53535	Alpha-1,4 glucan phosphorylase L-2 isozyme, chloroplast precursor (Starch phosphorylase L-2)	TC135756	UP|PHSL2_SOLTU (P53535) Alpha-1,4 glucan phosphorylase, L-2 isozyme, chloroplast precursor (Starch phosphorylase L-2) , complete	SGN-U272349
MICRO.5780.C3	1.07155	0.693425	2.28062	1.42837	1.253	3.56657	1.79543	Group VI	NP_001061950	Os08g0451800 [Oryza sativa (japonica cultivar-group)]	TC133511		SGN-U272079
MICRO.5780.C1	1.09483	1.22165	2.04761	1.88829	1.11979	2.79747	1.09126	Group VI	NP_189542	calcium ion binding [Arabidopsis thaliana]	TC150015	similar to RF|NP_189542.1|15228558|NM_113821 calcium ion binding {Arabidopsis thaliana} (exp=-1; wgp=0; cg=0), partial (19%)	SGN-U288349
MICRO.5762.C1	0.878482	0.944948	0.878027	1.05758	0.598257	0.559013	0.966763	Group V	AAL49750	aquaporin-like protein [Petunia x hybrida]	TC151232	homologue to UP|Q8W1A8_PETHY (Q8W1A8) Aquaporin-like protein, partial (91%)	SGN-U283930
MICRO.5729.C1	0.596902	0.802822	1.4554	2.02894	0.961022	0.606644	1.31696	Group VIII	CAA06997	subtilisin-like protease [Solanum lycopersicum]	TC152830	weakly similar to UP|O82777_LYCES (O82777) Subtilisin-like protease, partial (12%)	SGN-U281650
MICRO.5706.C1	1.02902	1.15219	1.436	0.520798	1.56241	0.568339	0.727582	Group IV	EAY98744	hypothetical protein OsI_019977 [Oryza sativa (indica cultivar-group)]	TC143552	similar to UP|Q29PZ2_ARATH (Q29PZ2) At3g03170, partial (24%)	SGN-U273500
MICRO.5703.C1	1.52699	0.991267	0.937532	0.76883	1.06079	1.39467	1.52009	Group I	CAG26715	ammonium transporter [Populus tremula x Populus tremuloides]	TC150346	homologue to UP|AMT12_LYCES (O04161) Ammonium transporter 1, member 2 (LeAMT1;2), partial (38%)	SGN-U296715
MICRO.5668.C1	1.16039	0.73595	0.891433	0.64946	1.62387	2.8974	0.82422	Group I	NP_182240	transferase, transferring hexosyl groups [Arabidopsis thaliana]	TC137253	similar to UP|Q9XEJ7_BRANA (Q9XEJ7) Galactinol synthase (Fragment), partial (57%)	SGN-U271807
MICRO.5650.C1	0.578007	1.86613	1.10263	1.69564	0.820151	0.925391	0.716472	Group V	AAO15358	kinesin related protein [Lycopersicon esculentum]	TC161204	homologue to UP|Q8GZU1_LYCES (Q8GZU1) Kinesin related protein, partial (32%)	SGN-U281437
MICRO.5640.C1	1.14564	0.896282	0.848804	0.399721	0.56983	0.545018	1.04197	Group V	NP_565853	unknown protein [Arabidopsis thaliana]	TC153890	similar to UP|Q3EBL7_ARATH (Q3EBL7) Protein At2g36885, partial (63%)	SGN-U280143
MICRO.5626.C1	1.64952	0.930132	0.687659	0.267232	0.727506	1.35043	0.610516	Group I	P51819	Heat shock protein 83	TC144508	homologue to UP|HSP83_IPONI (P51819) Heat shock protein 83, partial (86%)	SGN-U272026
MICRO.5615.C1	0.709273	1.12676	1.03933	0.544164	0.385794	4.93743	0.744593	Group II	AAF27100	Putative phospatase 2A inhibitor [Arabidopsis thaliana]	TC161483	similar to UP|Q9M9V0_ARATH (Q9M9V0) F6A14.10 protein, partial (62%)	SGN-U270872
MICRO.5585.C2	1.23065	0.635721	1.06933	1.17686	1.04037	0.62217	0.923997	Group IV	NP_193728	unknown protein [Arabidopsis thaliana]	TC147918	similar to UP|Q6DBH7_ARATH (Q6DBH7) At4g19950, partial (61%)	SGN-U272006
MICRO.5566.C1	1.21199	1.07584	1.01934	1.03683	1.08878	0.528314	0.558542	Group V	ABE84610	Transferase [Medicago truncatula]	TC157292	weakly similar to UP|Q9ZTK5_CATRO (Q9ZTK5) Deacetylvindoline 4-O-acetyltransferase , partial (9%)	SGN-U284447
MICRO.556.C3	1.26134	0.902385	3.24396	2.7067	1.02911	1.00099	0.804645	Group VII	AAA34070	endochitinase precursor (EC 3.2.1.14)	TC161928	homologue to GB|1302305A|225412|1302305A chitinase. {Nicotiana sp.} (exp=-1; wgp=0; cg=0) , partial (82%)	SGN-U268804
MICRO.556.C2	1.26195	0.83184	2.6649	3.80147	1.50228	0.678672	0.734081	Group VII	P05315	Endochitinase precursor	TC136158	homologue to UP|CHIT_SOLTU (P05315) Endochitinase precursor , partial (66%)	SGN-U268803
MICRO.556.C10	1.10336	0.962481	2.1751	1.71909	2.41067	0.900806	0.821073	Group VII	P52405	Endochitinase 3 precursor	TC134311	UP|CHI4_SOLTU (P52406) Endochitinase 4 precursor (Fragment) , complete	SGN-U268804
MICRO.556.C1	1.51537	0.698451	1.2343	2.0799	2.49787	1.71451	0.723118	Group VII	Q05538	Basic 30 kDa endochitinase precursor	TC158818	similar to UP|CHIC_LYCES (Q05538) Basic 30 kDa endochitinase precursor , partial (92%)	SGN-U268805
MICRO.5550.C1	1.56804	0.839086	1.08669	0.523331	3.87835	1.01068	0.437309	Group I	NP_564022	catalytic/ hydrolase [Arabidopsis thaliana]	TC158636		SGN-U275049
MICRO.5548.C1	0.470715	0.664074	1.15688	1.2403	1.39268	1.49204	0.831038	Group III	BAF41219	cytochrome P450 [Solanum lycopersicum]	TC145764	similar to UP|Q4ACU3_ZINEL (Q4ACU3) Steroid 22-alpha-hydroxylase, partial (42%)	SGN-U268688
MICRO.554.C1	0.833705	0.81553	0.961581	0.642502	0.618464	2.14923	1.20044	Group II	NP_565823	unknown protein [Arabidopsis thaliana]	TC135425	similar to UP|Q84T82_ORYSA (Q84T82) Expressed protein, partial (59%)	SGN-U274795
MICRO.5534.C1	0.835014	0.989207	0.665517	1.24142	0.61403	1.52084	0.822636	Group II	ABB16969	unknown [Solanum tuberosum]	TC135437	similar to UP|RL4_PRUAR (Q9XF97) 60S ribosomal protein L4 (L1), partial (93%)	SGN-U272264
MICRO.5533.C2	2.3282	0.936828	4.54306	3.84834	0.913876	1.29152	1.69773	Group VI	NP_001044454	Os01g0783500 [Oryza sativa (japonica cultivar-group)]	TC146863	UP|Q6WBY1_SOLTU (Q6WBY1) Anti-bacterial protein, partial (36%)	SGN-U280855
MICRO.5523.C2	1.82552	1.10619	1.75121	0.762656	1.96784	2.63334	0.930989	Group I	AAK68075	1-aminocyclopropane-1-carboxylate oxidase [Solanum tuberosum]	BI431820	GP|14573461|gb|AAK68075.1 1-aminocyclopropane-1-carboxylate oxidase {Solanum tuberosum}, partial (59%)	SGN-U287276
MICRO.5511.C1	0.537669	0.719203	1.178	0.811414	0.900401	0.442343	1.11636	Group III	NP_566520	UVR3 (UV REPAIR DEFECTIVE 4) [Arabidopsis thaliana]	TC160331	weakly similar to UP|O48652_ARATH (O48652) 6-4 photolyase, partial (27%)	SGN-U282418
MICRO.5481.C2	1.20951	1.14491	0.866143	0.872858	0.61285	0.504981	0.978124	Group V	NP_001046473	Os02g0257300 [Oryza sativa (japonica cultivar-group)]	TC159095	weakly similar to GB|AAM70579.1|21700911|AY124870 AT4g01050/F2N1_31 {Arabidopsis thaliana} (exp=-1; wgp=0; cg=0), partial (46%)	SGN-U274604
MICRO.5476.C1	0.571509	1.08288	0.914715	0.698364	0.606482	1.14144	0.963778	Group III	BAC43491	putative salt-inducible protein [Arabidopsis thaliana]	TC153010	similar to UP|Q9FSB6_RAPSA (Q9FSB6) 67kD chloroplastic RNA-binding protein, P67.1, partial (50%)	SGN-U274097
MICRO.5444.C1	0.381888	1.49888	0.909498	0.780313	0.817567	0.641217	0.964955	Group III	NP_567820	EMB2726; RNA binding / structural constituent of ribosome / translation elongation factor [Arabidopsis thaliana]	TC145318	homologue to GB|AAL10483.1|15983773|AY056792 AT4g29060/F19B15_90 {Arabidopsis thaliana} (exp=-1; wgp=0; cg=0), partial (5%)	SGN-U281901
MICRO.5440.C1	0.865858	1.09968	1.28226	2.04893	1.61873	0.949359	1.2952	Group VII	NP_194460	ATP binding / carbohydrate binding / kinase/ protein kinase/ protein serine/threonine kinase/ protein-tyrosine kinase/ sugar binding [Arabidopsis thaliana]	TC159085	similar to RF|NP_194460.1|15237047|NM_118864 ATP binding {Arabidopsis thaliana} (exp=-1; wgp=0; cg=0), partial (19%)	SGN-U284979
MICRO.5415.C1	1.12383	0.644193	1.31637	1.70895	1.52734	2.99243	0.602455	Group VI	AAZ08051	wax synthase [Petunia x hybrida]	TC160681		SGN-U285699
MICRO.5399.C1	0.508683	0.662694	1.06741	1.2433	1.1078	0.569225	1.09718	Group III	BAB02652	unnamed protein product [Arabidopsis thaliana]	BQ519426		SGN-U282651
MICRO.5375.C1	0.880604	1.06791	0.921166	0.630566	0.573642	2.34259	0.831276	Group II	NA	NA	BE919666	similar to GB|AAM19824.1|20453166|AY AT3g13860/MCP4_7 {Arabidopsis thaliana;}, partial (14%)	SGN-U294010
MICRO.5360.C1	0.955048	1.61704	1.01811	1.05601	1.72199	0.629636	0.681935	Group V	NA	NA	TC150398		SGN-U288080
MICRO.5327.C4	1.2087	1.21201	1.0652	1.20358	1.77835	1.76614	1.0242	Group I	NP_849715	unknown protein [Arabidopsis thaliana]	TC139374	similar to UP|Q9ASX8_ARATH (Q9ASX8) At1g27760/T22C5_5, partial (31%)	SGN-U277781
MICRO.5312.C1	0.57179	1.15641	0.873834	1.00648	0.554979	1.19164	1.03683	Group II	AAQ72567	mini-chromosome maintenance 7 [Pisum sativum]	TC154285	similar to UP|Q6UEJ2_PEA (Q6UEJ2) Mini-chromosome maintenance 7, partial (53%)	SGN-U280984
MICRO.5307.C1	1.53148	0.818162	1.10599	0.728782	1.90921	1.97988	1.17763	Group I	ABE81770	AUX/IAA protein [Medicago truncatula]	TC153896	weakly similar to GB|AAK55727.1|14190493|AF380646 AT4g32280/F10M6_80 {Arabidopsis thaliana} (exp=-1; wgp=0; cg=0), partial (20%)	SGN-U276575
MICRO.5302.C1	1.64947	0.936411	0.994051	1.26547	1.97727	3.23425	0.387545	Group I	AAZ94182	proteinase inhibitor I precursor [Solanum tuberosum]	TC153135	similar to UP|Q3S492_SOLTU (Q3S492) Proteinase inhibitor I, partial (82%)	SGN-U268434
MICRO.5280.C3	1.53187	0.430801	1.27621	0.985181	1.5067	1.08153	1.94919	Group I	NP_200685	dehydrodolichyl diphosphate synthase [Arabidopsis thaliana]	TC150425	weakly similar to UP|DDPS2_ARATH (Q56Y11) Dehydrodolichyl diphosphate synthase 2 (Dedol-PP synthase 2) , partial (75%)	SGN-U271599
MICRO.5280.C2	1.63225	0.492665	1.26033	0.887225	1.52048	1.80401	1.29188	Group I	NP_200685	dehydrodolichyl diphosphate synthase [Arabidopsis thaliana]	TC150425	weakly similar to UP|DDPS2_ARATH (Q56Y11) Dehydrodolichyl diphosphate synthase 2 (Dedol-PP synthase 2) , partial (75%)	SGN-U271599
MICRO.5263.C1	1.67733	0.835116	1.28253	0.197672	2.86162	0.718138	0.541372	Group IV	AAQ05799	DNA binding protein Rav [Capsicum annuum]	TC154647	similar to UP|Q5NKT3_CAPAN (Q5NKT3) DNA binding protein Rav, partial (34%)	SGN-U281531
MICRO.5251.C1	1.25198	0.839223	1.21195	1.71446	1.14568	2.12959	0.79743	Group VI	NP_973478	ATP binding / kinase/ protein kinase/ protein serine/threonine kinase/ protein-tyrosine kinase [Arabidopsis thaliana]	TC163012	similar to GB|AAK83605.1|15146244|AY049263 At2g17220/T23A1.8 {Arabidopsis thaliana} (exp=-1; wgp=0; cg=0), partial (43%)	SGN-U298612
MICRO.5226.C3	0.642748	0.87751	1.13775	0.565809	0.968572	0.31272	1.46755	Group IV	BAD93688	glucosyltransferase NTGT4 [Nicotiana tabacum]	TC154335	weakly similar to RF|NP_181216.1|15228034|NM_129233 UDP-glycosyltransferase/ transferase, transferring glycosyl groups {Arabidopsis thaliana} (exp=-1; wgp=0; cg=0), partial (66%)	SGN-U272495
MICRO.5201.C1	1.16067	0.919611	1.11236	0.757915	0.638536	0.854042	0.538868	Group V	ABE85099	Strictosidine synthase; Soluble quinoprotein glucose dehydrogenase [Medicago truncatula]	TC158303	weakly similar to UP|Q9VB46_DROME (Q9VB46) CG3373-PA, partial (4%)	SGN-U280932
MICRO.518.C1	1.11788	0.98348	2.40633	2.19557	1.15753	1.00676	1.49131	Group VI	ABI34311	RNA dependent RNA polymerase family protein [Solanum demissum]	TC132786	UP|Q60D38_SOLTU (Q60D38) RNA-directed RNA polymerase, complete	SGN-U271889
MICRO.5178.C1	0.955244	1.45964	0.852622	0.648215	0.658218	0.893563	1.10746	Group II	NP_565301	unknown protein [Arabidopsis thaliana]	TC153429	similar to UP|Q7S1G6_NEUCR (Q7S1G6) Predicted protein, partial (7%)	SGN-U273928
MICRO.5158.C3	1.38076	0.502586	3.44623	2.83888	1.21772	1.57574	1.1671	Group VI	NP_001060795	Os08g0107100 [Oryza sativa (japonica cultivar-group)]	TC157321	similar to UP|Q6DBH7_ARATH (Q6DBH7) At4g19950, partial (9%)	SGN-U279364
MICRO.5151.C2	1.30674	0.824187	1.06314	0.680392	1.65917	2.15505	0.911066	Group I	AAK92735	putative transformer-SR ribonucleoprotein [Arabidopsis thaliana]	TC135198	similar to RF|NP_563787.2|42561780|NM_100609 RNA binding {Arabidopsis thaliana} (exp=-1; wgp=0; cg=0), partial (49%)	SGN-U298635
MICRO.5137.C1	1.22069	1.11457	0.949874	1.00728	0.562347	0.609	0.851133	Group V	CAB88668	histone H2B [Cicer arietinum]	TC144158	homologue to UP|H2B_GOSHI (O22582) Histone H2B, partial (97%)	SGN-U270644
MICRO.5116.C1	0.352315	0.786829	1.08411	1.48894	1.83198	0.664717	2.11328	Group III	AAM64473	unknown [Arabidopsis thaliana]	TC148709	similar to GB|AAP68303.1|31711894|BT008864 At3g16560 {Arabidopsis thaliana} (exp=-1; wgp=0; cg=0), partial (31%)	SGN-U276939
MICRO.5111.C2	0.628284	0.617077	0.95792	0.949101	0.947113	1.24888	1.14114	Group III	BAC42271	unknown protein [Arabidopsis thaliana]	TC133216	weakly similar to UP|SUT42_ARATH (Q8GYH8) Probable sulfate transporter 4.2, partial (32%)	SGN-U294173
MICRO.5103.C1	1.21853	1.28208	0.929548	0.828523	0.649974	0.616416	1.00223	Group V	NP_201325	structural constituent of ribosome [Arabidopsis thaliana]	TC144070	similar to UP|RK29_ARATH (Q9FJP3) 50S ribosomal protein L29, chloroplast precursor, partial (71%)	SGN-U274705
MICRO.51.C2	0.527769	0.800541	0.899019	0.906994	0.518999	0.767277	1.04891	Group III	AAF02776	asparagine synthetase [Helianthus annuus]	TC138750	similar to UP|Q9ZST6_ARATH (Q9ZST6) Asparagine synthetase, partial (48%)	SGN-U296159
MICRO.5078.C3	1.41372	0.937202	2.13421	2.48727	1.51384	1.88039	2.17341	Group VI	AAK43926	putative mitochondrial protein [Arabidopsis thaliana]	TC158949	similar to RF|NP_190663.2|30693380|NM_114954 ATP binding {Arabidopsis thaliana} (exp=-1; wgp=0; cg=0), partial (44%)	SGN-U275732
MICRO.5072.C2	1.25539	0.977464	0.978488	0.576319	1.57235	0.431624	0.521298	Group IV	AAM09517	putative glucosyltransferase [Phaseolus lunatus]	TC153260	weakly similar to UP|ZOX_PHAVU (P56725) Zeatin O-xylosyltransferase (Zeatin O-beta-D-xylosyltransferase) , partial (22%)	SGN-U273695
MICRO.5069.C1	0.821802	0.621051	0.922767	1.07417	1.4855	0.611472	1.01247	Group IV	ABD32912	Ferric reductase-like transmembrane component [Medicago truncatula]	TC156517	weakly similar to UP|Q2HST1_MEDTR (Q2HST1) Ferric reductase-like transmembrane component, partial (27%)	SGN-U280265
MICRO.5054.C1	0.789441	0.924856	0.893276	0.65142	0.623958	0.832173	0.286654	Group V	AAQ54579	dihydroflavonol 4-reductase [Solanum tuberosum]	TC132851	UP|Q6WG03_SOLTU (Q6WG03) Dihydroflavonol 4-reductase, complete	SGN-U276005
MICRO.5031.C1	1.05044	1.10113	0.91222	0.826492	0.588311	0.560214	1.04897	Group V	P82412	Plastid-specific 30S ribosomal protein 3, chloroplast precursor (PSRP-3)	TC144076	similar to UP|RRP3_SPIOL (P82412) Plastid-specific 30S ribosomal protein 3, chloroplast precursor (PSRP-3), partial (53%)	SGN-U275636
MICRO.5023.C1	0.824097	1.0357	0.953581	0.66109	0.601478	2.22342	0.974218	Group II	AAF07830	putative SCO1 protein [Arabidopsis thaliana]	TC134464	weakly similar to UP|SCO1_SCHPO (O42899) Protein sco1, partial (19%)	SGN-U276396
MICRO.5022.C1	0.564811	0.965438	0.872377	1.06637	0.876775	0.373299	1.05364	Group III	ABE86168	Pyridine nucleotide-disulphide oxidoreductase, class I [Medicago truncatula]	TC153520	similar to RF|NP_568205.2|30682558|NM_120955 NADH dehydrogenase/ disulfide oxidoreductase/ oxidoreductase {Arabidopsis thaliana} (exp=-1; wgp=0; cg=0), partial (69%)	SGN-U280836
MICRO.5016.C1	0.647652	0.625383	1.0876	1.01509	0.851901	0.840622	1.23708	Group III	BAA07828	4-coumarate:coenzyme A ligase [Nicotiana tabacum]	TC144149	homologue to UP|4CL2_TOBAC (O24146) 4-coumarate--CoA ligase 2 (4CL 2) (4-coumaroyl-CoA synthase 2) , partial (45%)	SGN-U276387
MICRO.5012.C1	1.13891	1.12726	0.971306	0.811564	0.55797	0.662642	1.08595	Group V	NP_196706	unknown protein [Arabidopsis thaliana]	TC141192	similar to UP|P82715_ARATH (P82715) Thylakoid lumenal 35.8 kDa protein, chloroplast precursor, partial (48%)	SGN-U278618
MICRO.501.C1	0.638925	1.03323	0.91697	0.643349	0.713774	2.33541	0.849251	Group II	NP_564341	NRPA2; DNA binding / DNA-directed RNA polymerase [Arabidopsis thaliana]	CV286621		SGN-U282211
MICRO.5000.C3	0.844485	1.23562	0.972505	0.866308	0.193249	0.390919	1.08034	Group V	P35057	Histone H4	TC156970	GB|AAB94924.1|2746721|AF038387 histone H4 {Capsicum annuum} (exp=-1; wgp=0; cg=0), partial (98%)	SGN-U268361
MICRO.5000.C2	1.23371	1.13147	1.00462	0.931881	0.29293	0.569114	1.29008	Group V	XP_543797	PREDICTED: similar to germinal histone H4 gene [Canis familiaris]	TC157082	homologue to UP|Q676Z9_HYAOR (Q676Z9) Histone H4, partial (89%)	SGN-U268362
MICRO.5000.C1	0.91841	1.18235	1.02263	0.944899	0.174525	0.515713	1.09721	Group V	P35057	Histone H4	TC155929	GB|AAB94924.1|2746721|AF038387 histone H4 {Capsicum annuum} (exp=-1; wgp=0; cg=0), complete	SGN-U268361
MICRO.4995.C1	0.642679	1.12537	0.978708	0.981314	0.660955	0.405232	0.999948	Group V	O49939	Peptidyl-prolyl cis-trans isomerase, chloroplast precursor (40 kDa thylakoid lumen PPIase) (40 kDa thylakoid lumen rotamase)	TC155006	similar to UP|TLP40_SPIOL (O49939) Peptidyl-prolyl cis-trans isomerase, chloroplast precursor (40 kDa thylakoid lumen PPIase) (40 kDa thylakoid lumen rotamase) , partial (33%)	SGN-U279011
MICRO.4983.C1	0.967267	1.07475	0.883465	0.655399	0.345985	1.35554	1.02551	Group II	AAF91282	DNA-binding protein p24 [Solanum tuberosum]	TC138436	UP|Q9LL85_SOLTU (Q9LL85) DNA-binding protein p24, complete	SGN-U273350
MICRO.4951.C1	1.6872	1.57205	1.02602	0.806682	0.830307	0.806425	1.02011	Group V	ABD33136	Heat shock protein DnaJ [Medicago truncatula]	TC137641	similar to UP|Q2HS35_MEDTR (Q2HS35) Heat shock protein DnaJ, N-terminal, partial (49%)	SGN-U280208
MICRO.4937.C1	1.39015	0.919305	0.933671	0.520046	1.19036	0.522333	0.584002	Group IV	AAA80497	unknown	TC157915	similar to UP|Q8W5R3_RAPSA (Q8W5R3) Water-soluble chlorophyll protein, partial (7%)	SGN-U281865
MICRO.4922.C2	0.751966	1.19546	0.914758	0.660468	0.575315	1.65346	0.991447	Group II	P48626	Omega-3 fatty acid desaturase, endoplasmic reticulum	TC140515	similar to UP|Q9ZPP7_PERFR (Q9ZPP7) Omega-3 fatty acid desaturase, partial (41%)	SGN-U273185
MICRO.491.C6	0.57897	0.413657	1.23133	1.03769	1.49704	1.03629	1.10003	Group IV	ABC01913	catalase isozyme 1-like protein [Solanum tuberosum]	TC132814	UP|CATA2_SOLTU (P55312) Catalase isozyme 2 , complete	SGN-U268645
MICRO.491.C3	2.35904	0.988351	1.22348	0.285081	2.8054	0.420915	0.684566	Group IV	NP_201034	unknown protein [Arabidopsis thaliana]	TC143676	similar to UP|Q9LVA8_ARATH (Q9LVA8) Gb|AAB82627.1 (At5g62280), partial (22%)	SGN-U268648
MICRO.491.C1	0.535256	0.438501	1.16271	1.13558	1.5387	1.37862	1.13062	Group III	CAA85470	catalase [Solanum tuberosum]	CN464303	homologue to SP|P49284|CAT1_SOLTU Catalase isozyme 1 (). {Solanum tuberosum;} (EC 1.11.1.6 EC 1.11.1.6), partial (23%)	SGN-U268645
MICRO.4898.C1	0.697495	0.579137	0.887396	0.598516	0.917947	1.87372	1.9149	Group I	AAU03359	adenylyl-sulfate reductase [Lycopersicon esculentum]	TC137807	similar to UP|Q672Q8_LYCES (Q672Q8) Adenylyl-sulfate reductase precursor, partial (62%)	SGN-U269494
MICRO.4890.C1	0.787673	0.757226	2.40331	3.69328	1.07339	1.06273	1.10529	Group VI	BAB16426	EIG-I24 [Nicotiana tabacum]	TC139745	similar to UP|Q9FXS7_TOBAC (Q9FXS7) EIG-I24 protein, complete	SGN-U270759
MICRO.4881.C2	1.53115	0.767727	1.33911	0.816236	2.08071	1.79577	0.496563	Group I	NP_190913	unknown protein [Arabidopsis thaliana]	TC162041	similar to UP|Q9ASW6_ARATH (Q9ASW6) T3B23.2/T3B23.2, partial (85%)	SGN-U275198
MICRO.4881.C1	1.22626	0.739081	1.34089	0.919554	1.89727	1.90232	0.748357	Group I	ABE89044	Conserved hypothetical protein 730 [Medicago truncatula]	TC146544	similar to UP|Q9ASW6_ARATH (Q9ASW6) T3B23.2/T3B23.2, partial (51%)	SGN-U275198
MICRO.4875.C1	1.92688	0.835666	1.14674	1.17549	1.52399	2.28749	0.42965	Group I	BAC23043	pyruvate decarboxylase [Solanum tuberosum]	TC136847	UP|Q8H9C6_SOLTU (Q8H9C6) Pyruvate decarboxylase (Fragment), complete	SGN-U270890
MICRO.4871.C1	0.575723	0.635339	1.01715	0.951728	1.07665	0.502091	1.05753	Group III	NP_565214	unknown protein [Arabidopsis thaliana]	TC150467	similar to UP|Q94BV0_ARATH (Q94BV0) At1g79600/F20B17_3, partial (80%)	SGN-U270987
MICRO.4854.C2	1.25327	0.411504	1.5404	1.91103	1.42823	2.79573	1.36787	Group VI	CAB67121	peroxidase [Solanum lycopersicum]	TC141955	homologue to UP|Q9LWA2_LYCES (Q9LWA2) Peroxidase, partial (78%)	SGN-U269460
MICRO.484.C2	0.458646	0.583651	1.07011	1.11007	1.00273	0.934792	1.20994	Group III	AAC49704	endo-1,4-beta-glucanase [Lycopersicon esculentum]	TC140185	UP|O04890_LYCES (O04890) Endo-1,4-beta-glucanase , complete	SGN-U275744
MICRO.4830.C3	1.09586	0.610459	2.57487	2.26247	0.875666	2.37239	1.25835	Group VI	CAA06412	P69C protein [Solanum lycopersicum]	TC148834	homologue to UP|O65834_LYCES (O65834) P69C protein, partial (29%)	SGN-U288256
MICRO.4830.C2	1.26579	0.659922	2.80683	2.3152	0.950216	1.77223	0.979614	Group VI	CAA07250	serine protease [Solanum lycopersicum]	TC147813	similar to UP|O04678_LYCES (O04678) Subtilisin-like protease (P69B protein), partial (46%)	SGN-U271759
MICRO.4830.C1	0.982653	0.462885	2.97975	2.70023	0.907	1.52957	1.35236	Group VI	CAA06413	P69E protein [Solanum lycopersicum]	TC147813	similar to UP|O04678_LYCES (O04678) Subtilisin-like protease (P69B protein), partial (46%)	SGN-U271759
MICRO.4827.C2	1.52714	0.961046	1.04819	1.05443	0.766015	1.90014	0.943658	Group I	ABO71015	salicylic acid/benzoic acid carboxyl methyltransferase [Datura wrightii]	TC156173	similar to UP|Q9AVG9_ATRBE (Q9AVG9) S-adenosyl-L-methionine:salicylic acid carboxyl methyltransferase, partial (98%)	SGN-U281355
MICRO.4825.C1	0.61373	0.65306	1.07803	1.18614	2.49551	1.25606	1.51066	Group IV	CAC80883	geraniol 10-hydroxylase [Catharanthus roseus]	TC150913	similar to UP|Q8VWZ7_CATRO (Q8VWZ7) Geraniol 10-hydroxylase , partial (31%)	SGN-U273163
MICRO.4812.C1	0.779642	1.01862	0.855703	0.578594	0.449764	1.83834	1.05244	Group II	Q6H601	DEAD-box ATP-dependent RNA helicase 22	TC157432	similar to UP|Q944S1_ARATH (Q944S1) At1g59990/T2K10_4, partial (69%)	SGN-U275794
MICRO.4800.C4	1.27133	0.654149	1.11392	0.459548	0.926593	2.02615	0.845143	Group I	BAD06575	LEDI-5c protein [Lithospermum erythrorhizon]	TC136898	similar to UP|Q76DL0_LITER (Q76DL0) LEDI-5c protein, partial (79%)	SGN-U269502
MICRO.4800.C1	0.642422	0.571604	1.04719	0.72849	1.08242	1.55808	1.07618	Group III	EAZ36383	hypothetical protein OsJ_019866 [Oryza sativa (japonica cultivar-group)]	TC154135	similar to UP|O23777_CATRO (O23777) Old-yellow-enzyme homolog, partial (16%)	SGN-U269503
MICRO.4795.C1	1.02585	1.29876	0.938107	1.70176	2.93568	0.652079	0.91414	Group VII	CAB87858	putative protein [Arabidopsis thaliana]	TC161043	weakly similar to UP|Q4VGM5_CHLRE (Q4VGM5) Low photochemical bleaching 1 protein, partial (9%)	SGN-U297744
MICRO.4770.C2	0.438235	1.09583	1.13364	1.1683	1.51072	0.664354	1.10514	Group III	EAZ34230	hypothetical protein OsJ_017713 [Oryza sativa (japonica cultivar-group)]	TC153015	weakly similar to UP|O04567_ARATH (O04567) T7N9.25 (At1g27190), partial (24%)	SGN-U277008
MICRO.477.C2	0.645985	0.826359	1.16796	0.816583	0.997841	0.450856	1.0675	Group III	P54260	Aminomethyltransferase, mitochondrial precursor (Glycine cleavage system T protein) (GCVT)	TC133165	UP|GCST_SOLTU (P54260) Aminomethyltransferase, mitochondrial precursor (Glycine cleavage system T protein) (GCVT) , complete	SGN-U270976
MICRO.4761.C2	1.0513	0.971621	0.896084	0.923945	0.434365	0.508111	0.982182	Group V	ABB59463	histone H1F [Nicotiana tabacum]	TC141614	similar to UP|Q2XNF9_TOBAC (Q2XNF9) Histone H1F, partial (86%)	SGN-U271874
MICRO.4752.C1	0.472105	0.58349	0.814888	0.984403	0.975547	0.570884	0.91855	Group III	AAK72885	putative lipid acyl hydrolase [Oryza sativa]	TC159590	similar to UP|Q8H5D4_ORYSA (Q8H5D4) Lipid acyl hydrolase-like protein, partial (31%)	SGN-U285826
MICRO.473.C6	0.53733	1.01638	0.956544	0.59071	0.581132	1.49254	1.11771	Group II	P14728	Hypothetical 82 kDa avirulence protein in avrBs3 region	CV434762		SGN-U272821
MICRO.4700.C1	1.16287	1.3436	0.876411	0.641189	0.813761	0.499326	0.993003	Group V	NP_174971	unknown protein [Arabidopsis thaliana]	TC136585	similar to UP|Q9SHN5_ARATH (Q9SHN5) F7F22.5, partial (67%)	SGN-U282663
MICRO.4683.C1	1.44113	0.797765	0.901115	0.454784	2.8269	5.49829	0.12883	Group I	BAA96501	cysteine protease [Nicotiana tabacum]	TC153140	similar to UP|Q9LRI2_TOBAC (Q9LRI2) Cysteine protease, partial (73%)	SGN-U271010
MICRO.4676.C1	2.16073	1.54842	1.03441	1.20653	0.496164	1.46918	0.683031	Group I	NA	NA	TC159487		SGN-U280776
MICRO.4640.C1	0.988129	1.16602	1.01806	0.612624	0.665791	3.64084	0.864605	Group II	ABE78310	Helicase, C-terminal [Medicago truncatula]	TC136067	similar to UP|Q84TG1_ARATH (Q84TG1) At3g09720, partial (72%)	SGN-U278426
MICRO.4585.C1	1.13959	0.638879	0.946727	0.56694	2.28917	1.65609	0.0999905	Group I	P31212	Threonine dehydratase biosynthetic (Threonine deaminase) (TD)	TC148229	homologue to UP|THD1_SOLTU (P31212) Threonine dehydratase biosynthetic (Threonine deaminase) (TD) (Fragment) , complete	SGN-U274897
MICRO.4579.C2	1.2086	1.59438	0.959498	1.57882	1.33954	0.733558	1.19533	Group VIII	NA	NA	TC143796	homologue to UP|Q8VYK7_ARATH (Q8VYK7) AT4g16520/dl4285c (Autophagy 8f), partial (26%)	SGN-U281243
MICRO.4562.C1	1.6516	0.905548	0.881695	0.708068	1.39545	0.414009	0.486887	Group IV	AAO61856	glutathione S-transferase Z1 [Malva pusilla]	TC142946	weakly similar to UP|GSTZ1_ARATH (Q9ZVQ3) Glutathione S-transferase zeta-class 1 (AtGSTZ1) (Maleylacetone isomerase) (MAI) , partial (94%)	SGN-U269759
MICRO.4551.C2	0.844483	1.24608	0.968314	0.994681	0.623642	0.66428	0.930263	Group V	NP_568200	unknown protein [Arabidopsis thaliana]	BQ516198		SGN-U273258
MICRO.4547.C1	0.537373	0.623713	1.02557	0.799181	1.11075	0.717065	1.17686	Group IV	AAK84478	unknown [Lycopersicon esculentum]	TC146369		SGN-U283105
MICRO.4541.C1	0.45552	0.728117	0.990625	0.951082	1.2607	0.490561	1.27145	Group III	ABE90425	ATP-dependent DNA ligase; Metal-dependent phosphohydrolase, HD region; TGS; DNA polymerase III clamp loader subunit, C-terminal [Medicago truncatula]	TC142563	weakly similar to UP|Q97GU1_CLOAB (Q97GU1) RelA/SpoT protein, (P)ppGpp synthetase/pyrophosphohydrolases, partial (9%)	SGN-U280050
MICRO.4526.C2	0.931268	1.14304	0.917295	0.552131	0.479148	3.90053	0.694458	Group II	NP_191425	structural constituent of ribosome [Arabidopsis thaliana]	TC152754	similar to RF|NP_191425.1|15231102|NM_115728 structural constituent of ribosome {Arabidopsis thaliana} (exp=-1; wgp=0; cg=0), partial (11%)	SGN-U271786
MICRO.4520.C1	0.85646	0.640766	0.835236	0.738142	1.27987	0.849452	0.5227	Group IV	AAM61194	unknown [Arabidopsis thaliana]	TC141529	weakly similar to RF|NP_188239.1|15233307|NM_112489 transporter {Arabidopsis thaliana} (exp=-1; wgp=0; cg=0), partial (23%)	SGN-U276989
MICRO.4515.C2	1.44324	1.03811	1.42389	1.55355	1.29653	2.15564	1.0102	Group VI	NP_564841	calcium ion binding [Arabidopsis thaliana]	TC147322	weakly similar to GB|AAM26663.1|20856383|AY101542 At1g64850/F13O11_15 {Arabidopsis thaliana} (exp=-1; wgp=0; cg=0), partial (84%)	SGN-U275409
MICRO.4505.C1	0.989011	0.680109	1.09748	0.92965	1.2809	0.586559	0.56024	Group IV	NP_200008	FAD binding / aldehyde-lyase/ oxidoreductase/ oxidoreductase, acting on CH-OH group of donors [Arabidopsis thaliana]	TC147236	weakly similar to UP|Q8VYV8_ARATH (Q8VYV8) At1g12570/T12C24_9, partial (63%)	SGN-U271306
MICRO.4494.C2	1.10943	1.09473	0.92459	0.879141	0.519282	0.533712	0.968761	Group V	NP_568306	metal ion binding [Arabidopsis thaliana]	TC141114		SGN-U271307
MICRO.4494.C1	1.06628	1.2539	0.934858	1.01803	0.550678	0.552106	0.856172	Group V	NP_568306	metal ion binding [Arabidopsis thaliana]	TC138007		SGN-U288119
MICRO.4477.C1	1.01533	0.549502	1.12045	0.618181	0.737842	0.35866	0.990456	Group IV	AAK54465	cold-induced glucosyl transferase [Solanum sogarandinum]	TC142809	homologue to UP|Q94IP3_SOLSG (Q94IP3) Cold-induced glucosyl transferase, partial (42%)	SGN-U279206
MICRO.4416.C1	1.35333	1.41233	1.31371	0.660251	2.05991	1.02294	0.510815	Group I	NA	NA	BG600174		SGN-U269146
MICRO.4359.C4	1.36667	0.893735	1.00532	1.45157	2.28967	2.06284	0.369617	Group I	CAC40756	putative miraculin [Atropa belladonna]	TC141173	UP|CPI4_SOLTU (P58602) Cysteine protease inhibitor 4 (PCPI-23) (Fragment), partial (91%)	SGN-U269055
MICRO.4359.C1	2.3931	0.875114	1.16134	1.49455	3.08651	2.44922	0.242304	Group I	CAC40756	putative miraculin [Atropa belladonna]	TC139130	UP|CPI4_SOLTU (P58602) Cysteine protease inhibitor 4 (PCPI-23) (Fragment), partial (91%)	SGN-U269054
MICRO.4320.C1	1.35754	0.635146	1.09281	2.16744	6.54888	1.98859	1.29272	Group I	ABE84859	Phosphofructokinase [Medicago truncatula]	TC149299	similar to RF|NP_568842.1|18423885|NM_125046 6-phosphofructokinase {Arabidopsis thaliana} (exp=-1; wgp=0; cg=0), partial (91%)	SGN-U278098
MICRO.431.C4	1.00833	1.23629	0.857916	0.602535	0.497764	0.709019	0.814425	Group II	CAA40361	proline rich protein [Solanum lycopersicum]	TC136770	homologue to UP|PRF1_LYCES (Q00451) 36.4 kDa proline-rich protein, partial (95%)	SGN-U268850
MICRO.4293.C1	0.394593	0.75666	1.00064	1.28833	0.726468	1.88552	1.57987	Group III	AAS75127	GSDL-motif lipase [Agave americana]	TC153343	similar to UP|Q5J7N0_AGAAM (Q5J7N0) GSDL-motif lipase, partial (37%)	SGN-U286215
MICRO.4288.C9	2.0582	0.718791	0.890472	1.07257	2.85244	2.12159	0.286712	Group I	Q00652	Cysteine protease inhibitor 9 precursor (PKIX) (pT1)	TC137142	homologue to UP|Q8H9D6_SOLTU (Q8H9D6) Kunitz-type trypsin inhibitor (Fragment), partial (98%)	SGN-U280995
MICRO.4288.C3	2.00847	0.715431	0.812858	1.06606	2.86399	1.9302	0.2547	Group I	AAL60242	putative Kunitz-type tuber invertase inhibitor precursor [Solanum tuberosum]	TC159602	UP|CPI8_SOLTU (O24384) Cysteine protease inhibitor 8 precursor (PCPI-8) (Pcpi8) (Fragment), partial (96%)	SGN-U280995
MICRO.4288.C16	1.73256	0.859001	0.924149	1.05662	1.97263	1.16716	0.579316	Group I	AAL60243	putative Kunitz-type tuber invertase inhibitor precursor [Solanum tuberosum]	TC138019	similar to UP|CPI8_SOLTU (O24384) Cysteine protease inhibitor 8 precursor (PCPI-8) (Pcpi8) (Fragment), partial (94%)	SGN-U280998
MICRO.4288.C13	2.68076	0.701834	0.942235	1.14574	3.17105	1.79549	0.26632	Group I	P20347	Cysteine protease inhibitor 1 precursor (PCPI 8.3) (P340) (P34021)	TC151402	similar to UP|CPI1_SOLTU (P20347) Cysteine protease inhibitor 1 precursor (PCPI 8.3) (P340) (P34021), partial (97%)	SGN-U280992
MICRO.4281.C1	1.31568	0.526579	1.01353	0.828102	0.897832	1.82546	1.50316	Group I	P43281	S-adenosylmethionine synthetase 2 (Methionine adenosyltransferase 2) (AdoMet synthetase 2)	TC133218	homologue to UP|METL_LYCES (P43281) S-adenosylmethionine synthetase 2 (Methionine adenosyltransferase 2) (AdoMet synthetase 2) , partial (98%)	SGN-U270238
MICRO.4267.C1	0.961496	1.08462	0.864182	0.903905	0.662065	0.449029	0.861395	Group V	P09043	Glyceraldehyde-3-phosphate dehydrogenase A, chloroplast precursor (NADP-dependent glyceraldehydephosphate dehydrogenase subunit A)	TC133976	homologue to UP|G3PA_TOBAC (P09043) Glyceraldehyde-3-phosphate dehydrogenase A, chloroplast precursor (NADP-dependent glyceraldehydephosphate dehydrogenase subunit A) (Fragment) , partial (97%)	SGN-U268660
MICRO.4263.C4	1.85202	0.865255	1.00889	0.672688	0.906262	2.62858	1.32615	Group I	NP_001059028	Os07g0178600 [Oryza sativa (japonica cultivar-group)]	TC145466	similar to RF|NP_190759.1|15231071|NM_115050 AT-HSFA7A; DNA binding {Arabidopsis thaliana} (exp=-1; wgp=0; cg=0), partial (28%)	SGN-U272487
MICRO.4248.C1	1.80378	0.735519	1.29744	1.37593	1.70529	1.32185	1.10355	Group I	ABE86405	hypothetical protein MtrDRAFT_AC156827g15v2 [Medicago truncatula]	TC134833	similar to UP|Q3E9G1_ARATH (Q3E9G1) Protein At5g18130, partial (12%)	SGN-U272663
MICRO.4247.C1	0.512272	0.77224	0.956204	1.02643	0.874993	0.435582	1.09124	Group III	AAM65181	unknown [Arabidopsis thaliana]	TC155030	similar to RF|NP_564388.1|18398254|NM_102942 rhodopsin-like receptor {Arabidopsis thaliana} (exp=-1; wgp=0; cg=0), partial (29%)	SGN-U275923
MICRO.4219.C1	1.6257	0.721565	1.21979	1.30786	1.15805	2.65093	0.80563	Group I	AAZ08051	wax synthase [Petunia x hybrida]	TC152037	weakly similar to UP|Q9FK03_ARATH (Q9FK03) Emb|CAB66399.1, partial (14%)	SGN-U276458
MICRO.4203.C3	0.620148	1.14396	1.02507	1.17941	0.932561	0.339952	0.714231	Group III	ABE77793	E-class P450, group I [Medicago truncatula]	CX161987		SGN-U271091
MICRO.4199.C1	0.792955	0.91883	0.905629	1.27243	1.38392	0.307582	0.562483	Group V	NP_198322	carboxylic ester hydrolase/ hydrolase, acting on ester bonds [Arabidopsis thaliana]	TC134077	similar to UP|Q5J7N0_AGAAM (Q5J7N0) GSDL-motif lipase, partial (74%)	SGN-U269210
MICRO.4172.C4	0.759859	0.843503	1.54434	1.67364	1.19821	1.10374	1.33863	Group VI	AAV33691	Hcr9-OR2C [Lycopersicon pimpinellifolium]	TC144863	similar to UP|Q4VSU2_LYCPM (Q4VSU2) Hcr9-OR3A, partial (31%)	SGN-U271588
MICRO.4170.C2	1.16841	0.76774	0.879356	0.902046	0.465368	6.30787	3.41034	Group I	CAH60891	carbonic anhydrase [Solanum lycopersicum]	TC156131	homologue to UP|Q5NE20_LYCES (Q5NE20) Carbonic anhydrase , partial (78%)	SGN-U269416
MICRO.4153.C1	0.661493	0.90275	1.03095	0.966316	0.58253	0.608834	1.11498	Group III	NP_196419	DNA binding / nucleic acid binding [Arabidopsis thaliana]	TC155897	similar to RF|NP_200908.1|15239494|NM_125493 DNA binding {Arabidopsis thaliana} (exp=-1; wgp=0; cg=0), partial (19%)	SGN-U281554
MICRO.4152.C2	1.36915	0.544179	1.28243	1.08765	1.33183	1.74796	2.15469	Group I	AAG00902	xyloglucan endotransglycosylase LeXET2 [Lycopersicon esculentum]	TC155084	homologue to UP|Q9FZ05_LYCES (Q9FZ05) Xyloglucan endotransglycosylase LeXET2, partial (40%)	SGN-U272385
MICRO.4141.C1	0.568745	0.593376	0.965719	1.09186	1.31095	0.633999	0.941859	Group IV	O49074	Ribulose bisphosphate carboxylase/oxygenase activase, chloroplast precursor (RuBisCO activase) (RA)	TC139431	homologue to UP|RCA_LYCPN (O49074) Ribulose bisphosphate carboxylase/oxygenase activase, chloroplast precursor (RuBisCO activase) (RA), partial (95%)	SGN-U268397
MICRO.4133.C1	0.99734	0.54972	0.939799	0.822976	1.4936	1.10084	0.626761	Group I	AAM65485	putative GDSL-motif lipase/hydrolase [Arabidopsis thaliana]	TC152758	similar to RF|NP_178536.1|15228157|NM_126488 carboxylic ester hydrolase/ hydrolase, acting on ester bonds {Arabidopsis thaliana} (exp=-1; wgp=0; cg=0), partial (76%)	SGN-U272509
MICRO.412.C1	0.473731	0.494064	0.933404	1.24429	1.00338	0.879178	1.39178	Group III	Q40546	Pyruvate kinase isozyme G, chloroplast precursor	TC134739	homologue to UP|KPYG_TOBAC (Q40546) Pyruvate kinase isozyme G, chloroplast precursor , partial (48%)	SGN-U280391
MICRO.4095.C1	0.665281	0.831076	1.08382	0.550035	0.597223	3.1023	1.17132	Group II	NP_195217	ATP binding / ATP-dependent helicase/ helicase/ nucleic acid binding [Arabidopsis thaliana]	TC138122	similar to UP|Q9SW44_ARATH (Q9SW44) RNA helicase (RH16), partial (26%)	SGN-U274356
MICRO.4091.C1	2.31176	1.22916	9.56065	5.39406	0.64245	0.869987	2.44309	Group VI	AAF61863	DNA-binding protein 3 [Nicotiana tabacum]	TC151567	similar to UP|Q9M6E1_TOBAC (Q9M6E1) DNA-binding protein 3, partial (36%)	SGN-U272611
MICRO.4071.C1	0.564137	0.992709	0.886524	0.756993	0.554237	0.762173	0.978292	Group III	NP_189194	amidase/ glutamyl-tRNA(Gln) amidotransferase [Arabidopsis thaliana]	TC146388	similar to UP|Q9FVA6_ARATH (Q9FVA6) Glu-tRNA(Gln) amidotransferase subunit A, partial (35%)	SGN-U274503
MICRO.4054.C3	0.625826	0.824387	0.885647	0.706	0.715647	0.42119	0.791296	Group V	CAD40980	OSJNBa0072F16.5 [Oryza sativa (japonica cultivar-group)]	TC147448	similar to UP|Q3E8K3_ARATH (Q3E8K3) Protein At5g39830, partial (39%)	SGN-U286816
MICRO.4026.C1	0.631473	1.03298	1.05906	1.13462	1.31158	0.58132	1.09151	Group III	NP_187479	unknown protein [Arabidopsis thaliana]	TC154513	similar to UP|Q494P4_ARATH (Q494P4) At2g40070, partial (8%)	SGN-U277858
MICRO.4006.C1	1.20504	1.04617	1.03503	1.19812	1.71572	1.62064	0.777121	Group I	NP_189598	unknown protein [Arabidopsis thaliana]	TC135633	similar to UP|Q94F39_ARATH (Q94F39) AT3g29575/MWE13_2, partial (32%)	SGN-U277769
MICRO.4.C3	1.16604	0.640726	1.029	0.869826	1.07336	1.44095	0.392966	Group I	AAA53547	polygalacturonase inhibitor protein	TC152153	weakly similar to UP|Q8S990_9ROSI (Q8S990) Polygalacturonase-inhibiting protein, partial (53%)	SGN-U272017
MICRO.399.C1	1.8536	0.866363	1.05534	1.25778	1.53216	1.56342	0.891309	Group I	NP_001063029	Os09g0373000 [Oryza sativa (japonica cultivar-group)]	TC144899	similar to UP|Q6H4I2_ORYSA (Q6H4I2) Brain protein 44-like, partial (83%)	SGN-U269702
MICRO.3962.C1	0.873135	1.2964	1.13834	1.41963	2.44775	1.99439	1.33791	Group I	ABJ91227	CBL-interacting protein kinase 21 [Populus trichocarpa]	TC134815	similar to GB|AAL16166.1|16226430|AF428398 At2g30360/T9D9.17 {Arabidopsis thaliana} (exp=-1; wgp=0; cg=0), partial (66%)	SGN-U272875
MICRO.3906.C6	1.5925	1.03044	1.01988	1.07229	0.847792	3.47965	0.510778	Group I	Q8H9B6	Caffeoyl-CoA O-methyltransferase (Trans-caffeoyl-CoA 3-O-methyltransferase) (CCoAMT) (CCoAOMT)	TC154187	homologue to UP|CAMT_SOLTU (Q8H9B6) Caffeoyl-CoA O-methyltransferase (Trans-caffeoyl-CoA 3-O-methyltransferase) (CCoAMT) (CCoAOMT) , partial (40%)	SGN-U271688
MICRO.390.C1	0.757748	1.28086	0.944865	1.22808	2.34805	0.599113	2.01182	Group IV	BAB93534	nitrate reductase [Solanum tuberosum]	TC136357	UP|Q8LT13_SOLTU (Q8LT13) Nitrate reductase, complete	SGN-U271417
MICRO.3899.C2	1.83309	0.81175	1.06087	1.1591	1.30023	1.73286	0.80943	Group I	CAH67099	H0818E04.16 [Oryza sativa (indica cultivar-group)]	TC151463	weakly similar to UP|DYR_SCHPO (P36591) Dihydrofolate reductase , partial (5%)	SGN-U275581
MICRO.3858.C2	0.739126	1.10702	0.948415	0.641849	0.658207	2.22247	0.915981	Group II	NA	NA	TC135902	weakly similar to UP|O23149_ARATH (O23149) Membrane-associated salt-inducible protein like (Fragment), partial (61%)	SGN-U295940
MICRO.3839.C1	0.848028	1.21862	0.857411	0.606136	0.349525	1.67041	0.974857	Group II	AAF80216	Contains a weak similarity to an unknown protein T16B12.4 gi|3746061 from Arabidopsis thaliana BAC T16B12 gb|AC005311. ESTs gb|AI999279, gb|Z30507, gb|AI997722, gb|Z26742 come from this gene	TC141890	similar to UP|Q9LNC8_ARATH (Q9LNC8) F9P14.5 protein, partial (24%)	SGN-U275437
MICRO.3837.C2	1.1321	1.16892	1.36306	1.64184	2.04318	2.0031	0.744825	Group I	AAF37266	transcription factor [Vitis riparia]	TC135779	similar to UP|Q9M607_VITRI (Q9M607) Transcription factor, partial (33%)	SGN-U286303
MICRO.3821.C1	0.594873	0.82751	1.04061	0.646615	1.35693	0.991484	0.835915	Group IV	ABB89717	EIN3-binding F-box protein 1 [Solanum lycopersicum]	TC146013	homologue to UP|Q2PQJ1_LYCES (Q2PQJ1) EIN3-binding F-box protein 1, partial (87%)	SGN-U270481
MICRO.382.C6	1.07491	0.880895	0.962721	1.2206	1.50234	1.7205	1.23669	Group I	Q96471	S-adenosylmethionine decarboxylase proenzyme (AdoMetDC) (SamDC) [Contains: S-adenosylmethionine decarboxylase alpha chain; S-adenosylmethionine decarboxylase beta chain]	TC152884	similar to UP|DCAM_IPONI (Q96471) S-adenosylmethionine decarboxylase proenzyme (AdoMetDC) (SamDC) [Contains: S-adenosylmethionine decarboxylase alpha chain; S-adenosylmethionine decarboxylase beta chain] , partial (94%)	SGN-U268554
MICRO.381.C1	0.845195	1.10099	0.946763	1.52862	1.3408	1.11342	1.84243	Group IV	P49297	Isocitrate lyase (Isocitrase) (Isocitratase) (ICL)	TC142527	homologue to UP|ACEA_LYCES (P49297) Isocitrate lyase (Isocitrase) (Isocitratase) (ICL) , complete	SGN-U276649
MICRO.3798.C1	1.22653	0.896906	1.4525	1.71832	0.989472	1.50441	0.96742	Group VI	NP_566539	catalytic [Arabidopsis thaliana]	TC141992	similar to GB|AAN28858.1|23505997|AY143919 At3g16190/MYA6_2 {Arabidopsis thaliana} (exp=-1; wgp=0; cg=0), partial (93%)	SGN-U274739
MICRO.3793.C1	0.515245	1.86489	1.20195	1.31458	0.54327	0.644276	0.60289	Group V	NP_195053	CDC20.1; signal transducer [Arabidopsis thaliana]	TC142053	similar to UP|Q9SZA4_ARATH (Q9SZA4) WD-repeat protein-like protein, partial (80%)	SGN-U270302
MICRO.3774.C1	0.727172	1.37291	0.95152	0.640997	0.750626	0.39213	1.04266	Group V	AAF17670	F20B24.8 [Arabidopsis thaliana]	TC134943	similar to UP|Q9SGY5_ARATH (Q9SGY5) F20B24.8, partial (40%)	SGN-U277134
MICRO.3773.C3	0.731573	0.844546	2.21492	1.7784	0.894947	1.55746	1.06826	Group VI	NA	NA	TC139926		SGN-U270250
MICRO.3772.C2	0.890493	0.863983	1.03819	0.598779	0.654155	1.99363	0.887012	Group II	NP_200420	unknown protein [Arabidopsis thaliana]	TC150701	weakly similar to UP|O76740_DICDI (O76740) Cytochrome c oxidase assembly protein, partial (29%)	SGN-U274444
MICRO.3746.C11	0.277828	0.626803	0.869143	0.970754	1.04023	0.903535	0.985662	Group III	AAG22605	aldehyde oxidase [Lycopersicon esculentum]	TC154211	homologue to UP|Q9FV25_LYCES (Q9FV25) Aldehyde oxidase , partial (17%)	SGN-U294059
MICRO.3714.C1	0.617758	0.953329	1.13017	0.716963	0.665513	1.5301	0.982145	Group II	NA	NA	TC155759	homologue to UP|Q46JF2_PROMT (Q46JF2) NAD(P)H-quinone oxidoreductase NdhF subunit, precursor, partial (12%)	SGN-U283038
MICRO.3710.C1	0.443091	1.11187	0.858067	1.11864	0.295203	0.604611	0.887833	Group V	CAA05207	DNA (cytosine-5)-methyltransferase [Solanum lycopersicum]	TC142063	homologue to UP|O49889_LYCES (O49889) DNA (Cytosine-5)-methyltransferase , partial (13%)	SGN-U275414
MICRO.3709.C1	0.554183	1.27284	0.797603	0.701152	0.56809	1.44505	1.02909	Group II	NP_194849	DNA binding / DNA topoisomerase/ DNA topoisomerase type I/ nucleic acid binding [Arabidopsis thaliana]	TC144427	similar to RF|NP_194849.2|42567296|NM_119270 DNA binding {Arabidopsis thaliana} (exp=-1; wgp=0; cg=0), partial (16%)	SGN-U280061
MICRO.37.C8	1.42755	0.640281	1.34142	0.632359	0.89275	3.12185	2.18368	Group I	AAF79822	T6D22.2 [Arabidopsis thaliana]	TC133373	elongation factor [Solanum tuberosum]	SGN-U277730
MICRO.37.C15	1.19928	0.631525	1.42772	0.820713	0.936435	1.77656	2.31921	Group I	AAF79822	T6D22.2 [Arabidopsis thaliana]	TC155606	homologue to UP|P93769_TOBAC (P93769) Elongation factor-1 alpha, partial (92%)	SGN-U277730
MICRO.3654.C1	0.434787	1.14187	0.906165	0.735832	0.556599	2.21653	0.834071	Group II	NP_565435	ATP binding / ATPase/ nucleoside-triphosphatase/ nucleotide binding [Arabidopsis thaliana]	TC155007	similar to RF|NP_565435.1|18398708|NM_127390 ATP binding {Arabidopsis thaliana} (exp=-1; wgp=0; cg=0), partial (20%)	SGN-U282598
MICRO.3636.C1	0.626803	0.964101	1.2692	1.63904	1.06461	2.19022	0.968996	Group VI	NP_178731	ATP binding / kinase/ protein kinase/ protein serine/threonine kinase/ protein-tyrosine kinase [Arabidopsis thaliana]	TC154897	similar to RF|NP_178731.2|22325532|NM_126690 ATP binding {Arabidopsis thaliana} (exp=-1; wgp=0; cg=0), partial (72%)	SGN-U277041
MICRO.3607.C2	0.944092	0.648267	0.829915	0.57998	1.89814	3.91581	0.12916	Group I	ABD65173	acetylornithine deacetylase, putative [Brassica oleracea]	TC156289	similar to RF|NP_193517.3|42566909|NM_117892 metallopeptidase {Arabidopsis thaliana} (exp=-1; wgp=0; cg=0), partial (34%)	SGN-U270245
MICRO.3605.C2	1.30511	0.757514	0.968921	0.66542	1.72905	0.661791	0.713414	Group IV	AAF64174	phenylcoumaran benzylic ether reductase homolog Fi1 [Forsythia x intermedia]	TC142685	similar to UP|Q9M527_FORIN (Q9M527) Phenylcoumaran benzylic ether reductase homolog Fi2, partial (80%)	SGN-U271299
MICRO.3594.C1	0.6057	1.13089	1.0222	0.978165	1.11549	0.433642	1.03968	Group III	ABJ91220	CBL-interacting protein kinase 13 [Populus trichocarpa]	TC158895	similar to UP|Q93VD3_ARATH (Q93VD3) At1g30270/F12P21_6 (CBL-interacting protein kinase 23), partial (30%)	SGN-U277830
MICRO.3582.C1	0.592653	0.721189	1.01986	1.09535	1.19886	0.594613	1.24008	Group III	ABE79303	Rieske [2Fe-2S] region [Medicago truncatula]	TC134623	similar to GB|AAL11569.1|15983402|AF424575 AT4g25650/L73G19_30 {Arabidopsis thaliana} (exp=-1; wgp=0; cg=0), partial (32%)	SGN-U276519
MICRO.357.C2	1.07769	1.58132	1.01358	0.873688	0.752696	1.53961	0.942098	Group II	ABA81876	unknown [Solanum tuberosum]	TC135650	similar to UP|EF1G2_ORYSA (Q6YW46) Elongation factor 1-gamma 2 (EF-1-gamma 2) (eEF-1B gamma 2), partial (89%)	SGN-U268260
MICRO.3546.C1	0.466423	0.596557	1.00897	1.07993	1.07239	0.929584	1.12352	Group III	Q9C5X3	SNARE-interacting protein KEULE	TC145918	similar to RF|NP_563905.1|18391384|NM_101108 KEU (KEULE); protein transporter {Arabidopsis thaliana} (exp=-1; wgp=0; cg=0), partial (39%)	SGN-U293818
MICRO.3542.C1	1.24524	1.12349	1.85175	1.7532	1.07219	2.01229	1.14415	Group VI	ABE78019	Concanavalin A-like lectin/glucanase [Medicago truncatula]	TC148642	similar to RF|NP_563816.1|18390896|NM_100718 CRT3 (CALRETICULIN 3); calcium ion binding {Arabidopsis thaliana} (exp=-1; wgp=0; cg=0), partial (85%)	SGN-U271320
MICRO.3541.C2	0.960516	5.05145	1.51284	18.1535	127.843	1.617	0.464731	Group VII	NP_566159	SRG3 (SENESCENCE-RELATED GENE 3); glycerophosphodiester phosphodiesterase [Arabidopsis thaliana]	TC157794	similar to UP|Q84WI7_ARATH (Q84WI7) Expressed protein, partial (59%)	SGN-U275745
MICRO.3502.C3	2.07623	1.1204	1.00658	0.642423	2.04662	1.07826	0.75301	Group I	ABC69422	CYP72A58 [Nicotiana tabacum]	TC152548	weakly similar to UP|Q2MJ18_MEDTR (Q2MJ18) Cytochrome P450 monooxygenase CYP72B, partial (27%)	SGN-U269781
MICRO.350.C1	0.76737	0.601871	1.02591	0.596473	1.12298	1.6108	0.757289	Group III	Q07511	Formate dehydrogenase, mitochondrial precursor (NAD-dependent formate dehydrogenase) (FDH)	TC144349	UP|FDH_SOLTU (Q07511) Formate dehydrogenase, mitochondrial precursor (NAD-dependent formate dehydrogenase) (FDH) , complete	SGN-U268611
MICRO.3470.C2	0.656488	0.644344	0.93628	1.15871	1.33577	1.07844	0.939462	Group III	P41153	Heat shock factor protein HSF8 (Heat shock transcription factor 8) (HSTF 8) (Heat stress transcription factor)	TC133419	similar to UP|HSF8_LYCPE (P41153) Heat shock factor protein HSF8 (Heat shock transcription factor 8) (HSTF 8) (Heat stress transcription factor), partial (49%)	SGN-U274725
MICRO.3462.C1	1.01724	0.638837	1.0567	1.03148	1.74685	1.59024	1.0986	Group I	ABB87123	aspartic protease precursor-like [Solanum tuberosum]	TC133585	UP|Q6B9W9_SOLTU (Q6B9W9) Asp, complete	SGN-U270135
MICRO.3459.C1	0.583512	0.666249	1.00779	1.06584	0.670337	0.520335	1.44913	Group IV	CAD12839	putative metallophosphatase [Lupinus luteus]	TC155590	weakly similar to UP|Q2QN73_ORYSA (Q2QN73) Diphosphonucleotide phosphatase 1, partial (31%)	SGN-U279911
MICRO.344.C3	1.30821	0.760658	0.799564	0.51567	1.53701	0.557202	0.392248	Group I	NA	NA	TC139639	similar to UP|Q66YT8_LYCES (Q66YT8) DWARF1/DIMINUTO, partial (98%)	SGN-U268686
MICRO.344.C1	0.823576	0.707279	0.881962	0.515936	1.48813	0.431014	0.39944	Group IV	AAT90376	DWARF1/DIMINUTO [Lycopersicon esculentum]	TC139639	similar to UP|Q66YT8_LYCES (Q66YT8) DWARF1/DIMINUTO, partial (98%)	SGN-U268686
MICRO.3427.C1	0.821846	0.791786	1.51813	0.732473	1.60798	1.15247	0.931716	Group IV	NP_194807	unknown protein [Arabidopsis thaliana]	TC141763	similar to UP|Q7GAD9_ARATH (Q7GAD9) Expressed protein, partial (29%)	SGN-U286374
MICRO.3424.C1	0.885509	1.47637	1.03004	1.20389	0.436873	0.610979	1.16386	Group V	ABE94140	tRNA-binding arm; KIP1-like [Medicago truncatula]	TC142893	weakly similar to UP|Q9FHK5_ARATH (Q9FHK5) Gb|AAF19561.1, partial (19%)	SGN-U276405
MICRO.3420.C1	0.56736	0.81897	0.968573	0.698283	0.562591	0.910277	0.958024	Group III	NP_178163	unknown protein [Arabidopsis thaliana]	TC142788	similar to GB|AAK56250.1|14194111|AF367261 At1g15730/F7H2_7 {Arabidopsis thaliana} (exp=-1; wgp=0; cg=0), partial (33%)	SGN-U274606
MICRO.3411.C1	0.778926	0.925667	0.979522	0.622835	0.597043	2.38999	1.02354	Group II	O82626	GTP-binding protein ERG	TC146299	similar to UP|ERG_ANTMA (O82626) GTP-binding protein ERG, partial (22%)	SGN-U280682
MICRO.341.C3	0.97208	1.18908	0.937027	0.809129	0.515834	0.655749	0.801539	Group V	Q40147	Glutamate-1-semialdehyde 2,1-aminomutase, chloroplast precursor (GSA) (Glutamate-1-semialdehyde aminotransferase) (GSA-AT)	TC148461	homologue to UP|GSA_LYCES (Q40147) Glutamate-1-semialdehyde 2,1-aminomutase, chloroplast precursor (GSA) (Glutamate-1-semialdehyde aminotransferase) (GSA-AT) , partial (56%)	SGN-U275087
MICRO.3403.C2	0.460645	0.90591	0.827863	0.736663	1.68962	1.7182	1.19664	Group I	AAS46242	xyloglucan endotransglucosylase-hydrolase XTH6 [Lycopersicon esculentum]	TC133540	homologue to UP|Q6RHX9_LYCES (Q6RHX9) Xyloglucan endotransglucosylase-hydrolase XTH6, complete	SGN-U269301
MICRO.34.C2	1.52589	0.833936	1.15854	1.11613	1.36616	2.31278	0.680646	Group I	P11796	Superoxide dismutase [Mn], mitochondrial precursor	TC155281		SGN-U270606
MICRO.339.C31	1.43305	1.18572	0.96153	0.60982	0.518922	3.04053	0.871754	Group II	BAB41076	MAR-binding protein [Nicotiana tabacum]	TC153737	homologue to UP|Q9AV96_TOBAC (Q9AV96) MAR-binding protein, partial (74%)	SGN-U268422
MICRO.339.C11	0.655036	1.49012	0.862824	0.783829	0.45289	3.04567	0.795899	Group II	BAB41076	MAR-binding protein [Nicotiana tabacum]	TC154495	homologue to UP|Q9AV96_TOBAC (Q9AV96) MAR-binding protein, partial (80%)	SGN-U286861
MICRO.3372.C2	1.26591	0.968261	1.02845	1.15522	1.99135	0.737615	1.538	Group IV	ABO78996	Protein kinase; Amino acid-binding ACT [Medicago truncatula]	TC145998	similar to RF|NP_568041.1|18420244|NM_120008 ATP binding {Arabidopsis thaliana} (exp=-1; wgp=0; cg=0), partial (77%)	SGN-U278117
MICRO.335.C2	1.11109	0.914056	1.32059	1.60509	1.14657	2.11007	1.01998	Group VI	NP_851234	ATPDIL1-4; electron transporter/ isomerase/ thiol-disulfide exchange intermediate [Arabidopsis thaliana]	TC151435	similar to UP|Q9FF55_ARATH (Q9FF55) Protein disulphide isomerase-like protein (Protein disulfide isomerase-like) (At5g60640), partial (79%)	SGN-U272624
MICRO.3330.C1	0.981761	0.92533	1.42569	0.627473	0.6417	1.35634	1.17299	Group II	AAX20035	ethylene responsive element binding protein C2 [Capsicum annuum]	TC159237	similar to UP|Q32W74_CAPAN (Q32W74) Ethylene responsive element binding protein C2, partial (69%)	SGN-U278608
MICRO.3312.C2	1.13261	1.13651	0.903187	1.95492	2.96361	1.59634	1.07242	Group I	AAX20039	tyrosine specific protein phosphatase family protein [Capsicum annuum]	TC159238	similar to UP|Q4E860_9RICK (Q4E860) Uncharacterized ACR, YhhQ family COG1738 family (Fragment), partial (9%)	SGN-U273303
MICRO.3312.C1	0.817424	1.15383	0.965046	1.74742	2.52515	1.7597	1.01048	Group VII	AAX20039	tyrosine specific protein phosphatase family protein [Capsicum annuum]	TC145449	homologue to UP|Q32W70_CAPAN (Q32W70) Tyrosine specific protein phosphatase family protein, partial (94%)	SGN-U273304
MICRO.331.C89	1.08559	0.922084	0.82473	0.967022	0.606163	0.285868	0.891478	Group V	P07369	Chlorophyll a-b binding protein 3C, chloroplast precursor (LHCII type I CAB-3C) (LHCP)	TC158044	UP|CB2G_LYCES (P07369) Chlorophyll a-b binding protein 3C, chloroplast precursor (LHCII type I CAB-3C) (LHCP), complete	SGN-U281248
MICRO.331.C88	1.86707	0.950461	1.12065	0.893732	1.73871	2.00435	0.368913	Group I	AAC95130	metallocarboxypeptidase inhibitor IIa precursor [Solanum tuberosum]	TC156315	similar to UP|Q9SBH8_SOLTU (Q9SBH8) Metallocarboxypeptidase inhibitor IIa, partial (50%)	SGN-U298575
MICRO.331.C112	1.87611	0.829401	1.01785	1.44491	1.4926	1.71	0.771301	Group I	NA	NA	TC153209		SGN-U281260
MICRO.331.C105	1.97438	1.30601	1.05267	1.05358	1.5261	0.999082	0.609051	Group I	AAC95130	metallocarboxypeptidase inhibitor IIa precursor [Solanum tuberosum]	TC158134	homologue to UP|Q9SBH8_SOLTU (Q9SBH8) Metallocarboxypeptidase inhibitor IIa, partial (75%)	SGN-U281296
MICRO.3305.C1	0.965901	0.590118	1.15245	1.05467	1.62057	2.10913	0.793644	Group I	AAV36808	arginase 1 [Lycopersicon esculentum]	TC158171	UP|Q5UNS2_LYCES (Q5UNS2) Arginase 1, complete	SGN-U270638
MICRO.3290.C1	0.856075	0.770281	1.00257	1.6473	2.19923	0.945996	0.850483	Group VII	NA	NA	TC133795	weakly similar to UP|KR211_HUMAN (Q3LI58) Keratin-associated protein 21-1, partial (34%)	SGN-U268771
MICRO.3282.C1	0.651361	0.820345	1.03883	0.652365	0.68128	1.0058	1.21984	Group III	BAA78552	thylakoid-bound ascorbate peroxidase [Nicotiana tabacum]	TC137794	similar to UP|Q3SC88_LYCES (Q3SC88) Thylakoid-bound ascorbate peroxidase 6 (Fragment) , partial (60%)	SGN-U270303
MICRO.3265.C1	1.27996	1.17706	0.991285	0.628932	0.601368	1.25155	1.11635	Group II	1909359A	ribosomal protein S19	TC137531	PRF|1909359A|445612|1909359A ribosomal protein S19. {Solanum tuberosum} (exp=-1; wgp=-1; cg=-1), complete	SGN-U270422
MICRO.3256.C1	0.501344	1.58386	1.10712	1.43402	0.899014	0.679215	0.471049	Group V	NP_177758	CYCB2;4; cyclin-dependent protein kinase regulator [Arabidopsis thaliana]	TC144342	similar to UP|Q9SGQ4_ARATH (Q9SGQ4) T23E18.24, partial (6%)	SGN-U276072
MICRO.3240.C1	0.876901	1.34278	0.883868	0.595727	0.556488	4.05014	0.743108	Group II	NP_191274	NAP57 [Arabidopsis thaliana]	CK264058		SGN-U269169
MICRO.3239.C2	0.489476	1.4598	0.915672	0.923823	0.423497	1.38408	0.808314	Group II	CAA05207	DNA (cytosine-5)-methyltransferase [Solanum lycopersicum]	DR034792		SGN-U274833
MICRO.3221.C1	0.663646	1.12186	1.13354	1.77566	2.68458	0.97152	1.02742	Group VII	Q6DW73	Digalactosyldiacylglycerol synthase 2, chloroplast	TC140896	similar to UP|Q6DW73_LOTJA (Q6DW73) Digalactosyldiacylglycerol synthase 2, partial (44%)	SGN-U281757
MICRO.3201.C1	0.432056	0.560326	1.07539	0.788963	1.04953	0.794537	1.2114	Group IV	CAB10321	UFD1 like protein [Arabidopsis thaliana]	TC140382	similar to UP|Q9FUB2_ARATH (Q9FUB2) PRLI-interacting factor K (Fragment), partial (33%)	SGN-U275718
MICRO.3194.C1	0.441132	0.601204	0.944288	0.749396	0.740122	1.49369	0.822087	Group III	NP_564247	unknown protein [Arabidopsis thaliana]	TC147555	weakly similar to UP|Q7XAM2_ORYSA (Q7XAM2) Pentatricopeptide (PPR) repeat-containing protein-like protein, partial (9%)	SGN-U282808
MICRO.3180.C2	1.56704	0.94551	4.16074	3.91416	1.18008	2.22275	1.11048	Group VI	EAY76147	hypothetical protein OsI_003994 [Oryza sativa (indica cultivar-group)]	TC158148		SGN-U275459
MICRO.3180.C1	0.828583	1.09751	2.3684	1.57412	1.1044	1.54409	0.807123	Group VI	NP_001044525	Os01g0798800 [Oryza sativa (japonica cultivar-group)]	TC161878	similar to UP|Q2R0M9_ORYSA (Q2R0M9) Expressed protein, partial (7%)	SGN-U285270
MICRO.3173.C2	0.657029	1.32017	1.04678	1.01365	1.03247	0.654626	0.513147	Group V	NA	NA	TC147635	weakly similar to UP|Q8H9E9_9FABA (Q8H9E9) Resistant specific protein-2, partial (8%)	SGN-U269974
MICRO.3173.C1	0.831814	1.73025	0.981626	0.839044	0.781599	0.651161	0.603073	Group V	ABO79008	BURP [Medicago truncatula]	TC147635	weakly similar to UP|Q8H9E9_9FABA (Q8H9E9) Resistant specific protein-2, partial (8%)	SGN-U269974
MICRO.3161.C2	1.25207	1.21785	0.802667	0.936128	1.09542	0.57972	0.604687	Group V	ABD39696	littorine mutase/monooxygenase [Hyoscyamus niger]	TC135361	weakly similar to UP|Q2QWF7_ORYSA (Q2QWF7) Cytochrome P450, partial (11%)	SGN-U272362
MICRO.3150.C2	1.29186	1.34751	1.60455	0.432245	1.47826	2.4835	0.58354	Group I	CAA67889	asparagine synthetase [Asparagus officinalis]	TC134111	similar to GB|AAD05035.1|2429284|AF014057 asparagine synthetase {Triphysaria versicolor} (exp=-1; wgp=0; cg=0), partial (96%)	SGN-U273394
MICRO.3138.C1	1.3059	0.80687	1.71874	3.29031	1.15186	0.820211	0.881615	Group VII	AAT09980	cell wall apoplastic invertase [Vitis vinifera]	TC160446	weakly similar to UP|Q84XV1_MUSAC (Q84XV1) Cell wall invertase, partial (13%)	SGN-U284799
MICRO.3133.C1	0.408174	0.609516	1.08495	1.1007	1.29336	1.78251	1.27185	Group I	NP_172468	ATP binding / protein serine/threonine kinase [Arabidopsis thaliana]	TC160868	weakly similar to UP|Q9LJM4_ARATH (Q9LJM4) Receptor-like protein kinase, partial (15%)	SGN-U293207
MICRO.3108.C2	0.858695	1.18054	0.974058	1.42596	0.490856	0.613214	0.824121	Group V	NA	NA	TC157126		SGN-U289297
MICRO.3098.C2	1.25394	0.705846	0.82455	0.45564	1.37879	0.399246	0.553894	Group IV	AAQ83692	C-4 sterol methyl oxidase 2 [Nicotiana benthamiana]	TC141115	similar to UP|Q5J954_NICBE (Q5J954) C-4 sterol methyl oxidase 2 (Fragment), complete	SGN-U284672
MICRO.3063.C1	1.01101	0.58814	1.7908	0.891263	0.848913	2.16993	0.590586	Group VI	ABC59081	cytochrome P450 monooxygenase CYP92A29 [Medicago truncatula]	TC162077	weakly similar to UP|Q8W228_PYRCO (Q8W228) Cytochrome P450, partial (35%)	SGN-U281896
MICRO.302.C1	0.663717	1.20153	1.02713	0.937419	0.534149	0.775436	0.932362	Group V	AAA33873	beta-ketoacyl-ACP synthase	TC138571	similar to UP|KASC1_ARATH (P52410) 3-oxoacyl-[acyl-carrier-protein] synthase I, chloroplast precursor (Beta-ketoacyl-ACP synthase I) (KAS I) , partial (97%)	SGN-U270190
MICRO.3011.C1	0.320193	1.00067	0.956154	1.05916	0.609818	1.74322	1.18136	Group III	NP_190782	unknown protein [Arabidopsis thaliana]	TC144785	similar to UP|Q6ZGV8_ORYSA (Q6ZGV8) Eukaryotic translation initiation factor 3 subunit (EIF-3)-like, partial (15%)	SGN-U276096
MICRO.2990.C1	0.654475	1.81082	1.1151	1.06399	0.687641	0.570753	0.556448	Group V	BAD14382	hypothetical protein [Solanum melongena]	TC148884	weakly similar to UP|Q652I7_ORYSA (Q652I7) SEC14 cytosolic factor-like, partial (45%)	SGN-U277488
MICRO.2981.C1	0.646617	0.989207	0.987587	1.26876	0.972901	0.659757	1.06534	Group III	NP_173922	aspartic-type endopeptidase/ pepsin A [Arabidopsis thaliana]	TC152768	similar to RF|NP_173922.1|15222611|NM_102362 aspartic-type endopeptidase/ pepsin A {Arabidopsis thaliana} (exp=-1; wgp=0; cg=0), partial (72%)	SGN-U278124
MICRO.2979.C1	0.646518	1.20458	0.876238	1.00459	0.546246	0.837035	1.01274	Group V	NP_176001	GTP binding [Arabidopsis thaliana]	TC134934	similar to RF|NP_176001.2|42562778|NM_104483 GTP binding {Arabidopsis thaliana} (exp=-1; wgp=0; cg=0), partial (49%)	SGN-U277372
MICRO.2963.C1	1.73472	0.816592	1.03403	1.19224	1.58931	0.722719	1.26422	Group I	CAA64417	homeobox [Solanum lycopersicum]	TC152356	homologue to UP|Q43529_LYCES (Q43529) Homeobox, partial (90%)	SGN-U269575
MICRO.2954.C1	0.469519	0.753136	1.02713	0.921766	0.993923	0.616114	1.13075	Group III	NP_001043642	Os01g0629900 [Oryza sativa (japonica cultivar-group)]	TC157450	homologue to UP|Q5ZCI3_ORYSA (Q5ZCI3) Mitogen-activated protein kinase 7-like, partial (43%)	SGN-U279090
MICRO.295.C2	1.6131	1.01791	0.769549	0.592839	0.913796	0.492649	0.420884	Group V	NP_175688	oxidoreductase, acting on paired donors, with incorporation or reduction of molecular oxygen, 2-oxoglutarate as one donor, and incorporation of one atom each of oxygen into both donors [Arabidopsis thaliana]	TC152596		SGN-U269619
MICRO.2932.C1	0.935432	0.625633	1.1231	0.916135	0.70274	1.69929	2.07522	Group III	AAO92257	gamma-aminobutyrate transaminase subunit precursor isozyme 3 [Lycopersicon esculentum]	TC136893	homologue to UP|Q84P52_LYCES (Q84P52) Gamma-aminobutyrate transaminase subunit isozyme 3 , partial (59%)	SGN-U277939
MICRO.291.C1	0.886134	1.11591	1.00723	0.58853	0.565059	3.04447	0.856124	Group II	Q05046	Chaperonin CPN60-2, mitochondrial precursor (HSP60-2)	TC139946	homologue to UP|CH62_CUCMA (Q05046) Chaperonin CPN60-2, mitochondrial precursor (HSP60-2), partial (62%)	SGN-U269275
MICRO.2896.C1	0.470703	0.431977	1.08495	1.21463	0.774411	1.09504	1.23327	Group III	BAE53680	putative glycerophosphoryl diester phosphodiesterase family protein [Nicotiana tabacum]	TC146045	weakly similar to UP|GLPQ1_ARATH (Q9FJ62) Probable glycerophosphoryl diester phosphodiesterase 1 precursor , partial (20%)	SGN-U275310
MICRO.2890.C1	0.400392	0.654151	1.38145	1.54829	0.9857	0.837847	1.34447	Group III	NP_850772	unknown protein [Arabidopsis thaliana]	TC149892	similar to UP|Q9FLC3_ARATH (Q9FLC3) Arabidopsis thaliana genomic DNA, chromosome 5, TAC clone:K18I23, partial (23%)	SGN-U286355
MICRO.2888.C1	0.470739	0.897757	1.72053	1.54112	0.628212	1.49177	1.43225	Group III	NP_563881	transporter [Arabidopsis thaliana]	TC140097	similar to GB|AAL48237.1|17933310|AF446365 At1g10950/T19D16_13 {Arabidopsis thaliana} (exp=-1; wgp=0; cg=0), partial (18%)	SGN-U276221
MICRO.2883.C2	0.512256	0.746902	1.59104	0.807478	0.691031	0.828014	0.587639	Group V	AAS97959	peroxidase precursor [Euphorbia characias]	TC133894	similar to UP|Q6PQF2_EUPCH (Q6PQF2) Peroxidase precursor , partial (83%)	SGN-U270433
MICRO.2883.C1	0.520898	0.688083	1.67638	0.938067	0.677307	0.897608	0.592611	Group V	BAD07011	peroxidase [Coffea arabica]	TC156611	similar to UP|Q6PQF2_EUPCH (Q6PQF2) Peroxidase precursor , partial (78%)	SGN-U270433
MICRO.2876.C2	1.89342	0.843966	9.57472	3.17033	0.644001	0.950454	1.59037	Group VI	AAF61864	DNA-binding protein 4 [Nicotiana tabacum]	TC137180	similar to UP|Q9M6E0_TOBAC (Q9M6E0) DNA-binding protein 4 (Fragment), partial (51%)	SGN-U270284
MICRO.2876.C1	1.86085	0.898732	8.2155	3.32397	0.652202	0.930293	1.53775	Group VI	AAF61864	DNA-binding protein 4 [Nicotiana tabacum]	TC161632	similar to UP|Q9M6E0_TOBAC (Q9M6E0) DNA-binding protein 4 (Fragment), partial (40%)	SGN-U270283
MICRO.2868.C3	1.54959	0.589344	1.47592	0.439062	1.09953	4.58236	2.01526	Group I	AAT72296	microsomal omega-6-desaturase [Nicotiana tabacum]	TC155656	similar to UP|Q43500_LYCES (Q43500) Lipid desaturase-like protein, partial (95%)	SGN-U272244
MICRO.2868.C1	1.36756	0.720725	0.969276	1.09645	0.644078	5.38218	0.5513	Group I	AAT72296	microsomal omega-6-desaturase [Nicotiana tabacum]	TC150019	similar to UP|Q43500_LYCES (Q43500) Lipid desaturase-like protein, partial (96%)	SGN-U272243
MICRO.2862.C2	0.663671	1.01277	0.949131	0.712679	0.554746	1.64969	1.00799	Group II	ABB87120	ribosomal protein L3-like [Solanum tuberosum]	TC134273	UP|Q2VCJ2_SOLTU (Q2VCJ2) Ribosomal protein L3-like, complete	SGN-U268285
MICRO.2860.C1	0.50832	0.565544	0.974025	0.652926	1.03011	1.0669	1.13058	Group III	BAE06227	heat shock protein [Solanum lycopersicum]	TC159653	homologue to UP|Q4LDR0_LYCES (Q4LDR0) Heat shock protein, partial (25%)	SGN-U275957
MICRO.2825.C1	0.736797	1.24134	0.984426	0.918717	0.165694	0.372112	1.21757	Group V	AAA33907	histone 3	TC149263	UP|Q76MV0_TOBAC (Q76MV0) H3 histone, complete	SGN-U274083
MICRO.2811.C1	0.592733	0.601848	1.00087	0.821733	1.05182	1.36013	0.925634	Group III	NP_850312	amino acid permease [Arabidopsis thaliana]	TC136687	similar to RF|NP_850312.1|30687791|NM_179981 amino acid permease {Arabidopsis thaliana} (exp=-1; wgp=0; cg=0), partial (57%)	SGN-U275293
MICRO.2759.C1	1.06854	0.651736	1.73489	1.57915	1.22315	1.14014	1.14403	Group VI	BAC07504	receptor-like protein kinase [Nicotiana tabacum]	TC156574	similar to UP|Q8LP72_TOBAC (Q8LP72) Receptor-like protein kinase, partial (57%)	SGN-U282602
MICRO.2758.C1	0.873265	0.523733	1.0603	1.02575	1.23133	0.529973	1.2317	Group IV	AAZ43369	AlaT1 [Vitis vinifera]	TC134005	similar to UP|Q45RS3_VITVI (Q45RS3) AlaT1, partial (97%)	SGN-U270121
MICRO.2751.C2	1.32007	1.21041	0.801927	1.01056	1.83059	2.5773	1.00588	Group I	AAP44394	nematode resistance-like protein [Solanum tuberosum]	TC135724	weakly similar to UP|Q710T8_POPDE (Q710T8) TIR/NBS/LRR protein, partial (6%)	SGN-U273349
MICRO.2740.C1	0.578438	0.863694	0.900791	0.864646	0.990903	0.426389	0.96378	Group III	ABJ90469	beta-ketoacyl-ACP synthase II [Jatropha curcas]	TC148663	similar to UP|O48943_PERFR (O48943) Beta-ketoacyl-ACP synthase II, partial (45%)	SGN-U275561
MICRO.2739.C1	1.19571	0.74871	1.01342	0.818536	1.61148	1.72484	0.744262	Group I	NP_176647	catalytic [Arabidopsis thaliana]	TC133183	similar to RF|NP_176647.1|15217709|NM_105141 catalytic {Arabidopsis thaliana} (exp=-1; wgp=0; cg=0), partial (90%)	SGN-U278250
MICRO.2717.C1	0.352028	0.586992	1.05225	0.970317	0.895133	0.902216	1.02017	Group III	NP_196645	transporter [Arabidopsis thaliana]	TC155823	similar to RF|NP_179994.2|30682320|NM_127978 transporter {Arabidopsis thaliana} (exp=-1; wgp=0; cg=0), partial (20%)	SGN-U294761
MICRO.27.C1	1.36952	0.612425	1.12309	0.790784	0.923335	5.41964	0.618221	Group I	AAG49896	PnFL-2 [Ipomoea nil]	TC145926	similar to UP|Q9AXP7_IPONI (Q9AXP7) PnFL-2, partial (18%)	SGN-U271565
MICRO.2688.C4	1.64331	0.890504	1.2851	0.90037	1.98133	1.75081	0.736612	Group I	AAP42136	erg-1 [Solanum tuberosum]	TC134089	UP|Q7Y0S8_SOLTU (Q7Y0S8) Erg-1, complete	SGN-U268491
MICRO.2681.C1	1.49079	0.85404	0.962988	0.557635	0.989264	0.865166	0.417257	Group I	AAB48444	UDP-galactose:solanidine galactosyltransferase [Solanum tuberosum]	TC134883	UP|P93789_SOLTU (P93789) UDP-galactose:solanidine galactosyltransferase, complete	SGN-U270466
MICRO.2675.C1	0.44549	0.663179	0.839784	1.12772	1.00622	0.757131	1.00276	Group III	BAF42037	cellulase2 [Pyrus communis]	TC152792	similar to UP|Q9FXI9_ARATH (Q9FXI9) F6F9.1 protein (At1g19940/F6F9_1), partial (87%)	SGN-U272426
MICRO.2673.C1	0.530896	0.754157	0.972328	1.16257	0.986695	0.521462	1.1582	Group III	CAA07638	w-3 desaturase [Solanum tuberosum]	TC143233	UP|O82068_SOLTU (O82068) W-3 desaturase, complete	SGN-U269726
MICRO.2668.C1	0.464409	0.82284	0.900673	1.00861	1.38264	0.546249	1.08006	Group III	NP_192203	unknown protein [Arabidopsis thaliana]	TC146150		SGN-U281117
MICRO.2630.C1	0.616209	0.815933	0.957115	1.05531	1.18853	0.46602	1.05202	Group III	NP_198034	unknown protein [Arabidopsis thaliana]	TC161269	similar to UP|O04629_ARATH (O04629) F2P16.6 protein, partial (34%)	SGN-U274610
MICRO.263.C1	0.489785	0.638988	0.984452	1.28526	1.00688	0.784218	1.15125	Group III	NP_566791	unknown protein [Arabidopsis thaliana]	TC152271	homologue to GB|AAA80520.1|1041056|HRSTCRAZ This CDS feature is included to show the translation of the corresponding V_region. Presently translation qualifiers on V_region features are illegal. {Equus caballus} (exp=-1; wgp=0; cg=0), partial (11%)	SGN-U276035
MICRO.2616.C1	1.25658	0.970331	1.44295	1.51108	0.996816	1.5569	1.18626	Group VI	AAV92905	Avr9/Cf-9 rapidly elicited protein 256 [Nicotiana tabacum]	TC156373	similar to UP|Q5MJV5_TOBAC (Q5MJV5) Avr9/Cf-9 rapidly elicited protein 256 (Fragment), partial (44%)	SGN-U281604
MICRO.2608.C2	1.16117	0.897384	1.13582	1.38207	2.10083	1.75714	0.410054	Group I	EAY96842	hypothetical protein OsI_018075 [Oryza sativa (indica cultivar-group)]	TC137692	similar to UP|O49855_SOYBN (O49855) Acid phosphatase, partial (25%)	SGN-U281335
MICRO.2600.C6	1.29585	0.820595	1.55742	0.512025	1.86752	0.3234	0.885229	Group IV	ABN03968	DNAJ-like protein [Solanum lycopersicum]	TC154107	similar to UP|P93499_PHAVU (P93499) DnaJ-like protein (Fragment), partial (25%)	SGN-U273758
MICRO.2583.C1	0.376707	0.892379	0.956462	1.07149	0.467235	1.10262	1.5251	Group III	ABE90103	MCM; Nucleic acid-binding, OB-fold [Medicago truncatula]	TC143853	similar to UP|Q8H1A2_PEA (Q8H1A2) Mini-chromosome maintenance protein MCM3, partial (45%)	SGN-U278071
MICRO.2576.C1	0.440712	1.07714	1.10473	0.684872	0.655018	2.1542	0.905185	Group II	ABE88833	Helicase, C-terminal [Medicago truncatula]	TC148486	similar to UP|Q93Y39_ARATH (Q93Y39) ATP-dependent RNA helicase (Fragment), partial (22%)	SGN-U275025
MICRO.2574.C2	1.12372	0.808318	1.57343	1.52791	1.10433	1.04911	0.901747	Group VII	ABN08998	Protein kinase [Medicago truncatula]	TC153718	weakly similar to UP|Q53JL7_ORYSA (Q53JL7) Receptor-like protein kinase, partial (77%)	SGN-U274106
MICRO.2511.C2	0.910236	0.652533	0.95467	0.779771	1.17769	0.501473	1.31816	Group IV	NP_001058196	Os06g0646000 [Oryza sativa (japonica cultivar-group)]	TC161371	similar to UP|Q67W64_ORYSA (Q67W64) Methyltransferase-like, partial (28%)	SGN-U273877
MICRO.2510.C4	0.784285	1.20817	0.871142	0.659554	0.653136	1.87191	0.929512	Group II	NP_174368	CTP synthase/ catalytic [Arabidopsis thaliana]	TC148402	similar to RF|NP_174368.1|15221525|NM_102819 CTP synthase/ catalytic {Arabidopsis thaliana} (exp=-1; wgp=0; cg=0), partial (92%)	SGN-U268947
MICRO.2510.C1	0.335067	1.069	0.944101	0.997105	0.647607	0.903716	1.13423	Group III	ABN08198	Glutamine amidotransferase, class I, active site [Medicago truncatula]	TC146728	homologue to GB|AAP37719.1|30725394|BT008360 At3g12670 {Arabidopsis thaliana} (exp=-1; wgp=0; cg=0), partial (32%)	SGN-U268948
MICRO.2503.C3	1.56026	0.929745	0.898424	1.06105	1.42255	2.19416	1.97927	Group I	Q9LW96	Inositol-3-phosphate synthase (Myo-inositol-1-phosphate synthase) (MI-1-P synthase) (IPS)	TC137386	homologue to UP|INO1_TOBAC (Q9LW96) Inositol-3-phosphate synthase (Myo-inositol-1-phosphate synthase) (MI-1-P synthase) (IPS) , complete	SGN-U269103
MICRO.25.C4	0.504765	0.903519	0.959986	1.22446	1.33178	0.644622	1.15282	Group III	BAA77603	plastidic aldolase [Nicotiana paniculata]	TC132956	homologue to UP|Q9SXX5_NICPA (Q9SXX5) Plastidic aldolase, complete	SGN-U268532
MICRO.2498.C1	0.472584	0.84487	1.02961	0.923193	1.15365	0.544038	1.03633	Group III	CAA67130	acetyl-CoA synthetase [Solanum tuberosum]	TC137744	UP|Q9ZR69_SOLTU (Q9ZR69) Acetyl-CoA synthetase , complete	SGN-U272340
MICRO.248.C1	0.84463	1.39376	1.17443	1.13661	0.591872	0.532937	0.581559	Group V	CAD13177	alpha-tubulin [Nicotiana tabacum]	TC145919	homologue to UP|Q8VXD1_TOBAC (Q8VXD1) Alpha-tubulin, complete	SGN-U277025
MICRO.2468.C7	1.02064	1.2498	1.01774	0.841373	0.476581	0.57816	1.0984	Group V	P35057	Histone H4	TC162308	GB|AAB94924.1|2746721|AF038387 histone H4 {Capsicum annuum} (exp=-1; wgp=0; cg=0), complete	SGN-U268358
MICRO.246.C1	0.710489	0.97955	0.972128	0.612389	0.479303	4.05775	0.779104	Group II	NP_196218	unknown protein [Arabidopsis thaliana]	TC160005	weakly similar to GB|AAK96448.1|15450541|AY052734 AT5g05990/K18J17_19 {Arabidopsis thaliana} (exp=-1; wgp=0; cg=0), partial (34%)	SGN-U272127
MICRO.2456.C3	1.09452	1.40629	0.946504	0.563538	0.454341	3.47016	0.927548	Group II	NA	NA	TC157437	similar to UP|SAHH_MYCBO (Q7TWW7) Adenosylhomocysteinase (S-adenosyl-L-homocysteine hydrolase) (AdoHcyase) , partial (4%)	SGN-U279511
MICRO.2452.C2	0.669613	1.14418	1.12469	0.651665	0.570269	4.48551	0.790093	Group II	ABA40453	RNA binding protein-like protein [Solanum tuberosum]	TC145269	similar to UP|O23793_NICSY (O23793) RNA binding protein, complete	SGN-U272857
MICRO.2447.C1	0.414025	0.641274	0.991087	0.915522	0.951326	0.61006	0.961955	Group III	AAU21295	EDS5-like protein [Solanum tuberosum]	TC150681	homologue to UP|Q32ZJ2_SOLTU (Q32ZJ2) EDS5-like protein (Fragment), complete	SGN-U283351
MICRO.2415.C1	0.764873	0.6516	1.01353	1.30586	2.72947	0.479251	1.154	Group VII	NP_568085	SQD2 (SULFOQUINOVOSYLDIACYLGLYCEROL 2); UDP-sulfoquinovose:DAG sulfoquinovosyltransferase/ transferase, transferring glycosyl groups [Arabidopsis thaliana]	TC150887		SGN-U273989
MICRO.2406.C1	0.658237	1.50358	0.992927	1.36017	0.65781	0.136794	0.673515	Group V	NP_181812	PDF1 (PROTODERMAL FACTOR 1) [Arabidopsis thaliana]	TC148483	similar to UP|Q9S728_ARATH (Q9S728) En/Spm-like transposon protein (At2g42840) (Protodermal factor 1), partial (33%)	SGN-U270677
MICRO.24.C6	1.04675	0.968115	0.859732	0.787144	0.576998	0.349269	0.862984	Group V	CAA06000	extensin-like protein [Solanum tuberosum]	TC136576	similar to UP|O49946_SOLTU (O49946) Extensin-like protein (Fragment), partial (32%)	SGN-U276016
MICRO.2391.C3	0.940683	0.896663	1.95839	1.96975	1.24362	1.89559	1.00455	Group VI	CAC01812	putative protein (fragment) [Arabidopsis thaliana]	TC136518	similar to UP|Q9LL48_ARATH (Q9LL48) SAG101, partial (16%)	SGN-U276717
MICRO.2349.C3	1.11728	1.16874	0.970213	0.652121	0.637114	2.031	0.875094	Group II	AAA84891	non-green plastid inner envelope membrane protein precursor	TC135365	weakly similar to UP|Q39364_BRAOL (Q39364) Non-green plastid inner envelope membrane protein precursor, partial (26%)	SGN-U272537
MICRO.2346.C12	1.19573	0.680598	1.84869	1.36046	1.53318	1.82278	0.82557	Group VI	ABE81473	Plant lipid transfer protein/Par allergen [Medicago truncatula]	TC148280	homologue to UP|TUB8_SOLTU (P33191) Induced stolen tip protein TUB8 (Fragment), partial (98%)	SGN-U268506
MICRO.2345.C1	0.626786	0.51739	1.09742	0.99851	1.10992	0.7061	1.32306	Group IV	NP_001043877	Os01g0681000 [Oryza sativa (japonica cultivar-group)]	TC153577		SGN-U277783
MICRO.2329.C1	0.940975	1.11	0.893991	0.649646	0.52182	2.18227	1.14974	Group II	ABA46764	unknown [Solanum tuberosum]	TC138329	homologue to UP|Q6TKT4_SOLBR (Q6TKT4) 60S ribosomal protein L13 (Fragment), complete	SGN-U268693
MICRO.2327.C1	0.558583	0.96758	0.908373	0.89209	0.911479	0.384742	1.18345	Group III	EAZ10130	hypothetical protein OsI_031362 [Oryza sativa (indica cultivar-group)]	TC132958	similar to UP|Q9ZUX0_ARATH (Q9ZUX0) Expressed protein (At2g27680/F15K20.22), partial (87%)	SGN-U275217
MICRO.2321.C2	0.993181	0.907899	1.5236	1.65691	1.34797	0.636789	1.01575	Group VII	AAT37498	GDP-mannose pyrophosphorylase [Lycopersicon esculentum]	TC135638	homologue to UP|Q6J1L7_LYCES (Q6J1L7) GDP-mannose pyrophosphorylase , partial (86%)	SGN-U270619
MICRO.2320.C2	0.653728	0.60866	0.922689	1.08568	1.3301	0.740144	1.09942	Group IV	NP_186796	ATHB-1; transcription factor [Arabidopsis thaliana]	TC133267	similar to UP|HAT5_ARATH (Q02283) Homeobox-leucine zipper protein HAT5 (HD-ZIP protein 5) (HD-ZIP protein ATHB-1), partial (49%)	SGN-U273147
MICRO.2312.C1	0.450351	0.641146	0.991375	0.817546	1.01213	0.654478	1.06215	Group III	NP_569013	metalloendopeptidase [Arabidopsis thaliana]	TC148118	similar to RF|NP_569013.1|18424970|NM_125960 metalloendopeptidase {Arabidopsis thaliana} (exp=-1; wgp=0; cg=0), partial (40%)	SGN-U279769
MICRO.2286.C92	2.53591	0.948949	4.92305	3.20008	0.551411	0.594933	1.85254	Group VI	NA	NA	TC153474	similar to UP|Q9YH81_CHICK (Q9YH81) Neurogenin 1 (Atonal-like protein 4c), partial (10%)	SGN-U296262
MICRO.2286.C46	1.00005	1.71739	0.736113	0.863909	0.701276	1.9523	0.996302	Group II	NA	NA	TC159239	similar to UP|Q54HP1_DICDI (Q54HP1) Myb domain-containing protein, partial (3%)	SGN-U268819
MICRO.2286.C45	1.01338	1.89609	0.746331	0.993657	0.82395	2.17885	0.89163	Group II	NA	NA	TC134341	similar to UP|Q56PC0_FELCA (Q56PC0) RPGR (Fragment), partial (5%)	SGN-U287050
MICRO.2286.C20	1.20856	1.5741	0.771702	0.895149	0.972139	1.85204	0.803998	Group I	NA	NA	TC143364		SGN-U284519
MICRO.2286.C17	1.63324	0.683222	1.55592	1.84275	2.76363	2.67268	0.9987	Group I	CAE53273	1,3-beta-glucan glucanohydrolase [Solanum tuberosum]	TC154673	similar to UP|Q70BW9_SOLTU (Q70BW9) 1,3-beta-glucan glucanohydrolase , partial (70%)	SGN-U269733
MICRO.2283.C1	0.405525	0.62295	0.950602	1.1696	0.848337	0.984418	1.14616	Group III	NP_176636	ATGCN3 [Arabidopsis thaliana]	TC138752	similar to RF|NP_176636.1|15217680|NM_105130 ATGCN3 {Arabidopsis thaliana} (exp=-1; wgp=0; cg=0), partial (55%)	SGN-U273897
MICRO.2276.C1	0.675748	0.968538	1.09226	0.881288	0.418656	0.516265	0.848693	Group III	ABE84483	hypothetical protein MtrDRAFT_AC122726g25v2 [Medicago truncatula]	TC149525	similar to UP|Q9FJJ1_ARATH (Q9FJJ1) Arabidopsis thaliana genomic DNA, chromosome 5, TAC clone:K19B1, partial (11%)	SGN-U277453
MICRO.2274.C2	0.54681	1.21487	1.0551	0.637798	0.507215	3.34877	1.16289	Group II	AAM60996	unknown [Arabidopsis thaliana]	TC141632	weakly similar to UP|Q4FMQ6_PELUB (Q4FMQ6) Predicted permease YjgP/YjgQ family protein, partial (6%)	SGN-U271471
MICRO.2267.C1	0.420453	1.20911	1.11019	1.1079	0.581959	1.02605	1.07878	Group III	NP_565940	unknown protein [Arabidopsis thaliana]	TC139114	similar to UP|Q56W89_ARATH (Q56W89) Rhodanese like protein, partial (46%)	SGN-U275811
MICRO.2261.C2	1.19462	1.47897	1.08524	1.22813	0.652755	0.675864	0.609776	Group V	NP_195009	kinase/ protein serine/threonine kinase [Arabidopsis thaliana]	TC141053	homologue to RF|NP_195009.1|15233958|NM_119436 kinase/ protein serine/threonine kinase {Arabidopsis thaliana} (exp=-1; wgp=0; cg=0), partial (71%)	SGN-U277473
MICRO.2261.C1	0.986389	1.21282	1.2085	1.23879	0.732535	0.405472	0.606717	Group V	ABE80792	Protein kinase [Medicago truncatula]	TC139338	homologue to RF|NP_195009.1|15233958|NM_119436 kinase/ protein serine/threonine kinase {Arabidopsis thaliana} (exp=-1; wgp=0; cg=0), partial (94%)	SGN-U277473
MICRO.2255.C1	0.338931	0.694071	0.923869	0.939806	0.875794	0.618598	0.962678	Group III	BAC98298	LEXYL1 [Solanum lycopersicum]	TC145815	homologue to UP|Q76MS4_LYCES (Q76MS4) LEXYL2 protein (Fragment), partial (88%)	SGN-U272452
MICRO.2240.C2	0.816554	1.29399	0.88959	0.655876	0.274297	1.68153	0.821273	Group II	AAS92464	Fe-superoxide dismutase 1 precursor [Lotus corniculatus var. japonicus]	TC139593	similar to UP|Q8W596_MEDSA (Q8W596) Fe-superoxide dismutase , partial (76%)	SGN-U272322
MICRO.2240.C1	1.02219	1.42234	0.789955	0.665639	0.35835	1.47919	1.02806	Group II	AAS92464	Fe-superoxide dismutase 1 precursor [Lotus corniculatus var. japonicus]	TC159047	similar to UP|Q53D73_LOTJA (Q53D73) Fe-superoxide dismutase 1 , partial (36%)	SGN-U272322
MICRO.223.C1	0.862812	1.14334	0.93844	0.648107	0.698417	0.424735	1.14145	Group V	EAY88195	hypothetical protein OsI_009428 [Oryza sativa (indica cultivar-group)]	TC138715	UP|Q65C76_SETVI (Q65C76) Beta tubulin, partial (57%)	SGN-U269180
MICRO.2196.C1	0.494009	0.864479	1.03619	0.637923	0.634644	2.76672	0.90117	Group II	AAL09728	AT3g13860/MCP4_7 [Arabidopsis thaliana]	TC152726	similar to GB|AAL09728.1|15982717|AY056782 AT3g13860/MCP4_7 {Arabidopsis thaliana} (exp=-1; wgp=0; cg=0), partial (41%)	SGN-U275695
MICRO.2188.C2	0.943739	1.0346	1.52414	0.818567	1.52396	1.35956	0.885964	Group I	NP_565048	binding [Arabidopsis thaliana]	TC133116	similar to UP|Q9SSP4_ARATH (Q9SSP4) F3N23.2 protein (At1g72820/F3N23_2), partial (90%)	SGN-U295947
MICRO.2170.C5	0.644613	0.616964	1.15631	1.20854	1.42057	0.866414	1.00428	Group III	CAB53515	cysteine protease [Solanum tuberosum]	TC132864	UP|Q9ST61_SOLTU (Q9ST61) Cysteine protease, complete	SGN-U268427
MICRO.2167.C1	0.66246	0.843091	0.854915	1.05618	0.979958	0.457061	1.10574	Group III	NP_001065749	Os11g0148500 [Oryza sativa (japonica cultivar-group)]	TC135950	similar to UP|Q2QXR8_ORYSA (Q2QXR8) Pyruvate kinase, barrel domain, complete	SGN-U271035
MICRO.2136.C1	0.634996	1.22152	1.03257	0.618155	0.474126	2.82779	0.840531	Group II	NP_001050698	Os03g0625900 [Oryza sativa (japonica cultivar-group)]	TC139728	similar to UP|Q9M0V4_ARATH (Q9M0V4) U3 snoRNP-associated-like protein, partial (32%)	SGN-U270563
MICRO.2133.C1	0.451873	0.980345	1.10391	0.752869	0.611548	1.71958	1.05832	Group II	NP_565435	ATP binding / ATPase/ nucleoside-triphosphatase/ nucleotide binding [Arabidopsis thaliana]	TC144903	similar to RF|NP_565435.1|18398708|NM_127390 ATP binding {Arabidopsis thaliana} (exp=-1; wgp=0; cg=0), partial (22%)	SGN-U274594
MICRO.2129.C1	0.634727	1.05114	0.8916	0.686115	0.641732	1.08277	1.18476	Group III	NP_566439	unknown protein [Arabidopsis thaliana]	TC153655	similar to UP|Q9LDY9_ARATH (Q9LDY9) IojAP protein-like (Expressed protein), partial (32%)	SGN-U277293
MICRO.2125.C2	1.00154	0.525758	0.918599	0.776708	3.15488	4.32382	0.607767	Group I	P93224	Nonspecific lipid-transfer protein 2 precursor (LTP 2)	TC145196	homologue to UP|NLTP1_LYCES (P93224) Nonspecific lipid-transfer protein 1 precursor (LTP 1), complete	SGN-U268923
MICRO.212.C6	1.20999	1.01808	3.68923	2.27673	1.13587	0.733838	1.27376	Group VI	AAU89729	hypothetical protein [Solanum tuberosum]	TC134517	weakly similar to UP|Q2V3R7_ARATH (Q2V3R7) Protein At3g28540, partial (71%)	SGN-U273166
MICRO.212.C4	1.50729	1.0343	2.98975	2.71546	1.19622	0.893713	1.33784	Group VI	AAU89729	hypothetical protein [Solanum tuberosum]	TC138226	similar to RF|NP_189499.1|15233037|NM_113778 ATP binding {Arabidopsis thaliana} (exp=-1; wgp=0; cg=0), partial (30%)	SGN-U273166
MICRO.212.C1	1.03073	1.02975	3.36959	2.44982	1.35664	0.78954	1.21509	Group VI	AAU89729	hypothetical protein [Solanum tuberosum]	TC134517	weakly similar to UP|Q2V3R7_ARATH (Q2V3R7) Protein At3g28540, partial (71%)	SGN-U273166
MICRO.2114.C1	0.658498	1.09644	0.900331	0.668497	0.495454	3.146	0.87918	Group II	NP_568939	unknown protein [Arabidopsis thaliana]	TC149545	similar to UP|Q3E6R7_ARATH (Q3E6R7) Protein At5g61770, partial (83%)	SGN-U298108
MICRO.2103.C1	0.44717	0.265179	0.970108	0.752469	0.881633	1.18871	0.922625	Group III	EAY96027	hypothetical protein OsI_017260 [Oryza sativa (indica cultivar-group)]	TC156369	weakly similar to UP|Q9FFE6_ARATH (Q9FFE6) AMP-binding protein (Adenosine monophosphate binding protein 5 AMPBP5), partial (17%)	SGN-U278416
MICRO.2069.C2	0.560323	0.542431	1.23072	0.88194	1.19064	0.729407	0.9836	Group IV	BAE71216	putative NAD dependent epimerase [Trifolium pratense]	TC149061	similar to GB|BAB03000.1|9294651|AP001297 nucleotide sugar epimerase-like protein {Arabidopsis thaliana} (exp=0; wgp=1; cg=0) , partial (40%)	SGN-U273996
MICRO.2030.C1	0.561886	0.640662	1.16518	1.36384	1.24446	1.07277	1.01386	Group III	ABE87026	Peptidase aspartic, active site [Medicago truncatula]	TC151790	similar to UP|Q9FMH3_ARATH (Q9FMH3) Similarity to chloroplast nucleoid DNA-binding protein, partial (36%)	SGN-U294250
MICRO.2022.C6	1.53185	1.18393	0.833928	1.0506	1.14801	2.38378	0.854034	Group I	NA	NA	TC136941		SGN-U275365
MICRO.1994.C1	0.38956	0.554892	0.829971	0.965179	0.793007	1.9905	0.999433	Group III	NP_174230	unknown protein [Arabidopsis thaliana]	TC145787	similar to UP|Q5SN38_ORYSA (Q5SN38) TA9 protein-like, partial (7%)	SGN-U278750
MICRO.1978.C3	0.942736	0.919713	1.91233	2.41344	0.808987	0.92414	1.46968	Group VI	NP_188563	protein binding [Arabidopsis thaliana]	TC135359	similar to RF|XP_507566.1|51979639|XM_507566 OJ1163_G08.29 gene product {Oryza sativa (japonica cultivar-group)} (exp=-1; wgp=0; cg=0), partial (49%)	SGN-U271768
MICRO.1964.C1	0.926508	0.535744	1.68956	2.42267	1.08744	0.946078	0.853531	Group VI	CAC42086	putative peroxidase [Solanum tuberosum]	TC137230	similar to UP|Q84UA9_ARTAN (Q84UA9) Peroxidase 1, partial (93%)	SGN-U270731
MICRO.1962.C2	1.09876	1.53026	1.03704	0.834057	0.703996	1.90705	1.00517	Group II	NP_565451	nucleic acid binding / zinc ion binding [Arabidopsis thaliana]	TC151164	similar to UP|Q8S8S8_ARATH (Q8S8S8) Expressed protein (At2g19385), partial (48%)	SGN-U281502
MICRO.1933.C1	0.600396	1.09201	1.07215	0.777001	0.501369	3.80728	0.808719	Group II	BAE91898	tobacco fibrillarin homolog [Nicotiana tabacum]	TC134439	homologue to UP|Q25C91_TOBAC (Q25C91) Tobacco fibrillarin homolog, complete	SGN-U269273
MICRO.1889.C11	1.44993	0.824838	1.85219	1.43649	1.1945	1.51905	1.36188	Group VI	ABC69419	CYP72A56 [Nicotiana tabacum]	TC160029	similar to UP|Q9LUD0_ARATH (Q9LUD0) Cytochrome P450, partial (18%)	SGN-U271905
MICRO.1872.C2	0.687797	0.93326	1.47677	2.21346	1.24482	1.54204	1.33798	Group VI	Q40392	TMV resistance protein N	TC135754	similar to UP|Q75WV4_TOBAC (Q75WV4) N protein (Fragment), partial (9%)	SGN-U295290
MICRO.1857.C2	1.4461	0.55779	0.826746	1.13779	1.32761	0.468494	2.27634	Group IV	CAA66948	protein induced upon tuberization [Solanum demissum]	TC146947	UP|Q41321_SOLDE (Q41321) Protein induced upon tuberization, complete	SGN-U287331
MICRO.1857.C1	1.01859	0.649937	0.875563	1.47992	1.0112	0.345697	1.99826	Group IV	CAA66948	protein induced upon tuberization [Solanum demissum]	TC142444	homologue to UP|Q41321_SOLDE (Q41321) Protein induced upon tuberization, complete	SGN-U269329
MICRO.18285.C1	1.44982	0.743816	0.913185	1.07149	2.23703	2.67082	1.01548	Group I	Q9SV13	Sulfate transporter 3.1 (AST12) (AtST1)	DN907524		SGN-U294788
MICRO.1828.C2	1.06499	1.10403	1.01204	0.585614	0.611295	3.20591	0.775211	Group II	NP_174447	unknown protein [Arabidopsis thaliana]	TC143395	similar to UP|Q6EQN5_ORYSA (Q6EQN5) Bystin (51.6 kD)-like, partial (39%)	SGN-U277936
MICRO.18257.C1	1.23641	0.856091	0.939474	0.611787	6.10922	18.2678	0.356639	Group I	AAZ94187	Kunitz-type protease inhibitor precursor [Solanum tuberosum]	TC137304	similar to UP|API7_SOLTU (Q41448) Aspartic protease inhibitor 7 precursor (Cathepsin D inhibitor p749), partial (52%)	SGN-U282403
MICRO.1825.C5	1.89207	0.723677	1.11277	0.846077	1.52365	4.24924	1.19866	Group I	AAC06242	late embryogenis abundant protein 5 [Nicotiana tabacum]	TC151063	similar to UP|Q42475_LYCES (Q42475) Heat shock protein (Lycopersicum esculentum mRNA sequence), partial (76%)	SGN-U269722
MICRO.1825.C2	1.52259	0.592491	1.10098	1.15357	1.03174	3.91195	0.784712	Group I	AAC06242	late embryogenis abundant protein 5 [Nicotiana tabacum]	TC146887	similar to UP|O65149_TOBAC (O65149) Late embryogenis abundant protein 5, partial (84%)	SGN-U269719
MICRO.18092.C1	1.04733	1.25768	0.947544	2.93508	15.5622	0.865513	1.01482	Group VII	NP_188302	PLDP1; phospholipase D [Arabidopsis thaliana]	TC158842	similar to UP|PLDP1_ARATH (Q9LRZ5) Phospholipase D p1 (AtPLDp1) (Phospholipase D1 PHOX and PX containing domain) (Phospholipase D zeta 1) (PLDzeta1) , partial (5%)	SGN-U282621
MICRO.18059.C1	1.61354	0.645712	2.11998	2.40784	1.19968	1.49414	1.4209	Group VI	NA	NA	TC159526		SGN-U282908
MICRO.1805.C2	0.90229	0.747775	1.89505	1.70336	1.59185	1.62725	1.40881	Group VI	EAY90398	hypothetical protein OsI_011631 [Oryza sativa (indica cultivar-group)]	TC158799	weakly similar to UP|Q60EC7_ORYSA (Q60EC7) C1-like domain containing protein, partial (19%)	SGN-U282081
MICRO.18049.C1	1.44526	1.32908	0.931625	1.08694	2.30142	0.77949	2.03157	Group IV	AAB52786	NADH nitrate reductase [Solanum tuberosum]	TC136357	UP|Q8LT13_SOLTU (Q8LT13) Nitrate reductase, complete	SGN-U271417
MICRO.18038.C1	0.962697	0.752177	1.75624	1.70291	1.39535	2.81775	0.905958	Group VI	NP_199383	AT-HSFA4C; DNA binding / transcription factor [Arabidopsis thaliana]	CV498961		SGN-U295640
MICRO.18035.C1	0.986303	1.89555	1.02982	1.54847	8.86655	2.46787	0.424159	Group VII	NP_188220	SULTR3;4 (sulfate transporter); sulfate transporter [Arabidopsis thaliana]	TC159375	weakly similar to UP|SUT34_ARATH (Q9LW86) Probable sulfate transporter 3.4, partial (15%)	SGN-U285654
MICRO.18033.C1	0.750342	1.70847	0.754122	16.3995	1.59154	0.275807	2.20729	Group VIII	NA	NA	TC147482		SGN-U285398
MICRO.18010.C1	1.20146	0.836093	0.987124	0.919095	1.70801	2.0836	1.23405	Group I	AAM63118	unknown [Arabidopsis thaliana]	TC144029		SGN-U283995
MICRO.17986.C1	1.43674	0.863713	0.794538	1.91105	1.84694	2.11928	0.456894	Group I	NA	NA	TC157832	weakly similar to UP|O49036_GRACH (O49036) ORF12, partial (24%)	SGN-U281285
MICRO.17979.C1	1.59107	1.27786	1.6508	0.509246	1.76599	0.632998	0.972761	Group IV	AAG50803	zinc finger protein, putative [Arabidopsis thaliana]	TC146641		SGN-U285081
MICRO.1795.C3	0.42252	0.979354	0.985081	0.955046	0.644241	2.16492	0.940146	Group II	CAA61511	mitochondrial elongation factor Tu [Arabidopsis thaliana]	DN849170		SGN-U273682
MICRO.17942.C1	0.671144	0.76017	1.63647	2.21892	1.18438	2.91416	0.754501	Group VI	P09761	Wound-induced protein WIN1 precursor	TC158588	UP|WIN1_SOLTU (P09761) Wound-induced protein WIN1 precursor, complete	SGN-U292885
MICRO.17911.C1	0.761539	1.42187	1.02831	1.06854	0.60627	0.547688	0.890694	Group V	AAK58634	SMC2-like condensin [Arabidopsis thaliana]	TC148764	similar to UP|Q9SN90_ARATH (Q9SN90) Chromosome assembly protein homolog, partial (17%)	SGN-U286130
MICRO.1790.C1	0.552048	0.91954	0.92492	1.17707	0.621502	0.676538	0.997583	Group III	CAA12400	protoporphyrinogen oxidase [Solanum tuberosum]	TC133800	UP|O64384_SOLTU (O64384) Protoporphyrinogen oxidase , partial (57%)	SGN-U284845
MICRO.17898.C1	1.08624	1.19941	1.05264	0.64346	1.88478	1.87363	0.55246	Group I	NP_850100	unknown protein [Arabidopsis thaliana]	TC160484	similar to UP|Q6NLE8_ARATH (Q6NLE8) At2g27385, partial (20%)	SGN-U285172
MICRO.17886.C1	0.662561	1.21948	1.05906	0.942632	0.548571	1.4366	0.928442	Group II	ABB16983	unknown [Solanum tuberosum]	TC134029	similar to UP|RL5_CUCSA (Q6UNT2) 60S ribosomal protein L5, complete	SGN-U268344
MICRO.17862.C1	1.35762	1.19793	0.884843	0.640043	1.15076	0.494534	1.5248	Group V	NA	NA	TC159215		SGN-U295966
MICRO.17856.C1	0.793152	0.893366	1.65518	1.87182	1.00136	1.37441	1.1678	Group VI	ABD96834	hypothetical protein [Cleome spinosa]	TC144940	weakly similar to UP|COBL4_ARATH (Q9LFW3) COBRA-like protein 4 precursor, partial (55%)	SGN-U298192
MICRO.17852.C1	1.25737	0.72104	1.44682	0.899261	1.03007	2.56356	1.67053	Group I	EAZ02195	hypothetical protein OsI_023427 [Oryza sativa (indica cultivar-group)]	TC154614	similar to UP|Q5Z8K9_ORYSA (Q5Z8K9) Zinc finger protein-like, partial (18%)	SGN-U281558
MICRO.1785.C1	0.619615	1.13009	0.901982	0.76638	0.565592	1.79591	1.06462	Group II	CAC69852	nucleic acid binding protein [Nicotiana tabacum]	TC133023	homologue to UP|Q93YF1_TOBAC (Q93YF1) Nucleic acid binding protein, partial (65%)	SGN-U270194
MICRO.17842.C1	0.418463	1.41381	1.39813	0.986108	0.962072	1.95754	2.03378	Group III	NA	NA	TC153791		SGN-U297716
MICRO.17816.C1	1.14665	2.11188	0.964197	0.761833	0.646291	1.59809	0.780964	Group I	ABD28527	Protein kinase [Medicago truncatula]	TC152658	weakly similar to UP|Q2HVC0_MEDTR (Q2HVC0) Protein kinase, partial (12%)	SGN-U284146
MICRO.1781.C3	0.648976	0.797682	1.02749	0.919395	1.09753	0.552741	0.898625	Group III	NP_565908	amino acid binding [Arabidopsis thaliana]	TC143590	similar to UP|O80644_ARATH (O80644) Expressed protein, partial (83%)	SGN-U269316
MICRO.17804.C1	0.975116	0.59632	1.01466	1.15454	0.976361	0.620276	1.36847	Group IV	NP_191775	transferase [Arabidopsis thaliana]	DN589456		SGN-U268883
MICRO.17803.C1	0.775092	1.1892	0.933806	1.77823	1.84516	1.07391	1.06338	Group VII	NP_187485	ATPK1; kinase [Arabidopsis thaliana]	CX161495		SGN-U293889
MICRO.17776.C1	0.590032	1.28433	1.01218	0.680096	0.637732	1.96724	0.848318	Group II	ABN05723	DNA polymerase V [Medicago truncatula]	TC155134	similar to UP|Q9FGF4_ARATH (Q9FGF4) Arabidopsis thaliana genomic DNA, chromosome 5, BAC clone:T12B11, partial (7%)	SGN-U272648
MICRO.17765.C1	1.08441	0.438561	1.08807	1.01311	1.16303	0.473062	1.07722	Group IV	NA	NA	DN588993		SGN-U291747
MICRO.17727.C1	1.61288	0.82803	1.40107	2.7502	1.83047	3.07697	1.04297	Group VI	NA	NA	TC139180		SGN-U295740
MICRO.17719.C1	0.533175	0.908682	1.01517	0.788138	1.72849	1.54077	1.7799	Group I	ABO41848	putative calcium-binding protein [Gossypium hirsutum]	TC146794	similar to UP|Q9FI19_ARATH (Q9FI19) Calmodulin-like protein (At5g44460), partial (15%)	SGN-U282959
MICRO.17711.C1	0.680136	1.00168	0.910111	0.666224	0.295718	2.99971	0.958794	Group II	AAM65990	unknown [Arabidopsis thaliana]	TC137268	similar to UP|Q93Z42_ARATH (Q93Z42) AT5g19750/T29J13_170, partial (56%)	SGN-U296492
MICRO.17648.C1	0.738676	1.31062	1.46953	1.078	0.711164	0.365817	0.598684	Group V	CAJ77500	putative kiwellin ripening-related protein precursor [Solanum tuberosum]	TC135119	similar to UP|KIWEL_ACTCH (P84527) Kiwellin (Allergen Act c ?), partial (55%)	SGN-U284493
MICRO.17634.C1	0.859267	1.03251	1.27684	1.83323	1.2446	1.62272	0.555545	Group VI	NP_181207	oxidoreductase, acting on paired donors, with incorporation or reduction of molecular oxygen, 2-oxoglutarate as one donor, and incorporation of one atom each of oxygen into both donors [Arabidopsis thaliana]	TC144156	similar to RF|NP_181207.2|42569681|NM_129224 oxidoreductase, acting on paired donors, with incorporation or reduction of molecular oxygen, 2-oxoglutarate as one donor, and incorporation of one atom each of oxygen into both donors {Arabidopsis thaliana} (exp=-1; wgp=0; cg=0), partial (34%)	SGN-U279853
MICRO.17613.C1	1.27203	0.773185	0.998696	1.11449	1.95845	1.61183	0.928253	Group I	CAC44032	snakin-1 [Solanum tuberosum]	TC157698	similar to UP|Q948Z4_SOLTU (Q948Z4) Snakin-1, partial (93%)	SGN-U284310
MICRO.17599.C1	1.35351	1.04043	3.22932	4.86412	1.3168	2.98071	1.00307	Group VI	BAA78417	NAC-domain protein [Nicotiana tabacum]	TC136926	homologue to UP|Q9SXQ0_TOBAC (Q9SXQ0) NAC-domain protein, partial (74%)	SGN-U299003
MICRO.17578.C1	0.903189	0.863744	1.50179	1.6402	1.12122	1.07524	1.19729	Group VI	AAD16139	DNA-binding protein 2 [Nicotiana tabacum]	TC152650	similar to UP|Q9ZPL6_TOBAC (Q9ZPL6) DNA-binding protein 2, partial (19%)	SGN-U293386
MICRO.1751.C42	1.73983	0.516778	0.582421	0.90213	1.73331	2.5683	0.114675	Group I	AAO23566	serine protease inhibitor [Solanum tuberosum]	TC141845	homologue to UP|API7_SOLTU (Q41448) Aspartic protease inhibitor 7 precursor (Cathepsin D inhibitor p749), partial (79%)	SGN-U290724
MICRO.1751.C37	2.02726	0.654679	0.956621	1.01746	2.72625	3.47346	0.148083	Group I	Q41448	Aspartic protease inhibitor 7 precursor (Cathepsin D inhibitor p749)	TC139708	homologue to UP|API10_SOLTU (Q03197) Aspartic protease inhibitor 10 precursor (Wound-induced aspartate proteinase CDI inhibitor), complete	SGN-U281137
MICRO.1751.C25	2.23118	0.624009	0.900876	0.636715	2.43258	5.34952	0.107345	Group I	Q03197	Aspartic protease inhibitor 10 precursor (Wound-induced aspartate proteinase CDI inhibitor)	TC139708	homologue to UP|API10_SOLTU (Q03197) Aspartic protease inhibitor 10 precursor (Wound-induced aspartate proteinase CDI inhibitor), complete	SGN-U281137
MICRO.1751.C12	2.39627	0.515151	0.750039	0.818061	2.43864	2.94377	0.106875	Group I	Q41448	Aspartic protease inhibitor 7 precursor (Cathepsin D inhibitor p749)	CN514949	similar to SP|Q41448|API7_SOLTU Aspartic protease inhibitor 7 precursor (Cathepsin D inhibitor p749). {Solanum tuberosum;}, partial (53%)	SGN-U281151
MICRO.17471.C1	1.12119	1.11232	1.09713	1.61431	0.986617	1.53224	0.785537	Group VIII	AAG25966	cytokinin-regulated kinase 1 [Nicotiana tabacum]	TC144159	similar to UP|Q9FUK3_TOBAC (Q9FUK3) Cytokinin-regulated kinase 1, partial (29%)	SGN-U276602
MICRO.17467.C1	1.62305	0.539122	1.08538	2.04167	1.82107	0.878846	0.683803	Group VII	AAY98500	senescence-inducible chloroplast stay-green protein 1 [Lycopersicon esculentum]	TC144742	similar to UP|Q4JFW8_LYCES (Q4JFW8) Senescence-inducible chloroplast stay-green protein 1, partial (24%)	SGN-U272740
MICRO.17424.C1	0.429265	0.87698	1.02193	1.14994	1.03091	0.629475	1.29086	Group III	AAM98096	AT3g13690/MMM17_12 [Arabidopsis thaliana]	TC135995	similar to UP|Q8L741_ARATH (Q8L741) AT3g13690/MMM17_12, partial (20%)	SGN-U298840
MICRO.17411.C1	0.740012	1.50908	1.0075	1.28413	0.60955	0.596246	0.585575	Group V	ABA18101	unknown [Olimarabidopsis pumila]	TC145802		SGN-U295650
MICRO.17385.C1	0.442062	2.32953	1.06	1.42488	1.53835	0.899823	1.07088	Group III	NA	NA	TC162429	weakly similar to UP|Q05164_YEAST (Q05164) AOF1001 protein, partial (3%)	SGN-U289631
MICRO.17360.C1	1.17799	1.04424	0.848549	0.616576	0.583551	1.22103	1.0752	Group II	AAM64570	unknown [Arabidopsis thaliana]	TC142052	similar to GB|CAB10420.1|2245000|ATFCA6 LET1 like protein {Arabidopsis thaliana} (exp=0; wgp=1; cg=0), partial (7%)	SGN-U296030
MICRO.17348.C1	0.617794	0.898953	0.937812	0.48942	1.00672	3.83786	1.53675	Group I	ABN08611	CBS [Medicago truncatula]	TC142399	weakly similar to UP|Q5HZ39_ARATH (Q5HZ39) At4g27460, partial (20%)	SGN-U291752
MICRO.17306.C1	1.51679	0.888209	1.77052	1.68034	1.4527	1.77769	0.902757	Group VI	ABA39425	putative WRKY transcription factor [Capsicum frutescens]	TC155701	similar to UP|Q2PJS3_SOYBN (Q2PJS3) WRKY21, partial (21%)	SGN-U293552
MICRO.17251.C1	1.07753	1.02651	0.925881	0.563063	0.499621	1.99103	0.811245	Group II	BAA97293	unnamed protein product [Arabidopsis thaliana]	TC142227	similar to UP|Y5486_ARATH (Q8L8Q8) Protein At5g64816 precursor, partial (94%)	SGN-U283857
MICRO.17235.C1	0.886369	0.627763	0.834826	1.1224	0.992051	0.638166	1.2315	Group IV	AAD25162	proline transporter 3 [Lycopersicon esculentum]	TC136949	homologue to UP|Q9XE50_LYCES (Q9XE50) Proline transporter 3, partial (28%)	SGN-U292158
MICRO.1721.C1	0.59061	1.16761	0.922839	0.50653	0.716867	0.883453	1.22517	Group III	AAG59894	phosphoethanolamine N-methyltransferase [Lycopersicon esculentum]	TC138169	homologue to UP|Q9AXH3_LYCES (Q9AXH3) Phosphoethanolamine N-methyltransferase, partial (53%)	SGN-U277178
MICRO.17206.C1	1.01374	0.931799	1.00159	0.541795	0.502082	4.33823	0.921864	Group II	AAK18841	putative RNA polymerase I subunit [Oryza sativa]	TC159899	similar to RF|NP_566786.1|18404735|NM_113498 DNA binding {Arabidopsis thaliana} (exp=-1; wgp=0; cg=0), partial (39%)	SGN-U284789
MICRO.17170.C1	0.496754	0.966453	1.10573	1.26866	1.59836	2.23989	1.04836	Group I	NA	NA	TC161605	homologue to UP|Q5MA10_TOBAC (Q5MA10) ATP synthase F0 subunit 9, complete	SGN-U280259
MICRO.17141.C1	1.76172	1.18969	0.951872	0.924921	2.07493	1.68392	0.623019	Group I	NA	NA	TC154293	homologue to UP|Q2UG71_ASPOR (Q2UG71) Nucleolar RNA-binding protein NIFK, partial (5%)	SGN-U277324
MICRO.1713.C2	1.19251	0.669162	1.11508	1.51764	2.17853	1.08086	1.06795	Group VII	ABA46788	unknown [Solanum tuberosum]	TC132910	similar to UP|Q5MCR8_9ASTR (Q5MCR8) Aluminum-induced protein, complete	SGN-U268471
MICRO.1708.C2	0.441832	0.845916	1.0145	0.846832	0.527117	1.19324	0.901425	Group III	ABE93325	Peptidase S10, serine carboxypeptidase [Medicago truncatula]	TC136146	weakly similar to GB|AAM47382.1|21360533|AY113074 At2g22970/T20K9.18 {Arabidopsis thaliana} (exp=-1; wgp=0; cg=0), partial (52%)	SGN-U282456
MICRO.17079.C1	1.76482	1.28572	0.982317	0.659001	0.801799	0.56487	0.981695	Group V	Q941P9	Non-symbiotic hemoglobin 2 (Hb2) (SOLly GLB2)	NA	NA
MICRO.17077.C1	0.517457	1.16315	0.999328	1.1764	0.880952	0.649557	0.824573	Group III	AAT28309	leucine-rich repeat receptor-like protein kinase [Pyrus pyrifolia]	TC135917	similar to UP|Q6J330_PYRPY (Q6J330) Leucine-rich repeat receptor-like protein kinase (Fragment), partial (31%)	SGN-U293891
MICRO.1707.C7	0.974358	1.13699	1.85014	2.41475	1.13404	1.22528	1.27724	Group VI	ABE89192	Protein kinase [Medicago truncatula]	TC145442	weakly similar to UP|Q9LKY7_ORYSA (Q9LKY7) Receptor-like kinase, partial (37%)	SGN-U278824
MICRO.1707.C3	0.856655	0.8709	1.84624	1.78573	1.22588	1.47494	1.2795	Group VI	ABE89190	Protein kinase [Medicago truncatula]	TC151334	weakly similar to UP|Q5N7S4_ORYSA (Q5N7S4) Receptor serine/threonine kinase PR5K-like, partial (35%)	SGN-U269024
MICRO.17046.C1	1.57119	0.842206	1.01839	1.38712	1.35074	1.59184	1.08384	Group I	NP_191611	unknown protein [Arabidopsis thaliana]	TC152398		SGN-U295286
MICRO.17011.C2	1.23504	0.893654	1.01489	1.16531	1.1684	1.90281	1.92714	Group I	NP_193556	purine transporter [Arabidopsis thaliana]	TC161432	similar to UP|Q6FMR1_CANGA (Q6FMR1) Candida glabrata strain CBS138 chromosome K complete sequence, partial (3%)	SGN-U283452
MICRO.16957.C1	0.357885	1.02764	1.11028	1.21845	1.63772	0.824859	0.278942	Group III	BAA05473	tumor-related protein [Nicotiana glauca x Nicotiana langsdorffii]	TC144609	similar to UP|Q40448_9SOLA (Q40448) Tumor-related protein (Fragment), partial (93%)	SGN-U269202
MICRO.16947.C1	2.26902	1.03198	0.882737	0.982439	1.54954	1.34562	0.888374	Group I	EAY98550	hypothetical protein OsI_019783 [Oryza sativa (indica cultivar-group)]	TC149951		SGN-U292273
MICRO.16944.C1	1.25777	1.85431	1.24007	4.65196	12.9428	2.10802	1.03662	Group VII	NP_566891	sugar porter/ transporter [Arabidopsis thaliana]	TC162930		SGN-U294538
MICRO.16942.C1	0.944777	1.36325	1.00902	1.46085	3.31986	2.07781	0.984136	Group VII	AAT37529	purple acid phosphatase 1 [Solanum tuberosum]	TC151982	similar to UP|Q8S341_ARATH (Q8S341) Purple acid phosphatase, partial (84%)	SGN-U297248
MICRO.16939.C1	0.935731	0.542245	0.803765	0.521183	0.394554	0.852145	2.35179	Group III	NP_001050156	Os03g0360700 [Oryza sativa (japonica cultivar-group)]	TC161443	weakly similar to UP|Q9Y7K1_SCHPO (Q9Y7K1) SPBC216.04c protein, partial (48%)	SGN-U285875
MICRO.1690.C2	1.15628	0.614292	1.5723	1.03096	1.06598	0.594232	0.925697	Group IV	ABC69380	CYP81C6v2 [Nicotiana tabacum]	TC142779	weakly similar to UP|Q9LXB3_ARATH (Q9LXB3) Cytochrome P450-like protein, partial (23%)	SGN-U279346
MICRO.16888.C1	1.20996	1.01701	1.5875	2.1571	1.33968	0.810776	0.911469	Group VII	ABC59095	cytochrome P450 monooxygenase CYP704G7 [Medicago truncatula]	CN212467	similar to UP|Q8S7S6 (Q8S7S6) Cytochrome P450-like protein, partial (24%)	SGN-U290406
MICRO.1687.C2	0.630296	0.627186	1.4563	1.30963	1.24977	0.930701	0.907992	Group III	AAB58728	cytosolic NADP-malic enzyme [Lycopersicon esculentum]	TC133876	UP|O04936_LYCES (O04936) Cytosolic NADP-malic enzyme , complete	SGN-U269798
MICRO.16863.C1	1.1688	0.403046	0.688206	0.552725	0.18391	8.07861	1.49461	Group II	ABN05810	Protein of unknown function DUF506, plant [Medicago truncatula]	TC143938		SGN-U282755
MICRO.16856.C1	1.22557	0.558259	1.17847	1.1514	1.76176	1.69343	1.33422	Group I	NP_201515	unknown protein [Arabidopsis thaliana]	TC151931	weakly similar to UP|Q5VRR5_ORYSA (Q5VRR5) F-box family protein-like, partial (58%)	SGN-U280990
MICRO.16821.C1	1.32516	0.703159	0.735105	0.588049	0.685013	1.2584	0.190364	Group V	CAA68993	glutathione S-transferase [Petunia x hybrida]	TC158946	similar to UP|O24261_PETHY (O24261) Glutathione S-transferase, partial (70%)	SGN-U279921
MICRO.16791.C1	0.544669	0.666615	1.26239	1.69139	1.74635	3.75686	1.66903	Group I	NA	NA	CN213681		SGN-U290471
MICRO.16772.C1	1.613	0.944465	1.49287	2.43468	2.90792	1.74235	0.92443	Group VII	CAA67395	inorganic phosphate transporter 1 [Solanum tuberosum]	TC132815	UP|Q43650_SOLTU (Q43650) Inorganic phosphate transporter 1, complete	SGN-U274200
MICRO.16751.C1	1.62019	1.05607	3.4779	0.216792	1.34215	0.719738	0.938107	Group IV	NA	NA	TC152229	weakly similar to UP|Q44KW6_CHRSL (Q44KW6) UvrD/REP helicase, partial (3%)	SGN-U278031
MICRO.16737.C2	1.74749	0.903021	0.924491	1.14068	1.17943	1.52176	1.59359	Group I	ABF06706	UP-9A [Nicotiana tabacum]	TC146356		SGN-U273386
MICRO.16737.C1	1.28145	0.778152	0.811481	0.688409	0.765948	1.89956	1.72144	Group I	ABF06706	UP-9A [Nicotiana tabacum]	TC161349		SGN-U273385
MICRO.16727.C1	1.31666	1.09513	2.1779	1.93572	0.912038	1.69474	0.871401	Group VI	AAR92477	putative WRKY transcription factor 30 [Vitis aestivalis]	TC141595	similar to UP|WRK53_ARATH (Q9SUP6) Probable WRKY transcription factor 53 (WRKY DNA-binding protein 53), partial (20%)	SGN-U283229
MICRO.16718.C1	1.29682	0.962682	1.56065	1.19664	0.672561	6.60327	0.848178	Group I	AAM95458	calmodulin-like protein [Datura metel]	TC143774	homologue to UP|Q6DUX2_LYCES (Q6DUX2) Regulator of gene silencing, partial (66%)	SGN-U281669
MICRO.16716.C1	1.15536	1.05393	1.00934	2.02891	4.73477	0.985527	0.955161	Group VII	AAK50066	AT5g20410/F5O24_300 [Arabidopsis thaliana]	CK860954	similar to PIR|T52269|T52269 1 2-diacylglycerol 3-beta-galactosyltransferase () [imported] - Arabidopsis thaliana, partial (27%)	SGN-U289389
MICRO.16709.C1	1.34625	1.10228	1.27818	1.21402	1.73977	2.21094	1.43126	Group I	NP_568502	ubiquitin-protein ligase [Arabidopsis thaliana]	TC135291	weakly similar to RF|NP_568094.2|30679379|NM_120250 ubiquitin-protein ligase {Arabidopsis thaliana} (exp=-1; wgp=0; cg=0), partial (10%)	SGN-U294187
MICRO.167.C1	0.641566	0.790116	0.920809	0.598023	0.647748	1.93489	0.938253	Group II	NP_001067233	Os12g0607100 [Oryza sativa (japonica cultivar-group)]	TC150584	homologue to UP|Q2QME5_ORYSA (Q2QME5) Translation initiation factor eIF-2 gamma chain F20D22.6, partial (47%)	SGN-U271160
MICRO.16690.C2	0.816624	0.47981	1.07923	1.03455	0.478541	0.863518	0.931505	Group V	ABE79185	Inositol 1, 3, 4-trisphosphate 56-kinase [Medicago truncatula]	TC142435	weakly similar to UP|ITPK1_MAIZE (Q84Y01) Inositol-tetrakisphosphate 1-kinase 1 (Inositol-triphosphate 5/6-kinase 1) (Inositol 1,3,4-trisphosphate 5/6-kinase 1) (ZmIpk) (Low phytic acid protein 2) , partial (46%)	SGN-U283089
MICRO.16690.C1	0.866442	0.494192	1.05689	0.738884	0.515573	0.771759	0.797968	Group V	ABE79185	Inositol 1, 3, 4-trisphosphate 56-kinase [Medicago truncatula]	TC142435	weakly similar to UP|ITPK1_MAIZE (Q84Y01) Inositol-tetrakisphosphate 1-kinase 1 (Inositol-triphosphate 5/6-kinase 1) (Inositol 1,3,4-trisphosphate 5/6-kinase 1) (ZmIpk) (Low phytic acid protein 2) , partial (46%)	SGN-U283089
MICRO.16666.C1	1.35579	0.974091	1.25061	0.856629	1.03475	3.17473	1.73509	Group I	BAD98961	2-oxoglutarate-dependent dioxygenase [Solanum lycopersicum]	TC157994	homologue to UP|Q4W8D2_LYCES (Q4W8D2) 2-oxoglutarate-dependent dioxygenase, partial (60%)	SGN-U290474
MICRO.16662.C2	1.61471	1.65574	1.05886	2.09053	1.428	0.633409	0.963066	Group VIII	NA	NA	TC156388		SGN-U276799
MICRO.16636.C1	0.655621	1.19455	0.806779	0.914319	0.592408	2.72147	0.842904	Group II	NP_001053677	Os04g0585300 [Oryza sativa (japonica cultivar-group)]	TC136846	similar to UP|Q8VZE1_ARATH (Q8VZE1) At2g17250/T23A1.11, partial (16%)	SGN-U295905
MICRO.16605.C1	1.35341	0.807928	0.730661	0.820233	0.516072	2.32091	1.76662	Group I	NA	NA	TC156102	homologue to UP|Q9SDP3_ALLCE (Q9SDP3) APS-reductase, partial (5%)	SGN-U299060
MICRO.16601.C1	1.4135	0.813365	1.19581	1.09534	1.13025	2.55993	1.95639	Group I	NP_180763	N-acetyltransferase [Arabidopsis thaliana]	TC141607	similar to RF|NP_180762.1|15225172|NM_128762 N-acetyltransferase {Arabidopsis thaliana} (exp=-1; wgp=0; cg=0), partial (49%)	SGN-U298207
MICRO.16594.C1	1.45662	0.783564	3.15028	1.88919	2.16661	4.05399	1.88055	Group I	BAB88934	glucosyltransferase NTGT3 [Nicotiana tabacum]	CV506223		SGN-U293396
MICRO.16578.C1	2.18356	0.924898	0.91871	1.05523	1.7804	2.10172	0.195388	Group I	NA	NA	TC159443	UP|CYT_SOLTU (Q03196) Cysteine proteinase inhibitor (Fragment), complete	SGN-U277610
MICRO.16572.C1	0.447633	1.01687	0.710061	0.900748	1.0407	0.496964	0.865943	Group III	ABE77964	Glycoside hydrolase, family 17; X8 [Medicago truncatula]	TC138076		SGN-U283073
MICRO.16548.C1	1.05995	1.81547	1.1454	1.28935	0.706958	0.446649	0.55238	Group V	BAA90481	phytocyanin-related protein [Ipomoea nil]	CV506081		SGN-U285658
MICRO.16521.C1	1.53417	2.24271	1.53797	1.3082	1.94961	0.971504	1.45515	Group VIII	NP_181270	ALS3 (ALUMINUM SENSITIVE 3) [Arabidopsis thaliana]	TC159979	similar to GB|AAV49319.1|55275047|AY687991 aluminum sensitive 3 {Arabidopsis thaliana} (exp=-1; wgp=0; cg=0), partial (18%)	SGN-U294313
MICRO.16516.C1	1.57637	1.19106	0.95786	0.978742	0.886652	1.61767	0.988295	Group I	NP_564283	unknown protein [Arabidopsis thaliana]	TC153291		SGN-U286221
MICRO.16447.C1	1.05904	0.963689	1.0138	1.12103	1.72957	1.55002	0.971913	Group I	NP_849342	catalytic [Arabidopsis thaliana]	TC153868	similar to RF|NP_849342.1|30680654|NM_179011 catalytic {Arabidopsis thaliana} (exp=-1; wgp=0; cg=0), partial (71%)	SGN-U281833
MICRO.16413.C1	1.10815	1.02997	0.917685	0.621641	0.837113	0.335502	0.724007	Group IV	CAC09928	hypothetical protein [Catharanthus roseus]	TC152160		SGN-U281498
MICRO.1639.C3	0.590944	0.976872	0.884341	0.920468	0.649769	1.75404	0.948488	Group II	NP_194773	GAE1 (UDP-D-GLUCURONATE 4-EPIMERASE 1); NAD binding / catalytic [Arabidopsis thaliana]	CO502794		SGN-U273643
MICRO.1639.C2	0.654715	1.21979	0.901294	0.821836	0.574445	1.65572	0.857092	Group II	NP_001049561	Os03g0249500 [Oryza sativa (japonica cultivar-group)]	TC137422	similar to UP|Q9M0B6_ARATH (Q9M0B6) Nucleotide sugar epimerase-like protein (UDP-D-glucuronate 4-epimerase) , partial (94%)	SGN-U273643
MICRO.16389.C1	1.36564	1.10013	0.951296	0.633857	0.66189	2.03923	0.974128	Group II	EAZ03076	hypothetical protein OsI_024308 [Oryza sativa (indica cultivar-group)]	TC159254	similar to UP|Q9LQ42_ARATH (Q9LQ42) T30E16.32, partial (11%)	SGN-U292014
MICRO.1635.C1	0.561981	1.00159	0.937187	0.584346	1.33587	0.67357	0.445411	Group IV	NP_568422	unknown protein [Arabidopsis thaliana]	TC156274		SGN-U283406
MICRO.16343.C1	1.09332	0.837131	0.926633	1.12091	1.60515	1.83593	1.54913	Group I	NA	NA	TC160651		SGN-U285511
MICRO.1634.C1	1.1053	1.01885	0.968761	0.591583	0.510484	1.03729	0.271262	Group V	CAJ43712	caffeoyl-CoA O-methyltransferase [Plantago major]	TC138432	similar to UP|CAMT_POPKI (P93711) Caffeoyl-CoA O-methyltransferase (Trans-caffeoyl-CoA 3-O-methyltransferase) (CCoAMT) (CCoAOMT) , partial (83%)	SGN-U273220
MICRO.1632.C1	0.987271	1.22007	0.919346	0.882017	0.269728	0.468366	1.00414	Group V	P35057	Histone H4	TC149520	GB|AAB94924.1|2746721|AF038387 histone H4 {Capsicum annuum} (exp=-1; wgp=0; cg=0), complete	SGN-U268359
MICRO.16291.C1	0.768675	1.20778	1.06576	1.04379	0.666092	0.657409	0.804791	Group V	EAY84551	hypothetical protein OsI_005784 [Oryza sativa (indica cultivar-group)]	TC155298	similar to UP|Q3EAA4_ARATH (Q3EAA4) Protein At4g05520, partial (19%)	SGN-U291855
MICRO.1629.C1	0.405324	0.920976	1.09668	0.57278	0.676285	2.17349	0.860888	Group II	ABE78291	Helicase, C-terminal [Medicago truncatula]	TC150628	similar to UP|Q2QQW2_ORYSA (Q2QQW2) RNA helicase RH28, partial (18%)	SGN-U274676
MICRO.16230.C1	1.46757	1.26028	0.999012	0.882168	0.634255	0.682636	0.644366	Group V	AAO18638	cystatin [Malus x domestica]	TC146539	weakly similar to RF|NP_914820.1|34906946|NM_189931 cysteine proteinase inhibitor Scb-like protein {Oryza sativa (japonica cultivar-group)} (exp=-1; wgp=0; cg=0), partial (11%)	SGN-U282233
MICRO.16218.C1	1.19104	1.23922	0.685188	0.657201	0.794261	2.28951	0.502486	Group II	P19243	18.1 kDa class I heat shock protein (HSP 18.1)	TC144448	weakly similar to UP|Q41028_PEA (Q41028) Pisum sativum 17.9 kDa heat shock protein (hsp17.9) (Fragment), partial (48%)	SGN-U298302
MICRO.1612.C1	1.25084	1.10386	0.878697	0.834557	0.822119	0.457195	0.620695	Group V	ABF59232	unknown protein [Arabidopsis thaliana]	TC158558	weakly similar to GB|AAP54875.1|31433346|AE016959 expressed protein {Oryza sativa (japonica cultivar-group)} (exp=0; wgp=1; cg=0), partial (28%)	SGN-U296209
MICRO.16101.C1	0.550884	1.12201	1.1692	1.04731	0.867546	0.400666	0.739933	Group III	AAF79870	T7N9.27 [Arabidopsis thaliana]	TC141150	weakly similar to UP|Q8VYW3_ARATH (Q8VYW3) AT5g62580/K19B1_19, partial (12%)	SGN-U297107
MICRO.1606.C1	0.586151	0.938419	1.03385	0.843986	0.655852	1.02221	1.09958	Group III	CAA76701	cyclin-dependent protein kinase p34cdc2 [Solanum lycopersicum]	TC158730	similar to UP|O65839_LYCES (O65839) Cyclin-dependent protein kinase p34cdc2, partial (66%)	SGN-U269836
MICRO.15988.C1	1.09361	0.81001	0.879318	0.55656	0.57732	0.948518	0.383615	Group V	P51092	Leucoanthocyanidin dioxygenase (LDOX) (Leucocyanidin oxygenase) (Leucoanthocyanidin hydroxylase)	TC154663	similar to UP|LDOX_PETHY (P51092) Leucoanthocyanidin dioxygenase (LDOX) (Leucocyanidin oxygenase) (Leucoanthocyanidin hydroxylase) , partial (35%)	SGN-U296371
MICRO.15980.C3	0.972124	1.34501	0.957436	0.835802	0.939381	0.420778	0.588743	Group V	NA	NA	TC157073	similar to UP|LECT_SOLTU (Q9S8M0) Chitin-binding lectin 1 precursor (PL-I), partial (11%)	SGN-U273097
MICRO.15954.C1	0.580427	0.633662	0.851648	0.934177	1.12947	0.552185	1.14877	Group III	NP_194456	GH3.5 [Arabidopsis thaliana]	TC140156	similar to UP|GH35_ARATH (O81829) Indole-3-acetic acid-amido synthetase GH3.5 (Auxin-responsive GH3-like protein 5) (AtGH3-5) , partial (32%)	SGN-U289243
MICRO.15952.C1	0.696965	1.34476	0.711253	0.678893	0.730381	0.10317	0.390697	Group V	CAF88611	unnamed protein product [Tetraodon nigroviridis]	TC150432	weakly similar to UP|K1C14_MOUSE (Q61781) Keratin, type I cytoskeletal 14 (Cytokeratin-14) (CK-14) (Keratin-14) (K14), partial (6%)	SGN-U271203
MICRO.15935.C1	1.6171	1.31144	1.05216	0.96326	1.99789	2.22207	0.818815	Group I	CAA43172	TDR8 [Solanum lycopersicum]	TC144764	homologue to UP|Q40172_LYCES (Q40172) TDR8 protein, partial (87%)	SGN-U283143
MICRO.15925.C1	1.13555	1.67447	1.14921	1.0735	0.632607	0.671148	0.637554	Group V	NP_565767	unknown protein [Arabidopsis thaliana]	TC140769	similar to UP|O22806_ARATH (O22806) Expressed protein, partial (50%)	SGN-U292150
MICRO.15918.C1	0.954655	0.709535	2.1086	1.78299	1.18126	1.2168	1.05157	Group VI	AAR92477	putative WRKY transcription factor 30 [Vitis aestivalis]	TC139851		SGN-U289132
MICRO.15912.C1	0.570351	1.02677	1.04746	1.1613	1.57105	0.412606	0.916084	Group III	BAF36749	telomere binding protein [Solanum lycopersicum]	TC142277	similar to UP|Q84ZU4_NICGU (Q84ZU4) Telomere binding protein TBP1, partial (40%)	SGN-U281670
MICRO.15909.C1	2.2951	1.09369	0.824813	9.69049	1.62072	0.862608	1.0156	Group VIII	ABE80838	Proteinase inhibitor I4, serpin; Protein kinase [Medicago truncatula]	TC139955	similar to GB|AAP37769.1|30725494|BT008410 At5g53450 {Arabidopsis thaliana} (exp=-1; wgp=0; cg=0), partial (20%)	SGN-U291691
MICRO.1588.C7	0.896162	0.939689	2.57132	5.54059	0.830895	1.13371	1.37798	Group VI	AAU95243	osmotin-like protein [Solanum tuberosum]	TC134222	homologue to UP|Q5XUH0_SOLTU (Q5XUH0) Osmotin-like protein, complete	SGN-U269310
MICRO.1588.C1	0.616831	0.913967	3.11008	3.11871	0.522939	1.44529	1.52817	Group VI	AAU95236	osmotin-like protein [Solanum phureja]	TC133443	UP|Q5XUH7_9SOLN (Q5XUH7) Osmotin-like protein, complete	SGN-U269312
MICRO.15787.C1	1.54664	0.777618	0.870497	0.528852	1.48333	0.930588	0.389259	Group I	NP_175630	transporter [Arabidopsis thaliana]	CV499288		SGN-U282873
MICRO.15728.C1	0.861095	1.4311	0.985888	0.944407	0.509122	0.350439	1.01304	Group V	YP_635620	maturase K [Solanum tuberosum]	TC132820	UP|MATK_SOLTU (P32088) Maturase K (Intron maturase), complete	SGN-U298548
MICRO.15707.C2	1.72174	1.06657	1.41009	0.66824	1.6391	0.630383	0.923451	Group IV	NP_200258	transcription factor/ zinc ion binding [Arabidopsis thaliana]	TC139061	similar to RF|NP_194461.1|15237049|NM_118865 transcription factor/ zinc ion binding {Arabidopsis thaliana} (exp=-1; wgp=0; cg=0), partial (30%)	SGN-U290503
MICRO.15707.C1	1.80635	1.09325	1.38183	0.652093	1.63647	0.617249	0.944912	Group IV	NP_200258	transcription factor/ zinc ion binding [Arabidopsis thaliana]	TC141995	weakly similar to RF|NP_194461.1|15237049|NM_118865 transcription factor/ zinc ion binding {Arabidopsis thaliana} (exp=-1; wgp=0; cg=0), partial (41%)	SGN-U290503
MICRO.1556.C1	0.737669	0.940517	1.0298	0.640419	0.560545	2.24691	0.878561	Group II	AAM63718	unknown [Arabidopsis thaliana]	TC153861	similar to UP|Q24JJ9_ARATH (Q24JJ9) At4g30840, partial (49%)	SGN-U293719
MICRO.15551.C1	0.521191	0.921695	0.955776	0.60566	0.507881	1.92486	1.10925	Group II	AAR06293	adenylosuccinate lyase [Nicotiana tabacum]	TC152410	similar to UP|Q6T7E9_TOBAC (Q6T7E9) Adenylosuccinate lyase , partial (25%)	SGN-U290676
MICRO.15526.C1	1.5214	1.01552	0.981859	0.690791	0.706635	1.67603	1.13074	Group II	ABO81175	Tetratricopeptide-like helical [Medicago truncatula]	CK719141		SGN-U292875
MICRO.15499.C1	1.07199	1.67762	1.26285	1.12691	0.77178	0.629365	0.58071	Group V	CAB56195	Knolle [Capsicum annuum]	TC135924	homologue to UP|Q9SML5_CAPAN (Q9SML5) Knolle, partial (67%)	SGN-U297007
MICRO.15474.C1	0.638074	1.83563	0.885928	1.35196	0.417336	0.670965	0.964233	Group V	NP_200393	unknown protein [Arabidopsis thaliana]	TC144651		SGN-U293700
MICRO.15472.C1	1.61657	1.41223	0.88968	1.70083	1.21804	0.994724	0.961651	Group VIII	NA	NA	TC158013		SGN-U280598
MICRO.15466.C1	1.18375	1.08145	1.00853	0.634339	0.661606	2.75932	0.986258	Group II	NP_190931	unknown protein [Arabidopsis thaliana]	DR035101		SGN-U285018
MICRO.15451.C1	0.761076	0.984166	0.989198	0.651093	0.618425	2.51315	0.985328	Group II	ABO80657	Nop14-like protein [Medicago truncatula]	TC143046	similar to UP|Q9LQB3_ARATH (Q9LQB3) F4N2.4, partial (10%)	SGN-U297109
MICRO.15427.C1	1.0198	1.2771	0.884837	0.804454	0.514113	0.64458	0.812782	Group V	NA	NA	TC149945	similar to UP|Q5TU44_ANOGA (Q5TU44) ENSANGP00000027141, partial (6%)	SGN-U269169
MICRO.15425.C2	1.33152	0.84241	1.10564	0.842952	0.713079	2.13671	1.754	Group I	AAO92257	gamma-aminobutyrate transaminase subunit precursor isozyme 3 [Lycopersicon esculentum]	DR034844		SGN-U294758
MICRO.15423.C1	0.340531	0.827189	1.50608	1.504	1.36336	1.35018	1.1413	Group III	AAM34765	nam-like protein 2 [Petunia x hybrida]	TC145078	similar to UP|Q8LRM3_PETHY (Q8LRM3) Nam-like protein 2, partial (27%)	SGN-U286182
MICRO.1541.C1	0.59891	0.624108	0.959947	0.691057	0.760749	0.88925	1.4245	Group III	NP_851035	GTP binding / translation elongation factor [Arabidopsis thaliana]	TC145227	similar to UP|Q6SYB1_TRIPR (Q6SYB1) GTP-binding protein TypA, partial (38%)	SGN-U275899
MICRO.15392.C1	1.04151	0.898324	0.92009	0.828406	1.66187	1.87433	0.76603	Group I	NP_191727	triacylglycerol lipase [Arabidopsis thaliana]	TC145989	similar to UP|Q5ZBH3_ORYSA (Q5ZBH3) Lipase class 3 family protein-like, partial (6%)	SGN-U298298
MICRO.15386.C1	0.442503	0.849176	0.980518	1.1896	1.01239	0.660735	1.13982	Group III	ABE90949	Putative methyltransferase, putative [Medicago truncatula]	TC142880	weakly similar to UP|Q9LMH1_ARATH (Q9LMH1) F16A14.7, partial (31%)	SGN-U295935
MICRO.15375.C1	0.98517	1.20768	0.90165	0.55797	0.408267	3.64731	0.757958	Group II	AAS76220	At4g15770 [Arabidopsis thaliana]	TC139621	similar to UP|Q6NM52_ARATH (Q6NM52) At4g15770, complete	SGN-U275550
MICRO.15345.C1	1.02917	1.35004	1.28767	1.40756	0.469286	0.889787	0.343173	Group V	NP_197129	unknown protein [Arabidopsis thaliana]	TC144577	similar to UP|Q8L7Z1_ARATH (Q8L7Z1) AT5g16250/T21H19_170, partial (84%)	SGN-U286455
MICRO.15342.C1	0.926783	2.57989	1.11215	1.62387	0.71719	0.500773	0.571747	Group V	AAN85207	DNA topoisomerase II [Nicotiana tabacum]	TC148323	similar to UP|Q8GSC4_TOBAC (Q8GSC4) DNA topoisomerase II, partial (10%)	SGN-U298531
MICRO.15340.C1	1.07309	1.27425	1.06051	1.09966	0.66095	0.620133	0.687766	Group V	CAB46641	cyclin A1 [Solanum lycopersicum]	TC142888	UP|Q9XGI5_LYCES (Q9XGI5) Cyclin A1, partial (23%)	SGN-U293976
MICRO.15330.C1	1.20513	1.57914	1.10962	1.24887	0.807945	0.657022	0.653344	Group V	BAB86283	kinesin-like protein NACK1 [Nicotiana tabacum]	TC139037	homologue to UP|Q8S950_TOBAC (Q8S950) Kinesin-like protein NACK1, partial (21%)	SGN-U297281
MICRO.1531.C4	0.855851	0.510729	1.12577	0.956896	1.05444	0.66482	1.22614	Group IV	NP_175630	transporter [Arabidopsis thaliana]	TC152706		SGN-U270997
MICRO.1530.C1	0.543895	0.75516	1.08892	0.933822	0.852661	0.513643	1.02703	Group III	BAA77842	ACE [Arabidopsis thaliana]	TC156297	similar to GB|BAA77842.1|4903018|AB027507 ACE {Arabidopsis thaliana} (exp=-1; wgp=0; cg=0), partial (56%)	SGN-U283071
MICRO.15294.C1	0.654288	0.988338	0.943257	0.791974	0.62147	1.77332	0.82224	Group II	NP_566360	protein binding [Arabidopsis thaliana]	TC140062	weakly similar to UP|Q9SF90_ARATH (Q9SF90) F8A24.6 protein, partial (78%)	SGN-U274966
MICRO.15271.C1	0.856521	0.560873	0.876115	0.971236	0.737503	1.60049	1.62046	Group III	NA	NA	TC157637		SGN-U289695
MICRO.15268.C2	1.57365	0.962514	1.00889	0.951417	1.83692	0.872231	0.624989	Group I	AAL67830	Kunitz-type enzyme inhibitor S9C11 [Solanum tuberosum]	TC138639	homologue to UP|Q8W126_SOLTU (Q8W126) Kunitz-type enzyme inhibitor S9C11, partial (93%)	SGN-U271022
MICRO.15224.C1	0.624583	1.33155	1.10187	1.25089	1.5332	2.34091	0.738188	Group I	NA	NA	TC161831	similar to UP|Q8VAG3_WSSV (Q8VAG3) Wsv453 (WSSV513), partial (9%)	SGN-U296054
MICRO.15209.C1	0.757912	1.23423	1.01329	0.650032	0.479395	3.65027	0.985116	Group II	AAY82264	hypothetical protein At2g47290 [Arabidopsis thaliana]	TC157997	similar to UP|Q2QZQ0_ORYSA (Q2QZQ0) Expressed protein, partial (9%)	SGN-U291242
MICRO.15204.C1	0.508001	0.656248	1.15662	0.99261	0.889321	0.87801	1.26383	Group III	CAC67408	insulin degrading enzyme [Solanum lycopersicum]	TC161582	homologue to UP|Q93YG9_LYCES (Q93YG9) Insulin degrading enzyme, partial (47%)	SGN-U277824
MICRO.1520.C12	1.10012	1.26454	1.37076	1.44767	2.50358	2.21925	0.514068	Group I	ABC55693	patatin protein 06 [Solanum tuberosum]	TC146516	homologue to UP|Q41467_SOLTU (Q41467) Potato patatin, partial (69%)	SGN-U278773
MICRO.15198.C2	1.07599	0.777012	1.39113	1.5023	1.97181	0.848567	0.885443	Group VII	NP_001062992	Os09g0363500 [Oryza sativa (japonica cultivar-group)]	BF154179		SGN-U291533
MICRO.15198.C1	1.50028	0.785003	1.20503	1.23603	1.56407	1.19655	0.794695	Group I	NP_001062992	Os09g0363500 [Oryza sativa (japonica cultivar-group)]	TC145817	similar to GB|AAL16213.1|16226611|AF428444 At1g01240/F6F3_11 {Arabidopsis thaliana} (exp=-1; wgp=0; cg=0), partial (7%)	SGN-U291533
MICRO.15148.C1	1.15555	1.1609	1.00525	0.767942	0.93696	0.453078	0.605313	Group V	BAA11766	high mobility group protein [Canavalia gladiata]	TC135820	weakly similar to UP|Q42461_CANGL (Q42461) High mobility group protein, partial (71%)	SGN-U273937
MICRO.15122.C1	1.14797	1.0738	0.725031	0.504757	0.557409	2.90166	0.920293	Group II	NP_188186	carboxylic ester hydrolase [Arabidopsis thaliana]	TC137821	similar to GB|AAQ62418.1|34146820|BT010417 At3g15650 {Arabidopsis thaliana} (exp=-1; wgp=0; cg=0), partial (98%)	SGN-U297829
MICRO.1511.C2	0.978737	1.11482	0.76212	0.608306	0.373076	1.21029	0.866484	Group II	NP_190977	kinase [Arabidopsis thaliana]	TC150514	similar to UP|Q9M394_ARATH (Q9M394) Fructokinase-like protein, partial (78%)	SGN-U282854
MICRO.1511.C1	0.513241	1.08244	0.759149	0.763036	0.413546	1.20966	0.839139	Group II	NP_190977	kinase [Arabidopsis thaliana]	TC150514	similar to UP|Q9M394_ARATH (Q9M394) Fructokinase-like protein, partial (78%)	SGN-U282854
MICRO.15084.C1	0.496132	0.754846	0.920365	0.869043	0.88657	0.462883	1.22868	Group III	P93111	Glutamyl-tRNA reductase 1, chloroplast precursor (GluTR)	TC141407	similar to UP|HEM11_CUCSA (P93111) Glutamyl-tRNA reductase 1, chloroplast precursor (GluTR) , partial (28%)	SGN-U295862
MICRO.1508.C2	1.10517	0.847604	1.72585	2.13478	1.04977	1.01727	1.08049	Group VI	AAF02840	Similar to serine/threonine kinases [Arabidopsis thaliana]	TC147699	weakly similar to UP|Q9SGU0_ARATH (Q9SGU0) T6H22.8.1 protein, partial (9%)	SGN-U285769
MICRO.15077.C1	0.915356	0.67188	0.828792	0.975165	0.660492	0.530716	0.98782	Group V	AAT37529	purple acid phosphatase 1 [Solanum tuberosum]	TC133425	homologue to UP|Q6J5M7_SOLTU (Q6J5M7) Purple acid phosphatase 1, complete	SGN-U298696
MICRO.15066.C1	1.61924	0.640869	1.95138	2.21579	1.3145	1.29611	1.23133	Group VI	BAC07504	receptor-like protein kinase [Nicotiana tabacum]	TC160837	similar to UP|Q8LP72_TOBAC (Q8LP72) Receptor-like protein kinase, partial (37%)	SGN-U283242
MICRO.15046.C1	1.14403	0.966759	0.932701	0.557921	1.79754	0.569056	0.733928	Group IV	NP_195474	HLS1 (HOOKLESS 1); N-acetyltransferase [Arabidopsis thaliana]	TC157142	similar to RF|NP_195474.1|15235633|NM_119922 HLS1 (HOOKLESS 1); N-acetyltransferase {Arabidopsis thaliana} (exp=-1; wgp=0; cg=0), partial (87%)	SGN-U296779
MICRO.15041.C1	1.83731	0.839443	1.3312	1.65974	2.14631	6.70573	0.491474	Group I	AAK56924	circadian clock coupling factor ZGT [Nicotiana tabacum]	TC134245	similar to UP|Q94FM9_TOBAC (Q94FM9) Circadian clock coupling factor ZGT, partial (78%)	SGN-U268276
MICRO.15022.C1	0.621185	1.14035	0.791587	1.28577	0.772237	0.612387	1.12165	Group III	NP_174489	unknown protein [Arabidopsis thaliana]	CK271095		SGN-U284759
MICRO.15000.C1	0.628724	0.592429	0.927495	1.05361	0.710064	0.368655	0.825398	Group IV	CAA07250	serine protease [Solanum lycopersicum]	TC162514	similar to UP|Q9ZR46_LYCES (Q9ZR46) P69C protein, partial (65%)	SGN-U294346
MICRO.1500.C1	0.918346	1.26193	1.0566	0.859564	0.616116	0.603229	1.05815	Group V	Q9M4Y3	30S ribosomal protein S10, chloroplast precursor	TC135142	similar to UP|Q5MD13_BRANA (Q5MD13) 30S ribosomal protein S10-like, partial (64%)	SGN-U268551
MICRO.14999.C1	0.634972	1.10466	0.79868	0.88058	0.624953	1.31134	0.89947	Group II	NP_176555	PDE316 (PIGMENT DEFECTIVE EMBRYO); ATP binding / ligase [Arabidopsis thaliana]	TC143657	similar to RF|NP_176555.1|15222509|NM_105045 PDE316 (PIGMENT DEFECTIVE EMBRYO); ATP binding {Arabidopsis thaliana} (exp=-1; wgp=0; cg=0), partial (38%)	SGN-U294114
MICRO.1498.C1	1.07446	1.34956	1.19757	1.20906	0.704473	0.548253	0.626307	Group V	CAC15504	B2-type cyclin dependent kinase [Solanum lycopersicum]	TC160867	UP|Q9FSH4_LYCES (Q9FSH4) B2-type cyclin dependent kinase, complete	SGN-U275390
MICRO.14976.C1	0.914282	0.528064	1.2179	1.9417	1.14166	1.57078	1.00991	Group VI	AAR06921	UDP-glycosyltransferase 89B2 [Stevia rebaudiana]	TC162066	weakly similar to UP|Q6VAA5_STERE (Q6VAA5) UDP-glycosyltransferase 89B2, partial (79%)	SGN-U273456
MICRO.14959.C1	0.554188	0.468338	1.08241	1.23761	0.978568	0.74219	1.51718	Group III	ABE80289	Sulphate transporter [Medicago truncatula]	TC159257	similar to GB|BAA21657.1|2285885|D89631 sulfate transporter {Arabidopsis thaliana} (exp=-1; wgp=0; cg=0), partial (44%)	SGN-U294824
MICRO.14952.C1	0.813906	0.456336	0.960479	0.687755	0.829273	0.408473	1.53243	Group IV	CAA69976	MtN3 [Medicago truncatula]	TC134410	similar to UP|P93332_MEDTR (P93332) MtN3 protein precursor, partial (69%)	SGN-U293895
MICRO.14944.C1	1.10674	0.65041	0.988895	0.277967	1.25914	1.11841	0.85254	Group I	NP_190485	pyruvate kinase [Arabidopsis thaliana]	TC159611	weakly similar to GB|CAB66395.1|6723386|ATF2K15 pyruvate kinase-like protein {Arabidopsis thaliana} (exp=0; wgp=1; cg=0), partial (3%)	SGN-U294286
MICRO.14936.C1	1.10061	1.06355	0.754797	0.717128	0.439883	0.207506	0.942056	Group V	NP_189233	transferase [Arabidopsis thaliana]	TC156933	weakly similar to UP|Q9FYM1_ARATH (Q9FYM1) F21J9.8, partial (20%)	SGN-U270017
MICRO.14933.C4	1.60805	1.37828	1.04064	3.04711	11.1051	0.655632	1.00837	Group VII	NA	NA	CV499811		SGN-U282003
MICRO.14933.C3	1.26929	0.974494	1.12917	1.5908	4.42967	1.07176	0.840163	Group VII	NP_173724	unknown protein [Arabidopsis thaliana]	TC135155		SGN-U282003
MICRO.14933.C1	1.09659	1.12906	1.08611	2.79405	14.7528	0.708336	0.941574	Group VII	ABE89195	hypothetical protein MtrDRAFT_AC146775g29v2 [Medicago truncatula]	TC144934		SGN-U282003
MICRO.14926.C1	1.22029	0.57973	1.00849	1.01934	2.65442	0.630943	1.1005	Group VII	NP_173229	unknown protein [Arabidopsis thaliana]	TC142336	similar to UP|Q9LMU1_ARATH (Q9LMU1) F2H15.10, partial (37%)	SGN-U293793
MICRO.14925.C1	0.519862	0.495095	1.09878	1.1517	2.45242	0.467897	1.18109	Group IV	BAE98423	hypothetical protein [Arabidopsis thaliana]	TC141326	similar to UP|Q9LMU1_ARATH (Q9LMU1) F2H15.10, partial (30%)	SGN-U291044
MICRO.149.C1	1.76904	0.786864	0.644682	0.534413	0.57481	1.57495	1.00567	Group II	BAA82306	peroxidase [Nicotiana tabacum]	TC135382	similar to UP|Q9XIV9_TOBAC (Q9XIV9) Peroxidase , partial (95%)	SGN-U279431
MICRO.14890.C1	0.937712	0.84592	1.13969	1.15048	1.57531	1.59193	1.14777	Group I	NP_565238	unknown protein [Arabidopsis thaliana]	TC146465	weakly similar to UP|Q6H8E0_ORYSA (Q6H8E0) Kelch repeat-containing F-box-like, partial (12%)	SGN-U298866
MICRO.14886.C1	0.570586	0.76543	0.867161	0.974447	0.477929	0.404589	0.728253	Group V	O48927	Cytochrome P450 78A3	TC134264	similar to RF|NP_182189.1|15226422|NM_130231 CYP78A6; heme binding {Arabidopsis thaliana} (exp=-1; wgp=0; cg=0), partial (40%)	SGN-U292021
MICRO.14874.C1	1.28193	0.997915	1.79587	1.36487	1.50767	2.84423	1.04864	Group I	ABN09189	cAMP response element binding (CREB) protein [Medicago truncatula]	TC155516	similar to UP|O22208_ARATH (O22208) BZIP family transcription factor, partial (10%)	SGN-U284614
MICRO.14860.C1	0.872934	0.891018	0.545736	0.333998	1.5778	1.17566	0.869643	Group I	AAC83688	101 kDa heat shock protein; HSP101 [Nicotiana tabacum]	TC139580	homologue to UP|Q9ZT13_TOBAC (Q9ZT13) 101 kDa heat shock protein, partial (38%)	SGN-U272923
MICRO.14853.C1	0.896534	1.15185	0.923753	0.625316	0.504158	2.7315	0.689272	Group II	CAC01706	putative protein [Arabidopsis thaliana]	TC139752	similar to RF|NP_186956.1|15228449|NM_111176 ATP binding {Arabidopsis thaliana} (exp=-1; wgp=0; cg=0), partial (40%)	SGN-U298121
MICRO.14819.C1	1.19321	1.19673	0.963851	0.746472	5.22265	7.56419	1.11396	Group I	NP_566303	unknown protein [Arabidopsis thaliana]	TC144497		SGN-U276180
MICRO.1481.C2	1.189	1.40675	1.06068	0.81999	0.602552	0.606217	0.939169	Group V	NP_172011	EMB2394; structural constituent of ribosome [Arabidopsis thaliana]	TC150254	similar to RF|NP_172011.1|15220443|NM_100397 EMB2394; structural constituent of ribosome {Arabidopsis thaliana} (exp=-1; wgp=0; cg=0), partial (86%)	SGN-U272909
MICRO.14800.C1	2.01578	0.510041	1.15023	0.724995	3.22428	1.55139	0.159159	Group I	ABA18635	inducible plastid-lipid associated protein [Solanum lycopersicum]	TC137598	similar to UP|Q9LTQ3_ARATH (Q9LTQ3) Similarity to protein translation inhibitor, partial (89%)	SGN-U276474
MICRO.14798.C1	1.21801	0.829959	1.72591	1.93869	1.27002	1.66777	0.9906	Group VI	NP_180566	nucleotide binding [Arabidopsis thaliana]	TC140799	similar to UP|Q2PYY1_SOLTU (Q2PYY1) Protein transport SEC13-like protein, partial (90%)	SGN-U271463
MICRO.14792.C1	1.38215	0.99741	1.67116	2.08584	1.01469	1.40255	1.23393	Group VI	AAK60564	armadillo repeat-containing protein [Nicotiana tabacum]	CK263588		SGN-U283478
MICRO.14789.C1	1.07943	0.93868	0.998205	0.969151	1.62591	1.90922	1.21297	Group I	NP_195487	DNA binding / transcription factor [Arabidopsis thaliana]	TC148129	weakly similar to UP|Q9T062_ARATH (Q9T062) BZIP transcription factor-like protein, partial (30%)	SGN-U293141
MICRO.14786.C1	0.530741	0.684836	1.02842	1.29268	1.01956	0.442479	1.13361	Group III	AAM63491	putative kinesin light chain [Arabidopsis thaliana]	TC135033	similar to GB|AAL91265.1|19699309|AY090361 AT4g10840/F25I24_50 {Arabidopsis thaliana} (exp=-1; wgp=0; cg=0), partial (36%)	SGN-U280409
MICRO.14780.C1	1.12574	0.658513	0.970457	0.664235	0.921211	0.733642	0.946128	Group IV	NP_173573	catalytic [Arabidopsis thaliana]	TC144261	weakly similar to UP|Q8LRT5_ARATH (Q8LRT5) Adenosine monophosphate binding protein 4 AMPBP4, partial (49%)	SGN-U278123
MICRO.14771.C1	0.996432	0.966912	1.30314	2.11651	1.11127	1.59484	0.749307	Group VI	AAX83875	teosinte glume architecture 1 [Zea mays]	TC135538	similar to UP|SPL13_ARATH (Q8LFW6) Squamosa promoter-binding-like protein 13, partial (25%)	SGN-U290164
MICRO.14770.C1	1.88623	0.874823	0.967361	0.978106	1.71972	0.830445	0.735934	Group I	NP_567583	unknown protein [Arabidopsis thaliana]	TC134254	similar to UP|Q94JM4_ARATH (Q94JM4) AT4g19390/T5K18_170, partial (60%)	SGN-U282369
MICRO.1477.C3	0.694438	0.774634	0.855356	0.618038	1.25598	0.484805	0.504192	Group IV	AAL92461	putative glucosyltransferase [Lycopersicon esculentum]	TC133347	weakly similar to UP|CZOG1_MAIZE (Q93XP7) Cis-zeatin O-glucosyltransferase 1 (cisZOG1) , partial (12%)	SGN-U269989
MICRO.14756.C2	0.585863	0.583218	1.00032	0.907161	1.03416	0.584842	0.928881	Group IV	AAA80495	endo-1,4-beta-glucanase precursor	TC143895	UP|Q42875_LYCES (Q42875) Endo-1,4-beta-glucanase precursor , partial (42%)	SGN-U281923
MICRO.1475.C1	0.73722	0.963286	1.01929	0.648256	0.473518	2.28731	0.946175	Group II	NP_566018	unknown protein [Arabidopsis thaliana]	TC148220	similar to UP|O64885_ARATH (O64885) Expressed protein (At2g44510/F4I1.32), partial (56%)	SGN-U278530
MICRO.14722.C1	0.798602	0.517967	1.12821	1.14482	1.2842	0.518326	0.955608	Group IV	BAE71207	hypothetical protein [Trifolium pratense]	TC146901	similar to UP|Q3E7H8_ARATH (Q3E7H8) Protein At1g18470, partial (49%)	SGN-U295646
MICRO.14695.C1	1.08176	0.899263	0.940684	0.921076	1.64633	1.82158	1.26086	Group I	NP_199199	ATCLH2 [Arabidopsis thaliana]	TC138832	similar to UP|Q8GTM4_BRAOL (Q8GTM4) Chlorophyllase 1 , partial (22%)	SGN-U286126
MICRO.14687.C1	1.52626	0.775519	0.996011	0.550787	0.655058	0.316149	1.56653	Group IV	NP_187896	oxidoreductase, acting on paired donors, with incorporation or reduction of molecular oxygen, 2-oxoglutarate as one donor, and incorporation of one atom each of oxygen into both donors [Arabidopsis thaliana]	TC155131	weakly similar to GB|AAR92264.1|40823177|BT011228 At1g55290 {Arabidopsis thaliana} (exp=-1; wgp=0; cg=0), partial (46%)	SGN-U276693
MICRO.14683.C1	1.1791	0.817351	0.873241	0.351286	0.915398	0.416442	0.96761	Group IV	BAB64937	TdcA1-ORF1-ORF2 [Daucus carota]	TC161451	similar to UP|Q39VV3_GEOMG (Q39VV3) Sec-independent periplasmic protein translocase, partial (6%)	SGN-U297864
MICRO.14654.C1	1.01143	0.748146	0.86427	0.61135	1.42665	0.623329	1.09532	Group IV	P09189	Heat shock cognate 70 kDa protein	TC136820	homologue to GB|CAA31663.1|20559|PHHSP70R hsp70 (AA 6 - 651) {Petunia x hybrida} (exp=-1; wgp=0; cg=0), partial (65%)	SGN-U269677
MICRO.14651.C2	1.04004	0.883397	0.880343	0.591938	0.493142	2.70854	0.956549	Group II	NA	NA	TC151835	similar to UP|Q6K999_ORYSA (Q6K999) Cticosapeptide/Phox/Bem1p (PB1) domain-containing protein-like, partial (12%)	SGN-U297127
MICRO.14630.C1	1.57322	0.929434	0.649965	0.752799	3.36491	0.565394	0.231071	Group I	XP_001351175	hypothetical protein MAL3P3.18 [Plasmodium falciparum 3D7]	CK258661	weakly similar to UP|Q7Y087 (Q7Y087) GBR5, partial (38%)	SGN-U273282
MICRO.14544.C1	0.613198	0.856092	1.03304	1.09225	1.09214	0.416711	0.968917	Group III	NP_200704	unknown protein [Arabidopsis thaliana]	TC142775	similar to UP|Q9FIL5_ARATH (Q9FIL5) Gb|AAB82637.1 (Gravitropic in the light 1) (At5g58960/k19m22_160), partial (21%)	SGN-U292424
MICRO.14543.C1	0.601743	1.13111	1.0331	0.679987	0.38488	2.06998	0.886204	Group II	ABF59210	unknown protein [Arabidopsis thaliana]	TC150235	weakly similar to UP|Q3EBX9_ARATH (Q3EBX9) Protein At2g20585, partial (29%)	SGN-U294043
MICRO.14539.C1	1.36529	0.791004	1.89692	1.81444	1.03371	1.16531	0.979849	Group VI	ABE91133	Blood group Rhesus C/E and D polypeptide; Rh-like protein/ammonium transporter [Medicago truncatula]	TC133509	similar to UP|Q8H251_MEDTR (Q8H251) Amt2-like protein, partial (93%)	SGN-U283954
MICRO.14505.C1	1.19086	0.917403	1.52851	0.998782	1.86826	3.04435	0.847075	Group I	NP_178116	protein transporter [Arabidopsis thaliana]	TC157332	weakly similar to RF|NP_175645.1|15218215|NM_104114 protein transporter {Arabidopsis thaliana} (exp=-1; wgp=0; cg=0), partial (28%)	SGN-U290596
MICRO.14494.C1	0.478076	0.614565	1.12467	1.38886	0.836997	0.910455	0.9846	Group III	NP_195312	unknown protein [Arabidopsis thaliana]	TC135234	similar to GB|AAL90913.1|19699093|AY090251 AT4g35870/F4B14_140 {Arabidopsis thaliana} (exp=-1; wgp=0; cg=0), partial (28%)	SGN-U288896
MICRO.14475.C1	0.662002	0.909165	0.978444	0.937234	1.00565	0.452821	0.982115	Group III	AAU93516	chloroplast alpha-glucan water dikinase isoform 3 [Arabidopsis thaliana]	TC157491	similar to UP|Q5XMK9_ARATH (Q5XMK9) Chloroplast alpha-glucan water dikinase isoform 3, partial (21%)	SGN-U275389
MICRO.14463.C1	0.400651	0.880667	1.0164	0.989585	0.419462	1.20934	0.98316	Group III	NP_178812	ATP binding / DNA binding / DNA-dependent ATPase [Arabidopsis thaliana]	TC134772	similar to RF|NP_178812.1|15226146|NM_126771 ATP binding {Arabidopsis thaliana} (exp=-1; wgp=0; cg=0), partial (37%)	SGN-U292879
MICRO.1443.C2	1.43968	0.958395	1.27019	0.937909	1.09376	5.22405	1.97958	Group I	NP_171913	EIF2 GAMMA; translation factor, nucleic acid binding [Arabidopsis thaliana]	TC135387	similar to RF|NP_171913.1|15219669|NM_100298 EIF2 GAMMA; translation factor, nucleic acid binding {Arabidopsis thaliana} (exp=-1; wgp=0; cg=0), partial (38%)	SGN-U295055
MICRO.1441.C1	0.856291	1.03691	0.926123	0.655993	0.559203	1.12814	0.963862	Group II	AAS67373	CONSTANS interacting protein 5 [Lycopersicon esculentum]	TC148942	homologue to UP|Q2VY14_LYCES (Q2VY14) CONSTANS interacting protein 5 (Fragment), partial (34%)	SGN-U276971
MICRO.14356.C1	1.10671	0.893949	1.74528	2.041	1.05524	2.8946	0.983835	Group VI	ABO79264	Calmodulin binding protein-like [Medicago truncatula]	TC134294	weakly similar to UP|Q9FKL6_ARATH (Q9FKL6) Calmodulin-binding protein, partial (24%)	SGN-U282630
MICRO.14351.C2	0.312142	1.0667	0.991134	1.55636	1.29048	1.07224	1.6699	Group III	NA	NA	TC153033	similar to UP|Q2Q0V7_CUCPE (Q2Q0V7) Patellin 1, partial (10%)	SGN-U285584
MICRO.14296.C1	0.630739	0.56599	0.868926	0.918332	0.976156	0.813905	0.931919	Group III	AAM63152	unknown [Arabidopsis thaliana]	TC133415	similar to GB|AAQ65179.1|34365735|BT010556 At3g10960 {Arabidopsis thaliana} (exp=-1; wgp=0; cg=0), partial (48%)	SGN-U296177
MICRO.14288.C1	0.80357	1.23358	0.919802	1.00038	0.578214	0.632995	0.992761	Group V	BAA11766	high mobility group protein [Canavalia gladiata]	TC161058	similar to UP|Q42461_CANGL (Q42461) High mobility group protein, partial (61%)	SGN-U272383
MICRO.14241.C1	0.557139	0.60262	1.61825	1.48583	1.24604	1.75659	0.878638	Group VI	ABK96798	ethylene response factor 3 [Solanum tuberosum]	TC156389	similar to UP|Q84XB1_LYCES (Q84XB1) Ethylene response factor 3, complete	SGN-U278906
MICRO.14161.C1	0.598128	0.670232	1.05329	1.40736	0.950139	0.45894	0.846691	Group IV	NP_176242	polygalacturonase [Arabidopsis thaliana]	TC133319	weakly similar to RF|XP_507215.1|51964862|XM_507215 P0709D11.28 gene product {Oryza sativa (japonica cultivar-group)} (exp=-1; wgp=0; cg=0), partial (16%)	SGN-U294686
MICRO.14151.C3	1.13101	0.823102	1.87196	1.65375	1.13529	1.90725	1.11331	Group VI	ABL61268	putative zinc transporter [Solanum lycopersicum]	TC133312	similar to UP|Q6VM15_MEDTR (Q6VM15) Metal transport protein, partial (67%)	SGN-U293795
MICRO.14151.C1	1.22648	0.831824	1.73012	1.71202	1.04399	1.7061	1.21575	Group VI	ABL61268	putative zinc transporter [Solanum lycopersicum]	TC133838	similar to UP|Q852F6_ORYSA (Q852F6) Zinc transporter, partial (62%)	SGN-U293795
MICRO.1414.C1	0.621806	0.445205	1.00732	0.913772	0.969237	0.483432	0.917262	Group IV	AAA80495	endo-1,4-beta-glucanase precursor	TC143048	homologue to UP|Q42875_LYCES (Q42875) Endo-1,4-beta-glucanase precursor , partial (56%)	SGN-U277743
MICRO.14113.C1	0.609403	0.724604	0.783167	0.893489	0.54897	0.607512	1.33656	Group III	NP_196051	pectate lyase [Arabidopsis thaliana]	TC141744	similar to UP|Q6U6I9_BRANA (Q6U6I9) Pectate lyase-like protein, partial (68%)	SGN-U293551
MICRO.1405.C1	1.49201	0.580382	1.04108	0.762094	0.920418	0.933468	0.587369	Group V	NP_181250	peroxidase [Arabidopsis thaliana]	TC134088	similar to UP|PER21_ARATH (Q42580) Peroxidase 21 precursor (Atperox P21) (PRXR5) (ATP2a/ATP2b) , partial (91%)	SGN-U279829
MICRO.13975.C2	1.50956	0.967693	0.933562	0.911249	0.955491	2.09137	1.20525	Group I	NP_564254	unknown protein [Arabidopsis thaliana]	TC134944	similar to UP|Q93WN1_ARATH (Q93WN1) At1g26660/T24P13_4, partial (81%)	SGN-U280382
MICRO.1397.C2	0.785935	1.10104	1.19098	0.452075	0.551173	4.6768	1.04976	Group II	ABB55369	histone deacetylase 2a-like [Solanum tuberosum]	TC155339	UP|Q2XTE1_SOLTU (Q2XTE1) Histone deacetylase 2a-like, partial (48%)	SGN-U269209
MICRO.1397.C1	0.927993	1.03759	1.07531	0.659403	0.57974	1.69072	0.855331	Group II	Q6V9I6	Histone deacetylase 2a (HD2a) (ScHD2a)	TC136499	homologue to UP|HD2A_SOLCH (Q6V9I6) Histone deacetylase 2a (HD2a) (ScHD2a), partial (78%)	SGN-U269209
MICRO.13962.C2	1.1367	0.871637	2.32984	1.22827	1.41816	3.43825	1.13261	Group I	Q03662	Probable glutathione S-transferase (Auxin-induced protein PGNT1/PCNT110)	DN589366		SGN-U278133
MICRO.13949.C1	2.12689	0.692195	0.556343	1.33801	0.519928	1.00687	1.47527	Group VIII	CAI38795	thaumatin-like protein [Actinidia deliciosa]	TC159764	similar to UP|Q5ND92_ACTDE (Q5ND92) Thaumatin-like protein, partial (80%)	SGN-U283571
MICRO.13929.C1	1.25677	0.76959	1.52361	0.599813	1.88539	4.12766	0.292976	Group I	AAL51055	beta-carbonic anhydrase [Nicotiana tabacum]	TC152498	similar to UP|Q8W183_TOBAC (Q8W183) Beta-carbonic anhydrase , partial (60%)	SGN-U269416
MICRO.13921.C1	1.11269	0.848206	0.91664	0.845062	1.61237	2.12424	1.3624	Group I	ABO84662	Glyoxalase/bleomycin resistance protein/dioxygenase [Medicago truncatula]	TC160715	weakly similar to UP|Q941C8_ARATH (Q941C8) At2g28420/T1B3.6, partial (45%)	SGN-U277237
MICRO.13920.C2	0.973309	0.798419	2.08186	2.01042	0.899608	1.20473	1.14518	Group VI	AAO22065	NtPRp27-like protein [Solanum tuberosum]	DN587881		SGN-U272133
MICRO.13920.C1	1.22257	0.957178	2.02502	2.49529	0.696105	0.921963	1.00072	Group VI	AAO22065	NtPRp27-like protein [Solanum tuberosum]	TC139656	UP|Q84XQ4_SOLTU (Q84XQ4) NtPRp27-like protein, complete	SGN-U272133
MICRO.13916.C1	1.62035	0.565778	1.71482	1.35471	1.48308	3.22561	0.855466	Group I	ABE82272	UDP-glucuronosyl/UDP-glucosyltransferase [Medicago truncatula]	TC156008	similar to UP|Q2V6J9_FRAAN (Q2V6J9) UDP-glucose glucosyltransferase, partial (33%)	SGN-U285048
MICRO.13910.C1	1.02119	0.816589	1.21367	1.25136	1.59871	1.61296	0.926894	Group I	NA	NA	TC141963		SGN-U278639
MICRO.13904.C1	1.53404	0.942506	0.95951	1.2558	1.61285	0.444473	0.808567	Group V	CAA55812	Sn-1 [Capsicum annuum]	TC150281	weakly similar to UP|Q42393_CAPAN (Q42393) Sn-1 protein, partial (52%)	SGN-U279082
MICRO.139.C3	1.54973	1.21559	1.41322	1.61051	1.06357	1.57476	0.913062	Group VI	AAF64453	putative heat-shock protein 90 [Euphorbia esula]	TC148117	similar to UP|ENPL_CATRO (P35016) Endoplasmin homolog precursor (GRP94 homolog), partial (37%)	SGN-U269047
MICRO.13895.C1	0.421255	1.09401	0.754652	0.809311	0.419193	1.2173	1.01554	Group II	BAC42455	unknown protein [Arabidopsis thaliana]	TC134035		SGN-U278566
MICRO.1389.C3	1.37947	1.06861	1.89349	1.85719	1.37418	1.5231	0.952224	Group VI	AAT84084	enhanced disease susceptibility 1 protein [Solanum tuberosum]	TC161398	UP|Q2TQV0_SOLTU (Q2TQV0) Enhanced disease susceptibility 1 protein, partial (33%)	SGN-U268976
MICRO.1389.C1	1.06504	0.930557	2.57605	3.01142	1.26512	1.59367	1.01277	Group VI	AAT84084	enhanced disease susceptibility 1 protein [Solanum tuberosum]	TC140235	homologue to UP|Q2TQV0_SOLTU (Q2TQV0) Enhanced disease susceptibility 1 protein, complete	SGN-U268976
MICRO.13883.C1	1.04587	0.679797	1.13769	1.15531	2.51485	1.35382	1.71084	Group IV	ABA46786	unknown [Solanum tuberosum]	TC139569	similar to UP|Q84MB6_ARATH (Q84MB6) At3g50210, partial (94%)	SGN-U279773
MICRO.13880.C2	1.07787	1.08509	0.989439	0.656823	0.661188	2.23123	0.974866	Group II	NP_198917	DNA binding / DNA-directed RNA polymerase [Arabidopsis thaliana]	TC155585	homologue to GB|AAM67289.1|21618239|AY084743 DNA directed RNA polymerase II polypeptide K {Arabidopsis thaliana} (exp=-1; wgp=0; cg=0), partial (90%)	SGN-U271414
MICRO.13871.C1	0.523132	0.942021	1.92115	1.8711	1.21366	1.15949	1.2613	Group VI	BAD15107	hypothetical protein [Nicotiana tabacum]	TC156334	weakly similar to UP|O89908_BYV (O89908) 65-kDa protein, partial (3%)	SGN-U293590
MICRO.13866.C1	1.64768	1.1898	0.842382	1.33939	1.38906	2.06667	0.989621	Group I	NA	NA	TC161910	homologue to UP|Q3IQV4_NATPD (Q3IQV4) ABC-type transport system permease protein 2, partial (5%)	SGN-U283910
MICRO.13832.C1	0.791508	0.658284	1.38906	1.86472	1.16008	1.52724	0.97942	Group VI	NP_851109	LHT1; amino acid permease [Arabidopsis thaliana]	TC159232	similar to RF|XP_507109.1|51964650|XM_507109 OJ1163_G08.25 gene product {Oryza sativa (japonica cultivar-group)} (exp=-1; wgp=0; cg=0), partial (59%)	SGN-U284790
MICRO.13823.C2	0.803369	0.783244	1.25392	1.06361	0.957198	2.48506	1.57002	Group VI	AAK84008	beta-amylase PCT-BMYI [Solanum tuberosum]	CK268423		SGN-U278074
MICRO.13793.C1	0.971404	1.62108	0.838149	1.2914	1.28295	2.14742	0.773102	Group I	BAB02389	glucan synthase-like protein [Arabidopsis thaliana]	TC139491	similar to UP|Q9LUD7_ARATH (Q9LUD7) Glucan synthase-like protein, partial (8%)	SGN-U285953
MICRO.13786.C1	1.05805	1.02703	0.875178	0.631092	0.58777	1.35335	0.950119	Group II	NA	NA	TC155666		SGN-U281905
MICRO.1378.C1	0.602098	0.369366	1.37883	0.845537	1.01794	1.36708	1.03981	Group III	AAM47580	putative ABC-transporter-like protein [Sorghum bicolor]	TC155188	similar to GB|AAG45492.1|12061244|AY013245 36I5.4 {Oryza sativa (japonica cultivar-group)} (exp=0; wgp=1; cg=0), partial (38%)	SGN-U272654
MICRO.13778.C2	1.50035	0.87107	2.14696	2.46709	0.95065	0.968481	1.35995	Group VI	NP_188039	EMB1474; carboxylic ester hydrolase/ hydrolase, acting on ester bonds [Arabidopsis thaliana]	TC149003	similar to UP|Q9FLN0_ARATH (Q9FLN0) GDSL-motif lipase/hydrolase-like protein, partial (37%)	SGN-U282154
MICRO.13778.C1	1.03297	0.917919	1.76486	1.87805	1.04309	0.794901	1.05744	Group VI	ABO83318	Lipolytic enzyme, G-D-S-L [Medicago truncatula]	TC149003	similar to UP|Q9FLN0_ARATH (Q9FLN0) GDSL-motif lipase/hydrolase-like protein, partial (37%)	SGN-U282154
MICRO.13763.C2	1.1656	1.01604	1.25815	1.52863	1.74873	1.08417	1.07477	Group VII	NP_177363	ATP binding / kinase/ protein serine/threonine kinase [Arabidopsis thaliana]	TC161051	similar to RF|NP_177363.1|15218385|NM_105877 ATP binding {Arabidopsis thaliana} (exp=-1; wgp=0; cg=0), partial (13%)	SGN-U285799
MICRO.13718.C1	1.39543	0.462563	1.48993	0.398132	1.0236	3.10822	0.596001	Group I	AAM13860	unknown protein [Arabidopsis thaliana]	TC153917		SGN-U281185
MICRO.13715.C1	1.49199	0.579221	1.1066	1.30494	2.40888	2.87563	1.254	Group I	NA	NA	TC149361		SGN-U285605
MICRO.13675.C1	0.926441	1.36651	1.14223	1.151	0.635468	0.509033	0.667085	Group V	NP_198646	unknown protein [Arabidopsis thaliana]	TC136007	similar to UP|Q9FZH8_ARATH (Q9FZH8) F1O19.9 protein, partial (23%)	SGN-U277509
MICRO.13674.C1	1.82213	0.862968	1.69768	0.240711	1.42109	0.706275	1.63765	Group IV	ABH07900	auxin repressed/dormancy associated protein [Lycopersicon esculentum]	TC142547	similar to UP|Q40425_NICSY (Q40425) RNA-binding gricine-rich protein-1 (RGP-1c), partial (96%)	SGN-U281234
MICRO.13669.C1	0.59864	0.815335	1.22564	1.62087	14.0505	2.00907	0.966579	Group VII	BAD87399	glycogen (starch) synthase-like [Oryza sativa (japonica cultivar-group)]	TC142793	similar to UP|O64927_CHLRE (O64927) Soluble starch synthase , partial (9%)	SGN-U281070
MICRO.13663.C1	0.541741	0.624038	0.942909	1.30179	1.17578	0.887981	0.925273	Group III	AAO13689	amino acid transporter [Lycopersicon esculentum]	TC160574	homologue to UP|Q8GZV3_LYCES (Q8GZV3) Amino acid transporter, complete	SGN-U276046
MICRO.13654.C1	1.53897	0.720285	1.09182	0.875951	0.770396	1.7206	0.950817	Group I	NP_565417	auxin:hydrogen symporter [Arabidopsis thaliana]	TC148591	similar to UP|Q9SHL8_ARATH (Q9SHL8) Expressed protein, partial (39%)	SGN-U288828
MICRO.1365.C1	1.29811	0.938264	1.00442	1.6372	3.58198	0.608017	0.915576	Group VII	CAA12415	magnesium dependent soluble inorganic pyrophosphatase [Solanum tuberosum]	TC141448	homologue to UP|O49949_SOLTU (O49949) Magnesium dependent soluble inorganic pyrophosphatase, partial (98%)	SGN-U272938
MICRO.13647.C1	0.916614	1.09595	1.0286	0.632802	0.638565	2.42427	0.955542	Group II	NA	NA	TC149875	UP|Q9RFI6_STRPY (Q9RFI6) Serum opacity factor precursor (Fragment), partial (5%)	SGN-U286478
MICRO.13633.C2	0.939742	1.17094	0.957269	0.64865	0.559912	1.40894	0.951171	Group II	NA	NA	TC142449	similar to UP|RS8_MAIZE (Q08069) 40S ribosomal protein S8, partial (83%)	SGN-U268673
MICRO.1363.C1	0.741936	1.19905	0.962677	1.00463	0.657866	0.986405	0.554343	Group V	BAE71208	hypothetical protein [Trifolium pratense]	TC133542	similar to GB|AAB60729.1|2160166|F21M12 {Arabidopsis thaliana} (exp=0; wgp=1; cg=0), partial (50%)	SGN-U270604
MICRO.13628.C1	1.57437	0.811072	1.21806	1.00795	0.739109	7.54786	0.840328	Group I	NP_188964	DNA binding / transcription factor [Arabidopsis thaliana]	TC157874	similar to UP|ERF14_ARATH (P93822) Ethylene-responsive transcription factor 14 (Ethylene-responsive element-binding factor 14) (EREBP-14) (AtERF14), partial (55%)	SGN-U279486
MICRO.13606.C1	1.38509	0.812999	1.38501	2.63812	1.12933	2.31593	1.08888	Group VI	AAF98368	patatin-like protein 1 [Nicotiana tabacum]	TC143845	weakly similar to UP|Q9FZ09_TOBAC (Q9FZ09) Patatin-like protein 1, partial (43%)	SGN-U270461
MICRO.13599.C1	0.377631	0.508463	1.29939	1.30394	1.11194	1.29556	1.06156	Group III	ABE78851	LysM domain-containing receptor-like kinase 7-related [Medicago truncatula]	TC136050	weakly similar to UP|Q6ZD33_ORYSA (Q6ZD33) Receptor protein kinase PERK1-like protein, partial (13%)	SGN-U285446
MICRO.13596.C1	1.13601	0.705445	2.15255	1.50191	1.36156	2.56839	0.55803	Group VI	BAB16429	NtEIG-A1 [Nicotiana tabacum]	CV504952		SGN-U274162
MICRO.13583.C1	1.05087	0.51925	0.923123	1.42338	1.5997	0.233115	1.89428	Group IV	ABK27327	vacuolar citrate/H+ symporter [Citrus sinensis]	TC141244	similar to UP|TDT_ARATH (Q8LG88) Tonoplast dicarboxylate transporter (AttDT) (Vacuolar malate transporter) (Sodium-dicarboxylate cotransporter-like) (AtSDAT), partial (82%)	SGN-U289872
MICRO.13580.C1	2.02352	0.778611	1.11619	1.6115	1.83325	1.92708	0.864263	Group I	NA	NA	TC138713		SGN-U294581
MICRO.13509.C1	1.00682	1.08733	0.963079	1.21249	0.37773	0.543937	1.02496	Group V	AAQ08180	TK1-like deoxyribonucleoside kinase [Lycopersicon esculentum]	TC139097	homologue to UP|Q71F77_LYCES (Q71F77) TK1-like deoxyribonucleoside kinase , complete	SGN-U278684
MICRO.135.C1	1.20033	1.0349	1.78364	1.57078	0.609366	2.22602	1.48341	Group VI	AAR12195	molecular chaperone Hsp90-1 [Lycopersicon esculentum]	TC148107	homologue to UP|Q6R0J1_TOBAC (Q6R0J1) Heat shock protein 90, partial (48%)	SGN-U268222
MICRO.13453.C1	1.18417	0.657134	0.951267	1.25841	1.09852	0.645599	1.20063	Group IV	AAX20048	CPRD49-like protein [Capsicum annuum]	TC141998	similar to UP|Q2VT52_CAPAN (Q2VT52) CPRD49-like protein, partial (51%)	SGN-U275074
MICRO.1345.C3	1.1206	0.887124	0.918477	0.643052	1.10383	0.6266	0.666734	Group IV	NA	NA	TC159086	similar to UP|Q4RGZ5_TETNG (Q4RGZ5) Chromosome undetermined SCAF15081, whole genome shotgun sequence, partial (4%)	SGN-U287643
MICRO.1345.C1	1.12497	0.974942	0.76979	0.605024	1.30859	0.494406	0.553817	Group IV	AAK11565	ent-kaurenoic acid hydroxylase [Arabidopsis thaliana]	TC155233	similar to UP|Q84ZW1_PEA (Q84ZW1) Ent-kaurenoic acid oxidase, partial (12%)	SGN-U269971
MICRO.13449.C1	1.10665	0.743142	1.20754	1.31013	1.6827	2.49727	1.02314	Group I	NP_199378	peptidase/ subtilase [Arabidopsis thaliana]	TC155794	similar to RF|NP_199378.1|15242456|NM_123933 peptidase/ subtilase {Arabidopsis thaliana} (exp=-1; wgp=0; cg=0), partial (12%)	SGN-U280851
MICRO.13447.C1	0.617877	0.491771	1.14795	1.2365	1.37323	1.21736	0.791545	Group III	NP_850064	unknown protein [Arabidopsis thaliana]	TC145273	similar to GB|AAM15100.1|20197506|AC006053 Expressed protein {Arabidopsis thaliana} (exp=0; wgp=1; cg=0), partial (22%)	SGN-U273572
MICRO.13440.C1	0.998466	0.92587	0.94723	1.24638	1.66481	1.80978	0.742639	Group I	CAH59431	glutaredoxin 1 [Plantago major]	TC144670	weakly similar to RF|NP_172168.1|15222209|NM_100560 electron transporter/ thiol-disulfide exchange intermediate {Arabidopsis thaliana} (exp=-1; wgp=0; cg=0), partial (93%)	SGN-U273626
MICRO.1341.C2	1.16034	0.605405	1.35658	1.46299	1.83316	0.665171	0.819568	Group VII	ABB02637	ER lumen retaining receptor family-like protein [Solanum tuberosum]	TC135780	UP|Q38JH5_SOLTU (Q38JH5) ER lumen retaining receptor family-like protein, complete	SGN-U270009
MICRO.13374.C2	1.58403	0.789134	1.07198	1.02157	1.01776	1.61885	0.95285	Group I	NP_564413	peptidase/ subtilase [Arabidopsis thaliana]	TC139308	weakly similar to RF|NP_174573.1|15223351|NM_103030 peptidase/ subtilase {Arabidopsis thaliana} (exp=-1; wgp=0; cg=0), partial (34%)	SGN-U276780
MICRO.1336.C3	0.746723	0.910795	0.955436	0.871398	0.639195	0.501269	0.928439	Group V	NP_189221	RPL15 [Arabidopsis thaliana]	TC151701	similar to UP|RK15_ARATH (P25873) 50S ribosomal protein L15, chloroplast precursor (CL15), partial (69%)	SGN-U270773
MICRO.13349.C1	1.25209	1.23917	0.863032	0.538376	0.366281	3.02722	0.814185	Group II	NA	NA	TC150518		SGN-U274449
MICRO.13346.C1	1.54272	1.22366	1.70921	1.44	0.803853	1.0719	1.05372	Group VI	NP_174170	electron transporter/ thiol-disulfide exchange intermediate [Arabidopsis thaliana]	TC152510	similar to UP|Q9SGP6_ARATH (Q9SGP6) F3M18.8 (At1g28480), partial (69%)	SGN-U279817
MICRO.13345.C1	1.55561	0.868472	10.228	5.40655	0.738824	0.869453	1.64035	Group VI	ABJ98930	NIMIN2c protein [Nicotiana tabacum]	TC147565	similar to UP|Q5EN53_ORYSA (Q5EN53) NPR1 interactor, partial (11%)	SGN-U280933
MICRO.13338.C1	1.52353	0.878352	1.16326	0.942381	1.18624	1.57206	1.05537	Group I	ABE91529	Protein of unknown function DUF231, plant [Medicago truncatula]	TC151969		SGN-U280623
MICRO.13330.C1	1.00253	0.873414	2.03153	0.594915	1.54816	0.971616	0.854418	Group IV	NA	NA	TC161190	weakly similar to UP|Q9SBM1_VOLCA (Q9SBM1) Hydroxyproline-rich glycoprotein DZ-HRGP precursor, partial (13%)	SGN-U279747
MICRO.13320.C1	1.36046	0.985629	2.21315	3.75859	0.817314	1.37964	0.917028	Group VI	NA	NA	TC160712		SGN-U281775
MICRO.13306.C1	1.51518	1.13889	1.73689	0.961479	0.744781	2.9012	0.636994	Group I	AAD30548	iron-regulated transporter 1 [Lycopersicon esculentum]	TC160453	UP|Q9XFB2_LYCES (Q9XFB2) Iron-regulated transporter 1, partial (12%)	SGN-U282807
MICRO.13285.C2	0.563654	0.799105	0.914394	0.751663	0.581414	2.82307	1.00426	Group II	BAC99390	putative U3 snoRNP protein IMP4 [Oryza sativa (japonica cultivar-group)]	TC138680	similar to RF|NP_176564.1|15222534|NM_105054 IMP4 {Arabidopsis thaliana} (exp=-1; wgp=0; cg=0), partial (94%)	SGN-U273108
MICRO.13277.C1	1.54669	0.894605	0.960659	0.570257	1.33864	0.732837	0.633421	Group IV	AAM09517	putative glucosyltransferase [Phaseolus lunatus]	TC161519	similar to UP|ZOG_PHALU (Q9ZSK5) Zeatin O-glucosyltransferase (Trans-zeatin O-beta-D-glucosyltransferase) , partial (17%)	SGN-U275540
MICRO.13271.C1	0.431628	0.905548	1.10224	1.27853	1.27855	2.18561	0.559829	Group III	BAB86896	syringolide-induced protein 13-1-1 [Glycine max]	BQ508658	similar to UP|Q84QD5 (Q84QD5) Avr9/Cf-9 rapidly elicited protein 74, partial (30%)	SGN-U294428
MICRO.13245.C1	0.573534	1.04776	1.08186	1.03475	0.653713	0.945254	1.64757	Group III	BAE99814	hypothetical protein [Arabidopsis thaliana]	TC141465	similar to UP|Q501D5_ARATH (Q501D5) At2g40550, partial (18%)	SGN-U283665
MICRO.13186.C1	0.686236	0.999663	1.13866	0.615416	0.62171	1.07695	1.14813	Group III	ABO84378	Tetratricopeptide-like helical [Medicago truncatula]	TC140499	weakly similar to UP|Q9FFG8_ARATH (Q9FFG8) Selenium-binding protein-like, partial (32%)	SGN-U283006
MICRO.13171.C2	0.873279	1.21494	1.05555	0.930288	0.551153	5.51513	0.59323	Group II	ABC26876	putative nuclear GTPase [Solanum lycopersicum]	TC153990	similar to RF|NP_187361.1|15231373|NM_111585 GTP binding {Arabidopsis thaliana} (exp=-1; wgp=0; cg=0), partial (76%)	SGN-U288209
MICRO.13165.C1	1.3544	1.04227	1.21288	1.75135	1.20613	8.74601	0.622395	Group I	AAR92477	putative WRKY transcription factor 30 [Vitis aestivalis]	TC154887	similar to RF|NP_849358.1|30681651|NM_179027 WRKY41; transcription factor {Arabidopsis thaliana} (exp=-1; wgp=0; cg=0), partial (30%)	SGN-U280345
MICRO.13157.C1	1.0525	1.1852	0.82115	0.581734	0.522772	1.14932	0.932351	Group II	NP_564582	unknown protein [Arabidopsis thaliana]	TC149856		SGN-U279315
MICRO.13148.C1	0.495044	0.593776	1.30284	0.891277	0.486721	0.815871	1.03523	Group III	AAS46244	xyloglucan endotransglucosylase-hydrolase XTH9 [Lycopersicon esculentum]	TC155985	homologue to UP|Q6RHX7_LYCES (Q6RHX7) Xyloglucan endotransglucosylase-hydrolase XTH9, partial (34%)	SGN-U279155
MICRO.13119.C1	1.51527	1.32506	2.9539	3.2577	1.27997	2.27386	1.15075	Group VI	ABE89190	Protein kinase [Medicago truncatula]	TC154081	weakly similar to UP|P93604_WHEAT (P93604) Rust resistance kinase Lr10, partial (14%)	SGN-U280721
MICRO.1310.C1	0.544217	0.603865	0.82877	1.26115	1.0574	1.32877	1.10579	Group III	ABC69384	CYP98A33v1 [Nicotiana tabacum]	TC134994	similar to UP|Q5QIB0_CAMAC (Q5QIB0) Hydroxylase-like cytochrome P450 CASS, partial (97%)	SGN-U278244
MICRO.13083.C1	0.884492	0.761497	2.16733	1.86546	0.995436	1.5093	1.27924	Group VI	CAC40826	HcrVf2 protein [Malus floribunda]	TC139646	weakly similar to RF|NP_181039.1|15226862|NM_129046 protein binding {Arabidopsis thaliana} (exp=-1; wgp=0; cg=0), partial (5%)	SGN-U295476
MICRO.13072.C1	1.14062	3.06603	0.92008	29.8025	2.09451	0.310986	1.16742	Group VIII	NA	NA	TC153809	similar to UP|Q5XG37_XENLA (Q5XG37) LOC495222 protein, partial (5%)	SGN-U268552
MICRO.13041.C1	0.383944	1.22455	1.02064	1.55526	2.05326	0.658284	1.22745	Group III	YP_514837	ATP synthase CF1 alpha chain [Solanum lycopersicum]	TC132825	ATP synthase CF1 alpha subunit [Solanum tuberosum]	SGN-U293251
MICRO.13031.C1	0.718547	1.22738	1.01738	0.939085	1.06122	0.299326	0.651271	Group V	ABE77793	E-class P450, group I [Medicago truncatula]	TC148912	similar to RF|NP_177101.2|42563074|NM_105609 metal ion binding {Arabidopsis thaliana} (exp=-1; wgp=0; cg=0), partial (4%)	SGN-U282480
MICRO.13030.C1	0.932602	0.987022	0.980877	0.597092	0.610316	2.95983	1.12644	Group II	NP_191971	catalytic [Arabidopsis thaliana]	TC135577	similar to GB|AAC13627.1|3047116|F6N23 {Arabidopsis thaliana} (exp=0; wgp=1; cg=0), partial (80%)	SGN-U271606
MICRO.13024.C1	0.866177	0.749863	1.70537	1.70689	1.33827	2.08395	0.858806	Group VI	NP_175079	aspartic-type endopeptidase/ pepsin A [Arabidopsis thaliana]	TC144650	weakly similar to RF|NP_175079.1|15219354|NM_103539 aspartic-type endopeptidase/ pepsin A {Arabidopsis thaliana} (exp=-1; wgp=0; cg=0), partial (58%)	SGN-U282531
MICRO.12976.C1	1.19704	1.27536	0.914134	0.648855	0.577982	1.47748	1.03391	Group II	NP_001049099	Os03g0169400 [Oryza sativa (japonica cultivar-group)]	TC145844	similar to RF|NP_683305.1|22329550|NM_148464 structural constituent of ribosome {Arabidopsis thaliana} (exp=-1; wgp=0; cg=0), partial (47%)	SGN-U279477
MICRO.12930.C1	0.655678	0.598008	0.938093	1.18654	1.25611	1.20069	1.1077	Group III	AAS82599	hypothetical protein S250_18C08.34 [Sorghum bicolor]	TC135986	homologue to UP|Q3EA47_ARATH (Q3EA47) Protein At4g13030, partial (4%)	SGN-U281939
MICRO.12906.C2	0.654533	0.697425	1.71175	1.59861	1.18137	0.97652	1.29454	Group VI	AAN86071	heat-sensitive lambda citS857 repressor protein/VP16 fusion protein [synthetic construct]	TC156579	UP|Q7B004_ECOLI (Q7B004) Phage lambda repressor protein CI, partial (77%)	SGN-U270964
MICRO.12901.C1	0.602156	1.03688	1.05585	1.14897	1.04806	0.610806	1.28601	Group III	NA	NA	TC143985	similar to UP|Q9SPK2_GOSHI (Q9SPK2) Rab GTP-binding protein Rab11a, partial (10%)	SGN-U278553
MICRO.12861.C3	0.805533	0.530209	1.01782	0.658998	1.17266	0.916635	1.16034	Group IV	BAE71234	hypothetical protein [Trifolium pratense]	TC134659	similar to UP|Q64EX4_PEA (Q64EX4) MtN19-like protein, partial (68%)	SGN-U284553
MICRO.12856.C1	1.44776	0.806397	2.06198	1.12418	1.61649	0.882392	0.77663	Group VII	ABK96797	NAC domain protein NAC2 [Solanum tuberosum]	TC159617	similar to UP|Q93XA6_PHAVU (Q93XA6) NAC domain protein NAC2, partial (55%)	SGN-U277827
MICRO.12841.C1	0.619212	1.00546	0.904816	0.80643	0.5518	2.63536	0.978532	Group II	NA	NA	TC133361	homologue to UP|RL2_LYCES (P29766) 60S ribosomal protein L2 (L8) (Ribosomal protein TL2), complete	SGN-U268493
MICRO.12824.C1	1.3623	0.951947	2.07423	2.38072	0.909605	1.04942	1.0868	Group VI	AAT74390	rapid alkalinization factor 5 [Solanum chacoense]	TC150266	similar to UP|Q6DN46_SOLCH (Q6DN46) Rapid alkalinization factor 5, partial (76%)	SGN-U271323
MICRO.1282.C2	0.554163	0.828636	1.03677	0.664581	0.721612	2.18221	0.922694	Group II	NP_566496	unknown protein [Arabidopsis thaliana]	TC134256	similar to UP|Q9MAH5_ARATH (Q9MAH5) F12M16.16, partial (36%)	SGN-U269850
MICRO.1282.C1	0.516562	0.752252	1.15647	0.626794	0.657025	2.62014	0.926791	Group II	NA	NA	TC143706	similar to UP|Q8IU42_DICDI (Q8IU42) Formin homology protein A, partial (3%)	SGN-U269851
MICRO.12808.C1	1.56806	0.967268	2.28455	2.58532	1.0149	2.12081	0.982644	Group VI	AAO85509	SGT1 [Nicotiana benthamiana]	TC149441	similar to UP|Q84UV7_NICBE (Q84UV7) SGT1, partial (88%)	SGN-U270102
MICRO.12802.C1	1.08118	1.1956	0.996031	0.535887	0.450103	3.81979	0.724661	Group II	AAL07130	putative WD40-repeat protein [Arabidopsis thaliana]	CV435584		SGN-U294338
MICRO.12780.C1	1.30959	1.08919	1.23119	1.8468	0.922855	1.6023	0.925474	Group VIII	AAU89750	late blight resistance protein-like [Solanum tuberosum]	TC156967	homologue to GB|AAT38767.1|47824995|AC149265 late blight resistance protein {Solanum demissum} (exp=0; wgp=1; cg=0), partial (6%)	SGN-U289722
MICRO.12779.C1	1.01556	0.887154	2.87084	2.72427	1.00403	1.20162	1.37772	Group VI	NP_001048268	Os02g0773400 [Oryza sativa (japonica cultivar-group)]	TC158030	similar to UP|CNG20_ARATH (Q9LD37) Probable cyclic nucleotide-gated ion channel 20, chloroplast precursor (Cyclic nucleotide-binding transporter 1), partial (43%)	SGN-U296283
MICRO.1276.C1	0.646305	1.06392	0.982256	0.803152	0.634268	1.42076	1.0735	Group II	BAA76895	LeArcA1 protein [Solanum lycopersicum]	TC135588	homologue to UP|Q9SXR9_LYCES (Q9SXR9) LeArcA1 protein, complete	SGN-U270147
MICRO.12757.C1	1.5599	0.7998	1.99773	2.53222	1.31755	1.85229	1.0174	Group VI	NA	NA	TC151780		SGN-U280399
MICRO.12756.C1	1.08153	0.899429	1.5637	0.627538	1.62622	0.752793	0.846837	Group IV	NA	NA	TC151565		SGN-U272201
MICRO.12751.C1	1.45973	0.559344	1.78333	2.38672	0.925882	1.30293	1.03001	Group VI	NA	NA	TC151374	similar to UP|Q7YDM7_9LABR (Q7YDM7) ATP synthase 8, partial (25%)	SGN-U279386
MICRO.12747.C2	0.80032	1.06295	0.887051	0.646526	0.636341	3.02419	0.92717	Group II	NP_188791	nucleotide binding [Arabidopsis thaliana]	TC162107	weakly similar to UP|Q9LVF2_ARATH (Q9LVF2) Arabidopsis thaliana genomic DNA, chromosome 3, P1 clone: MIL23, partial (15%)	SGN-U295817
MICRO.12709.C1	0.826913	0.865483	1.50124	2.25042	0.944123	4.09147	0.840232	Group VI	CAC84552	putative receptor-like serine-threonine protein kinase [Solanum tuberosum]	TC137345	similar to UP|Q9XED4_PHAVU (Q9XED4) Receptor-like protein kinase homolog RK20-1, partial (22%)	SGN-U271841
MICRO.12692.C1	0.550974	0.705474	1.01596	1.04401	1.22687	1.64372	1.87488	Group I	BAB64296	aspartic proteinase 2 [Glycine max]	TC159671	weakly similar to UP|Q2VCI9_SOLTU (Q2VCI9) Aspartic protease-like, partial (51%)	SGN-U291821
MICRO.12689.C1	1.46555	1.10191	1.55658	1.72071	1.13216	0.758461	0.997673	Group VII	AAC23542	receptor protein kinase [Ipomoea trifida]	TC137830	similar to RF|NP_192232.1|15236268|NM_116561 ATP binding {Arabidopsis thaliana} (exp=-1; wgp=0; cg=0), partial (29%)	SGN-U277311
MICRO.12678.C3	1.59866	0.755521	1.06678	2.58114	9.8896	3.16256	0.862042	Group I	NA	NA	TC154713	UP|Q8QQ03_CAMPS (Q8QQ03) CMP190.5bL, partial (16%)	SGN-U269727
MICRO.12678.C2	1.36451	0.674322	1.22108	1.13287	2.45434	2.24096	0.944269	Group I	NA	NA	TC157214		SGN-U269728
MICRO.12678.C1	1.29155	0.70348	1.31825	1.15134	2.79983	1.71441	0.845016	Group I	NA	NA	TC157214		SGN-U269728
MICRO.12677.C2	0.855106	0.546833	2.47311	1.48912	0.379875	0.425594	0.607322	Group V	P20076	Ethylene-responsive proteinase inhibitor 1 precursor (Ethylene-responsive proteinase inhibitor I)	TC153805	homologue to UP|IER1_LYCES (P20076) Ethylene-responsive proteinase inhibitor 1 precursor (Ethylene-responsive proteinase inhibitor I), complete	SGN-U274892
MICRO.12659.C1	0.680751	1.10624	2.43165	4.85713	0.548497	0.749303	1.60583	Group VIII	P23547	Glucan endo-1,3-beta-glucosidase, acidic isoform GI9 precursor ((1->3)-beta-glucan endohydrolase) ((1->3)-beta-glucanase) (Beta-1,3-endoglucanase) (PR-2B) (PR-36)	TC142955	weakly similar to UP|E13G_TOBAC (P23547) Glucan endo-1,3-beta-glucosidase, acidic isoform GI9 precursor ((1->3)-beta-glucan endohydrolase) ((1->3)-beta-glucanase) (Beta-1,3-endoglucanase) (PR-2B) (PR-36) , partial (85%)	SGN-U283906
MICRO.12655.C1	1.12532	1.2328	0.990132	1.66572	2.48239	0.868911	0.961406	Group VII	P54928	Inositol monophosphatase 3 (IMPase 3) (IMP 3) (Inositol-1(or 4)-monophosphatase 3)	TC158886	homologue to UP|IMP3_LYCES (P54928) Inositol monophosphatase 3 (IMPase 3) (IMP 3) (Inositol-1(or 4)-monophosphatase 3) , complete	SGN-U273059
MICRO.12646.C1	1.53812	0.886543	0.87497	0.962307	1.02857	1.67913	0.939137	Group I	BAB86891	syringolide-induced protein 14-1-1 [Glycine max]	TC154889	similar to UP|Q8S901_SOYBN (Q8S901) Syringolide-induced protein 14-1-1, partial (9%)	SGN-U280362
MICRO.12630.C1	1.13959	0.867122	2.53345	4.7063	1.79143	1.76253	1.51224	Group VI	BAC22609	41 kD chloroplast nucleoid DNA binding protein (CND41) [Nicotiana sylvestris]	TC140313	weakly similar to UP|O23792_TOBAC (O23792) CND41, chloroplast nucleoid DNA binding protein precursor, partial (13%)	SGN-U277797
MICRO.12592.C3	0.597188	0.610419	1.07798	0.91488	1.02475	1.2603	1.00556	Group III	AAK32813	At1g53210/F12M16_12 [Arabidopsis thaliana]	TC136024	similar to UP|Q9MAH9_ARATH (Q9MAH9) F12M16.12, partial (27%)	SGN-U298122
MICRO.1259.C1	0.871133	0.76784	0.971682	0.776085	0.688518	1.66271	1.57207	Group I	NP_566623	iron ion binding / isopenicillin-N synthase/ oxidoreductase, acting on paired donors, with incorporation or reduction of molecular oxygen, 2-oxoglutarate as one donor, and incorporation of one atom each of oxygen into both donors [Arabidopsis thaliana]	TC161608	similar to UP|Q3EB44_ARATH (Q3EB44) Protein At3g19000, partial (21%)	SGN-U283353
MICRO.1258.C1	0.549908	0.815384	1.01816	1.1021	0.874511	0.659768	1.06012	Group III	AAY58271	cell cycle switch protein CCS52A [Lotus corniculatus var. japonicus]	TC145030	similar to UP|Q4TU48_LOTJA (Q4TU48) Cell cycle switch protein CCS52A, partial (30%)	SGN-U276003
MICRO.1254.C2	1.12007	1.35467	0.909184	0.564414	0.522179	3.50936	1.03127	Group II	NP_187434	ATP binding / unfolded protein binding [Arabidopsis thaliana]	TC138940	similar to RF|NP_187434.1|15231505|NM_111656 ATP binding {Arabidopsis thaliana} (exp=-1; wgp=0; cg=0), partial (21%)	SGN-U271545
MICRO.1254.C1	0.8074	1.36272	0.993803	0.612273	0.582621	3.40656	0.94135	Group II	NP_187434	ATP binding / unfolded protein binding [Arabidopsis thaliana]	TC158482	similar to RF|NP_187434.1|15231505|NM_111656 ATP binding {Arabidopsis thaliana} (exp=-1; wgp=0; cg=0), partial (71%)	SGN-U271545
MICRO.12441.C1	1.51675	0.762983	3.20198	1.08802	0.894882	1.62388	0.802086	Group VI	AAB96796	ethylene-responsive late embryogenesis-like protein [Lycopersicon esculentum]	TC142824	homologue to UP|P93220_LYCES (P93220) Ethylene-responsive late embryogenesis-like protein, complete	SGN-U273721
MICRO.12424.C1	0.763906	0.822456	2.82328	1.44494	1.29585	3.20991	1.09151	Group VI	NP_001044247	Os01g0749300 [Oryza sativa (japonica cultivar-group)]	TC142010	similar to UP|Q94J16_ORYSA (Q94J16) Heat shock factor RHSF9, partial (30%)	SGN-U283935
MICRO.12410.C2	1.48795	0.71537	0.862266	0.448175	0.367079	46.1155	0.722857	Group II	BAA21922	ZPT2-13 [Petunia x hybrida]	TC150091	similar to UP|O22085_PETHY (O22085) ZPT2-13, partial (63%)	SGN-U274076
MICRO.12390.C1	1.40939	0.696675	1.16759	1.63535	1.65821	1.14173	1.15709	Group VII	AAP46144	ferric-chelate reductase [Lycopersicon esculentum]	TC141544	homologue to UP|Q6EMC0_LYCES (Q6EMC0) Ferric-chelate reductase, partial (47%)	SGN-U272633
MICRO.12385.C1	1.84164	0.747716	1.05411	1.5249	1.6694	1.84593	1.07776	Group I	BAB16427	NtEIG-E80 [Nicotiana tabacum]	TC138183	similar to UP|Q9FXS6_TOBAC (Q9FXS6) NtEIG-E80 protein, partial (47%)	SGN-U280456
MICRO.12376.C1	0.437904	0.671061	1.05303	1.24071	1.5306	1.6805	1.49264	Group I	ABC47842	membrane protein-like protein [Glycine max]	TC139611	similar to UP|Q6Z001_ORYSA (Q6Z001) Membrane protein-like, partial (35%)	SGN-U282488
MICRO.12366.C1	0.5901	0.759447	0.989056	1.18353	2.56928	0.665262	1.03748	Group VII	CAD12836	diphosphonucleotide phosphatase 1 [Lupinus luteus]	TC160728	similar to UP|Q8VX11_LUPLU (Q8VX11) Diphosphonucleotide phosphatase 1 precursor, partial (59%)	SGN-U285563
MICRO.12342.C1	0.540951	1.2181	0.867963	0.964992	0.616312	2.15432	0.831042	Group II	XP_001057319	PREDICTED: hypothetical protein [Rattus norvegicus]	TC156120	weakly similar to UP|Q6T284_9ROSI (Q6T284) Predicted protein, partial (3%)	SGN-U279920
MICRO.12327.C1	1.22248	1.2834	0.90824	0.793408	0.63919	0.577103	0.888397	Group V	O49939	Peptidyl-prolyl cis-trans isomerase, chloroplast precursor (40 kDa thylakoid lumen PPIase) (40 kDa thylakoid lumen rotamase)	TC146666	similar to GB|AAS75307.1|45680876|AY568524 multidomain cyclophilin type peptidyl-prolyl cis-trans isomerase {Arabidopsis thaliana} (exp=-1; wgp=0; cg=0), partial (30%)	SGN-U285192
MICRO.1232.C1	1.00113	1.04382	1.03043	0.586704	0.590323	2.64814	0.86888	Group II	CAC85728	aspartate carbamoyltransferase [Solanum tuberosum]	TC142917	UP|Q8L6B8_SOLTU (Q8L6B8) Aspartate carbamoyltransferase, complete	SGN-U272973
MICRO.12304.C1	0.712125	1.32873	0.99427	1.07262	0.366512	0.56573	0.94504	Group V	NA	NA	TC140254	weakly similar to UP|Q3AE71_CARHZ (Q3AE71) Response regulator protein, partial (10%)	SGN-U284096
MICRO.12262.C1	1.52385	1.57056	0.861156	0.819883	0.829035	1.37969	0.954078	Group I	NA	NA	TC156307	similar to UP|Q6AST9_ORYSA (Q6AST9) Expressed protein, partial (10%)	SGN-U277994
MICRO.12238.C1	1.50073	1.0037	2.64872	2.81666	1.06151	1.69726	1.43626	Group VI	NP_177557	protein binding [Arabidopsis thaliana]	TC160980	weakly similar to RF|NP_177557.1|15221160|NM_106077 protein binding {Arabidopsis thaliana} (exp=-1; wgp=0; cg=0), partial (9%)	SGN-U280804
MICRO.12226.C1	0.908474	0.573287	0.908093	0.986527	1.0489	0.446202	1.12105	Group IV	NA	NA	TC157545	homologue to UP|Q9ZTM9_PETHY (Q9ZTM9) PGPS/D10, partial (22%)	SGN-U268065
MICRO.12209.C1	1.37034	0.458626	0.873723	0.93767	1.47006	1.85454	1.58688	Group I	ABD28668	Peptidase C14, caspase catalytic subunit p20 [Medicago truncatula]	TC158661	weakly similar to UP|Q2HUG6_MEDTR (Q2HUG6) Peptidase C14, caspase catalytic subunit p20, partial (20%)	SGN-U280218
MICRO.12208.C1	1.18485	1.03222	2.70798	2.83668	1.30504	1.36212	1.05709	Group VI	AAF33669	cyclic nucleotide-gated calmodulin-binding ion channel [Nicotiana tabacum]	TC138541	similar to UP|Q9M7Q8_TOBAC (Q9M7Q8) Cyclic nucleotide-gated calmodulin-binding ion channel, partial (33%)	SGN-U276357
MICRO.12199.C2	0.923422	0.803069	1.27484	1.84593	2.23697	1.05067	1.0601	Group VII	NP_187889	unknown protein [Arabidopsis thaliana]	TC156025	similar to UP|Q9LTV3_ARATH (Q9LTV3) Auxin-regulated protein-like (At3g12830), partial (71%)	SGN-U274814
MICRO.12182.C2	1.32224	0.66004	1.86744	2.06001	1.40952	2.43116	1.27537	Group VI	AAR08414	metal transport protein [Medicago truncatula]	TC161678	similar to UP|Q531A6_FRAAN (Q531A6) Zinc transporter protein ZIP2, partial (76%)	SGN-U274630
MICRO.1218.C1	0.956928	0.498595	0.892839	0.955082	0.912574	0.596387	0.989436	Group IV	CAB81548	putative proline-rich protein APG isolog [Cicer arietinum]	TC140810	similar to UP|Q9LU14_ARATH (Q9LU14) Proline-rich protein APG-like; GDSL-motif lipase/hydrolase-like protein (AT3g16370/MYA6_18), partial (62%)	SGN-U270196
MICRO.12177.C1	1.37092	1.19112	1.27713	0.845306	1.48922	0.633109	0.649939	Group V	NA	NA	TC143822	similar to UP|Q6X5U1_ARATH (Q6X5U1) DVL2, partial (76%)	SGN-U281823
MICRO.12171.C1	1.43738	0.593422	1.79213	0.920056	1.20883	4.85157	1.07935	Group I	AAK58483	alternative oxidase 1b [Lycopersicon esculentum]	TC142072	homologue to UP|Q84V46_LYCES (Q84V46) Alternative oxidase 1b, partial (98%)	SGN-U277126
MICRO.12150.C1	2.04841	1.33888	0.917083	0.936133	1.20341	1.9064	1.05882	Group I	NA	NA	TC148996		SGN-U283564
MICRO.12137.C1	0.852399	0.942549	1.14515	0.613783	0.883887	1.4156	0.451825	Group V	Q43188	Chalcone synthase 2 (Naringenin-chalcone synthase 2)	TC143194	UP|CHS2_SOLTU (Q43188) Chalcone synthase 2 (Naringenin-chalcone synthase 2) , complete	SGN-U269996
MICRO.12079.C1	1.56733	1.0719	0.938219	0.977917	1.26012	1.50176	0.779708	Group I	NA	NA	TC159789	similar to UP|Q8TUV1_METKA (Q8TUV1) L-lactate permease, partial (4%)	SGN-U284259
MICRO.12072.C1	0.760358	0.665308	1.00858	1.16601	1.29301	0.583721	0.874687	Group IV	NP_001047881	Os02g0708200 [Oryza sativa (japonica cultivar-group)]	TC138968	similar to UP|Q6YV21_ORYSA (Q6YV21) Uridine kinase-like protein, partial (31%)	SGN-U276544
MICRO.11978.C2	0.446175	1.07649	0.815622	0.776532	0.480756	1.44418	0.952555	Group II	NP_568378	OEP80 (ARABIDOPSIS THALIANA OUTER ENVELOPE PROTEIN OF 80 KDA) [Arabidopsis thaliana]	TC142148		SGN-U297915
MICRO.11899.C3	0.897204	0.827083	1.04165	1.77977	2.01577	1.27152	0.920201	Group VII	O24059	Metallothionein-like protein type 3 (MT-3)	TC154644	similar to UP|MT3_MALDO (O24059) Metallothionein-like protein type 3 (MT-3), partial (77%)	SGN-U269805
MICRO.11899.C2	0.975031	0.904666	0.962193	2.58347	1.86951	1.12271	0.959257	Group VII	AAX27955	unknown [Schistosoma japonicum]	BQ045572	weakly similar to SP|Q96386|MT3_CARPA Metallothionein-like protein type 3. [Papaya] {Carica papaya}, partial (90%)	SGN-U269805
MICRO.11893.C1	0.860706	0.489708	1.01203	1.54475	3.11388	0.823301	1.19934	Group VII	Q42910	Pyruvate, phosphate dikinase, chloroplast precursor (Pyruvate, orthophosphate dikinase)	TC153810	similar to UP|PPDK_MESCR (Q42910) Pyruvate, phosphate dikinase, chloroplast precursor (Pyruvate, orthophosphate dikinase) , partial (53%)	SGN-U280698
MICRO.11892.C1	1.15646	1.38635	0.83927	0.885154	0.632707	0.472855	0.881744	Group V	CAA06820	acyl-coA synthetase [Cicer arietinum]	TC150479	similar to UP|Q2I824_GOSHI (Q2I824) ACS-like protein, partial (31%)	SGN-U275394
MICRO.1188.C3	0.518355	0.968115	0.814854	1.33942	1.40836	0.560466	0.728516	Group III	CAB64599	arginine decarboxylase 1 [Datura stramonium]	TC138929	UP|Q8H9D0_SOLTU (Q8H9D0) Arginine decarboxylase (Fragment), complete	SGN-U269363
MICRO.11849.C1	1.14034	1.48631	0.943798	0.841768	0.488358	0.640381	1.0215	Group V	NA	NA	TC159492		SGN-U279251
MICRO.11832.C1	1.10999	0.989089	0.98068	1.16578	1.69628	1.63458	1.49108	Group I	YP_001061172	Rhs element Vgr protein [Burkholderia pseudomallei 668]	TC147090		SGN-U276385
MICRO.11820.C1	1.11796	0.814933	1.74156	1.94481	1.28442	2.37006	1.07221	Group VI	AAC78592	Hcr2-0A [Lycopersicon esculentum]	TC157792	similar to UP|Q9ZTK0_LYCES (Q9ZTK0) Hcr2-0A, partial (27%)	SGN-U286017
MICRO.11800.C1	1.35368	1.44016	1.13092	2.22153	4.79578	1.58308	0.985786	Group VII	NP_191964	DGD2; UDP-galactose:MGDG galactosyltransferase/ transferase, transferring glycosyl groups [Arabidopsis thaliana]	TC142634	similar to RF|NP_912368.1|34902044|NM_187479 name {Oryza sativa (japonica cultivar-group)} (exp=-1; wgp=0; cg=0), partial (21%)	SGN-U291326
MICRO.11788.C1	1.24063	1.55381	0.769849	1.01887	0.85661	2.03664	0.659018	Group I	NA	NA	TC152158	homologue to UP|Q9VCS1_DROME (Q9VCS1) CG13838-PA (IP04268p), partial (13%)	SGN-U281286
MICRO.11785.C1	1.18934	1.14775	0.989715	0.951691	0.654339	0.543793	1.1001	Group V	NP_199595	ATP binding / adenylate kinase/ nucleotide kinase/ phosphotransferase, phosphate group as acceptor [Arabidopsis thaliana]	TC160178	similar to UP|KADC2_ARATH (Q9FIJ7) Probable adenylate kinase 2, chloroplast precursor (ATP-AMP transphosphorylase) , partial (39%)	SGN-U297111
MICRO.11738.C1	1.25286	0.605433	1.99381	0.993163	1.18321	1.62648	0.574752	Group VI	AAB67865	lipoxygenase [Solanum tuberosum]	TC142994	UP|Q43191_SOLTU (Q43191) Lipoxygenase , complete	SGN-U283623
MICRO.11721.C1	1.0278	1.14108	1.0779	0.569867	0.658562	1.66711	0.950381	Group II	NP_173710	unknown protein [Arabidopsis thaliana]	TC140285		SGN-U285889
MICRO.11710.C1	1.70369	0.684875	2.45036	3.77491	1.52226	1.62934	1.6907	Group VI	ABG23376	phytophthora-inhibited protease 1 [Solanum lycopersicum]	TC137767	weakly similar to UP|Q6F6A4_DAUCA (Q6F6A4) Cysteine protease, partial (33%)	SGN-U279648
MICRO.11686.C1	2.25763	0.909932	5.51848	7.70061	1.0886	2.44452	1.9495	Group VI	ABE87703	DNA-binding WRKY [Medicago truncatula]	TC138784	similar to UP|Q20DQ1_ORYSA (Q20DQ1) WRKY transcription factor 7, partial (33%)	SGN-U274884
MICRO.11665.C1	1.40965	0.826519	1.68197	0.745158	1.28089	9.09112	0.846428	Group I	BAA87058	WIZZ [Nicotiana tabacum]	TC138077	similar to UP|Q9SSX8_TOBAC (Q9SSX8) WIZZ, partial (37%)	SGN-U280407
MICRO.11662.C1	1.30934	0.958601	1.69222	2.66262	1.35639	1.5923	1.04229	Group VI	NP_565553	XLG (EXTRA-LARGE G-PROTEIN); guanyl nucleotide binding / signal transducer [Arabidopsis thaliana]	TC140173	weakly similar to UP|Q2QMS5_ORYSA (Q2QMS5) Extra-large G-protein, partial (16%)	SGN-U277550
MICRO.11660.C1	0.961749	1.10064	1.14926	0.84819	0.902984	2.75043	2.23727	Group I	NA	NA	TC162146		SGN-U291999
MICRO.11658.C1	0.730327	0.729158	1.14996	1.24235	1.62894	3.9437	1.86816	Group I	ABO81845	Lipolytic enzyme, G-D-S-L [Medicago truncatula]	TC145629	similar to UP|Q9LQS5_ARATH (Q9LQS5) T4O12.13, partial (9%)	SGN-U286609
MICRO.11657.C1	2.18957	0.733742	8.96523	5.00278	0.677729	0.584615	1.83571	Group VI	NA	NA	BG594150		SGN-U278697
MICRO.11643.C1	1.54136	1.2688	1.18924	0.782988	1.44929	1.64335	1.12946	Group I	NA	NA	TC161725		SGN-U281912
MICRO.11642.C2	0.563912	0.929306	0.918715	1.31471	0.75668	0.586898	1.18985	Group III	NP_564219	nucleotide binding [Arabidopsis thaliana]	TC136052	similar to UP|O48679_ARATH (O48679) F3I6.5 protein, partial (31%)	SGN-U276755
MICRO.11637.C1	1.33131	1.56867	0.913804	6.25148	0.836549	2.99849	1.55397	Group VIII	NP_196825	unknown protein [Arabidopsis thaliana]	TC138130	similar to UP|Q9LRY2_ARATH (Q9LRY2) Arabidopsis thaliana genomic DNA, chromosome 3, TAC clone:K7P8, partial (17%)	SGN-U283957
MICRO.11618.C3	1.39728	0.570328	4.00533	1.65369	1.24798	5.58917	2.16601	Group VI	NP_001061950	Os08g0451800 [Oryza sativa (japonica cultivar-group)]	TC138268	similar to UP|Q22BJ7_TETTH (Q22BJ7) IBR domain containing protein, partial (4%)	SGN-U289803
MICRO.11618.C2	1.09285	0.953592	0.759103	1.08394	1.06859	1.94947	2.37224	Group I	NP_001061950	Os08g0451800 [Oryza sativa (japonica cultivar-group)]	TC156144	similar to UP|Q9SJT6_ARATH (Q9SJT6) Mutator-like transposase, partial (5%)	SGN-U289803
MICRO.11603.C1	1.8987	0.989734	2.6278	2.48355	0.883641	1.86347	1.2184	Group VI	ABE93792	Ankyrin [Medicago truncatula]	BQ514796		SGN-U291425
MICRO.11602.C1	1.16534	1.04672	2.32181	1.86364	0.997098	1.20709	1.19636	Group VI	ABE93792	Ankyrin [Medicago truncatula]	TC149826	similar to UP|Q9LVG7_ARATH (Q9LVG7) Ankyrin-like protein (Ankyrin repeat family protein), partial (52%)	SGN-U277876
MICRO.11599.C1	1.25593	1.09054	1.06545	2.01032	2.48669	1.66809	2.80929	Group IV	P17815	Malate synthase, glyoxysomal	TC148554	similar to UP|MASY_RICCO (P17815) Malate synthase, glyoxysomal , partial (39%)	SGN-U278378
MICRO.11598.C1	1.29203	1.36573	0.735589	1.37503	1.50409	1.97741	0.705106	Group I	ABI34321	RNase H family protein [Solanum demissum]	TC145108	weakly similar to GB|1F21_A|12084647|1F21_A Chain A, Divalent Metal Cofactor Binding In The Kinetic Folding Trajectory Of E. Coli Ribonuclease Hi. {Escherichia coli} (exp=-1; wgp=0; cg=0), partial (15%)	SGN-U280584
MICRO.11586.C1	0.564222	1.01349	1.00751	0.67033	0.542174	2.02572	1.14524	Group II	NP_001060183	Os07g0598500 [Oryza sativa (japonica cultivar-group)]	TC138707	weakly similar to UP|Q2HUF5_MEDTR (Q2HUF5) Tetratricopeptide-like helical, partial (55%)	SGN-U294485
MICRO.11566.C1	0.955542	1.3263	0.867027	0.653961	0.562474	1.51898	0.990611	Group II	NP_196000	EMB175 (EMBRYO DEFECTIVE 175); catalytic [Arabidopsis thaliana]	BQ511443	weakly similar to UP|BAC83621 (BAC83621) Selenium-binding protein-like, partial (18%)	SGN-U294562
MICRO.11505.C1	0.895725	0.944107	1.02175	0.610977	0.543936	1.59803	0.84236	Group II	NP_566792	DNA binding / N-methyltransferase [Arabidopsis thaliana]	TC156505		SGN-U280909
MICRO.11438.C1	1.59901	0.79659	1.3605	0.686719	0.938366	2.56763	0.946737	Group I	AAG43545	Avr9/Cf-9 rapidly elicited protein 1 [Nicotiana tabacum]	TC135305	similar to UP|Q9FR02_TOBAC (Q9FR02) Avr9/Cf-9 rapidly elicited protein 1, partial (83%)	SGN-U294478
MICRO.11437.C1	1.59472	0.975029	0.754193	1.31512	1.24587	1.75075	0.719066	Group I	NA	NA	TC146549		SGN-U281389
MICRO.11392.C1	0.7072	1.00317	1.64452	1.5898	1.24908	1.5865	0.953336	Group VI	NP_180334	unknown protein [Arabidopsis thaliana]	TC133946		SGN-U280180
MICRO.11336.C2	1.21541	0.672342	1.15511	1.5109	1.45828	1.79728	1.08729	Group VI	ABD32310	Glycoside hydrolase, family 18 [Medicago truncatula]	DN590564		SGN-U278345
MICRO.11325.C1	1.1129	0.870997	1.08126	1.75666	2.53454	0.586457	0.984331	Group VII	ABE88368	hypothetical protein MtrDRAFT_AC149637g23v1 [Medicago truncatula]	TC149090	weakly similar to UP|Q548R9_RAT (Q548R9) Amphoterin, partial (11%)	SGN-U275447
MICRO.11307.C1	1.43638	0.86551	3.37802	2.68917	1.17066	1.66974	1.36506	Group VI	NP_173361	zinc ion binding [Arabidopsis thaliana]	TC154423		SGN-U281750
MICRO.11296.C2	1.09304	0.828016	3.3981	4.72429	1.15074	1.34424	1.31999	Group VI	P09762	Wound-induced protein WIN2 precursor	TC161192	UP|WIN2_SOLTU (P09762) Wound-induced protein WIN2 precursor, partial (68%)	SGN-U271959
MICRO.11296.C1	1.10038	0.881698	2.6354	3.39318	1.19507	0.978933	0.805727	Group VII	P09762	Wound-induced protein WIN2 precursor	TC134437	UP|WIN2_SOLTU (P09762) Wound-induced protein WIN2 precursor, complete	SGN-U271959
MICRO.11288.C1	1.08852	1.09485	0.982763	0.657339	0.58789	2.96154	0.874996	Group II	ABE82021	Pre-mRNA processing ribonucleoprotein, binding region; NOP5, N-terminal; NOSIC [Medicago truncatula]	TC144530	similar to UP|Q9ZRW0_CICAR (Q9ZRW0) Nucleolar protein (Fragment), partial (20%)	SGN-U277407
MICRO.11279.C1	1.34647	0.80243	2.03748	1.56397	1.13846	3.82211	1.35748	Group I	CAA47921	chitinase; endochitinase [Solanum tuberosum]	TC133076	UP|Q43184_SOLTU (Q43184) Endochitinase (Chitinase) , complete	SGN-U272817
MICRO.11274.C1	1.7061	0.99659	2.17041	1.74524	0.905949	1.61081	0.843075	Group VI	NA	NA	TC146370		SGN-U287268
MICRO.11269.C1	1.19373	0.805333	1.54075	1.55229	1.24237	2.92799	0.819862	Group VI	AAD11808	syntaxin-related protein Nt-syr1 [Nicotiana tabacum]	TC136307	homologue to UP|Q9ZSD5_TOBAC (Q9ZSD5) Syntaxin-related protein Nt-syr1, partial (40%)	SGN-U276822
MICRO.11253.C1	1.33121	0.770439	1.19497	1.86901	1.31124	1.61006	1.65343	Group VI	EAY95314	hypothetical protein OsI_016547 [Oryza sativa (indica cultivar-group)]	TC135357	weakly similar to UP|Q8LFS2_ARATH (Q8LFS2) Regulatory protein, partial (34%)	SGN-U282686
MICRO.11233.C1	0.713561	0.521927	0.962832	1.18252	1.20711	0.646468	1.4036	Group IV	NP_192815	ATOPT7; oligopeptide transporter [Arabidopsis thaliana]	TC161677	similar to UP|OPT7_ARATH (O82485) Oligopeptide transporter 7 (AtOPT7), partial (31%)	SGN-U283896
MICRO.11215.C1	0.532228	0.476035	1.03065	1.11245	1.06102	0.861796	1.36503	Group III	AAY60845	cellulose synthase 3 [Eucalyptus grandis]	BQ120449	homologue to UP|Q8GSW2 (Q8GSW2) Cellulose synthase, partial (11%)	SGN-U283809
MICRO.11210.C1	1.03318	1.30262	0.952578	0.66311	0.481741	0.830626	0.85856	Group II	ABI63585	biotin synthase [Brassica rapa subsp. pekinensis]	CV505779		SGN-U283679
MICRO.11209.C1	1.02403	1.01186	1.27223	0.574623	0.596333	5.24622	0.78838	Group II	NP_196762	unknown protein [Arabidopsis thaliana]	TC144219	similar to GB|AAN73294.1|25141199|BT002297 At5g12010/F14F18_180 {Arabidopsis thaliana} (exp=-1; wgp=0; cg=0), partial (36%)	SGN-U286426
MICRO.11185.C1	0.632646	1.22805	0.985432	0.527594	0.472129	3.19061	0.757839	Group II	NP_188905	unknown protein [Arabidopsis thaliana]	TC149933	similar to UP|EBP2_ARATH (Q9LUJ5) Probable rRNA-processing protein EBP2 homolog, partial (52%)	SGN-U298402
MICRO.11155.C1	0.755639	1.04104	1.09628	0.613682	0.615121	2.41657	0.83558	Group II	NP_565782	nucleotide binding [Arabidopsis thaliana]	TC137916	similar to UP|Q3EBN4_ARATH (Q3EBN4) Protein At2g34260, partial (57%)	SGN-U276635
MICRO.11131.C1	1.35795	0.745193	1.09089	0.621232	0.75939	0.37083	0.805665	Group IV	AAK54465	cold-induced glucosyl transferase [Solanum sogarandinum]	BQ112289	homologue to UP|Q94IP3 (Q94IP3) Cold-induced glucosyl transferase, partial (13%)	SGN-U297030
MICRO.11118.C1	1.5567	1.3334	1.22932	1.17307	0.782899	4.49311	1.0201	Group I	NP_001067297	Os12g0620600 [Oryza sativa (japonica cultivar-group)]	TC146741	similar to UP|Q2QM21_ORYSA (Q2QM21) Expressed protein, partial (26%)	SGN-U278558
MICRO.11102.C1	0.654796	0.50071	0.901023	0.692092	1.06532	0.85613	1.2484	Group III	NP_566831	unknown protein [Arabidopsis thaliana]	TC153385	weakly similar to UP|Q9FL08_ARATH (Q9FL08) Nodulin-like protein (At5g40240), partial (43%)	SGN-U280057
MICRO.11101.C1	0.837419	1.11593	0.93821	0.618692	0.64577	3.10799	0.939033	Group II	NP_197229	unknown protein [Arabidopsis thaliana]	TC161497		SGN-U283684
MICRO.111.C1	0.438802	0.943153	1.09484	1.08437	0.992627	0.598287	1.32783	Group III	ABB87110	unknown [Solanum tuberosum]	TC150905	homologue to UP|Q2V9C6_SOLTU (Q2V9C6) Phosphoglycerate kinase-like, complete	SGN-U268934
MICRO.11070.C1	0.739379	0.595781	1.35532	1.13945	0.4826	1.1048	0.884248	Group V	P29060	Acidic endochitinase precursor	CV497183		SGN-U276330
MICRO.11054.C1	1.09568	0.938563	1.62755	1.80254	1.02487	1.79443	1.48755	Group VI	AAP20228	resistance protein SlVe1 precursor [Solanum lycopersicoides]	TC140016	similar to UP|Q6WJD3_9SOLN (Q6WJD3) Disease resistance protein SlVe2 precursor, partial (23%)	SGN-U284164
MICRO.11050.C1	1.28849	0.62827	1.12291	0.574144	0.551843	2.3186	0.767401	Group I	EAY82874	hypothetical protein OsI_036833 [Oryza sativa (indica cultivar-group)]	TC155305	similar to UP|Q69MP4_ORYSA (Q69MP4) Organic cation transporter-like protein, partial (28%)	SGN-U278493
MICRO.11043.C1	1.75902	0.989813	1.51518	1.4342	1.05633	0.768667	0.858312	Group VI	NA	NA	TC156925		SGN-U271165
MICRO.11037.C1	1.75743	0.785385	1.0523	1.05602	0.948309	3.83845	0.803427	Group I	BAA89423	allyl alcohol dehydrogenase [Nicotiana tabacum]	TC145473	similar to UP|Q9SLN8_TOBAC (Q9SLN8) Allyl alcohol dehydrogenase, partial (97%)	SGN-U288637
MICRO.11033.C1	1.02845	0.813911	1.95809	1.76743	1.15367	1.74862	0.844471	Group VI	NA	NA	TC150119		SGN-U279238
MICRO.11021.C1	1.09707	0.838418	1.68314	2.92887	1.47426	1.29924	1.32271	Group VI	BAA22813	CND41, chloroplast nucleoid DNA binding protein [Nicotiana tabacum]	TC160740	weakly similar to GB|AAF68120.1|7715602|AC010793 F20B17.14 {Arabidopsis thaliana} (exp=0; wgp=1; cg=0), partial (11%)	SGN-U280043
MICRO.11.C2	1.0894	0.758567	0.73788	0.38423	1.33916	0.394708	0.380787	Group IV	ABB84472	rhamnose:beta-solanine/beta-chaconine rhamnosyltransferase [Solanum tuberosum]	TC150657	UP|Q2I6N7_SOLTU (Q2I6N7) Rhamnose:beta-solanine/beta-chaconine rhamnosyltransferase, complete	SGN-U269471
MICRO.11.C1	1.41313	0.845303	0.628779	0.513954	1.27098	0.339617	0.345309	Group IV	ABB84472	rhamnose:beta-solanine/beta-chaconine rhamnosyltransferase [Solanum tuberosum]	TC161812	homologue to UP|Q2I6N7_SOLTU (Q2I6N7) Rhamnose:beta-solanine/beta-chaconine rhamnosyltransferase, partial (27%)	SGN-U269471
MICRO.10996.C1	1.14086	1.0132	1.16627	1.52272	2.43659	0.741499	1.02053	Group VII	EAY83279	hypothetical protein OsI_037238 [Oryza sativa (indica cultivar-group)]	BQ516891		SGN-U280558
MICRO.10990.C1	0.96487	0.949456	0.914887	0.902098	1.85334	2.08719	1.31271	Group I	ABM91070	xyloglucan endotransglycosylase/hydrolase precursor XTH-3 [Populus tremula x Populus tremuloides]	TC156482	weakly similar to GB|AAB18365.1|1244754|ATU43486 xyloglucan endotransglycosylase-related protein {Arabidopsis thaliana} (exp=-1; wgp=0; cg=0), partial (74%)	SGN-U279088
MICRO.1099.C1	0.508134	0.951732	1.08835	0.730823	0.639328	3.69923	1.14411	Group II	NP_176007	NOP56 [Arabidopsis thaliana]	TC138751	similar to GB|AAG40838.1|11878189|AF302492 NOP56-like protein {Arabidopsis thaliana} (exp=-1; wgp=0; cg=0), partial (75%)	SGN-U271440
MICRO.10988.C3	1.8812	0.651853	1.08304	1.14986	1.17241	2.0451	0.81896	Group I	NP_564075	unknown protein [Arabidopsis thaliana]	TC133563	similar to UP|Q3ED96_ARATH (Q3ED96) Protein At1g19180, partial (15%)	SGN-U278688
MICRO.10982.C1	0.657691	0.720453	0.957951	1.32822	1.26924	0.444756	0.997542	Group III	ABD28350	Protein phosphatase 2C-like [Medicago truncatula]	TC138124	similar to UP|Q2HW33_MEDTR (Q2HW33) Protein phosphatase 2C-like, partial (76%)	SGN-U278632
MICRO.10963.C2	0.774433	0.606824	0.878754	0.946252	1.13908	0.576412	0.910701	Group IV	S00629	pectinesterase (EC 3.1.1.11) precursor (clone PE1) - tomato	TC142443	UP|Q9SEE7_SOLTU (Q9SEE7) Pectin methyl esterase (Fragment), complete	SGN-U271858
MICRO.1094.C2	0.599359	0.585944	1.01578	1.1034	1.00943	1.17083	1.02356	Group III	AAP03021	4-coumarate-CoA ligase-like protein [Arabidopsis thaliana]	TC137014	similar to UP|Q9LMV8_ARATH (Q9LMV8) F5M15.17, partial (83%)	SGN-U271180
MICRO.10936.C1	0.854438	1.08793	1.00414	0.594117	0.532241	2.10367	0.906455	Group II	ABE92033	expressed protein [Medicago truncatula]	TC137163	similar to UP|Q9SK63_ARATH (Q9SK63) Expressed protein, partial (64%)	SGN-U282024
MICRO.10912.C1	1.7232	1.24734	1.77219	3.57569	1.56347	5.00794	1.08461	Group VI	AAN62015	leucine-rich repeat protein [Capsicum annuum]	TC150072	similar to UP|Q8H6W9_CAPAN (Q8H6W9) Leucine-rich repeat protein, complete	SGN-U279991
MICRO.1091.C4	0.98759	1.21878	0.986143	0.520517	0.444571	2.97412	0.783312	Group II	NP_001054461	Os05g0114500 [Oryza sativa (japonica cultivar-group)]	TC151612	weakly similar to RF|NP_191094.1|15233246|NM_115392 RNA binding {Arabidopsis thaliana} (exp=-1; wgp=0; cg=0), partial (24%)	SGN-U291325
MICRO.1091.C2	0.728545	1.16101	1.0706	0.586513	0.546093	2.24862	0.873682	Group II	NP_001054461	Os05g0114500 [Oryza sativa (japonica cultivar-group)]	TC151612	weakly similar to RF|NP_191094.1|15233246|NM_115392 RNA binding {Arabidopsis thaliana} (exp=-1; wgp=0; cg=0), partial (24%)	SGN-U291325
MICRO.1086.C1	0.480133	0.659022	1.07053	1.06579	1.27002	0.709328	1.0677	Group III	AAM73656	AER [Nicotiana tabacum]	TC135046	similar to UP|Q8LLM2_TOBAC (Q8LLM2) AER, partial (98%)	SGN-U270273
MICRO.10853.C1	1.16167	1.32914	0.799741	0.586343	0.397563	3.32321	0.906309	Group II	NA	NA	TC155596	similar to UP|Q9AV96_TOBAC (Q9AV96) MAR-binding protein, partial (5%)	SGN-U275820
MICRO.10836.C1	1.1988	1.31921	1.0821	1.73483	0.489812	0.498528	1.26397	Group V	NA	NA	BQ517130		SGN-U280784
MICRO.10801.C1	1.15143	1.2626	0.997279	0.605253	0.609062	3.75484	0.858743	Group II	AAF27100	Putative phospatase 2A inhibitor [Arabidopsis thaliana]	TC139165	similar to UP|Q9M9V0_ARATH (Q9M9V0) F6A14.10 protein, partial (82%)	SGN-U270870
MICRO.10797.C2	0.545861	1.20337	1.05588	1.24108	0.873627	0.585567	0.991241	Group III	NP_565829	unknown protein [Arabidopsis thaliana]	TC149510	similar to GB|AAL14415.1|16209720|AY057620 At2g35880/F11F19.21 {Arabidopsis thaliana} (exp=-1; wgp=0; cg=0), partial (21%)	SGN-U274432
MICRO.10772.C1	0.637912	0.497841	1.09116	0.985682	1.07641	0.678554	1.22532	Group IV	ABE83261	Protein kinase; Concanavalin A-like lectin/glucanase [Medicago truncatula]	TC142738		SGN-U283733
MICRO.1075.C4	1.41257	1.07106	1.0942	0.631315	0.649315	1.63308	0.699455	Group II	BAA33810	phi-1 [Nicotiana tabacum]	TC135092	similar to UP|O82161_TOBAC (O82161) Phi-1 protein, complete	SGN-U272972
MICRO.1075.C1	1.78138	1.75957	1.07721	0.499259	1.47534	2.8004	0.775639	Group I	BAA33810	phi-1 [Nicotiana tabacum]	TC133353	homologue to UP|O82161_TOBAC (O82161) Phi-1 protein, partial (97%)	SGN-U272972
MICRO.10721.C1	0.980868	1.37057	1.0017	0.634583	0.578035	2.41744	0.896164	Group II	NA	NA	TC147521		SGN-U282354
MICRO.10695.C1	0.99241	1.00126	1.1132	1.0918	1.66174	2.25716	1.05592	Group I	EAZ40607	hypothetical protein OsJ_024090 [Oryza sativa (japonica cultivar-group)]	TC155017	similar to UP|NFYA5_ARATH (Q9SYH4) Nuclear transcription factor Y subunit A-5 (AtNF-YA-5), partial (26%)	SGN-U279405
MICRO.10664.C1	0.833898	0.789955	1.10814	1.38543	1.65696	1.65292	0.819926	Group I	NP_176860	ATP binding / protein kinase/ protein serine/threonine kinase/ protein-tyrosine kinase [Arabidopsis thaliana]	TC140338	similar to RF|NP_176860.2|30697422|NM_105359 ATP binding {Arabidopsis thaliana} (exp=-1; wgp=0; cg=0), partial (9%)	SGN-U283851
MICRO.10656.C1	0.792796	1.06086	1.36481	0.620628	0.411048	13.7065	0.821088	Group II	NP_567834	unknown protein [Arabidopsis thaliana]	TC152346	similar to GB|AAN73294.1|25141199|BT002297 At5g12010/F14F18_180 {Arabidopsis thaliana} (exp=-1; wgp=0; cg=0), partial (21%)	SGN-U282558
MICRO.10631.C1	0.662747	0.640985	0.960014	0.778483	0.913629	0.949283	1.03939	Group III	NP_196717	catalytic [Arabidopsis thaliana]	TC141831	similar to RF|NP_196717.2|30683676|NM_121194 catalytic {Arabidopsis thaliana} (exp=-1; wgp=0; cg=0), partial (12%)	SGN-U283053
MICRO.10623.C1	0.914902	1.51516	1.21949	1.24649	0.604918	0.471243	0.485841	Group V	ABE80955	hypothetical protein MtrDRAFT_AC138131g18v2 [Medicago truncatula]	TC143321	similar to UP|GAS5_YEAST (Q08193) Glycolipid-anchored surface protein 5 precursor, partial (4%)	SGN-U276524
MICRO.10621.C1	1.50226	0.7167	1.08763	1.22814	1.86887	1.87116	0.761578	Group I	NP_188425	unknown protein [Arabidopsis thaliana]	TC139403	similar to UP|Q9LVH4_ARATH (Q9LVH4) GTPase activating protein-like (At3g17980), partial (92%)	SGN-U271745
MICRO.10606.C2	1.34237	1.50782	1.32832	1.20448	6.8546	1.00694	1.15033	Group VII	AAO32318	phosphoenolpyruvate carboxylase kinase 2 [Lycopersicon esculentum]	TC138027	homologue to UP|Q84JP7_LYCES (Q84JP7) Phosphoenolpyruvate carboxylase kinase 2, partial (72%)	SGN-U273316
MICRO.106.C2	0.716277	0.912959	1.8071	1.76674	0.825074	0.897658	0.936972	Group VI	AAF23892	pectin methyl esterase [Solanum tuberosum]	TC133645	UP|Q9SEE6_SOLTU (Q9SEE6) Pectin methyl esterase , complete	SGN-U270090
MICRO.10592.C1	0.290714	1.62824	1.01765	0.989068	1.00708	3.33278	1.0923	Group II	ABO82624	Midasin , related [Medicago truncatula]	TC162028	similar to UP|Q5D8K9_SCHJA (Q5D8K9) SJCHGC02785 protein, partial (12%)	SGN-U284638
MICRO.10580.C4	0.792741	0.872146	1.11533	1.65475	0.819506	2.07193	1.19055	Group VI	CAI62049	UDP-xylose phenolic glycosyltransferase [Solanum lycopersicum]	TC154759	similar to UP|Q5CAZ5_LYCES (Q5CAZ5) UDP-xylose phenolic glycosyltransferase, partial (38%)	SGN-U290447
MICRO.1056.C1	0.550437	0.909333	0.981318	0.97223	0.59213	2.09976	0.937114	Group II	ABE85742	Porin, eukaryotic type [Medicago truncatula]	TC142607	similar to RF|NP_188634.1|15231008|NM_112890 TOM40; voltage-gated ion-selective channel {Arabidopsis thaliana} (exp=-1; wgp=0; cg=0), partial (89%)	SGN-U270191
MICRO.10552.C1	0.424338	0.615851	1.06449	1.03379	1.18695	1.05997	0.928338	Group III	ABE79614	Adenosine/AMP deaminase active site [Medicago truncatula]	TC142296	similar to UP|Q56XX1_ARATH (Q56XX1) AMP deaminase like protein, partial (22%)	SGN-U280435
MICRO.10546.C1	1.17453	0.583372	1.09065	0.858889	1.50709	3.57185	0.989529	Group I	AAL29212	putative acyl-CoA synthetase [Capsicum annuum]	TC142886	similar to UP|Q9SMT7_ARATH (Q9SMT7) 4-coumarate-CoA ligase-like protein (Adenosine monophosphate binding protein 3 AMPBP3), partial (82%)	SGN-U273689
MICRO.10544.C1	1.25959	0.662857	1.54453	1.25576	1.19475	3.21115	1.14468	Group I	BAF44533	class IV chitinase [Nicotiana tabacum]	TC140634	similar to UP|Q7XAU6_VITVI (Q7XAU6) Class IV chitinase, partial (91%)	SGN-U274534
MICRO.10537.C1	1.75353	0.616051	1.16979	1.1901	0.513286	0.868701	0.899918	Group V	AAS80139	arachidonic acid-induced DEA1 [Lycopersicon esculentum]	TC158904	UP|Q6EAL9_LYCES (Q6EAL9) Arachidonic acid-induced DEA1, complete	SGN-U271014
MICRO.10534.C1	0.544974	0.583124	1.04465	0.971574	0.92612	0.811242	1.4709	Group III	AAC02213	ethylene receptor homolog [Lycopersicon esculentum]	TC144224	homologue to GB|AAC02213.1|2852991|AF043084 ethylene receptor homolog {Lycopersicon esculentum} (exp=-1; wgp=0; cg=0), partial (33%)	SGN-U279381
MICRO.1052.C7	0.682658	1.52961	0.785852	1.19041	0.812422	1.93291	1.14354	Group II	NA	NA	TC143087		SGN-U287421
MICRO.1052.C3	0.844091	1.6421	0.793986	1.03932	0.721573	2.77269	1.19042	Group II	NA	NA	TC160122		SGN-U269488
MICRO.1052.C10	0.157597	0.800679	1.46076	2.04368	1.66705	1.49278	1.06919	Group III	NA	NA	CN216775	similar to PIR|A57013|A57013 early endosome antigen 1 - human {Homo sapiens;}, partial (0%)	SGN-U287415
MICRO.10505.C1	0.83385	0.442577	0.977518	1.11954	1.03037	1.8055	0.609407	Group III	EAZ35920	hypothetical protein OsJ_019403 [Oryza sativa (japonica cultivar-group)]	TC148979	weakly similar to UP|Q2QLI9_ORYSA (Q2QLI9) Crocetin dialdehyde, partial (9%)	SGN-U277115
MICRO.10504.C1	1.11731	1.06345	1.1664	0.891317	1.85867	0.714219	1.60994	Group IV	NP_566554	catalytic/ protein phosphatase type 2C [Arabidopsis thaliana]	TC144382	weakly similar to GB|AAP68303.1|31711894|BT008864 At3g16560 {Arabidopsis thaliana} (exp=-1; wgp=0; cg=0), partial (51%)	SGN-U274052
MICRO.105.C1	0.438528	1.86425	1.11887	1.49297	0.58781	0.449171	0.438017	Group V	NP_195053	CDC20.1; signal transducer [Arabidopsis thaliana]	TC147880	similar to UP|Q9SZA4_ARATH (Q9SZA4) WD-repeat protein-like protein, partial (58%)	SGN-U270301
MICRO.10499.C3	1.49525	0.920214	1.60228	1.53547	0.85851	2.26059	0.979544	Group VI	ABA40464	unknown [Solanum tuberosum]	TC139942		SGN-U271333
MICRO.10499.C1	1.88696	1.10526	2.83239	1.74629	0.75583	1.7519	0.999518	Group VI	ABA40464	unknown [Solanum tuberosum]	TC143972	similar to UP|Q9LTE3_ARATH (Q9LTE3) Emb|CAA71173.1, partial (35%)	SGN-U271333
MICRO.10466.C2	1.17836	0.734688	1.40626	1.51826	1.05428	2.80947	1.61755	Group VI	AAG17825	inositol polyphosphate 5-phosphatase II [Arabidopsis thaliana]	TC156201	similar to GB|AAG17825.1|10444263|AF289634 inositol polyphosphate 5-phosphatase II {Arabidopsis thaliana} (exp=-1; wgp=0; cg=0), partial (6%)	SGN-U291085
MICRO.1046.C1	0.99707	1.24822	1.22558	2.50477	1.51141	1.86012	0.868626	Group VIII	NA	NA	TC157893	homologue to UP|Q09082_LYCES (Q09082) Extensin (Class I), partial (20%)	SGN-U269013
MICRO.10449.C1	1.81319	0.950669	3.79485	2.68006	0.834622	0.831226	1.51302	Group VI	AAC62620	unknown [Nicotiana tabacum]	TC146481		SGN-U272273
MICRO.10445.C1	1.47666	0.814475	3.43576	3.47278	1.04953	0.702035	1.62713	Group VI	NP_568279	unknown protein [Arabidopsis thaliana]	TC160181		SGN-U277173
MICRO.10444.C1	0.977744	0.687291	2.7735	3.2515	1.00464	0.74364	1.76518	Group VI	ABE66154	fringe-like protein [Arabidopsis thaliana]	TC148610	weakly similar to RF|NP_565869.1|18404516|NM_129329 transferase, transferring glycosyl groups {Arabidopsis thaliana} (exp=-1; wgp=0; cg=0), partial (7%)	SGN-U285992
MICRO.10440.C1	1.23908	0.724738	1.91202	1.24117	1.16055	3.5746	1.04203	Group I	AAC15780	Cf-2.2 [Lycopersicon pimpinellifolium]	TC143369	similar to UP|Q41398_LYCPM (Q41398) Cf-2.2, partial (29%)	SGN-U281941
MICRO.10427.C3	0.835346	1.19505	1.29164	1.01811	2.05929	0.582967	0.506144	Group V	NP_181812	PDF1 (PROTODERMAL FACTOR 1) [Arabidopsis thaliana]	TC155144	similar to UP|Q9S728_ARATH (Q9S728) En/Spm-like transposon protein (At2g42840) (Protodermal factor 1), partial (56%)	SGN-U274656
MICRO.10406.C1	0.959616	0.954826	0.988932	0.58411	0.652589	1.46333	1.01087	Group II	NP_001058332	Os06g0671700 [Oryza sativa (japonica cultivar-group)]	TC147558	similar to UP|Q9SA83_ARATH (Q9SA83) T5I8.13, partial (5%)	SGN-U282062
MICRO.10369.C1	0.777609	0.955036	1.50084	3.26743	0.963026	0.575768	0.976253	Group VIII	CAA06997	subtilisin-like protease [Solanum lycopersicum]	TC145463	similar to UP|O82777_LYCES (O82777) Subtilisin-like protease, partial (20%)	SGN-U277636
MICRO.10331.C1	1.00395	1.07581	0.89519	0.930113	1.65118	0.779739	1.78162	Group IV	CAA46942	ferredoxin--nitrite reductase [Nicotiana tabacum]	TC155512	homologue to UP|Q04032_TOBAC (Q04032) Ferredoxin--nitrite reductase (Fragment) , partial (16%)	SGN-U284154
MICRO.10328.C1	1.0631	0.631523	2.49056	2.52075	0.949964	1.03073	1.2177	Group VI	NP_001065897	Os11g0181100 [Oryza sativa (japonica cultivar-group)]	TC158457	similar to GB|AAL48237.1|17933310|AF446365 At1g10950/T19D16_13 {Arabidopsis thaliana} (exp=-1; wgp=0; cg=0), partial (16%)	SGN-U286065
MICRO.10323.C1	1.11111	0.82697	1.54349	1.64602	1.28571	1.41321	1.10388	Group VI	NP_001064013	Os10g0101000 [Oryza sativa (japonica cultivar-group)]	TC136015	weakly similar to GB|AAC53334.1|2367671|AF016583 Chk1 {Mus musculus} (exp=-1; wgp=0; cg=0), partial (7%)	SGN-U291490
MICRO.10314.C1	2.01777	1.22219	1.11365	1.13704	1.42969	1.74571	0.793645	Group I	BAA95789	KED [Nicotiana tabacum]	TC160979	similar to UP|Q9LW95_TOBAC (Q9LW95) KED, partial (22%)	SGN-U278860
MICRO.10309.C3	0.97099	1.02069	0.97044	0.659323	0.446312	2.59678	1.10268	Group II	NP_001060964	Os08g0139000 [Oryza sativa (japonica cultivar-group)]	TC142895	similar to RF|NP_200269.1|15239676|NM_124838 RNA binding {Arabidopsis thaliana} (exp=-1; wgp=0; cg=0), partial (55%)	SGN-U272991
MICRO.10308.C2	1.06124	0.398954	1.62296	0.794683	1.23579	1.71162	1.48342	Group I	CAA59450	twi1 [Solanum lycopersicum]	TC142606	homologue to UP|Q43526_LYCES (Q43526) Twi1 protein (Fragment), complete	SGN-U281920
MICRO.1030.C3	0.658733	1.13488	0.938395	0.65982	0.697572	1.19186	0.933781	Group III	NP_563961	CPN10 (CHAPERONIN 10) [Arabidopsis thaliana]	TC156792	similar to UP|CH10_ARATH (P34893) 10 kDa chaperonin (Protein CPN10) (Protein groES), partial (98%)	SGN-U271437
MICRO.10284.C1	1.43385	0.658799	0.989735	1.08794	1.23025	0.631174	1.01968	Group IV	NA	NA	TC141360	similar to UP|Q5BW32_SCHJA (Q5BW32) SJCHGC01975 protein (Fragment), partial (7%)	SGN-U276422
MICRO.1026.C7	0.71535	1.22887	0.993342	0.837949	0.220707	0.45724	1.04826	Group V	NP_189372	DNA binding [Arabidopsis thaliana]	TC152793	UP|Q76MV0_TOBAC (Q76MV0) H3 histone, partial (88%)	SGN-U287484
MICRO.1026.C5	0.93153	1.35795	0.912619	0.820755	0.210941	0.519516	1.0776	Group V	XP_854287	PREDICTED: similar to histone 1, H2ai (predicted) [Canis familiaris]	TC146193	UP|Q76MV0_TOBAC (Q76MV0) H3 histone, partial (96%)	SGN-U269630
MICRO.1026.C4	0.892274	1.13504	1.04552	0.868405	0.22604	0.460924	1.09157	Group V	AAA32655	histone H3 (H3-1.1)	TC148374	UP|Q76MV0_TOBAC (Q76MV0) H3 histone, complete	SGN-U269630
MICRO.1026.C2	0.822925	1.09692	0.943796	0.947048	0.280249	0.391604	1.08529	Group V	CAL55839	Histones H3 and H4 (ISS) [Ostreococcus tauri]	TC145925	UP|Q76MV0_TOBAC (Q76MV0) H3 histone, complete	SGN-U269631
MICRO.10246.C1	1.24713	0.956066	1.62242	0.874335	1.16922	1.38808	1.68317	Group I	CAJ13709	glutathione S-transferase 12 [Capsicum chinense]	TC148520	weakly similar to UP|Q4LAW7_CAPCH (Q4LAW7) Glutathione S-transferase 12 , partial (66%)	SGN-U280125
MICRO.10236.C1	1.01945	1.1416	0.885747	0.637196	0.605857	1.53419	0.993048	Group II	NP_180938	binding / transporter [Arabidopsis thaliana]	TC145804	similar to UP|Q84UC7_ARATH (Q84UC7) Mitochondrial basic amino acid carrier, partial (30%)	SGN-U274451
MICRO.10206.C1	0.943483	1.07404	0.907045	1.53112	2.59202	0.515474	1.23307	Group VII	NP_567674	unknown protein [Arabidopsis thaliana]	TC160797	similar to UP|Q93ZQ5_ARATH (Q93ZQ5) AT4g22990/F7H19_170, partial (28%)	SGN-U280857
MICRO.10194.C1	0.509097	1.35963	0.933111	1.28425	0.850494	0.66665	0.945663	Group III	NP_196830	unknown protein [Arabidopsis thaliana]	TC157099		SGN-U269065
MICRO.10167.C1	0.955569	1.37749	0.857549	0.624572	0.611527	2.22984	0.778347	Group II	NP_200302	ATP binding / ATP-dependent helicase/ helicase/ nucleic acid binding [Arabidopsis thaliana]	TC145387	similar to UP|Q9FFT9_ARATH (Q9FFT9) RNA helicase-like protein, partial (17%)	SGN-U292837
MICRO.10094.C1	1.20874	0.983667	1.54138	0.28752	1.15578	0.241226	0.958686	Group IV	NP_001058938	Os07g0160300 [Oryza sativa (japonica cultivar-group)]	TC141813	weakly similar to UP|Q4AS14_9BURK (Q4AS14) AAA ATPase, central region, partial (3%)	SGN-U276786
MICRO.10092.C1	1.11608	1.16772	0.981875	0.626152	0.757012	0.669619	0.416603	Group V	AAF35897	pectin methylesterase isoform alpha [Vigna radiata]	TC147465	similar to UP|Q9M5J0_PHAAU (Q9M5J0) Pectin methylesterase isoform alpha (Fragment) , partial (48%)	SGN-U283762
MICRO.10091.C3	1.21032	0.974428	1.53155	1.24253	1.14585	2.84836	0.998958	Group I	BAA77358	DNA-binding protein NtWRKY3 [Nicotiana tabacum]	TC144897	similar to UP|Q9SXP4_TOBAC (Q9SXP4) DNA-binding protein NtWRKY3, partial (72%)	SGN-U285856
MICRO.10091.C2	0.96293	0.98589	1.86593	1.31034	1.17675	2.7075	0.848626	Group VI	BAA77358	DNA-binding protein NtWRKY3 [Nicotiana tabacum]	TC134116	similar to UP|Q9SXP4_TOBAC (Q9SXP4) DNA-binding protein NtWRKY3, partial (74%)	SGN-U285856
MICRO.10067.C1	1.01932	0.952382	0.962739	0.609775	0.574894	1.21422	1.11353	Group II	ABB55361	40S ribosomal protein S10-like [Solanum tuberosum]	TC158758	UP|Q2XPV4_SOLTU (Q2XPV4) 40S ribosomal protein S10-like, complete	SGN-U268633
MICRO.10027.C2	0.550746	0.911572	1.0439	0.533736	0.558456	2.80535	0.854513	Group II	AAR88094	notchless-like protein [Solanum chacoense]	TC160985		SGN-U293951
MICRO.10027.C1	0.659219	0.881986	1.05461	0.75608	0.604349	2.38836	0.894594	Group II	AAR88094	notchless-like protein [Solanum chacoense]	TC145325	UP|Q6EE07_SOLCH (Q6EE07) Notchless-like protein, partial (69%)	SGN-U275792
MICRO.1002.C1	0.566006	0.411885	1.06821	1.1134	1.54495	1.22141	1.20456	Group III	NP_568750	ERD1 (EARLY RESPONSIVE TO DEHYDRATION 1); ATP binding / ATPase/ nucleoside-triphosphatase/ nucleotide binding / protein binding [Arabidopsis thaliana]	TC162010	similar to UP|ERD1_ARATH (P42762) ERD1 protein, chloroplast precursor, partial (34%)	SGN-U272916
MICRO.10018.C1	1.35531	0.800667	1.42143	2.4424	1.13839	1.95086	0.928631	Group VI	NP_173910	kinase [Arabidopsis thaliana]	TC154718	similar to RF|NP_173910.1|15222572|NM_102350 kinase {Arabidopsis thaliana} (exp=-1; wgp=0; cg=0), partial (47%)	SGN-U273398
MICRO.10016.C1	0.588022	1.26084	0.868087	1.22024	0.591542	1.22115	0.873542	Group II	NA	NA	TC144466	UP|Q5EI16_GECJA (Q5EI16) GekBS135P, partial (9%)	SGN-U285989
MICRO.100.C1	0.965337	1.10344	0.658474	0.499964	1.3598	0.484752	0.465941	Group IV	CAD12664	viroid RNA-binding protein [Solanum lycopersicum]	TC136516	homologue to UP|Q8RVV4_LYCES (Q8RVV4) Viroid RNA-binding protein (Fragment), partial (71%)	SGN-U268561
cSTS9M3TH	0.599701	0.926257	0.87412	0.724018	0.449093	1.66109	0.970508	Group II	Q5YLB4	DNA gyrase subunit B, chloroplast/mitochondrial precursor	BG595027		SGN-U291665
cSTS30B11TH	1.06403	1.14931	1.01374	1.25558	2.59628	2.42093	0.205568	Group I	P37842	Multicystatin (MC)	BG600937	similar to SP|P37842|CYTM_SOLTU Multicystatin precursor (MC). {Solanum tuberosum;}, partial (30%)	SGN-U289637
cSTS28N11TH	0.462981	0.918806	1.0186	0.613367	0.744015	2.61795	1.24587	Group II	NP_567566	nucleotide binding [Arabidopsis thaliana]	BG600316	similar to GP|15912305|gb|AAL08286.1 AT4g18900/F13C5_70 {Arabidopsis thaliana}, partial (12%)	SGN-U273619
cSTS27K6TH	1.0943	1.0028	1.15291	0.651214	0.397185	6.73628	0.588325	Group II	CAA58003	xyloglucan endo-transglycosylase [Solanum lycopersicum]	BG600136	homologue to PIR|S57769|S49812 xyloglucan endo-1 4-beta-D-glucanase (EC 3.2.1.-) precursor (clone tXET-B1) - tomato, partial (45%)	SGN-U273562
cSTS26F10TH	0.903453	0.747065	1.60021	2.28941	1.3782	1.7938	0.936761	Group VI	ABE92379	Peptidase aspartic, active site [Medicago truncatula]	BG599946		SGN-U282531
cSTS15E22TH	0.544679	0.568487	1.10153	1.11885	0.911215	1.00327	1.36086	Group III	NP_567229	unknown protein [Arabidopsis thaliana]	TC159854	similar to UP|O81298_ARATH (O81298) T14P8.16 (AT4g02350 protein), partial (27%)	SGN-U294162
cSTS12H6TH	0.836057	1.5348	1.12624	1.52005	0.655054	0.403861	0.536949	Group V	BAA32827	98b [Daucus carota]	BG596120	similar to PIR|T14286|T14286 embryogenic callus protein 98b - carrot {Daucus carota;}, partial (40%)	SGN-U292522
cSTS10P23TH	1.69825	1.80591	1.20664	0.895113	1.63488	1.3126	0.698675	Group I	AAC49603	wound-inducible proteinase inhibitor I	BG595539	homologue to PIR|S66278|S66278 serine proteinase inhibitor - potato (fragment) {Solanum tuberosum;}, partial (63%)	SGN-U268400
cSTE23P13TH	0.347999	1.16928	0.741854	1.35544	0.433987	1.12731	0.925608	Group II	1718316A	granule-bound starch synthase	TC162866	homologue to GB|1718316A|228210|1718316A granule-bound starch synthase. {Solanum tuberosum} (exp=-1; wgp=0; cg=0), partial (29%)	SGN-U268332
cSTE1E1TH	0.701654	0.665772	1.04116	0.762937	0.994666	0.587604	1.10668	Group IV	BAF31234	beta-D-galactosidase [Persea americana]	BI176439	beta galactosidase {Vigna radiata}	SGN-U292380
cSTE18M23TH	0.36576	0.670328	1.00292	0.945714	1.0613	0.66012	1.05212	Group III	NP_200877	REV (REVOLUTA); DNA binding / lipid binding / transcription factor [Arabidopsis thaliana]	BI179320	homologue to UP|Q9SE43 (Q9SE43) Homeodomain-leucine zipper protein interfascicular fiberless 1 (REVOLUTA), partial (12%)	SGN-U292986
cSTD6F3TH	0.508347	0.587538	1.07487	0.971781	1.00112	1.09184	0.893476	Group III	AAX19057	class III HD-Zip protein 8 [Populus trichocarpa]	BG887627	similar to PIR|T10695|T10695 transcription factor HD-zip - Arabidopsis thaliana {Arabidopsis thaliana;}, partial (8%)	SGN-U291719
cSTD2G15TH	0.25763	0.907446	0.834683	0.578527	0.495893	4.50841	0.842038	Group II	BAE98823	hypothetical protein [Arabidopsis thaliana]	BG886830		SGN-U298912
cSTD1O5THB	2.16829	0.950068	0.918246	0.816929	2.36198	1.41684	0.399952	Group I	AAL60243	putative Kunitz-type tuber invertase inhibitor precursor [Solanum tuberosum]	BG886570		SGN-U280998
cSTD16E21TH	0.515013	0.656672	1.0834	0.893459	1.08775	1.37845	1.22851	Group I	NP_177613	ATP binding / damaged DNA binding [Arabidopsis thaliana]	BG889937		SGN-U293336
cSTD12L17TH	0.62032	0.705051	1.04108	0.862903	1.22354	0.57136	1.19889	Group III	AAC26113	fructose-6-phosphate 2-kinase/fructose-2,6-bisphosphatase [Solanum tuberosum]	TC161346	UP|O81398_SOLTU (O81398) Fructose-6-phosphate 2-kinase/fructose-2,6-bisphosphatase (Fragment) , complete	SGN-U276738
cSTD12E3TH	0.571396	0.77854	0.988362	0.920077	0.939227	0.488407	1.1274	Group III	CAA07638	w-3 desaturase [Solanum tuberosum]	TC143233	UP|O82068_SOLTU (O82068) W-3 desaturase, complete	SGN-U269726
cSTD11G2TH	0.647581	0.798639	1.01926	1.32247	1.22463	0.591336	1.45199	Group III	NP_567759	VTC2 (VITAMIN C DEFECTIVE 2) [Arabidopsis thaliana]	TC137886	similar to GB|AAP31933.1|30387535|BT006589 At4g26850 {Arabidopsis thaliana} (exp=-1; wgp=0; cg=0), partial (83%)	SGN-U268513
cSTD10D19TH	0.631873	1.20212	0.930172	0.946352	0.868313	0.613214	0.764992	Group III	AAD28760	membrane related protein CP5 [Arabidopsis thaliana]	BG888529		SGN-U280922
cSTB47E1TH	0.696331	0.577381	0.926211	1.00784	1.27847	0.537185	1.47017	Group IV	P37142	Bifunctional aspartokinase/homoserine dehydrogenase, chloroplast precursor (AK-HD) (AK-HSDH) [Includes: Aspartokinase ; Homoserine dehydrogenase ]	BG097493	similar to PIR|T06246|T06246 aspartate kinase () / homoserine dehydrogenase () precursor - soybean (fragment) {Glycine max;}, partial (11%)	SGN-U293267
cSTB47D16TH	0.764262	1.4753	1.2746	2.01036	1.16191	0.498846	0.643226	Group VIII	Q9S8M0	Chitin-binding lectin 1 precursor (PL-I)	BG097665	similar to SP|P29059|CHI3_TOBAC Endochitinase 3 precursor (). {Nicotiana tabacum;} (EC 3.2.1.14 EC 3.2.1.14 EC 3.2.1.14), partial (14%)	SGN-U294575
cSTB46N2TH	0.474553	0.542966	1.0403	1.31049	0.859745	0.684235	1.4729	Group III	AAO49411	MYB2 [Dendrobium sp. XMW-2002-2]	BG097457	homologue to UP|Q84U52 (Q84U52) MYB2, partial (22%)	SGN-U296365
cSTB45O13TH	0.5299	0.621105	0.675759	1.0476	1.11639	1.11392	0.775328	Group III	NP_190421	CYP94B3; heme binding / iron ion binding / monooxygenase/ oxygen binding [Arabidopsis thaliana]	BG096885	weakly similar to PIR|T46196|T46196 cytochrome P450-like protein - Arabidopsis thaliana {Arabidopsis thaliana;}, partial (30%)	SGN-U279667
cSTB45K22TH	1.15014	2.11331	1.09632	1.51942	0.719098	0.454702	0.558306	Group V	ABE66125	hypothetical protein At5g01910 [Arabidopsis thaliana]	BG096955		SGN-U294145
cSTB45J8TH	0.627777	0.949593	1.05444	1.16254	0.653379	1.10527	1.0061	Group III	NP_680393	ATP binding / DNA binding / DNA-dependent ATPase [Arabidopsis thaliana]	BG097104	similar to UP|Q8H1A3 (Q8H1A3) Mini-chromosome maintenance protein MCM6, partial (11%)	SGN-U297391
cSTB44J7TH	0.453287	1.40376	0.999563	1.51702	1.88697	0.855401	0.94234	Group III	YP_635647	ribulose-1,5-bisphosphate carboxylase/oxygenase large subunit [Solanum tuberosum]	TC132835	UP|RBL_SOLTU (P25079) Ribulose bisphosphate carboxylase large chain precursor (RuBisCO large subunit) , complete	SGN-U293506
cSTB43P8TH	0.454451	0.575981	1.00782	1.15618	1.11066	0.700159	1.16907	Group III	NP_001053859	Os04g0613900 [Oryza sativa (japonica cultivar-group)]	BG096563	similar to SP|O64769|PT11_ARATH Potassium transporter 11 (AtPOT11). {Arabidopsis thaliana;}, partial (17%)	SGN-U291648
cSTB43H3TH	0.479148	0.966767	0.868719	1.07151	0.837867	0.569538	0.997223	Group III	AAK93632	putative growth regulator protein [Arabidopsis thaliana]	BG096446		SGN-U292022
cSTB43F4TH	1.06201	0.845414	0.865844	0.470215	1.4157	0.39222	0.523466	Group IV	Q9ZSK5	Zeatin O-glucosyltransferase (Trans-zeatin O-beta-D-glucosyltransferase)	BG096508		SGN-U273695
cSTB43E2TH	0.662538	0.786277	0.875651	1.03394	0.979532	0.613932	0.988027	Group III	CAA67430	SBT2 [Solanum lycopersicum]	BG096359	homologue to PIR|T07172|T07172 subtilisin-like proteinase () 2 - tomato {Lycopersicon esculentum;} (EC 3.4.21.-), partial (21%)	SGN-U294021
cSTB43A11TH	1.23376	0.957051	1.05968	1.21893	1.16465	0.432819	0.611055	Group V	NP_001061768	Os08g0405700 [Oryza sativa (japonica cultivar-group)]	BG096270		SGN-U282359
cSTB42P10TH	0.70689	0.982346	1.1535	1.50154	1.07243	1.6779	0.950244	Group VI	ABE85685	Cyclin-like F-box [Medicago truncatula]	BG096259		SGN-U295273
cSTB40C3TH	0.561561	0.83468	0.924663	1.32335	0.748503	0.618369	1.00102	Group III	BAC83870	putative 6-phosphogluconolactonase [Oryza sativa (japonica cultivar-group)]	BF054522		SGN-U298501
cSTB36I1TH	0.789354	0.567995	0.955949	0.698064	0.875225	0.641339	1.25369	Group IV	NA	NA	BF053478		SGN-U294092
cSTB36H8TH	0.586812	1.48007	1.00412	1.09597	0.927442	0.541449	0.762009	Group III	ABO83516	Sucrose synthase; N-6 Adenine-specific DNA methylase [Medicago truncatula]	BF053696		SGN-U298478
cSTB33F2TH	0.497884	0.670883	1.01888	0.940847	0.768263	1.41471	0.473074	Group III	CAA07060	SBT4C protein [Solanum lycopersicum]	BF052958	similar to UP|Q9ZS43 (Q9ZS43) SBT4C protein, partial (12%)	SGN-U296573
cSTB2E22TV	0.707958	1.1323	0.991528	0.564639	0.451528	2.0129	0.982389	Group II	NP_001056181	Os05g0540300 [Oryza sativa (japonica cultivar-group)]	BE919666	similar to GB|AAM19824.1|20453166|AY AT3g13860/MCP4_7 {Arabidopsis thaliana;}, partial (14%)	SGN-U294010
cSTB29K16TH	0.814676	0.591569	1.08279	1.15337	1.10973	0.319766	0.824775	Group IV	AAR87711	salicylic acid-binding protein 2 [Nicotiana tabacum]	BE924354	similar to UP|AAR87711 (AAR87711) Salicylic acid-binding protein 2, partial (59%)	SGN-U288732
cSTB29A11TH	1.09915	0.50985	1.38352	1.09939	2.35781	3.31079	0.246714	Group I	AAV36809	arginase 2 [Lycopersicon esculentum]	BE924235	similar to SP|P46637|ARG1_ARATH Arginase (). {Arabidopsis thaliana;} (EC 3.5.3.1 EC 3.5.3.1), partial (47%)	SGN-U270638
cSTB27D1TH	0.877651	0.926551	1.09405	0.663476	0.970951	0.596317	0.664238	Group IV	BAC43164	GPI-anchored protein [Arabidopsis thaliana]	BE923834	weakly similar to UP|Q8GWY1 (Q8GWY1) GPI-anchored protein (At1g80080), partial (30%)	SGN-U290982
cSTB23O1TH	0.882572	1.10185	0.797425	0.582631	0.301539	1.39971	0.903626	Group II	AAF91282	DNA-binding protein p24 [Solanum tuberosum]	TC138436	UP|Q9LL85_SOLTU (Q9LL85) DNA-binding protein p24, complete	SGN-U273350
cSTB23K11TH	1.1667	1.12854	1.06808	0.710312	2.663	4.21904	0.206519	Group I	P37842	Multicystatin (MC)	TC155607	UP|CYTM_SOLTU (P37842) Multicystatin (MC), complete	SGN-U289636
cSTB1L9TV	1.86299	1.19052	1.58567	0.870797	3.22676	0.857571	0.169914	Group I	BAA95409	DIP-1 [Citrullus lanatus]	TC154020	similar to RF|NP_193517.3|42566909|NM_117892 metallopeptidase {Arabidopsis thaliana} (exp=-1; wgp=0; cg=0), partial (97%)	SGN-U270247
cSTB1L11TV	0.929759	0.588485	1.01305	0.594247	2.08647	0.804908	1.01925	Group IV	AAM73656	AER [Nicotiana tabacum]	BE919496		SGN-U294914
cSTB18N7TH	0.681849	1.51308	0.997825	1.25953	0.605633	0.197537	0.765501	Group V	NA	NA	BE922282		SGN-U287681
cSTB17A8TH	1.09796	0.619945	1.06388	0.839893	0.647767	0.646366	0.814286	Group V	AAV87156	MKS1 [Lycopersicon hirsutum f. glabratum]	BE921905		SGN-U290551
cSTB16M21TH	0.782983	0.629237	1.09949	0.923133	1.09976	0.317713	0.991217	Group IV	NP_564430	carboxylic ester hydrolase/ hydrolase, acting on ester bonds [Arabidopsis thaliana]	BE921736		SGN-U290047
cSTB14M8TH	1.99594	0.901726	1.0516	0.846843	1.27207	1.86756	1.20748	Group I	NA	NA	BE921556	SP|Q9C7I3|M168_ARATH MLP-like protein 168. {Arabidopsis thaliana;}, partial (7%)	SGN-U299105
cSTB12G1TH	1.43292	1.67275	0.922234	0.884779	0.396635	0.541832	1.13331	Group V	NA	NA	BE921173		SGN-U290953
cSTB11H6TH	0.561813	1.06783	0.9572	0.746075	0.470866	0.665544	0.932326	Group III	ABO78033	Uroporphyrinogen decarboxylase (URO-D) [Medicago truncatula]	TC136183	similar to UP|Q93ZB6_ARATH (Q93ZB6) AT3g14930/K15M2_7, partial (81%)	SGN-U271750
cSTA5L13TH	0.694093	0.739078	2.25463	1.60635	1.09916	3.10474	1.10157	Group VI	EAK90720	hypothetical protein CaO19.63 [Candida albicans SC5314]	AW907008	putative mitochondrial protein {Arabidopsis thaliana}GP|13877697|gb|AAK43926.1|AF370607_1|AF370607	SGN-U296014
cSTA5C5TH	0.534412	0.789419	1.01246	1.03342	1.16848	0.593212	0.988143	Group III	AAC62241	endo-1,4-beta-glucanase [Lycopersicon esculentum]	AW906934	homologue to UP|O82473 (O82473) Endo-1 4-beta-glucanase () (EC 3.2.1.4), partial (37%)	SGN-U291007
cSTA4J15TH	0.372007	0.86109	0.866076	0.8781	0.410493	3.26897	1.11266	Group II	CAH67975	OSIGBa0142I02-OSIGBa0101B20.18 [Oryza sativa (indica cultivar-group)]	AW906825	weakly similar to UP|Q8L830 (Q8L830) WD40-repeat protein (Fragment), partial (18%)	SGN-U291221
cSTA44E6TH	0.234878	0.897111	1.00566	0.863561	0.665727	1.51445	0.846125	Group III	BAD13764	exo-1,3-beta-glucanase [Lilium longiflorum]	BF188340	weakly similar to PIR|T10521|T10521 beta-glucosidase () - common nasturtium {Tropaeolum majus;} (EC 3.2.1.21 EC 3.2.1.21), partial (14%)	SGN-U295827
cSTA36D3TH	0.514324	0.915186	0.946405	0.916807	0.422143	1.02027	1.16793	Group III	AAK76703	unknown protein [Arabidopsis thaliana]	BE473229		SGN-U297873
cSTA35G13TH	0.319783	1.35867	1.08625	1.49894	1.59639	0.65699	0.941299	Group III	NA	NA	BE472828		SGN-U283157
cSTA2B5TH	0.436981	0.483321	1.0856	1.154	1.08467	0.888976	1.78119	Group III	ABE88271	Armadillo [Medicago truncatula]	AW906189		SGN-U292662
cSTA29A10TH	0.616806	0.969026	1.21842	1.13654	0.601623	0.462252	0.572661	Group V	CAB46641	cyclin A1 [Solanum lycopersicum]	BE471478	similar to PIR|T02966|T02966 cyclin A-type (clone 19) - common tobacco {Nicotiana tabacum;}, partial (5%)	SGN-U290255
cSTA24J21TH	0.532703	0.827448	0.947232	0.713859	0.647044	0.867901	1.09173	Group III	AAT11924	plastid-dividing ring protein [Solanum tuberosum]	TC147086	UP|Q6J4T5_SOLTU (Q6J4T5) Plastid-dividing ring protein, complete	SGN-U284323
cSTA23L3TH	0.62167	0.738326	0.848358	0.999334	1.09408	0.343432	1.22102	Group III	NP_195577	hydrolase, hydrolyzing O-glycosyl compounds [Arabidopsis thaliana]	BE343264	similar to UP|Q84VX1 (Q84VX1) At4g38650, partial (9%)	SGN-U293103
cSTA20N20TH	0.152062	1.05021	1.30834	1.71303	1.76748	0.98596	1.35055	Group III	AAD09518	NTGP4 [Nicotiana tabacum]	BE342699	NTGP4 {Nicotiana tabacum}	SGN-U288751
cSTA17E22TH	0.372038	1.06214	1.23674	1.61321	2.00051	0.944868	1.15225	Group III	NP_190474	calmodulin binding / triacylglycerol lipase [Arabidopsis thaliana]	TC162965	weakly similar to GB|AAC13622.1|3047111|F6N23 {Arabidopsis thaliana} (exp=0; wgp=1; cg=0), partial (55%)	SGN-U297573
cSTA14I13TH	0.486832	0.633607	1.25403	1.47141	1.91392	1.43625	1.01862	Group III	NP_001048743	Os03g0114300 [Oryza sativa (japonica cultivar-group)]	BE341091		SGN-U277652
cPRO7A1TH	0.839816	1.2491	0.978147	0.790943	0.580313	0.539748	0.972317	Group V	P35057	Histone H4	TC162308	GB|AAB94924.1|2746721|AF038387 histone H4 {Capsicum annuum} (exp=-1; wgp=0; cg=0), complete	SGN-U268358
cPRO31D11TH	0.856419	0.889317	1.54666	2.08824	0.701877	1.66861	1.218	Group VI	AAR29980	sterol delta-7 reductase [Tropaeolum majus]	TC154172	similar to UP|Q6S5A3_TROMA (Q6S5A3) Sterol delta-7 reductase, partial (37%)	SGN-U273522
cPRO27N4TH	1.02661	0.967407	1.09788	0.621843	1.41826	0.359627	1.05796	Group IV	AAD25541	fructose-1,6-bisphosphatase precursor [Solanum tuberosum]	BM406492	similar to UP|Q9XF82 (Q9XF82) Fructose-1 6-bisphosphatase () (EC 3.1.3.11), partial (38%)	SGN-U296625
cPRO27I11TH	0.953146	1.14104	0.898614	0.741372	1.14769	0.615341	0.560565	Group IV	CAA10134	basic blue copper protein [Cicer arietinum]	TC162941		SGN-U275835
cPRO26I17TH	0.323754	1.2778	1.15862	1.73429	1.5692	0.947163	1.13587	Group III	AAN85431	hemoglobin [Solanum tuberosum]	TC138719	UP|Q8GV42_SOLTU (Q8GV42) Hemoglobin, complete	SGN-U269550
cPRO22G24TH	0.637905	0.662706	0.994592	1.39868	1.35265	0.682206	0.961066	Group IV	NP_177538	ATP binding / adenylate cyclase/ kinase/ uridine kinase [Arabidopsis thaliana]	BM404926		SGN-U291312
cPRO14L24TH	0.787116	0.655604	1.19486	1.40687	0.797184	0.629657	1.26526	Group IV	EAZ15034	hypothetical protein OsJ_004859 [Oryza sativa (japonica cultivar-group)]	BM404173	UP|Q9FS27 (Q9FS27) Cytosolic cysteine synthase, partial (42%)	SGN-U271284
cPRO10B11TH	0.618444	0.577303	1.08533	0.848804	1.11442	0.720839	1.01479	Group IV	AAT37528	purple acid phosphatase 3 [Solanum tuberosum]	BM111171		SGN-U272147
BPLI5I11TH	1.29256	0.878867	2.1734	2.26399	1.1391	1.20824	1.03184	Group VI	AAX83943	Sgt1b [Capsicum annuum]	BG590437	homologue to UP|Q84UV7 (Q84UV7) SGT1, partial (14%)	SGN-U270101
BPLI4N10TH	1.82652	0.876878	9.29811	2.96115	0.645728	0.990304	1.63146	Group VI	NA	NA	TC141892	similar to UP|Q9M6E0_TOBAC (Q9M6E0) DNA-binding protein 4 (Fragment), partial (40%)	SGN-U270285
BPLI4L3TH	0.772125	0.933165	0.795547	1.52274	1.70368	0.593631	1.04279	Group VII	CAA12355	hypothetical protein [Solanum tuberosum]	TC134206		SGN-U269306
BPLI4F10TH	0.586287	0.919033	0.96118	0.700367	0.617375	1.5696	1.14292	Group II	ABJ97690	EBP1 [Solanum tuberosum]	BG590344		SGN-U269538
BPLI4D8TH	0.595977	0.645873	1.1344	1.3312	1.36325	0.843283	0.660341	Group III	ABD28596	Protein of unknown function DUF6, transmembrane [Medicago truncatula]	BG590333	weakly similar to UP|Q84TV1 (Q84TV1) Nodulin-like protein, partial (6%)	SGN-U297788
BPLI3N3TH	1.0981	0.782268	1.39003	1.52313	1.49097	1.86059	0.779309	Group VI	ABE80888	Glycosyl transferase, family 8 [Medicago truncatula]	BG590001	similar to UP|O23503 (O23503) DNA chromosome 4 ESSA I CONTIG fragment NO. 6 (Glucosyltransferase like protein), partial (22%)	SGN-U292167
BPLI16E1TH	1.31027	0.791494	1.94985	0.872786	1.5105	2.46177	0.91361	Group I	P07920	1-aminocyclopropane-1-carboxylate oxidase 2 (ACC oxidase 2) (Ethylene-forming enzyme) (EFE) (Protein GTOMA)	BQ046868	homologue to SP|P07920|ACC2_LYCES 1-aminocyclopropane-1-carboxylate oxidase 2 () (ACCoxidase 2) (Ethylene-forming enzyme) (EFE), partial (54%)	SGN-U297857
BPLI15D8TH	0.837948	1.14502	0.92215	1.20274	0.347145	0.609655	0.892398	Group V	P25469	Histone H2A.1 (LeH2A-1)	BQ046779	homologue to SP|P25469|H2A_LYCES Histone H2A. {Lycopersicon esculentum;}, complete	SGN-U287749
BPLI14P23TH	1.5262	0.847133	1.02056	0.399646	1.74751	2.18512	0.494168	Group I	CAA29022	PR-1b protein [Nicotiana tabacum]	BQ046433	similar to GB|CAA31009.1|19948|NTPR1 PR1b preprotein {Nicotiana tabacum;}, partial (54%)	SGN-U291879
BF_TUBSXXXX_0065E04_T3M.SCF	1.7706	1.47167	0.855755	1.00271	0.679721	2.21165	0.772333	Group I	NA	NA	CV477120		SGN-U294496
BF_TUBSXXXX_0062D04_T3M.SCF	0.998156	1.06264	0.933708	0.745676	0.179113	0.457385	1.38512	Group V	NA	NA	CV477849		SGN-U269630
BF_TUBSXXXX_0056B12_T3M.SCF	0.794371	1.3076	0.981421	1.03477	0.176225	0.378945	1.21959	Group V	AAA33907	histone 3	TC149263	UP|Q76MV0_TOBAC (Q76MV0) H3 histone, complete	SGN-U274083
BF_TUBSXXXX_0051C08_T3M.SCF	0.865793	0.64936	1.16704	1.25443	0.675073	2.06977	2.76824	Group III	NP_180763	N-acetyltransferase [Arabidopsis thaliana]	TC135222	homologue to UP|CB23_LYCES (P27489) Chlorophyll a-b binding protein 13, chloroplast precursor (LHCII type III CAB-13), partial (97%)	SGN-U269118
BF_TUBSXXXX_0048A10_T3M.SCF	0.212314	1.08983	1.34466	1.53954	1.57938	1.01987	1.06831	Group III	NA	NA	CV476536		SGN-U291161
BF_TUBSXXXX_0038D02_T3M.SCF	0.640031	0.847916	1.0547	1.13316	1.15559	0.274492	1.10289	Group III	NA	NA	CV475764		SGN-U268613
BF_TUBSXXXX_0037F05_T3M.SCF	1.22297	1.10484	0.981271	0.659562	0.598915	1.91115	0.88197	Group II	NA	NA	TC140333	homologue to UP|RS11_SOYBN (P17093) 40S ribosomal protein S11, complete	SGN-U268695
BF_TUBSXXXX_0034H11_T3M.SCF	0.791028	0.578701	1.18515	1.20355	1.16239	1.16199	0.611487	Group III	NA	NA	CV475492		SGN-U269931
BF_TUBSXXXX_0018F08_T3M.SCF	1.99134	1.09593	0.880179	0.824935	0.957209	1.75569	1.07381	Group I	NA	NA	CV474196		SGN-U289169
BF_TUBSXXXX_0017B01_T3M.SCF	2.1044	0.821874	0.609851	0.70572	1.85139	2.47515	0.262312	Group I	NA	NA	CV474327		SGN-U281139
BF_TUBSXXXX_0012H10_T3M.SCF	0.932201	0.98486	1.6334	1.85855	1.19035	1.25534	1.23157	Group VI	NA	NA	CV473715		SGN-U286092
BF_TUBSXXXX_0007G11_T3M.SCF	0.906631	0.567428	1.24764	0.851566	1.33188	0.493934	1.02704	Group IV	NA	NA	CV473332		SGN-U290355
bf_swstxxxx_016e11.t3m.scf	0.617743	1.1517	1.00371	0.970444	0.530517	1.06427	1.03713	Group II	NP_187873	EMB2742; CTP synthase/ catalytic [Arabidopsis thaliana]	CK717548		SGN-U274632
bf_swstxxxx_013c09.t3m.scf	0.592645	0.882987	0.995105	0.856237	0.927783	0.586274	1.1746	Group III	NA	NA	CK717280		SGN-U292592
bf_swstxxxx_0048e10.t3m.scf	1.65622	1.52121	0.870953	0.877518	1.48926	0.521067	1.5364	Group V	NA	NA	CK720111		SGN-U296457
bf_swstxxxx_0043c01.t3m.scf	0.65015	0.99058	1.00984	0.677801	0.596897	1.60302	0.947091	Group II	NA	NA	CK719681		SGN-U270558
bf_swstxxxx_0034a05.t3m.scf	0.883408	0.957903	1.12086	0.639411	0.529434	2.2326	0.922372	Group II	NA	NA	TC144605	similar to UP|Q8VXU5_ARATH (Q8VXU5) AT3g53630/F4P12_330, partial (57%)	SGN-U285018
bf_swstxxxx_0032b08.t3m.scf	0.567227	1.69634	1.22852	1.4291	0.881782	0.899796	0.39794	Group V	ABE88165	TPR repeat [Medicago truncatula]	CK718798	similar to PIR|T45759|T45759 MS5-like protein - Arabidopsis thaliana {Arabidopsis thaliana;}, partial (8%)	SGN-U295799
bf_swstxxxx_0006e12.t3m.scf	1.05671	1.46128	1.0418	0.593314	0.400639	3.50599	0.749884	Group II	NA	NA	CK716731	similar to UP|Q8TA74 (Q8TA74) Ryanodine receptor, partial (0%)	SGN-U295033
bf_suspxxxx_0064c10.t3m.scf	0.665265	1.60207	0.777791	1.00894	0.484009	1.11874	0.951664	Group II	NP_187084	EMB2458; ATP binding / ATPase/ metalloendopeptidase/ nucleoside-triphosphatase/ nucleotide binding [Arabidopsis thaliana]	CV435535		SGN-U272295
bf_suspxxxx_0064b12.t3m.scf	0.804609	1.03933	0.881134	1.51951	0.532223	1.4111	1.50276	Group III	ABJ91223	CBL-interacting protein kinase 16 [Populus trichocarpa]	CV435525		SGN-U279337
bf_suspxxxx_0062g11.t3m.scf	0.79133	0.816991	1.13094	1.3191	1.64408	1.98349	1.57069	Group I	AAK62600	AT3g62770/F26K9_200 [Arabidopsis thaliana]	CV435405		SGN-U281869
bf_suspxxxx_0062e12.t3m.scf	0.913278	0.913563	2.14604	1.91442	0.84964	1.0341	1.5139	Group VI	CAB56299	NBS-LRR protein [Solanum acaule]	CV435383		SGN-U288535
bf_suspxxxx_0061a09.t3m.scf	0.565015	0.567944	0.992405	1.42153	0.751434	0.429255	1.23692	Group IV	AAM12784	putative pectate-lyase [Capsicum annuum]	CV435254		SGN-U277674
bf_suspxxxx_0061a04.t3m.scf	0.580262	1.01728	0.889014	0.842401	0.662627	1.02713	1.28415	Group III	NP_195672	EMB2453 [Arabidopsis thaliana]	CV435250		SGN-U282955
bf_suspxxxx_0060c03.t3m.scf	0.954898	0.834881	1.22205	0.6488	1.09729	0.496267	0.73634	Group IV	NP_201034	unknown protein [Arabidopsis thaliana]	TC156119	similar to UP|Q9LVA8_ARATH (Q9LVA8) Gb|AAB82627.1 (At5g62280), partial (39%)	SGN-U268648
bf_suspxxxx_0055e01.t3m.scf	0.654036	0.953008	0.842016	0.975948	0.490312	1.05144	1.09932	Group III	ABD96865	hypothetical protein [Cleome spinosa]	CV434768		SGN-U285372
bf_suspxxxx_0054a01.t3m.scf	0.54434	0.737841	1.04745	0.671052	0.660627	1.66867	1.24997	Group III	CAA97692	receptor-like protein kinase [Catharanthus roseus]	CV434636		SGN-U285009
bf_suspxxxx_0048g10.t7m.scf	1.08409	0.802889	14.855	3.38761	0.668336	1.4048	1.13128	Group VI	AAF61864	DNA-binding protein 4 [Nicotiana tabacum]	CN216437	similar to PIR|T50861|T50861 DNA-binding protein 4 [imported] - common tobacco (fragment) {Nicotiana tabacum;}, partial (26%)	SGN-U270284
bf_suspxxxx_0046a11.t7m.scf	1.64231	1.00019	0.739522	1.11033	1.33537	2.13395	0.799838	Group I	EAY74475	hypothetical protein OsI_002322 [Oryza sativa (indica cultivar-group)]	CN216207		SGN-U295714
bf_suspxxxx_0042d05.t3m.scf	0.534414	0.752808	0.876001	0.796152	0.925658	0.367414	1.02186	Group III	ABK06451	flag-tagged protein kinase domain of putative mitogen-activated protein kinase kinase kinase [synthetic construct]	CN215886	similar to UP|Q8LES3 (Q8LES3) Protein kinase, partial (44%)	SGN-U275825
bf_suspxxxx_0025A12.t3m.scf	0.828764	1.06347	1.83843	1.91721	0.799569	0.971469	1.03253	Group VI	AAF23892	pectin methyl esterase [Solanum tuberosum]	CN214374		SGN-U270090
bf_suspxxxx_0024D03.t3m.scf	1.62455	0.859512	1.79801	1.88234	1.03935	2.46362	1.27808	Group VI	AAL57228	protein kinase-like protein [Capsicum annuum]	CN214321	homologue to UP|Q8W248 (Q8W248) Protein kinase-like protein (Fragment), complete	SGN-U280417
bf_suspxxxx_0023H01.t3m.scf	0.50293	0.987309	0.946165	1.22735	0.62515	0.462919	0.92933	Group III	AAC69120	hypothetical protein [Arabidopsis thaliana]	CN214276	weakly similar to UP|Q9ZV77 (Q9ZV77) At2g07170 protein, partial (5%)	SGN-U273031
bf_suspxxxx_0020H12.t3m.scf	0.922804	0.858003	2.88767	3.85945	1.53928	0.910508	0.84663	Group VII	P09762	Wound-induced protein WIN2 precursor	CN214028	homologue to PIR|T07729|T07729 wound-induced protein (clone TAB7) - tomato (fragment) {Lycopersicon esculentum;}, partial (35%)	SGN-U271959
bf_suspxxxx_0014c04.t3m.scf	1.04715	0.588575	1.56161	1.19556	0.962856	1.53272	0.569584	Group VI	AAU95246	putative thaumatin-like protein [Solanum tuberosum]	CN213453	similar to SP|P13046|PRR1_TOBAC Pathogenesis-related protein R major form precursor (Thaumatin-likeprotein E22)., partial (81%)	SGN-U274908
bf_suspxxxx_0005B12.t3m.scf	0.616607	0.841361	1.23659	1.28568	1.30126	1.23159	0.645798	Group III	Q9LW49	Ethylene-responsive transcription factor 4 (Ethylene-responsive element-binding factor 4 homolog) (EREBP-3) (NsERF3)	TC133057	similar to UP|ERF4_TOBAC (Q40477) Ethylene-responsive transcription factor 4 (Ethylene-responsive element-binding factor 4 homolog) (EREBP-3) (NtERF3), partial (85%)	SGN-U272388
bf_stolxxxx_0069f04.t3mb.scf	0.998814	1.01395	0.856472	0.629909	0.540927	2.01814	1.00001	Group II	NP_201050	unknown protein [Arabidopsis thaliana]	TC151603	similar to UP|Q9FJJ8_ARATH (Q9FJJ8) Arabidopsis thaliana genomic DNA, chromosome 5, TAC clone:K19B1, partial (87%)	SGN-U278079
bf_stolxxxx_0067b09.t3m.scf	0.845122	0.822143	1.1152	2.03198	2.99024	0.306795	0.667298	Group V	NP_001066904	Os12g0525300 [Oryza sativa (japonica cultivar-group)]	CX700008		SGN-U290018
bf_stolxxxx_0063g03.t3m.scf	1.55107	1.10268	1.07415	0.904797	1.22336	0.584397	0.607993	Group V	ABH07904	squamosa promoter binding-like protein [Lycopersicon esculentum]	CX700363		SGN-U273709
bf_stolxxxx_0063b04.t3m.scf	0.994405	1.16866	2.27252	1.52219	1.04929	1.83918	0.61352	Group VI	NA	NA	CX700322		SGN-U296232
bf_stolxxxx_0054g10.t3m.scf	0.552352	1.0418	0.941575	1.09767	0.883161	0.637502	1.19264	Group III	NA	NA	CX699216		SGN-U295882
bf_stolxxxx_0054d12.t3m.scf	1.03231	0.542921	1.16729	0.974352	0.99153	0.503263	1.17684	Group IV	BAA32778	Plasma membrane aquaporin (PAQ2) [Raphanus sativus]	CX699188		SGN-U287568
bf_stolxxxx_0053h03.t3m.scf	0.918286	1.17687	1.04074	0.838958	0.539349	0.465861	1.01015	Group V	NA	NA	TC155883	GB|AAB94924.1|2746721|AF038387 histone H4 {Capsicum annuum} (exp=-1; wgp=0; cg=0), complete	SGN-U268360
bf_stolxxxx_0043h12.t3m.scf	0.403019	1.20025	0.860165	0.900844	0.656784	1.09938	1.18351	Group III	NA	NA	CK853991	similar to PIR|T01449|T01449 cytoskeletal protein homolog F24O1.11 - Arabidopsis thaliana {Arabidopsis thaliana;}, partial (6%)	SGN-U286161
bf_stolxxxx_0041h12.t3m.scf	1.45242	0.500066	0.912096	0.903768	1.15816	0.593812	0.764559	Group IV	NA	NA	TC157679	similar to UP|Q9M0B5_ARATH (Q9M0B5) Glycine-rich protein, partial (91%)	SGN-U295274
bf_stolxxxx_0039h05.t3m.scf	0.779583	0.539414	1.18079	1.02623	0.987769	0.441482	1.18002	Group IV	AAB18227	MipC [Mesembryanthemum crystallinum]	CK853697	similar to UP|Q9XF74 (Q9XF74) Water channel protein MipH, partial (38%)	SGN-U269804
bf_stolxxxx_0035f01.t3m.scf	1.29076	0.803351	1.14846	1.11923	0.299409	0.607095	1.91091	Group V	NA	NA	CK853384		SGN-U269331
bf_stolxxxx_0029c08.t3m.scf	0.498892	1.1699	0.931464	1.09515	0.521114	1.8654	1.00611	Group II	NA	NA	CK852917		SGN-U269129
bf_stolxxxx_0023H04.t3m.scf	0.593499	0.888803	1.03494	1.05445	0.652839	1.18392	0.986979	Group III	CAC20221	ribosomal protein L2 [Glycine max]	CK852542	similar to SP|P29766|RL2_LYCES 60S ribosomal protein L2 (L8) (Ribosomal protein TL2). {Lycopersicon esculentum;}, partial (32%)	SGN-U268492
bf_stolxxxx_0020d11.t3m.scf	0.629974	0.990774	1.00756	0.746205	0.383839	1.47469	0.900726	Group II	CAL57864	putative ribosomal protein S4 (ISS) [Ostreococcus tauri]	TC133241	homologue to UP|Q2XPX5_SOLTU (Q2XPX5) 40S ribosomal protein S4-like protein, complete	SGN-U268264
bf_stolxxxx_0017h02.t7m.scf	1.52023	0.545253	2.2713	0.840102	1.54654	3.59408	1.14244	Group I	Q08507	1-aminocyclopropane-1-carboxylate oxidase 3 (ACC oxidase 3) (Ethylene-forming enzyme) (EFE)	CK852114	similar to SP|P24157|ACC4_LYCES 1-aminocyclopropane-1-carboxylate oxidase 4 () (ACCoxidase 4) (Ethylene-forming enzyme) (EFE), partial (33%)	SGN-U287276
bf_stolxxxx_0010H03.t3m.scf	0.659555	0.842396	0.894336	0.800604	0.614771	2.00733	0.865685	Group II	P34824	Elongation factor 1-alpha (EF-1-alpha)	CK851618	homologue to UP|Q9M7E4 (Q9M7E4) Elongation factor 1 alpha, partial (11%)	SGN-U277731
bf_stolxxxx_0008f08.t3m.scf	0.664584	0.964079	0.96658	0.749239	0.610703	2.21769	0.972892	Group II	NA	NA	CK851450		SGN-U268372
bf_stolxxxx_0004G10.t3m.scf	0.606866	0.631298	0.864811	1.08223	0.991105	0.83769	1.00351	Group III	AAY17262	TSC13 protein [Nicotiana benthamiana]	CK851154	similar to UP|Q8GTD7 (Q8GTD7) Steroid 5-alpha reductase () (EC 1.3.99.5), partial (29%)	SGN-U271283
bf_slmwxxxx_0005e11.t3m.scf	1.71081	1.01179	0.996182	1.03342	1.85233	0.820829	0.464693	Group I	AAC95130	metallocarboxypeptidase inhibitor IIa precursor [Solanum tuberosum]	CV651444		SGN-U290840
bf_slmwxxxx_0004f06.t3m.scf	1.16142	0.923286	1.62023	1.67433	1.00139	1.20954	1.06083	Group VI	NA	NA	CV651375		SGN-U295489
bf_slmwxxxx_0002c10.t3m.scf	0.90366	1.10699	1.07977	0.587805	0.566823	4.35435	0.852179	Group II	NA	NA	TC136364	homologue to UP|Q307Z5_SOLTU (Q307Z5) Deacetylase-like protein, partial (98%)	SGN-U268689
bf_mxlfxxxx_0075g07.t3m.scf	1.54116	2.19185	1.5128	1.39313	2.07186	0.8307	1.35865	Group VIII	NA	NA	CX162932		SGN-U294904
bf_mxlfxxxx_0075b08.t3m.scf	0.773746	1.67215	1.33058	1.40201	1.57904	2.94477	1.02713	Group I	NA	NA	CX162882		SGN-U297999
bf_mxlfxxxx_0073d01.t3m.scf	1.4374	1.03248	1.45184	2.20955	1.26543	1.85564	1.03972	Group VI	NA	NA	CX162746		SGN-U287460
bf_mxlfxxxx_0072d08.t3m.scf	1.89151	0.976251	0.946282	1.35521	0.988259	1.56906	1.02577	Group I	NA	NA	CX162675		SGN-U297812
bf_mxlfxxxx_0071g06.t3m.scf	1.11882	1.0832	0.963254	0.647268	0.638556	1.809	0.916443	Group II	NP_001045109	Os01g0901200 [Oryza sativa (japonica cultivar-group)]	CX162622		SGN-U297364
bf_mxlfxxxx_0071c09.t3m.scf	1.11201	0.975188	1.30428	1.36728	3.0494	3.37433	1.07647	Group I	BAF48321	phosphoenolpyruvate carboxylase kinase [Flaveria bidentis]	CX162585		SGN-U271455
bf_mxlfxxxx_0070e03.t3m.scf	2.17064	0.677281	5.75022	7.06276	1.73815	2.2579	1.9735	Group VI	ABG23376	phytophthora-inhibited protease 1 [Solanum lycopersicum]	CX162516		SGN-U289960
bf_mxlfxxxx_0068d04.t3m.scf	1.58692	0.553224	1.19232	0.971727	2.30636	3.37424	0.250792	Group I	AAV36809	arginase 2 [Lycopersicon esculentum]	TC157721	homologue to UP|Q5UNS1_LYCES (Q5UNS1) Arginase 2, partial (31%)	SGN-U270638
bf_mxlfxxxx_0066f10.t3m.scf	1.5462	1.01403	1.20936	1.05121	1.03535	1.74805	1.01156	Group I	BAF46296	cytochrome P450 [Ipomoea nil]	CX162195		SGN-U293710
bf_mxlfxxxx_0066e07.t3m.scf	1.34064	0.611621	1.14644	1.02437	1.28367	10.5864	1.66145	Group I	NP_180763	N-acetyltransferase [Arabidopsis thaliana]	CX162181		SGN-U291209
bf_mxlfxxxx_0065f11.t3m.scf	0.78993	1.01785	1.28918	2.72132	14.2045	25.1221	1.32008	Group I	NA	NA	TC152755	weakly similar to UP|Q9LPR3_ARATH (Q9LPR3) F15H18.4, partial (3%)	SGN-U278900
bf_mxlfxxxx_0062d02.t3m.scf	1.52733	1.00751	1.22912	0.978397	1.18363	2.10553	1.2813	Group I	NA	NA	CV501558		SGN-U292532
bf_mxlfxxxx_0057g11.t3m.scf	1.0626	1.00279	0.962485	0.574782	1.10771	0.625451	1.01687	Group IV	NA	NA	CV501156		SGN-U298268
bf_mxlfxxxx_0056b11.t3m.scf	0.810014	0.891084	2.47265	3.77638	0.871178	0.983974	1.28806	Group VI	AAU95243	osmotin-like protein [Solanum tuberosum]	TC134222	homologue to UP|Q5XUH0_SOLTU (Q5XUH0) Osmotin-like protein, complete	SGN-U269310
bf_mxlfxxxx_0054c11.t3m.scf	1.27383	1.02356	0.949983	3.7707	61.5315	0.939144	0.8789	Group VII	CAD30864	putative phosphatase [Solanum lycopersicum]	CV500850		SGN-U294068
bf_mxlfxxxx_0052f08.t3m.scf	1.52867	0.884952	1.24273	0.155293	2.62223	0.727701	0.612696	Group IV	AAQ05799	DNA binding protein Rav [Capsicum annuum]	CV500709		SGN-U281531
bf_mxlfxxxx_0052c06.t3m.scf	0.951892	1.24006	1.26045	1.67922	0.976335	2.03764	1.1256	Group VI	NP_176620	DNA binding / transcription factor [Arabidopsis thaliana]	CV500673		SGN-U291126
bf_mxlfxxxx_0051h05.t3m.scf	0.890061	1.30415	0.909407	6.35811	38.6186	6.24776	1.1163	Group I	NA	NA	CV500636		SGN-U268842
bf_mxlfxxxx_0049a10.t3m.scf	0.315186	1.02118	0.995799	1.64376	1.59069	0.627154	0.929122	Group III	AAG26165	photosystem II D2 protein [Cabomba caroliniana]	TC132839	homologue to UP|Q3V538_ACOCL (Q3V538) PSII 43 kDa protein, complete	SGN-U295105
bf_mxlfxxxx_0044h03.t3m.scf	2.17482	1.03183	0.892349	1.34265	1.83173	1.68423	0.334755	Group I	NA	NA	TC139638		SGN-U274019
bf_mxlfxxxx_0041c04.t3m.scf	1.18393	0.70756	1.05151	0.867085	1.86041	1.7197	1.50856	Group I	NA	NA	TC139287		SGN-U275291
bf_mxlfxxxx_0040f08.t3m.scf	1.48038	0.377094	1.63857	2.43558	0.836407	1.83066	0.671621	Group VI	ABD32531	Amino acid/polyamine transporter II [Medicago truncatula]	CV499789		SGN-U297311
bf_mxlfxxxx_0039g03.t3m.scf	1.02847	1.1815	1.01993	0.642695	0.562447	4.22598	0.759686	Group II	NA	NA	CV499717		SGN-U287604
bf_mxlfxxxx_0037d11.t3m.scf	1.34189	1.16154	2.34261	2.12298	1.02375	2.15237	0.926755	Group VI	NA	NA	CV499538		SGN-U291088
bf_mxlfxxxx_0035d10.t3m.scf	1.1935	0.872903	1.94174	3.03128	1.27232	1.4511	1.33757	Group VI	CAE05487	OSJNBa0022H21.7 [Oryza sativa (japonica cultivar-group)]	CV499368		SGN-U289859
bf_mxlfxxxx_0035c04.t3m.scf	0.957001	1.15366	0.910473	0.675791	1.46586	0.536963	0.488503	Group IV	NP_568556	unknown protein [Arabidopsis thaliana]	CV499353		SGN-U296707
bf_mxlfxxxx_0034c02.t3m.scf	0.748933	0.893687	0.641123	0.781139	0.919548	0.182065	0.465472	Group V	NA	NA	CV499271		SGN-U296323
bf_mxlfxxxx_0033f01.t3m.scf	1.53326	1.04498	0.904715	1.09022	1.08403	1.54017	0.850744	Group I	EAZ27556	hypothetical protein OsJ_011039 [Oryza sativa (japonica cultivar-group)]	CV499216		SGN-U291947
bf_mxlfxxxx_0033c04.t3m.scf	0.648464	1.12186	1.20026	2.05416	0.641726	0.690598	1.08729	Group VIII	NA	NA	CV499187		SGN-U290433
bf_mxlfxxxx_0032g01.t3m.scf	0.963979	1.04361	1.54058	2.39613	1.29103	2.02162	0.854167	Group VI	NP_187787	unknown protein [Arabidopsis thaliana]	CV499143		SGN-U298970
bf_mxlfxxxx_0031g02.t3m.scf	0.925157	1.11612	0.98844	0.589956	0.527416	2.5023	0.800344	Group II	NA	NA	CV499059		SGN-U286478
bf_mxlfxxxx_0031f04.t3m.scf	1.44961	0.762877	2.04128	2.16934	1.2509	1.8118	1.19425	Group VI	NA	NA	CV499050		SGN-U297228
bf_mxlfxxxx_0029h11.t3m.scf	0.928238	1.42497	1.00829	0.582653	0.531962	2.63682	0.893032	Group II	ABO80657	Nop14-like protein [Medicago truncatula]	CV498915		SGN-U289524
bf_mxlfxxxx_0029b09.t3m.scf	1.63555	0.890547	0.663834	0.643923	0.866553	0.709477	0.583139	Group V	NA	NA	CV498856		SGN-U290238
bf_mxlfxxxx_0028e12.t3m.scf	0.938735	0.599117	1.08709	1.12649	1.0925	0.605368	1.05892	Group IV	ABD32298	TGF-beta receptor, type I/II extracellular region [Medicago truncatula]	CV498805		SGN-U270999
bf_mxlfxxxx_0026d04.t3m.scf	1.62068	1.36619	0.993657	0.783219	0.990855	1.83073	1.0029	Group I	NA	NA	CV498616		SGN-U293164
bf_mxlfxxxx_0023g05.t3m.scf	1.42279	1.06092	1.64304	2.01471	1.16606	0.842694	1.12625	Group VII	NP_194459	ATP binding / protein kinase/ protein serine/threonine kinase/ protein-tyrosine kinase/ sugar binding [Arabidopsis thaliana]	CV498400		SGN-U291124
bf_mxlfxxxx_0021e03.t3m.scf	1.02239	1.18663	0.919333	0.826673	0.611561	0.61169	1.23192	Group V	NP_195199	RNA binding [Arabidopsis thaliana]	TC149434	similar to UP|RBFA_ARATH (O65693) Probable ribosome-binding factor A, chloroplast precursor, partial (63%)	SGN-U295816
bf_mxlfxxxx_0020b09.t3m.scf	0.856619	0.658397	1.7969	2.35121	1.31152	1.60597	1.24303	Group VI	O04682	Pathogenesis-related genes transcriptional activator PTI6 (PTO-interacting protein 6)	CV498103		SGN-U269252
bf_mxlfxxxx_0017d09.t3m.scf	1.30177	1.0626	0.917824	0.427485	0.444999	0.883086	0.235505	Group V	NA	NA	TC160405	similar to UP|CAMT_POPKI (P93711) Caffeoyl-CoA O-methyltransferase (Trans-caffeoyl-CoA 3-O-methyltransferase) (CCoAMT) (CCoAOMT) , partial (17%)	SGN-U273220
bf_mxlfxxxx_0016b12.t3m.scf	1.4394	1.13572	0.958658	0.715969	0.859213	2.88867	1.6646	Group I	NA	NA	CV497778		SGN-U299095
bf_mxlfxxxx_0012e02.t3m.scf	1.95043	0.698802	1.08834	0.802229	3.43042	2.10679	0.365566	Group I	ABG49145	proteinase inhibitor isoform [Solanum phureja]	CV497452		SGN-U286864
bf_mxlfxxxx_0012c07.t3m.scf	0.845262	0.649802	1.20868	0.763999	0.860739	1.63123	1.72427	Group I	NA	NA	CV497437		SGN-U289189
bf_mxlfxxxx_0011a10.t3m.scf	1.23598	0.90286	2.36693	0.745626	1.05104	4.50532	0.65594	Group I	NP_193573	unknown protein [Arabidopsis thaliana]	CV497336		SGN-U298130
bf_mxlfxxxx_0008e01.t3m.scf	1.21409	1.28503	0.968062	0.829013	0.5387	0.61901	0.995804	Group V	AAM61552	thylakoid lumen protein, chloroplast precursor [Arabidopsis thaliana]	CV497134		SGN-U294091
bf_mxlfxxxx_0003f11.t3m.scf	0.721442	1.60409	1.02108	1.0043	1.26341	2.31179	0.799018	Group I	NA	NA	CV496721		SGN-U297065
bf_mxlfxxxx_0002c08.t3m.scf	1.01329	0.909487	1.39564	1.99759	1.21523	2.37252	0.949762	Group VI	NA	NA	CV496596		SGN-U297975
bf_mxflxxxx_0073f01.t3m.scf	1.12796	1.05832	1.02863	0.861525	0.573256	0.539462	1.09196	Group V	NA	NA	CX161842		SGN-U273859
bf_mxflxxxx_0069c05.t3m.scf	0.638321	1.0072	0.935009	0.761252	0.584687	1.56889	1.03982	Group II	ABB16976	GTP-binding-like protein [Solanum tuberosum]	CX161499		SGN-U269882
bf_mxflxxxx_0067f12.t3m.scf	1.61377	1.1108	1.00029	1.04352	1.56619	1.02041	0.862775	Group I	EAY81120	hypothetical protein OsI_035079 [Oryza sativa (indica cultivar-group)]	CX161359		SGN-U297582
bf_mxflxxxx_0064b12.t3m.scf	0.369826	0.996716	1.09803	0.983374	0.643694	2.78623	0.972711	Group II	NA	NA	CV506664		SGN-U289448
bf_mxflxxxx_0063b10.t3m.scf	0.639718	1.46539	0.884354	0.659459	0.678008	0.593788	0.753984	Group V	ABM91065	xyloglucan endotransglycosylase/hydrolase precursor XTH-1 [Populus tremula x Populus tremuloides]	CV506586		SGN-U291172
bf_mxflxxxx_0060e08.t3m.scf	1.16468	0.710131	1.64755	1.67969	1.28279	1.60997	1.27486	Group VI	AAG01117	BAC19.2 [Lycopersicon esculentum]	CV506371		SGN-U295221
bf_mxflxxxx_0059f12.t3m.scf	1.0196	1.82511	1.03632	1.16431	0.732124	0.425054	0.599973	Group V	ABO79693	Kinesin, motor region [Medicago truncatula]	CV506297		SGN-U299024
bf_mxflxxxx_0059d08.t3m.scf	1.78162	0.700771	0.757071	0.80608	1.5953	2.8582	0.599261	Group I	CAA55813	Sn-2 [Capsicum annuum]	CV506271		SGN-U291181
bf_mxflxxxx_0058h02.t3m.scf	0.963024	1.0187	0.805509	0.844624	0.555156	0.659927	1.33132	Group V	NA	NA	CV506222		SGN-U292173
bf_mxflxxxx_0057e03.t3m.scf	1.09574	1.62208	1.05519	0.848681	0.448515	1.98718	0.979058	Group II	NA	NA	TC157789		SGN-U286969
bf_mxflxxxx_0057e02.t3m.scf	1.05923	0.860486	1.04166	0.853604	0.740794	0.66403	0.616327	Group V	NA	NA	CV506100		SGN-U289976
bf_mxflxxxx_0055b07.t3m.scf	1.21382	1.10855	0.908113	0.591025	3.75402	0.951984	0.386812	Group I	NP_001049153	Os03g0178500 [Oryza sativa (japonica cultivar-group)]	TC158636		SGN-U275049
bf_mxflxxxx_0054c12.t3m.scf	1.02982	0.576958	1.05936	0.975659	1.90623	2.00388	1.62092	Group I	AAA69908	endo-1,4-beta-glucanase precursor	CV505830		SGN-U291741
bf_mxflxxxx_0051b11.t3m.scf	1.21862	1.17496	1.07413	0.885799	0.629158	0.629421	1.32907	Group V	AAM61190	unknown [Arabidopsis thaliana]	CV505571		SGN-U277494
bf_mxflxxxx_0050d05.t3m.scf	0.729871	0.566918	1.06069	0.652001	2.34195	1.62403	0.152629	Group I	NA	NA	CV505499		SGN-U295215
bf_mxflxxxx_0048b03.t3m.scf	2.09493	1.07124	0.642878	4.78349	1.10081	0.411167	1.11284	Group VIII	NA	NA	CV506984		SGN-U292738
bf_mxflxxxx_0047g06.t3m.scf	1.19085	0.670278	1.81136	2.30978	1.71114	1.86347	1.29109	Group VI	ABN09016	Phosphoglycerate/bisphosphoglycerate mutase [Medicago truncatula]	TC145043	similar to UP|O04035_ARATH (O04035) F7G19.18 protein, partial (21%)	SGN-U273450
bf_mxflxxxx_0046c04.t3m.scf	1.52516	1.26244	0.818851	1.055	1.15298	1.60774	0.945118	Group I	NA	NA	CV506825		SGN-U294951
bf_mxflxxxx_0043g06.t3m.scf	1.32253	0.646356	1.81981	2.28663	1.83275	1.23661	1.10526	Group VI	NA	NA	CV505294		SGN-U273450
bf_mxflxxxx_0041h09.t3m.scf	0.504994	0.510431	0.999129	1.03614	0.987092	1.1814	1.03814	Group III	AAM13046	putative protein transport protein SEC61 alpha subunit [Arabidopsis thaliana]	CV505156		SGN-U271416
bf_mxflxxxx_0039g01.t3m.scf	2.18104	0.830026	0.487555	2.61596	0.528847	0.541112	0.750382	Group VIII	NA	NA	CV504981		SGN-U296304
bf_mxflxxxx_0037f04.t3m.scf	1.11376	0.780239	0.650204	2.24229	0.855629	0.749468	2.24534	Group VIII	ABH02884	MYB transcription factor MYB164 [Glycine max]	CV504810		SGN-U295822
bf_mxflxxxx_0032g11.t3m.scf	1.81215	0.921395	0.934418	0.944539	0.925425	2.15545	1.5019	Group I	NP_175691	oxidoreductase, acting on paired donors, with incorporation or reduction of molecular oxygen, 2-oxoglutarate as one donor, and incorporation of one atom each of oxygen into both donors [Arabidopsis thaliana]	CV504407		SGN-U289507
bf_mxflxxxx_0031a10.t3m.scf	1.08638	0.941188	0.801431	0.901686	1.21051	0.401564	0.586718	Group V	NA	NA	CV504267		SGN-U294328
bf_mxflxxxx_0030g11.t3m.scf	1.36573	1.03745	1.01902	0.615856	1.52928	0.875291	0.666585	Group IV	NA	NA	TC157900	similar to UP|Q40128_LYCES (Q40128) Flower-specific gamma-thionin-like protein/acidic protein precursor, partial (65%)	SGN-U268104
bf_mxflxxxx_0029g02.t3m.scf	0.612584	0.940186	0.883867	0.881956	0.889122	0.903375	0.496296	Group V	Q08307	Polyphenol oxidase E, chloroplast precursor (PPO) (Catechol oxidase)	CV504157		SGN-U268107
bf_mxflxxxx_0029f05.t3m.scf	0.562527	0.709663	0.956531	0.954748	1.20711	0.632872	1.35788	Group III	NA	NA	TC145770	weakly similar to RF|NP_186824.1|15232175|NM_111041 protein binding {Arabidopsis thaliana} (exp=-1; wgp=0; cg=0), partial (17%)	SGN-U292545
bf_mxflxxxx_0028e11.t3m.scf	1.37757	1.1009	0.959733	0.595904	1.12493	0.810806	0.505518	Group I	AAA80497	unknown	TC157915	similar to UP|Q8W5R3_RAPSA (Q8W5R3) Water-soluble chlorophyll protein, partial (7%)	SGN-U281865
bf_mxflxxxx_0027g02.t3m.scf	1.30357	1.07894	2.39194	2.40476	1.2235	0.894661	1.26362	Group VI	AAT38751	RNA-directed RNA polymerase, putative [Solanum demissum]	TC150928	UP|Q5XWN1_SOLTU (Q5XWN1) RNA-directed RNA polymerase-like, complete	SGN-U298645
bf_mxflxxxx_0026g01.t3m.scf	1.10689	0.490777	1.54911	0.663958	1.07467	0.677301	1.1289	Group IV	ABO81417	Expansin 45, endoglucanase-like [Medicago truncatula]	CV503920		SGN-U292056
bf_mxflxxxx_0025b08.t3m.scf	0.594425	0.975384	1.05394	0.811065	1.10917	0.578629	1.09627	Group III	BAF01171	hypothetical protein [Arabidopsis thaliana]	CV503815		SGN-U293182
bf_mxflxxxx_0022h08.t3m.scf	0.928519	0.986235	0.974146	1.16636	1.96564	1.53273	1.11809	Group I	AAO27256	putative NADH-dehydrogenase [Pisum sativum]	CV503629		SGN-U293507
bf_mxflxxxx_0021h04.t3m.scf	1.09893	1.13445	0.790342	0.267556	0.500985	0.548232	0.920142	Group V	ABE79318	Plant lipid transfer/seed storage/trypsin-alpha amylase inhibitor [Medicago truncatula]	CV503535		SGN-U271897
bf_mxflxxxx_0011d11.t3m.scf	0.954002	0.89634	1.51875	1.21317	0.9422	1.5839	1.26465	Group VI	NA	NA	CV502672		SGN-U291389
bf_mxflxxxx_0004e02.t3m.scf	0.778587	1.47519	0.918626	0.601404	0.425295	1.90528	1.02847	Group II	NA	NA	CV502065		SGN-U296198
bf_mxflxxxx_0002f05.t3m.scf	1.00522	1.20834	1.10406	0.603254	0.531766	2.39348	0.945732	Group II	AAD40002	small zinc finger-like protein [Lycopersicon esculentum]	CV501911		SGN-U295194
bf_lbchxxxx_0065f01.t3m.scf	1.27171	1.08329	0.835193	0.45276	1.22869	0.541934	0.423912	Group IV	ABC69417	CYP72A54 [Nicotiana tabacum]	TC160806	similar to UP|Q2MJ17_MEDTR (Q2MJ17) Cytochrome P450 monooxygenase CYP72E, partial (6%)	SGN-U268872
bf_lbchxxxx_0061g07.t3m.scf	0.943932	1.56252	1.25536	1.52848	0.700868	0.574781	0.33723	Group V	AAG51901	hypothetical protein; 74608-67463 [Arabidopsis thaliana]	DN590600		SGN-U282303
bf_lbchxxxx_0059f05.t3m.scf	0.814998	0.569375	1.31165	0.520778	1.28663	1.01183	0.936748	Group IV	NA	NA	TC155456	homologue to UP|Q3I5C4_LYCES (Q3I5C4) Cytosolic ascorbate peroxidase 1, partial (75%)	SGN-U268593
bf_lbchxxxx_0059e01.t3m.scf	2.20054	1.04466	0.26397	5.08979	0.330278	0.951776	0.615143	Group VIII	NA	NA	DN590437		SGN-U285364
bf_lbchxxxx_0058g08.t3m.scf	0.738652	1.15613	1.53003	1.09897	0.772968	10.3278	0.531166	Group I	Q02200	Lignin-forming anionic peroxidase precursor	NA	NA
bf_lbchxxxx_0055e04.t3m.scf	1.03093	0.838364	1.09744	0.878221	1.50561	1.91788	0.88168	Group I	AAB65767	lipoxygenase	DN590156		SGN-U285664
bf_lbchxxxx_0055a09.t3m.scf	1.52895	1.16542	0.870519	2.88944	1.45869	0.853568	0.835397	Group VIII	NA	NA	DN590125		SGN-U292547
BF_LBCHXXXX_0054F06_T3M.SCF	0.989907	1.59907	0.785108	1.03697	0.865322	2.47606	1.02344	Group II	NA	NA	DN590098		SGN-U269491
BF_LBCHXXXX_0053E03_T3M.SCF	1.49847	0.635742	1.17408	1.03285	1.13123	1.66267	2.1165	Group I	1ICP	Chain A, Crystal Structure Of 12-Oxophytodienoate Reductase 1 From Tomato Complexed With Peg400	DN590022		SGN-U269505
BF_LBCHXXXX_0053E01_T3M.SCF	0.960534	0.971803	1.02746	1.56887	1.98564	3.55958	1.2685	Group I	NA	NA	DN590021		SGN-U281773
BF_LBCHXXXX_0049G08_T3M.SCF	1.22826	1.47743	0.784272	0.925411	0.521176	0.387248	1.21059	Group V	NA	NA	DN589791		SGN-U296447
BF_LBCHXXXX_0045C10_T3M.SCF	1.50517	0.748562	0.974516	0.808916	1.24745	2.89861	1.24335	Group I	NA	NA	DN589505		SGN-U295740
BF_LBCHXXXX_0043C08_T3M.SCF	1.55103	0.724028	0.842744	0.991949	1.84696	6.81573	1.15413	Group I	ABI34336	hypothetical protein SDM1_41t00011 [Solanum demissum]	DN589387		SGN-U275858
BF_LBCHXXXX_0042G01_T3M.SCF	1.17709	1.07728	4.87422	3.14465	1.7888	1.57363	0.678934	Group VII	BAB78476	PR-1 [Solanum torvum]	DN589350		SGN-U269642
BF_LBCHXXXX_0031C03_T3M.SCF	0.607494	0.994307	0.882787	1.36949	0.79746	0.504418	1.384	Group III	NA	NA	DN588621		SGN-U283420
BF_LBCHXXXX_0029A02_T3M.SCF	1.80759	0.785965	0.717652	0.690138	1.6511	2.06191	1.24877	Group I	NA	NA	DN588483		SGN-U288041
BF_LBCHXXXX_0028G05_T3M.SCF	0.208068	1.05559	1.29499	2.31409	1.50535	1.11074	1.11909	Group III	NA	NA	DN588471		SGN-U273345
BF_LBCHXXXX_0027B09_T3M.SCF	0.741665	0.691236	1.25931	1.40709	1.63123	3.97662	1.01774	Group I	NA	NA	DN588369		SGN-U297167
BF_LBCHXXXX_0020G12_T3M.SCF	1.4314	0.746672	0.871608	0.755783	0.841095	1.77294	2.38021	Group I	NA	NA	DN587956		SGN-U298822
BF_LBCHXXXX_0018C02_T3M.SCF	1.38061	0.876235	1.78339	1.24619	1.34946	2.6092	0.561227	Group VI	NA	NA	TC138263	similar to UP|Q9FXS4_TOBAC (Q9FXS4) NtEIG-A1 protein, partial (76%)	SGN-U274162
BF_LBCHXXXX_0015A05_T3M.SCF	1.3739	1.41087	0.819968	0.618821	0.582491	0.804578	0.899919	Group II	NA	NA	DN587582		SGN-U298375
BF_LBCHXXXX_0005G03_T3M.SCF	0.997746	1.18181	0.992984	1.0575	0.376414	0.530537	1.14281	Group V	NA	NA	DN586963		SGN-U275337
BF_LBCHXXXX_0002F05_T3M.SCF	0.857497	1.46363	0.926445	0.574952	0.622293	1.63336	0.875068	Group II	NA	NA	DN586768		SGN-U268324
bf_ivrootxx_0062b04.t3m.scf	0.978023	0.922676	2.00709	1.67389	1.38302	2.09272	0.735979	Group VI	NA	NA	CO502614		SGN-U295621
bf_ivrootxx_0062a06.t3m.scf	0.670077	1.63314	1.28327	10.7698	92.5397	1.48985	1.04958	Group VII	NA	NA	CO502605		SGN-U290647
bf_ivrootxx_0061c03.t3m.scf	1.23143	2.05543	1.27176	9.2883	68.3841	1.29419	0.684897	Group VII	NP_566159	SRG3 (SENESCENCE-RELATED GENE 3); glycerophosphodiester phosphodiesterase [Arabidopsis thaliana]	CO502533		SGN-U275745
bf_ivrootxx_0060e03.t3m.scf	1.4338	1.65921	0.868452	0.839808	1.03782	1.81612	0.616505	Group I	ABI34306	Polyprotein, putative [Solanum demissum]	TC152523	similar to UP|Q5UDR1_MAIZE (Q5UDR1) Transposase, partial (4%)	SGN-U291742
bf_ivrootxx_0060a05.t3m.scf	0.800361	1.57634	1.28141	1.58334	0.741193	3.10474	0.759561	Group VI	ABE84418	hypothetical protein MtrDRAFT_AC122168g16v2 [Medicago truncatula]	CO502426		SGN-U294553
bf_ivrootxx_0055g01.t3m.scf	1.06002	0.493278	0.922788	0.723597	0.71261	2.18295	1.53502	Group I	BAB09438	unnamed protein product [Arabidopsis thaliana]	CO502050		SGN-U296203
bf_ivrootxx_0051D08.t3m.scf	1.32672	0.633096	1.69519	0.54346	0.955885	5.7551	0.841206	Group I	NA	NA	CK864243		SGN-U293775
bf_ivrootxx_0050h05.t3m.scf	0.285572	0.644745	0.940529	0.856872	0.871888	1.60797	0.951642	Group III	NP_197204	XPO1A; protein transporter [Arabidopsis thaliana]	CK864195	similar to PIR|T51557|T51557 Exportin1 (XPO1) protein - Arabidopsis thaliana (fragment) {Arabidopsis thaliana;}, partial (16%)	SGN-U293562
bf_ivrootxx_0050f04.t3m.scf	1.01453	0.355965	0.922921	0.574122	0.937056	2.1194	1.66381	Group I	NP_199892	unknown protein [Arabidopsis thaliana]	CK864171	similar to UP|Q9LUE3 (Q9LUE3) MtN3-like protein, partial (25%)	SGN-U269004
bf_ivrootxx_0049f03.t3m.scf	0.585875	0.636194	0.923798	0.971752	1.28985	2.11964	1.71342	Group I	NP_001043099	Os01g0385400 [Oryza sativa (japonica cultivar-group)]	CK864085		SGN-U291039
bf_ivrootxx_0049b04.t3m.scf	0.926492	1.19903	0.940326	0.660172	0.454807	2.16201	0.800763	Group II	CAB87681	putative protein [Arabidopsis thaliana]	CK864043		SGN-U290182
bf_ivrootxx_0048g06.t3m.scf	0.466667	1.18145	0.982903	0.851359	1.29977	0.663588	1.03961	Group III	Q42883	Calcium-transporting ATPase, endoplasmic reticulum-type	CK864009	homologue to PIR|A46284|S27763 Ca2+-transporting ATPase () LCA1 - tomato {Lycopersicon esculentum;} (EC 3.6.1.38 EC 3.6.3.8), partial (18%)	SGN-U296578
bf_ivrootxx_0044a08.t3m.scf	1.30505	0.989257	0.986896	4.65207	58.7946	1.9457	1.35893	Group VII	NA	NA	CK863601		SGN-U290646
bf_ivrootxx_0042a11.t3m.scf	0.777568	1.01535		13.3078	154.214	1.28903	0.950836	Group VII	NA	NA	CK863430	similar to UP|Q94A21 (Q94A21) AT5g15330/F8M21_220, partial (7%)	SGN-U289697
bf_ivrootxx_0040h03.t3m.scf	1.08889	1.10338	1.16824	3.29646	32.8058	7.15478	1.63212	Group I	BAC55156	purple acid phosphatase [Nicotiana tabacum]	CK863324	homologue to UP|Q84KZ1 (Q84KZ1) Purple acid phosphatase, partial (17%)	SGN-U294320
bf_ivrootxx_0040e05.t3m.scf	1.03152	0.25927	0.774481	0.512767	0.384745	4.92742	2.21565	Group I	NP_199696	unknown protein [Arabidopsis thaliana]	CK863295	similar to GB|AAO63361.1|28950875|BT At5g48850 {Arabidopsis thaliana;}, partial (55%)	SGN-U295080
bf_ivrootxx_0038d12.t3m.scf	0.551217	0.645237	0.989528	1.08133	1.36854	1.11899	0.887886	Group III	EAY91156	hypothetical protein OsI_012389 [Oryza sativa (indica cultivar-group)]	CK863117		SGN-U272383
bf_ivrootxx_0031h10.t3m.scf	1.10114	1.05019	1.66287	0.575804	1.17744	1.9878	1.05215	Group I	NP_181474	catalytic/ hydrolase [Arabidopsis thaliana]	CK862542	similar to GB|AAN38681.1|23507755|BT At2g39400/F12L6.6 {Arabidopsis thaliana;}, partial (40%)	SGN-U278234
bf_ivrootxx_0031e05.t3m.scf	0.724123	0.755771	2.28323	1.01253	1.3592	13.6777	1.30484	Group I	BAA87058	WIZZ [Nicotiana tabacum]	CK862502	similar to UP|Q9SSX8 (Q9SSX8) WIZZ, partial (16%)	SGN-U274031
bf_ivrootxx_0022g10.t3m.scf	1.22215	0.743506	1.35138	3.06923	1.98602	2.07055	2.41462	Group VI	ABG29323	Receptor protein kinase, putative [Solanum bulbocastanum]	CK861722		SGN-U295647
bf_ivrootxx_0017a09.t3m.scf	1.4108	1.05185	1.87257	1.79397	0.997787	1.29556	1.37178	Group VI	NP_194459	ATP binding / protein kinase/ protein serine/threonine kinase/ protein-tyrosine kinase/ sugar binding [Arabidopsis thaliana]	CK861219	similar to UP|Q40096 (Q40096) Receptor protein kinase, partial (12%)	SGN-U290148
bf_ivrootxx_0003d02.t3m.scf	0.318827	1.32828	1.05321	1.46087	1.47461	0.579704	0.809227	Group III	AAZ04077	photosystem II 44 kDa protein [Nuphar advena]	TC132839	homologue to UP|Q3V538_ACOCL (Q3V538) PSII 43 kDa protein, complete	SGN-U295105
bf_cswcxxxx_0006h05.t3m.scf	0.997902	0.911506	0.830187	1.16595	4.63427	1.61622	0.284301	Group I	Q41488	Proteinase inhibitor type-2 P303.51 precursor (Proteinase inhibitor type II P303.51)	DV623180		SGN-U268244
bf_cswcxxxx_0006c04.t3m.scf	1.20796	0.830072	1.07795	0.751069	1.10133	9.0704	1.63238	Group I	NA	NA	DV623128		SGN-U277831
bf_cswcxxxx_0005c09.t3m.scf	1.49562	0.880644	1.05324	0.857359	2.21509	1.54859	0.434415	Group I	NA	NA	DV623046		SGN-U280995
bf_cswcxxxx_0005c02.t3m.scf	0.585164	1.02799	1.00723	0.6362	0.517988	2.21969	0.944948	Group II	NA	NA	DV623039		SGN-U268494
bf_cswcxxxx_0003d08.t3m.scf	0.813502	0.627631	0.964583	0.642199	1.34941	0.968963	1.27953	Group IV	ABE86055	Amino acid/polyamine transporter II [Medicago truncatula]	DV622884		SGN-U268788
bf_cswbxxxx_0041f08.t3m.scf	1.00993	1.05283	1.25437	0.891453	1.54787	4.34379	0.974535	Group I	NA	NA	CV494712		SGN-U293344
bf_cswbxxxx_0020d04.t3m.scf	1.61956	0.689434	1.22704	1.39271	1.62315	1.43846	0.913056	Group I	ABH01187	zinc transporter protein [Ammopiptanthus mongolicus]	TC163004	similar to UP|Q6VM18_MEDTR (Q6VM18) Metal transport protein, partial (66%)	SGN-U296754
bf_cswbxxxx_0010g10.t3m.scf	0.628429	0.808014	0.898627	0.887724	0.507868	1.26515	0.875951	Group II	NP_178163	unknown protein [Arabidopsis thaliana]	CV492544		SGN-U289316
bf_cswbxxxx_0007e04.t3m.scf	0.830199	1.03407	1.0744	0.593201	0.583974	1.34562	1.1016	Group II	NA	NA	TC146867	homologue to UP|RL35_EUPES (Q9M5L0) 60S ribosomal protein L35, complete	SGN-U281679
bf_cswbxxxx_0001b05.t3m.scf	1.00322	0.775404	1.28604	0.887661	1.61417	4.57286	1.42762	Group I	NA	NA	CV491851		SGN-U290412
BF_CSCHXXXX_0045B04.T3M.SCF	0.486995	0.721745	1.02833	1.16258	0.991342	0.554714	1.02966	Group III	NP_565879	VCL1 (VACUOLELESS 1) [Arabidopsis thaliana]	CV472032		SGN-U294119
BF_CSCHXXXX_0022H10.T3M.SCF	0.442898	0.568966	0.957253	0.838467	0.708822	0.82913	0.903947	Group III	P37142	Bifunctional aspartokinase/homoserine dehydrogenase, chloroplast precursor (AK-HD) (AK-HSDH) [Includes: Aspartokinase ; Homoserine dehydrogenase ]	CV470265		SGN-U295742
BF_CSCHXXXX_0011E12.T3M.SCF	1.36894	1.11519	1.0814	1.4748	1.68355	1.81904	0.850172	Group I	BAF47751	multi antimicrobial extrusion family protein [Nicotiana tabacum]	CV469382		SGN-U295414
BF_CSCHXXXX_0008G01.T3M.SCF	1.923	0.623705	0.884869	0.890837	2.13258	2.43511	0.145099	Group I	NA	NA	CN514808	SP|Q41484|SPI5_SOLTU Serine protease inhibitor 5 precursor (gCDI-B1). {Solanum tuberosum;}, partial (47%)	SGN-U281136
bf_arrayxxx_0101a02.t7m.scf	0.86255	0.528667	1.03655	1.29737	0.657813	1.43716	1.64441	Group III	NA	NA	DN906207		SGN-U276794
bf_arrayxxx_0098b02.t7m.scf	1.71089	0.851413	0.983892	1.11898	10.6584	0.917152	1.14681	Group VII	NA	NA	DR037991		SGN-U278474
bf_arrayxxx_0093c01.t3m.scf	0.860806	1.11844	1.65717	2.80853	1.21901	0.772165	0.671252	Group VIII	NA	NA	DR037024		SGN-U268802
bf_arrayxxx_0087h08.t3m.scf	0.617222	0.889596	1.06921	0.82161	0.658373	1.18028	1.34178	Group III	CAB68135	translation initiation factor 3-like protein [Arabidopsis thaliana]	TC141729	similar to GB|AAG53613.1|12407658|AF285832 eukaryotic initiation factor 3E subunit {Arabidopsis thaliana} (exp=-1; wgp=0; cg=0), partial (98%)	SGN-U268661
bf_arrayxxx_0085h03.t3m.scf	0.46929	0.875818	1.25768	1.47241	1.6741	2.85024	1.00537	Group I	NA	NA	DN921205		SGN-U280259
bf_arrayxxx_0082g09.t3m.scf	0.691293	0.705379	0.923821	1.15891	1.34643	1.69833	1.79036	Group I	Q9SSV4	Inositol-3-phosphate synthase (Myo-inositol-1-phosphate synthase) (MI-1-P synthase) (IPS)	DN922885		SGN-U269103
bf_arrayxxx_0077c03.t7m.scf	1.09146	1.34648	1.03228	1.00263	0.466419	0.443508	1.01866	Group V	NP_001045123	Os01g0904400 [Oryza sativa (japonica cultivar-group)]	DN940952		SGN-U289504
bf_arrayxxx_0073h09.t7m.scf	1.55186	1.59356	0.955738	0.988917	0.949384	0.786755	0.919104	Group V	EAY89334	hypothetical protein OsI_010567 [Oryza sativa (indica cultivar-group)]	DN940051		SGN-U286131
bf_arrayxxx_0071c09.t3m.scf	1.43959	0.737237	0.979931	0.764978	2.17384	1.65467	0.626138	Group I	P31427	Leucine aminopeptidase, chloroplast precursor (LAP) (Leucyl aminopeptidase) (Proline aminopeptidase) (Prolyl aminopeptidase)	DN850072		SGN-U268586
bf_arrayxxx_0069h10.t3m.scf	0.262885	0.593571	0.895695	1.40891	0.987981	1.67148	0.913081	Group III	NA	NA	DN849627		SGN-U271608
bf_arrayxxx_0060b12.t7m.scf	0.757195	0.896144	0.912607	0.610249	0.386371	4.27201	0.665789	Group II	NA	NA	DN907938		SGN-U275143
bf_arrayxxx_0059a05.t7m.scf	1.53549	0.979562	1.32441	1.74474	1.4565	0.477858	0.865931	Group V	NA	NA	TC148233	similar to UP|Q294Q9_DROPS (Q294Q9) GA11523-PA (Fragment), partial (5%)	SGN-U270532
bf_arrayxxx_0058a11.t7m.scf	0.421798	1.12026	1.03099	1.17486	2.02612	0.676948	0.480335	Group III	NA	NA	DN907559		SGN-U268402
bf_arrayxxx_0056f01.t7m.scf	1.15837	1.14901	1.01868	0.929135	0.374923	0.638646	1.04035	Group V	NA	NA	DN907286		SGN-U275571
bf_arrayxxx_0053e02.t7m.scf	1.60302	0.764996	0.916033	1.039	2.70002	1.04356	0.805371	Group I	NA	NA	DV625544		SGN-U268244
bf_arrayxxx_0052e08.t3m.scf	2.25544	0.904998	1.00753	1.08946	2.3081	1.81704	0.255327	Group I	O24383	Cysteine protease inhibitor 10 precursor (PCPI-10) (Pcpi10)	TC159602	UP|CPI8_SOLTU (O24384) Cysteine protease inhibitor 8 precursor (PCPI-8) (Pcpi8) (Fragment), partial (96%)	SGN-U280995
bf_arrayxxx_0051f01.t3m.scf	1.08283	0.635555	1.0489	1.05189	1.72246	1.58452	0.928369	Group I	EAK90720	hypothetical protein CaO19.63 [Candida albicans SC5314]	TC155964	UP|Q2VCI9_SOLTU (Q2VCI9) Aspartic protease-like, partial (33%)	SGN-U287710
bf_arrayxxx_0051c02.t3m.scf	2.50768	0.779924	0.855052	0.810274	2.28048	6.1368	0.188526	Group I	AAZ94192	Kunitz-type protease inhibitor precursor [Solanum tuberosum]	DN941793		SGN-U281151
bf_arrayxxx_0049b11.t7m.scf	1.78774	0.649916	0.626622	0.95292	2.03891	2.19629	0.120337	Group I	AAL99261	aspartic proteinase inhibitor P2B4 [Solanum tuberosum]	CV472419		SGN-U281138
bf_arrayxxx_0048h04.t7m.scf	1.13012	1.08482	0.964378	2.72946	9.53384	0.907733	0.889132	Group VII	NA	NA	DN942160		SGN-U282621
bf_arrayxxx_0045g06.t7m.scf	0.644141	1.186	0.99665	1.24327	0.439237	1.10262	0.925356	Group II	NA	NA	DR035387		SGN-U296860
bf_arrayxxx_0045f08.t7m.scf	0.81498	0.998307	1.02236	0.646928	0.608533	2.0568	0.869806	Group II	NA	NA	DR035357		SGN-U274966
bf_arrayxxx_0044e12.t7m.scf	0.900159	1.05742	0.900543	0.634681	0.601252	3.30192	0.783971	Group II	NA	NA	DR034896		SGN-U285325
bf_arrayxxx_0043c12.t3m.scf	0.598477	0.559005	0.997907	0.744759	1.1203	0.755292	1.12003	Group III	AAM10321	AT5g67360/K8K14_8 [Arabidopsis thaliana]	DR034666		SGN-U276412
bf_arrayxxx_0041h11.t7m.scf	1.80572	0.5528	0.75288	0.65997	1.39096	1.61115	1.61549	Group I	ABE93733	SAM (and some other nucleotide) binding motif [Medicago truncatula]	DR034265		SGN-U294762
bf_arrayxxx_0038e10.t7m.scf	0.803733	1.16989	1.02849	0.617547	0.632325	3.00829	0.840335	Group II	NP_001058188	Os06g0644600 [Oryza sativa (japonica cultivar-group)]	DR034896		SGN-U285325
bf_arrayxxx_0038c05.t7m.scf	0.677429	1.2203	0.694415	0.710414	0.491749	0.548814	1.14616	Group V	NP_001057964	Os06g0589800 [Oryza sativa (japonica cultivar-group)]	DR034697		SGN-U299061
bf_arrayxxx_0037e12.t7m.scf	1.23066	0.97186	1.89605	1.92706	1.35388	1.94587	1.13502	Group VI	ABO81782	Protein kinase [Medicago truncatula]	DR034267		SGN-U278824
bf_arrayxxx_0036e06.t7m.scf	1.54452	1.00962	0.74763	0.808553	0.908964	1.5219	0.872669	Group II	BAB10842	nitrate transporter NTL1 [Arabidopsis thaliana]	DN938700		SGN-U295589
bf_arrayxxx_0036b02.t3m.scf	0.467931	0.624818	1.01689	0.812038	0.877999	0.823063	0.97186	Group III	AAD03392	mitochondrial ATPase beta subunit [Nicotiana sylvestris]	TC148529	homologue to UP|O82722_NICSY (O82722) Mitochondrial ATPase beta subunit, partial (40%)	SGN-U268636
bf_arrayxxx_0035b07.t7m.scf	1.63786	0.998623	0.837693	0.56615	0.521884	1.07654	0.291061	Group V	P51092	Leucoanthocyanidin dioxygenase (LDOX) (Leucocyanidin oxygenase) (Leucoanthocyanidin hydroxylase)	DN849567		SGN-U273856
bf_arrayxxx_0027e10.t7m.scf	1.22262	0.819705	1.82134	1.78713	1.17775	1.81573	0.983428	Group VI	AAC23542	receptor protein kinase [Ipomoea trifida]	DR036508		SGN-U289615
bf_arrayxxx_0026h12.t7m.scf	0.6607	0.511934	1.03489	0.610426	1.32957	1.29483	1.05329	Group III	NP_189952	unknown protein [Arabidopsis thaliana]	DN906687		SGN-U277419
bf_arrayxxx_0014b07.t7m.scf	1.41492	1.18972	1.09664	0.591348	1.68671	0.366559	0.842012	Group IV	NP_179888	N-acetyltransferase [Arabidopsis thaliana]	DN939036		SGN-U290934
bf_arrayxxx_0005b03.t3m.scf	0.857547	1.11366	0.966259	0.652124	0.480005	3.57135	0.694235	Group II	NP_196435	RNA binding / structural constituent of ribosome [Arabidopsis thaliana]	DN905785		SGN-U270717
bf_arrayxxx_0003b05.t7m.scf	1.52842	1.66167	0.987337	0.890182	1.13861	1.00951	0.697024	Group I	NP_001053728	Os04g0594500 [Oryza sativa (japonica cultivar-group)]	DN922737		SGN-U283034
bf_acdcxxxx_0059d11.t3m.scf	1.05476	0.887959	0.990634	0.665898	0.538816	2.02357	1.06698	Group II	ABO78779	nucleotide binding , related [Medicago truncatula]	CV431807		SGN-U293618
bf_acdcxxxx_0058g11.t3m.scf	1.27975	0.816308	2.83839	2.04442	1.20129	0.900316	1.44591	Group VI	NA	NA	TC138226	similar to RF|NP_189499.1|15233037|NM_113778 ATP binding {Arabidopsis thaliana} (exp=-1; wgp=0; cg=0), partial (30%)	SGN-U273166
bf_acdcxxxx_0041c09.t3m.scf	0.616093	0.576867	1.49575	1.28717	1.23107	0.911172	0.836553	Group III	AAB58728	cytosolic NADP-malic enzyme [Lycopersicon esculentum]	CV431048		SGN-U287564
bf_acdcxxxx_0005e04.t3m.scf	1.18566	0.870445	1.27628	1.00097	1.15588	1.57764	1.77553	Group I	P10967	1-aminocyclopropane-1-carboxylate oxidase homolog (Protein E8)	TC147179	similar to UP|O24018_LYCES (O24018) E8 protein homolog, partial (55%)	SGN-U292031
bf_acdaxxxx_0058e12.t3m.scf	1.24058	0.907683	0.97375	1.10252	1.92039	2.39202	0.722029	Group I	CAC10358	protein phosphatase 2C [Nicotiana tabacum]	TC144197	similar to UP|Q8RVG0_TOBAC (Q8RVG0) Protein phosphatase 2C, partial (72%)	SGN-U275362
bf_acdaxxxx_0055b10.t3m.scf	2.42054	1.11165	0.918605	0.840597	2.09351	1.339	0.321315	Group I	NA	NA	CV286465		SGN-U280998
ACDA04180E04.T3m.scf	1.53915	0.735082	1.08027	1.09474	1.6097	1.18044	1.3094	Group I	NA	NA	CN465729	homologue to SP|P20144|WUN1_SOLTU Wound-induced protein 1. {Solanum tuberosum;}, partial (53%)	SGN-U269561
ACDA04095F03.T3m.scf	1.51993	0.844456	0.916032	0.988216	2.23346	1.55907	0.43534	Group I	CAA31578	p340/p34021 [Solanum tuberosum]	CN465664	similar to SP|P20347|CPI1_SOLTU Cysteine protease inhibitor 1 precursor (PCPI 8.3) (P340) (P34021). {Solanum tuberosum;}, partial (69%)	SGN-U280995
ACDA04025H05.T3m.scf	0.618912	1.06722	0.950296	0.883999	0.566116	1.78759	0.896581	Group II	NA	NA	CN465602	homologue to UP|AAR17783 (AAR17783) Ribosomal protein L3, partial (9%)	SGN-U286784
ACDA03992E08.T3m.scf	0.559988	0.809474	1.35119	1.57325	1.74646	1.10951	1.24246	Group III	NA	NA	CN465573	Maize mitochondrial 26S rRNA gene and flanks	SGN-U278131
ACDA03973D01.T3m.scf	2.04836	0.914185	0.954722	1.02988	2.0683	1.19636	0.480495	Group I	NA	NA	CN465561	homologue to SP|Q00652|CPI9_SOLTU Cysteine protease inhibitor 9 precursor (PKIX) (pT1). {Solanum tuberosum;}, partial (21%)	SGN-U280995
ACDA03942A06.T3m.scf	1.54696	0.952616	0.960357	1.00635	1.94674	0.974566	0.6496	Group I	Q41448	Aspartic protease inhibitor 7 precursor (Cathepsin D inhibitor p749)	CN465536	similar to SP|Q41480|API1_SOLTU Aspartic protease inhibitor 1 precursor (pA1) (gCDI-A1) (STPIA)(STPID). {Solanum tuberosum;}, partial (68%)	SGN-U281151
ACDA03920G08.T3m.scf	1.04458	0.907523	0.926255	1.03435	1.93898	1.50908	0.796275	Group I	NA	NA	CN465516	homologue to UP|Q9ZRB6 (Q9ZRB6) Ci21A protein, partial (29%)	SGN-U281149
ACDA03803E11.T3m.scf	0.571279	1.07756	0.908586	0.961271	0.473148	1.79846	0.887097	Group II	NA	NA	CN465430	homologue to UP|Q8LJW0 (Q8LJW0) 40S ribosomal S4 protein, partial (12%)	SGN-U268265
ACDA03728G08.T3m.scf	0.493874	0.779378	0.984071	1.04339	1.0395	0.600171	0.922837	Group III	NA	NA	CN465378	homologue to PIR|T07608|T07608 chloride channel protein homolog CLC1 - potato {Solanum tuberosum;}, partial (10%)	SGN-U273459
ACDA03474B06.T3m.scf	0.646615	0.535056	1.11915	0.904479	1.3194	0.834305	1.07775	Group IV	NP_001050476	Os03g0454100 [Oryza sativa (japonica cultivar-group)]	CN465222		SGN-U269634
ACDA03147G03.T3m.scf	1.51678	0.843547	0.974665	0.716522	0.991818	1.72095	0.884553	Group I	NA	NA	CN464978		SGN-U288217
ACDA02590H10.T3m.scf	0.655998	0.592973	1.17855	1.04821	1.28971	0.757574	1.11055	Group IV	NA	NA	CN464515		SGN-U290717
ACDA02270F02.T3m.scf	0.455846	0.656792	0.946388	0.944241	0.897706	0.813493	1.56043	Group III	NP_568528	unknown protein [Arabidopsis thaliana]	CN464279	similar to UP|Q94BY4 (Q94BY4) AT5g35570/K2K18_1, partial (13%)	SGN-U293718
ACDA02120A08.T3m.scf	0.532247	0.974291	0.995609	0.595461	0.564225	3.16229	0.946915	Group II	NA	NA	CN464170	homologue to UP|Q9FK53 (Q9FK53) Similarity to GAR1 protein, partial (19%)	SGN-U269216
ACDA01685E05.T3m.scf	1.09229	1.16628	1.26399	1.29881	1.83338	4.89667	0.728547	Group I	NA	NA	CN463810		SGN-U278774
ACDA01221F09.T3m.scf	0.811078	1.16654	0.945553	0.635494	0.599422	2.21127	0.897907	Group II	ABC01902	putative 60S ribosomal protein L7-like protein [Solanum tuberosum]	TC135452	weakly similar to PRF|1909359B|445613|1909359B ribosomal protein L7. {Solanum tuberosum} (exp=-1; wgp=-1; cg=-1), partial (66%)	SGN-U270953
ACDA00263F11.T3m.scf	0.431301	1.90856	1.17669	0.90568	0.630664	0.453873	0.855401	Group III	YP_635620	maturase K [Solanum tuberosum]	TC132820	UP|MATK_SOLTU (P32088) Maturase K (Intron maturase), complete	SGN-U298548
174D01AF.esd	1.1118	0.983787	0.856395	0.894932	3.96175	1.93914	0.312208	Group I	AAZ94181	proteinase inhibitor II precursor [Solanum tuberosum]	TC142517	UP|Q3S493_SOLTU (Q3S493) Proteinase inhibitor II, complete	SGN-U268244
174A09AF.esd	2.41956	0.489416	0.561382	0.744396	1.92287	2.71829	0.109575	Group I	AAZ94184	Kunitz-type protease inhibitor precursor [Solanum tuberosum]	TC143614	homologue to UP|API1_SOLTU (Q41480) Aspartic protease inhibitor 1 precursor (pA1) (gCDI-A1) (STPIA) (STPID), complete	SGN-U281138
168H01AF.esd	0.498986	0.837962	1.01421	0.630155	0.562968	3.0293	1.03536	Group II	NP_176007	NOP56 [Arabidopsis thaliana]	TC139730	similar to GB|AAG40838.1|11878189|AF302492 NOP56-like protein {Arabidopsis thaliana} (exp=-1; wgp=0; cg=0), partial (41%)	SGN-U271440
167G02AF.esd	0.361573	0.794268	0.944225	0.932213	0.560526	1.61851	0.974561	Group III	ABB55388	elongation factor 1-alpha-like [Solanum tuberosum]	TC132935	UP|Q2V985_SOLTU (Q2V985) Elongation factor-1 alpha-like, complete	SGN-U277731
167E07AF.esd	0.479471	0.731198	0.96535	0.804694	0.575415	1.91867	0.954315	Group II	NA	NA	CK262659		SGN-U277731
155B08AF.esd	0.521063	0.861059	0.920975	0.671729	0.457326	1.82547	0.912385	Group II	EAY75771	hypothetical protein OsI_003618 [Oryza sativa (indica cultivar-group)]	TC148754	similar to RF|NP_849992.1|30680811|NM_179661 RNA binding {Arabidopsis thaliana} (exp=-1; wgp=0; cg=0), partial (29%)	SGN-U277661
153A03AF.esd	1.7585	0.359611	0.734128	0.981001	2.28579	2.28804	0.116334	Group I	NA	NA	TC136100	homologue to UP|API8_SOLTU (P17979) Aspartic protease inhibitor 8 precursor (pi8) (PI-8) (API) (API-8) (Cathepsin D inhibitor), partial (95%)	SGN-U281153
137E10AF.esd	0.572179	1.11624	0.882649	0.868089	0.967878	0.648793	0.947568	Group III	AAG22607	aldehyde oxidase [Lycopersicon esculentum]	TC147270	abscisic aldehyde oxidase [Solanum tuberosum]	SGN-U270171
137C11AF.esd	1.76097	1.24721	0.935526	0.926993	0.69823	2.12795	1.12975	Group I	NP_199585	unknown protein [Arabidopsis thaliana]	BG351966		SGN-U279297
134H08AF.esd	1.67997	0.78398	0.853519	1.1885	2.12189	0.804193	1.46209	Group I	NA	NA	BG351947		SGN-U293169
133A11AF.esd	0.724832	0.797035	0.978624	0.66372	0.596983	1.60505	0.945473	Group II	EAY87110	hypothetical protein OsI_008343 [Oryza sativa (indica cultivar-group)]	TC151689	similar to UP|Q9FHY6_ARATH (Q9FHY6) GAMM1 protein-like, partial (88%)	SGN-U271987
115F11AF.esd	0.745482	0.653595	1.03104	0.918498	1.04194	0.652325	1.41016	Group IV	NP_180079	catalytic/ protein phosphatase type 2C/ protein serine/threonine phosphatase [Arabidopsis thaliana]	BI405732	similar to PIR|T06308|T06308 protein phosphatase 2C homolog F11C18.60 - Arabidopsis thaliana, partial (70%)	SGN-U274159
106G08AF.esd	0.474896	0.648062	0.85735	1.17007	0.851485	1.06551	1.26802	Group III	P43282	S-adenosylmethionine synthetase 3 (Methionine adenosyltransferase 3) (AdoMet synthetase 3)	TC142958	homologue to UP|METM_LYCES (P43282) S-adenosylmethionine synthetase 3 (Methionine adenosyltransferase 3) (AdoMet synthetase 3) , partial (76%)	SGN-U268465
093D11AF.esd	0.577705	0.892822	1.2164	0.800385	0.553423	2.57669	0.824063	Group II	AAM14093	putative bystin [Arabidopsis thaliana]	TC143395	similar to UP|Q6EQN5_ORYSA (Q6EQN5) Bystin (51.6 kD)-like, partial (39%)	SGN-U277936
090D11AF.esd	0.46173	1.07676	0.975759	0.959142	1.1441	0.665732	1.02706	Group III	ABE77904	TPR repeat [Medicago truncatula]	TC162846	similar to UP|Q9XI40_ARATH (Q9XI40) F9L1.23 protein, partial (9%)	SGN-U293605
087E03AF.esd	0.605055	1.62256	1.47679	3.65754	9.25265	1.33538	1.26306	Group VII	NP_566891	sugar porter/ transporter [Arabidopsis thaliana]	BG351101		SGN-U280567
052F08AF.esd	0.590473	1.38145	0.919573	0.83531	0.606693	2.14942	0.928111	Group II	NA	NA	BF154077	homologue to UP|AAR26018 (AAR26018) NADH dehydrogenase subunit 5, partial (2%)	SGN-U281942
042A07AF.esd	2.15001	0.865834	0.980938	0.940221	1.87651	1.90503	0.416984	Group I	NA	NA	CN515567		SGN-U281155
030C05AF.esd	2.18679	0.533526	0.824226	0.984926	2.15883	1.91869	0.166703	Group I	AAZ94184	Kunitz-type protease inhibitor precursor [Solanum tuberosum]	CN516318		SGN-U281152
021B06AF.esd	0.471785	0.953355	0.966288	1.0132	1.01254	0.591201	1.12101	Group III	NA	NA	BF153391	homologue to UP|Q8L7S4 (Q8L7S4) At1g68060/T23K23_9, partial (8%)	SGN-U293409
