# Supplementary material for: Gene Expression Changes in Phosphorus Deficient Potato (Solanum tuberosum L.) Leaves and the Potential for Diagnostic Gene Expression Markers
Source: PLoS One. 2011 Sep 14;6(9):e24606. doi: 10.1371/journal.pone.0024606 (PMC3173461; doi:10.1371/journal.pone.0024606)
Supplement: Table S2 — Normalised signal values and predictive power of 200 genes identified by a support vector machine algorithm for the class prediction of the physiological Pi status of field grown potato leaves. (XLSX) [file pone.0024606.s003.xlsx]

## Sheet: Sheet1
Table S2. Normalised signal values and predictive power of 200 genes identified by a support vector machine algorithm for the class prediction of the physiological P status of field grown potato leaves.
The support vector machine implemented in the Class Prediction tool of GeneSpring GX was used to classify the data. Sets of diagnostic genes were selected using the Golub method with the Polynomial Dot Product (Order 1) kernel function.
		Time (d) relevant to the withdrawal of P from the nutrient solution
		0	1	3	7	17	29	31
Probe ID	Predictive Strength	Normalised signal valuesa
MICRO.12238.C1	0.803	1.50073	1.0037	2.64872	2.81666	1.06151	1.69726	1.43626
STMEU15TV	0.724	1.42147	0.866668	1.96435	2.4911	1.59842	1.14618	1.16316
MICRO.11800.C1	0.589	1.35368	1.44016	1.13092	2.22153	4.79578	1.58308	0.985786
PotatoF0996.scf	0.579	0.817305	0.925978	1.23663	2.96126	20.5076	50.8222	1.40224
MICRO.3180.C2	0.575	1.56704	0.94551	4.16074	3.91416	1.18008	2.22275	1.11048
MICRO.712.C31	0.567	2.05221	1.34159	1.36939	3.05328	10.0436	8.27821	1.43477
STMJA76TV	0.555	1.31569	0.827338	4.24066	5.2692	1.43777	2.06823	1.4048
bf_arrayxxx_0037e12.t7m.scf	0.552	1.23066	0.97186	1.89605	1.92706	1.35388	1.94587	1.13502
POAC664TV	0.549	0.721727	0.811181	0.86819	0.839277	0.428228	0.336283	0.777055
bf_ivrootxx_0061c03.t3m.scf	0.547	1.23143	2.05543	1.27176	9.2883	68.3841	1.29419	0.684897
MICRO.6284.C1	0.545	1.09079	2.73396	2.35035	2.12413	8.19627	1.64651	0.562212
MICRO.13119.C1	0.543	1.51527	1.32506	2.9539	3.2577	1.27997	2.27386	1.15075
MICRO.14151.C1	0.54	1.22648	0.831824	1.73012	1.71202	1.04399	1.7061	1.21575
MICRO.5327.C4	0.53	1.2087	1.21201	1.0652	1.20358	1.77835	1.76614	1.0242
MICRO.7275.C1	0.518	0.9192	1.44253	1.20339	4.14633	11.7305	2.46452	1.04317
MICRO.4091.C1	0.498	2.31176	1.22916	9.56065	5.39406	0.64245	0.869987	2.44309
bf_mxflxxxx_0027g02.t3m.scf	0.495	1.30357	1.07894	2.39194	2.40476	1.2235	0.894661	1.26362
BPLI5I11TH	0.495	1.29256	0.878867	2.1734	2.26399	1.1391	1.20824	1.03184
bf_mxlfxxxx_0065f11.t3m.scf	0.479	0.78993	1.01785	1.28918	2.72132	14.2045	25.1221	1.32008
MICRO.14933.C4	0.478	1.60805	1.37828	1.04064	3.04711	11.1051	0.655632	1.00837
MICRO.16944.C1	0.477	1.25777	1.85431	1.24007	4.65196	12.9428	2.10802	1.03662
MICRO.10445.C1	0.473	1.47666	0.814475	3.43576	3.47278	1.04953	0.702035	1.62713
MICRO.14151.C3	0.473	1.13101	0.823102	1.87196	1.65375	1.13529	1.90725	1.11331
MICRO.12808.C1	0.47	1.56806	0.967268	2.28455	2.58532	1.0149	2.12081	0.982644
MICRO.10449.C1	0.467	1.81319	0.950669	3.79485	2.68006	0.834622	0.831226	1.51302
STMDB94TV	0.461	1.61753	1.10051	2.17529	2.95204	1.0227	1.18987	1.21282
MICRO.4054.C3	0.461	0.625826	0.824387	0.885647	0.706	0.715647	0.42119	0.791296
MICRO.11599.C1	0.46	1.25593	1.09054	1.06545	2.01032	2.48669	1.66809	2.80929
MICRO.11710.C1	0.459	1.70369	0.684875	2.45036	3.77491	1.52226	1.62934	1.6907
MICRO.7771.C2	0.458	0.918309	0.947861	1.69337	2.90155	2.41104	2.27628	0.777322
MICRO.3542.C1	0.45	1.24524	1.12349	1.85175	1.7532	1.07219	2.01229	1.14415
MICRO.12182.C2	0.448	1.32224	0.66004	1.86744	2.06001	1.40952	2.43116	1.27537
bf_mxflxxxx_0047g06.t3m.scf	0.444	1.19085	0.670278	1.81136	2.30978	1.71114	1.86347	1.29109
bf_mxlfxxxx_0070e03.t3m.scf	0.442	2.17064	0.677281	5.75022	7.06276	1.73815	2.2579	1.9735
MICRO.15952.C1	0.439	0.696965	1.34476	0.711253	0.678893	0.730381	0.10317	0.390697
MICRO.3541.C2	0.438	0.960516	5.05145	1.51284	18.1535	127.843	1.617	0.464731
MICRO.7762.C1	0.432	1.12851	0.788974	1.52419	1.83006	1.05496	1.32235	1.42204
bf_mxlfxxxx_0054c11.t3m.scf	0.431	1.27383	1.02356	0.949983	3.7707	61.5315	0.939144	0.8789
MICRO.4515.C2	0.427	1.44324	1.03811	1.42389	1.55355	1.29653	2.15564	1.0102
MICRO.6129.C1	0.425	1.392	3.08472	2.01887	3.47867	13.5938	0.949279	0.709595
MICRO.3420.C1	0.422	0.56736	0.81897	0.968573	0.698283	0.562591	0.910277	0.958024
MICRO.139.C3	0.421	1.54973	1.21559	1.41322	1.61051	1.06357	1.57476	0.913062
MICRO.14886.C1	0.421	0.570586	0.76543	0.867161	0.974447	0.477929	0.404589	0.728253
STMGI41TV	0.419	1.36714	1.09515	1.7468	2.10831	0.851016	1.50401	1.30373
STMIV34TV	0.418	1.0961	0.711052	1.72988	1.98401	1.27251	1.70468	1.52117
MICRO.10606.C2	0.417	1.34237	1.50782	1.32832	1.20448	6.8546	1.00694	1.15033
bf_mxlfxxxx_0031f04.t3m.scf	0.416	1.44961	0.762877	2.04128	2.16934	1.2509	1.8118	1.19425
STMEZ85TV	0.413	1.48977	0.764881	1.43347	1.43206	1.2042	1.35635	1.29821
MICRO.1707.C7	0.413	0.974358	1.13699	1.85014	2.41475	1.13404	1.22528	1.27724
STMCP93TV	0.411	1.29976	1.14356	1.43559	1.59567	1.1629	1.0693	0.981719
STMGD07TV	0.411	0.679143	0.713444	0.949162	0.995718	0.975485	0.772881	0.968109
MICRO.15540.C1	0.405	1.17234	1.02421	1.03479	1.41879	2.48192	1.10921	0.905226
bf_mxlfxxxx_0023g05.t3m.scf	0.403	1.42279	1.06092	1.64304	2.01471	1.16606	0.842694	1.12625
bf_ivrootxx_0062a06.t3m.scf	0.402	0.670077	1.63314	1.28327	10.7698	92.5397	1.48985	1.04958
MICRO.9466.C1	0.401	1.1896	0.972084	1.1155	1.20424	1.42821	1.23469	1.10173
MICRO.1773.C1	0.401	1.34857	0.996507	1.68046	1.44524	0.98827	1.08079	1.10158
MICRO.14933.C1	0.401	1.09659	1.12906	1.08611	2.79405	14.7528	0.708336	0.941574
STMCT35TV	0.4	1.39594	0.979819	1.46219	1.61445	1.1456	1.02625	1.37219
MICRO.3798.C1	0.39	1.22653	0.896906	1.4525	1.71832	0.989472	1.50441	0.96742
bf_mxlfxxxx_0002c08.t3m.scf	0.389	1.01329	0.909487	1.39564	1.99759	1.21523	2.37252	0.949762
STMED23TV	0.389	1.34565	0.628538	1.47432	2.21757	1.67333	1.34706	1.10079
MICRO.16727.C1	0.388	1.31666	1.09513	2.1779	1.93572	0.912038	1.69474	0.871401
MICRO.4830.C2	0.388	1.26579	0.659922	2.80683	2.3152	0.950216	1.77223	0.979614
MICRO.12208.C1	0.386	1.18485	1.03222	2.70798	2.83668	1.30504	1.36212	1.05709
MICRO.11274.C1	0.381	1.7061	0.99659	2.17041	1.74524	0.905949	1.61081	0.843075
MICRO.5923.C2	0.381	1.20835	0.789644	1.64577	1.87182	1.85481	1.39768	1.20708
MICRO.1805.C2	0.38	0.90229	0.747775	1.89505	1.70336	1.59185	1.62725	1.40881
MICRO.3312.C2	0.379	1.13261	1.13651	0.903187	1.95492	2.96361	1.59634	1.07242
MICRO.14721.C1	0.378	1.46928	0.768462	1.2245	1.33198	1.31278	1.694	1.21324
MICRO.2765.C1	0.377	1.29974	1.02488	1.01865	1.17568	3.73937	1.41462	0.974403
MICRO.8713.C2	0.375	1.46403	1.26572	0.79822	0.564522	0.829888	0.611111	0.424079
MICRO.1414.C1	0.375	0.621806	0.445205	1.00732	0.913772	0.969237	0.483432	0.917262
MICRO.341.C3	0.375	0.97208	1.18908	0.937027	0.809129	0.515834	0.655749	0.801539
MICRO.3542.C3	0.374	1.32724	1.05097	1.2891	1.47626	1.31429	1.52315	0.877322
bf_mxlfxxxx_0032g01.t3m.scf	0.374	0.963979	1.04361	1.54058	2.39613	1.29103	2.02162	0.854167
MICRO.1026.C2	0.368	0.822925	1.09692	0.943796	0.947048	0.280249	0.391604	1.08529
MICRO.10996.C1	0.367	1.14086	1.0132	1.16627	1.52272	2.43659	0.741499	1.02053
MICRO.1336.C3	0.365	0.746723	0.910795	0.955436	0.871398	0.639195	0.501269	0.928439
MICRO.2616.C1	0.365	1.25658	0.970331	1.44295	1.51108	0.996816	1.5569	1.18626
MICRO.5875.C1	0.363	1.1588	1.32791	0.949422	0.806398	0.593749	0.4473	0.97207
bf_cswbxxxx_0001b05.t3m.scf	0.359	1.00322	0.775404	1.28604	0.887661	1.61417	4.57286	1.42762
MICRO.14819.C1	0.359	1.19321	1.19673	0.963851	0.746472	5.22265	7.56419	1.11396
MICRO.2851.C1	0.357	1.10433	1.16614	0.862536	0.787581	0.752027	0.622596	0.882196
MICRO.5320.C1	0.356	1.40322	0.862931	1.18587	1.26041	1.11368	1.52775	1.04401
MICRO.3221.C1	0.356	0.663646	1.12186	1.13354	1.77566	2.68458	0.97152	1.02742
MICRO.2286.C92	0.355	2.53591	0.948949	4.92305	3.20008	0.551411	0.594933	1.85254
MICRO.1026.C7	0.353	0.71535	1.22887	0.993342	0.837949	0.220707	0.45724	1.04826
MICRO.8048.C1	0.353	0.878866	1.18025	0.88573	0.88361	0.789322	0.466376	0.962286
MICRO.2825.C1	0.352	0.736797	1.24134	0.984426	0.918717	0.165694	0.372112	1.21757
SDBN003I18u.scf	0.352	0.870236	0.971169	0.93672	0.795823	0.993491	0.376903	1.04358
MICRO.13158.C4	0.349	1.32556	0.935415	1.41328	1.45054	1.008	4.7544	0.984513
STMCV29TV	0.347	1.61478	1.2361	1.06971	1.16776	2.31536	1.3051	0.741587
MICRO.7420.C1	0.347	1.11642	1.03424	1.15164	1.52929	8.20528	1.64081	0.919639
MICRO.12655.C1	0.346	1.12532	1.2328	0.990132	1.66572	2.48239	0.868911	0.961406
MICRO.8918.C1	0.344	1.0606	1.1072	5.88152	8.35508	2.16188	1.36017	0.662548
bf_stolxxxx_0053h03.t3m.scf	0.344	0.918286	1.17687	1.04074	0.838958	0.539349	0.465861	1.01015
STMCG29TH	0.343	0.674261	1.33391	0.919263	0.966106	0.259116	0.374409	0.995812
MICRO.1026.C4	0.343	0.892274	1.13504	1.04552	0.868405	0.22604	0.460924	1.09157
bf_suspxxxx_0052e04.t3m.scf	0.343	1.27343	1.07859	1.34941	2.0191	0.961279	1.00302	1.14142
MICRO.1389.C1	0.342	1.06504	0.930557	2.57605	3.01142	1.26512	1.59367	1.01277
STDB005B07u.scf	0.341	1.33411	1.25842	1.01182	1.33795	1.65966	1.66191	0.88348
MICRO.2765.C3	0.34	1.34338	0.929975	1.04563	1.11037	3.81332	1.41732	0.878246
MICRO.8568.C2	0.339	0.52405	0.880636	0.854542	0.91019	0.576459	0.247888	0.656408
MICRO.633.C3	0.339	1.38007	0.75244	1.75472	1.96707	1.15685	1.61553	0.924693
MICRO.10323.C1	0.339	1.11111	0.82697	1.54349	1.64602	1.28571	1.41321	1.10388
MICRO.2883.C2	0.338	0.512256	0.746902	1.59104	0.807478	0.691031	0.828014	0.587639
bf_mxlfxxxx_0002b03.t3m.scf	0.338	1.36023	1.09766	0.943647	1.23151	2.13083	0.972157	0.880827
MICRO.14756.C2	0.337	0.585863	0.583218	1.00032	0.907161	1.03416	0.584842	0.928881
MICRO.4267.C1	0.337	0.961496	1.08462	0.864182	0.903905	0.662065	0.449029	0.861395
BPLI4N10TH	0.336	1.82652	0.876878	9.29811	2.96115	0.645728	0.990304	1.63146
MICRO.331.C89	0.335	1.08559	0.922084	0.82473	0.967022	0.606163	0.285868	0.891478
087E03AF.esd	0.335	0.605055	1.62256	1.47679	3.65754	9.25265	1.33538	1.26306
MICRO.13580.C1	0.334	2.02352	0.778611	1.11619	1.6115	1.83325	1.92708	0.864263
MICRO.5000.C3	0.333	0.844485	1.23562	0.972505	0.866308	0.193249	0.390919	1.08034
MICRO.3665.C1	0.331	0.293656	0.668438	0.864844	1.03998	0.96161	0.810677	1.08127
MICRO.929.C1	0.33	0.569567	0.719864	1.05688	0.976129	1.07489	0.575357	0.938678
MICRO.9519.C2	0.33	0.768359	0.914587	0.800057	0.701369	0.522503	0.793164	0.95028
MICRO.9540.C1	0.33	1.00262	0.919961	1.45219	1.57249	1.14098	1.01468	1.09582
MICRO.4071.C1	0.329	0.564137	0.992709	0.886524	0.756993	0.554237	0.762173	0.978292
MICRO.15066.C1	0.329	1.61924	0.640869	1.95138	2.21579	1.3145	1.29611	1.23133
bf_arrayxxx_0012h01.t7m.scf	0.328	1.10071	1.03878	1.10406	1.36114	3.40166	0.713019	1.06429
MICRO.8403.C2	0.327	1.40036	0.59188	1.80095	2.40477	1.19774	1.99016	1.50858
MICRO.225.C1	0.326	0.514701	0.833375	1.08696	0.919278	0.883939	0.772244	1.12414
MICRO.2876.C2	0.325	1.89342	0.843966	9.57472	3.17033	0.644001	0.950454	1.59037
bf_mxflxxxx_0034c01.t3m.scf	0.325	1.36328	1.47262	1.4238	1.36113	0.950418	0.924287	0.779199
MICRO.17678.C1	0.325	0.984664	0.863459	0.916257	0.855902	0.989157	0.325633	0.78401
MICRO.8340.C1	0.323	1.00661	0.970566	0.90508	1.77172	3.25418	1.47716	1.0136
BF_LBCHXXXX_0037A12_T3M.SCF	0.323	1.41673	0.806484	1.19602	1.08304	1.38303	1.17891	1.26543
STMEN32TV	0.323	0.709817	0.977548	0.940897	0.871661	0.996754	0.58611	0.982871
MICRO.4890.C1	0.321	0.787673	0.757226	2.40331	3.69328	1.07339	1.06273	1.10529
MICRO.10933.C1	0.321	0.693873	1.3378	1.06621	0.996756	0.708277	0.507443	0.844911
STMGU42TV	0.32	1.17479	0.79947	1.54436	1.90105	1.26646	1.26077	1.17486
MICRO.13311.C1	0.319	1.24116	0.630997	1.38908	1.38876	1.51951	1.29707	1.39176
MICRO.5031.C1	0.319	1.05044	1.10113	0.91222	0.826492	0.588311	0.560214	1.04897
MICRO.11000.C1	0.319	1.4721	0.911173	1.01594	1.21888	1.26583	1.39175	1.20002
027G12AF.esd	0.319	0.692689	1.06288	0.843917	0.888	0.945685	0.373649	0.709101
MICRO.5640.C1	0.318	1.14564	0.896282	0.848804	0.399721	0.56983	0.545018	1.04197
MICRO.7205.C1	0.317	1.5896	1.12845	1.09651	0.871746	1.51304	0.919634	1.21107
MICRO.3458.C2	0.316	1.00131	0.882812	1.01019	0.849894	0.794581	0.653547	0.96653
MICRO.54.C1	0.315	0.455461	1.13766	0.951166	0.861201	0.797218	0.680406	1.00437
MICRO.10695.C1	0.315	0.99241	1.00126	1.1132	1.0918	1.66174	2.25716	1.05592
MICRO.18049.C1	0.314	1.44526	1.32908	0.931625	1.08694	2.30142	0.77949	2.03157
MICRO.10499.C1	0.313	1.88696	1.10526	2.83239	1.74629	0.75583	1.7519	0.999518
BPLI15B10TH	0.313	1.36508	0.943358	1.05787	1.0239	1.1251	1.43958	1.11506
MICRO.5039.C1	0.312	1.39776	1.18162	1.30435	1.26639	1.10345	1.4286	0.71649
STMCN42TV	0.312	1.62968	1.02797	1.19452	1.18139	1.12502	1.61708	0.744556
POAC259TV	0.312	1.02876	0.969664	1.11967	1.02281	1.80814	1.30234	1.04136
MICRO.8918.C2	0.311	1.15826	1.03852	6.1212	7.09593	1.74356	0.813165	0.711331
cPRO15J18TH	0.311	0.845503	0.92937	1.02394	0.811357	0.858864	0.525974	1.12338
cSTB11H6TH	0.31	0.561813	1.06783	0.9572	0.746075	0.470866	0.665544	0.932326
MICRO.11021.C1	0.31	1.09707	0.838418	1.68314	2.92887	1.47426	1.29924	1.32271
MICRO.849.C1	0.31	0.457851	0.843007	0.909821	0.776687	0.707009	0.829558	1.09743
BF_TUBSXXXX_0008C06_T3M.SCF	0.309	0.789164	1.20684	1.0536	0.924355	0.837846	0.451287	0.789137
STMGB46TV	0.309	0.932307	1.05073	0.838842	0.853916	0.696821	0.472756	0.709659
MICRO.10444.C1	0.309	0.977744	0.687291	2.7735	3.2515	1.00464	0.74364	1.76518
bf_suspxxxx_0012d02.t3m.scf	0.308	1.45324	0.764631	1.34585	1.28659	1.17393	2.06051	1.20743
MICRO.4854.C2	0.307	1.25327	0.411504	1.5404	1.91103	1.42823	2.79573	1.36787
MICRO.4686.C2	0.306	1.11111	1.05788	1.03968	1.29444	1.62623	1.33753	0.905998
MICRO.5425.C1	0.306	1.13251	1.09859	0.901617	0.755908	0.832818	0.384638	0.943944
ACDA00539E11.T3m.scf	0.306	0.432755	0.728885	0.912597	0.845668	0.721494	1.06493	0.804948
MICRO.13416.C2	0.305	1.31829	0.866392	1.37293	1.16895	1.08588	1.78727	1.15263
MICRO.5444.C1	0.305	0.381888	1.49888	0.909498	0.780313	0.817567	0.641217	0.964955
MICRO.13345.C1	0.305	1.55561	0.868472	10.228	5.40655	0.738824	0.869453	1.64035
MICRO.4496.C2	0.305	0.719032	0.951097	0.913856	0.837745	0.983231	0.376926	1.07125
MICRO.1511.C1	0.304	0.513241	1.08244	0.759149	0.763036	0.413546	1.20966	0.839139
MICRO.2391.C3	0.303	0.940683	0.896663	1.95839	1.96975	1.24362	1.89559	1.00455
MICRO.5634.C4	0.303	1.38443	1.01346	1.0316	1.08903	1.31491	2.7002	1.15948
MICRO.4494.C2	0.302	1.10943	1.09473	0.92459	0.879141	0.519282	0.533712	0.968761
MICRO.3837.C2	0.302	1.1321	1.16892	1.36306	1.64184	2.04318	2.0031	0.744825
MICRO.11732.C2	0.301	1.41288	1.01393	1.18686	1.09366	1.0281	1.3551	0.949738
ACDA01685E05.T3m.scf	0.301	1.09229	1.16628	1.26399	1.29881	1.83338	4.89667	0.728547
MICRO.12678.C3	0.3	1.59866	0.755521	1.06678	2.58114	9.8896	3.16256	0.862042
MICRO.4141.C1	0.3	0.568745	0.593376	0.965719	1.09186	1.31095	0.633999	0.941859
MICRO.2876.C1	0.3	1.86085	0.898732	8.2155	3.32397	0.652202	0.930293	1.53775
MICRO.10116.C1	0.3	1.53091	1.19791	1.01739	0.916075	1.14296	1.3429	0.928024
MICRO.12757.C1	0.3	1.5599	0.7998	1.99773	2.53222	1.31755	1.85229	1.0174
MICRO.7703.C1	0.299	1.49938	1.01202	1.30604	1.3126	0.904343	1.16183	1.14319
MICRO.3621.C4	0.299	1.29243	0.878487	1.23734	1.29329	1.23765	2.50233	1.28886
MICRO.2714.C1	0.298	0.43516	0.930475	0.848579	0.799728	0.822283	0.79103	1.09334
MICRO.13715.C1	0.298	1.49199	0.579221	1.1066	1.30494	2.40888	2.87563	1.254
MICRO.302.C1	0.297	0.663717	1.20153	1.02713	0.937419	0.534149	0.775436	0.932362
MICRO.11296.C1	0.297	1.10038	0.881698	2.6354	3.39318	1.19507	0.978933	0.805727
MICRO.12615.C1	0.297	1.00795	1.09954	0.860776	0.891622	0.757859	0.42153	0.88154
cSTA37H24TH	0.297	0.848126	0.407153	1.06014	0.821687	1.07172	0.860819	1.05185
MICRO.5830.C1	0.296	0.403622	0.870908	0.935088	0.918329	1.00528	0.67326	1.09961
MICRO.13856.C1	0.296	1.14797	0.891978	1.13365	1.34456	1.08097	2.1563	0.892186
MICRO.17423.C1	0.295	1.0108	1.10774	0.947124	0.732354	0.753006	0.67973	0.969939
MICRO.2050.C1	0.295	1.42033	0.926832	1.15062	1.22668	1.292	1.08939	0.978885
cSTB23O1TH	0.295	0.882572	1.10185	0.797425	0.582631	0.301539	1.39971	0.903626
MICRO.8814.C1	0.295	1.35898	0.997845	0.941067	1.12828	0.77266	2.84374	1.5867
MICRO.9542.C4	0.294	1.22349	0.86259	1.14724	1.00652	1.09806	2.44646	1.31227
BF_TUBSXXXX_0056B12_T3M.SCF	0.293	0.794371	1.3076	0.981421	1.03477	0.176225	0.378945	1.21959
MICRO.8437.C1	0.293	0.574578	0.923666	0.964965	0.964569	0.435696	0.828727	0.892861
cPRO14B5TH	0.293	1.24835	0.932594	1.08796	0.880438	1.41279	2.06974	1.01171
MICRO.16217.C1	0.292	0.950874	0.915471	1.0609	0.915871	0.806667	0.568254	1.0473
MICRO.1991.C1	0.292	0.432132	0.883947	1.0371	0.791748	0.799718	0.923204	0.96884
MICRO.9519.C1	0.292	0.785053	0.909995	0.821098	0.803947	0.583218	0.68034	0.949825
MICRO.9061.C3	0.291	1.92838	2.0831	0.938004	6.68862	1.27001	0.78084	1.28822
bf_ivrootxx_0023a09.t3m.scf	0.29	1.68621	0.895435	1.10478	1.16974	1.31265	1.01195	1.21616
bf_arrayxxx_0027e10.t7m.scf	0.29	1.22262	0.819705	1.82134	1.78713	1.17775	1.81573	0.983428
aCells are coloured according to normalised signal values as follows				Normalised signal value
			0.5	1	2
